# Supplementary material for: Cortical Abnormalities Associated With Pediatric and Adult Obsessive-Compulsive Disorder: Findings From the ENIGMA Obsessive-Compulsive Disorder Working Group
Source: Atypon-hosted journal article supplement (doi:10.1176/appi.ajp.2017.17050485), 2017-12-15
Supplement: appi.ajp.2017.17050485.ds002.Tables.pdf [file appi.ajp.2017.17050485.ds002.Tables.pdf]

## Supplementary Tables

|                                                                                                                                                                                                                |         |
|----------------------------------------------------------------------------------------------------------------------------------------------------------------------------------------------------------------|---------|
| <b>Table S1:</b> ENIGMA Obsessive-Compulsive Disorder Working Group Demographics, age, sex, and numbers breakdown for participating sites, separately for adult and pediatric samples.                         | Page 7  |
| <b>Table S2:</b> ENIGMA Obsessive-Compulsive Disorder Working Group Clinical characteristics breakdown for participating sites, separately for adult and pediatric samples.                                    | Page 9  |
| <b>Table S3:</b> Image acquisition parameters per site.                                                                                                                                                        | Page 11 |
| <b>Table S4:</b> Full mega-analytic results for cortical thickness of each structure for the adult OCD patients compared with adult healthy controls, controlling for age, sex and scan center.                | Page 13 |
| <b>Table S5:</b> Full mega-analytic results for surface area of each structure for the adult OCD patients compared with adult healthy controls, controlling for age, sex, scan center and ICV.                 | Page 15 |
| <b>Table S6:</b> Full mega-analytic results for cortical thickness of each structure for the pediatric OCD patients compared with pediatric healthy controls, controlling for age, sex and scan center.        | Page 18 |
| <b>Table S7:</b> Full mega-analytic results for surface area of each structure for the pediatric OCD patients compared with pediatric healthy controls, controlling for age, sex, scan center and ICV.         | Page 21 |
| <b>Table S8a:</b> Full mega-analytic results for cortical thickness of each structure for the adult medicated OCD patients compared with adult healthy controls, controlling for age, sex and scan center.     | Page 24 |
| <b>Table S8b:</b> Full mega-analytic results for cortical thickness of each structure for the adult unmedicated OCD patients compared with adult healthy controls, controlling for age, sex and scan center.   | Page 27 |
| <b>Table S8c:</b> Full mega-analytic results for cortical thickness of each structure for the adult medicated OCD patients compared with adult unmedicated patients, controlling for age, sex and scan center. | Page 30 |
| <b>Table S9a:</b> Full mega-analytic results for surface area of each structure for the adult medicated OCD patients compared with healthy adult controls, controlling for age, sex, scan center and ICV.      | Page 33 |
| <b>Table S9b:</b> Full mega-analytic results for surface area of each structure for the adult unmedicated OCD patients compared with adult healthy controls, controlling for age, sex, scan center and ICV.    | Page 36 |
| <b>Table S9c:</b> Full mega-analytic results for surface area of each structure for the adult medicated OCD patients compared with adult unmedicated patients, controlling for age, sex, scan center and ICV.  | Page 39 |

|                                                                                                                                                                                                                                               |         |
|-----------------------------------------------------------------------------------------------------------------------------------------------------------------------------------------------------------------------------------------------|---------|
| <b>Table S10a:</b> Full mega-analytic results for cortical thickness of each structure for the pediatric medicated OCD patients compared with pediatric healthy controls, controlling for age, sex and scan center.                           | Page 42 |
| <b>Table S10b:</b> Full mega-analytic results for cortical thickness of each structure for the pediatric unmedicated OCD patients compared with pediatric healthy controls, controlling for age, sex and scan center.                         | Page 45 |
| <b>Table S10c:</b> Full mega-analytic results for cortical thickness of each structure for the pediatric medicated OCD patients compared with pediatric unmedicated patients, controlling for age, sex and scan center.                       | Page 48 |
| <b>Table S11a:</b> Full mega-analytic results for surface area of each structure for the pediatric medicated OCD patients compared with pediatric healthy controls, controlling for age, sex, scan center and ICV.                            | Page 51 |
| <b>Table S11b:</b> Full mega-analytic results for surface area of each structure for the pediatric unmedicated OCD patients compared with pediatric healthy controls, controlling for age, sex, scan center and ICV.                          | Page 54 |
| <b>Table S11c:</b> Full mega-analytic results for surface area of each structure for the pediatric medicated OCD patients compared with pediatric unmedicated patients, controlling for age, sex, scan center and ICV.                        | Page 57 |
| <b>Table S12a:</b> Full mega-analytic results for cortical thickness of each structure for the adult OCD patients with current comorbid depression compared with adult healthy controls, controlling for age, sex and scan center.            | Page 60 |
| <b>Table S12b:</b> Full mega-analytic results for cortical thickness of each structure for the adult OCD patients with no current comorbid depression compared with adult healthy controls, controlling for age, sex and scan center.         | Page 63 |
| <b>Table S12c:</b> Full mega-analytic results for cortical thickness of each structure for the adult OCD patients with current comorbid depression compared with adult patients without, controlling for age, sex and scan center.            | Page 66 |
| <b>Table S13a:</b> Full mega-analytic results for surface area of each structure for the adult OCD patients with current depression compared with adult healthy controls, controlling for age, sex, scan center and ICV.                      | Page 69 |
| <b>Table S13b:</b> Full mega-analytic results for surface area of each structure for the adult OCD patients with no current comorbid depression compared with adult healthy controls, controlling for age, sex, scan center and ICV.          | Page 72 |
| <b>Table S13c:</b> Full mega-analytic results for surface area of each structure for the adult OCD patients with current comorbid depression compared with adult patients without, controlling for age, sex, scan center and ICV.             | Page 75 |
| <b>Table S14a:</b> Full mega-analytic results for cortical thickness of each structure for the pediatric OCD patients with current comorbid depression compared with pediatric healthy controls, controlling for age, sex and scan center.    | Page 78 |
| <b>Table S14b:</b> Full mega-analytic results for cortical thickness of each structure for the pediatric OCD patients with no current comorbid depression compared with pediatric healthy controls, controlling for age, sex and scan center. | Page 81 |
| <b>Table S14c:</b> Full mega-analytic results for cortical thickness of each structure for the pediatric OCD patients with current comorbid depression compared with pediatric patients without, controlling for age, sex and scan center.    | Page 84 |
| <b>Table S15a:</b> Full mega-analytic results for surface area of each structure for the pediatric OCD patients with current comorbid depression compared with pediatric healthy controls, controlling for age, sex, scan center and ICV.     | Page 87 |
| <b>Table S15b:</b> Full mega-analytic results for surface area of each structure for the pediatric OCD patients with no current comorbid depression compared with pediatric healthy controls, controlling for age, sex, scan center and ICV.  | Page 90 |

|                                                                                                                                                                                                                                            |          |
|--------------------------------------------------------------------------------------------------------------------------------------------------------------------------------------------------------------------------------------------|----------|
| <b>Table S15c:</b> Full mega-analytic results for surface area of each structure for the pediatric OCD patients with current comorbid depression compared with pediatric patients without, controlling for age, sex, scan center and ICV.  | Page 93  |
| <b>Table S16a:</b> Full mega-analytic results for cortical thickness of each structure for the adult OCD patients with current comorbid anxiety compared with adult healthy controls, controlling for age, sex and scan center.            | Page 96  |
| <b>Table S16b:</b> Full mega-analytic results for cortical thickness of each structure for the adult OCD patients with no current comorbid anxiety compared with adult healthy controls, controlling for age, sex and scan center.         | Page 99  |
| <b>Table S16c:</b> Full mega-analytic results for cortical thickness of each structure for the adult OCD patients with comorbid current anxiety compared with adult patients without, controlling for age, sex and scan center.            | Page 102 |
| <b>Table S17a:</b> Full mega-analytic results for surface area of each structure for the adult OCD patients with current comorbid anxiety compared with adult healthy controls, controlling for age, sex, scan center and ICV.             | Page 105 |
| <b>Table S17b:</b> Full mega-analytic results for surface area of each structure for the adult OCD patients with no current comorbid anxiety compared with adult healthy controls, controlling for age, sex, scan center and ICV.          | Page 108 |
| <b>Table S17c:</b> Full mega-analytic results for surface area of each structure for the adult OCD patients with current comorbid anxiety compared with adult patients without, controlling for age, sex, scan center and ICV.             | Page 111 |
| <b>Table S18a:</b> Full mega-analytic results for cortical thickness of each structure for the pediatric OCD patients with current comorbid anxiety compared with pediatric healthy controls, controlling for age, sex and scan center.    | Page 114 |
| <b>Table S18b:</b> Full mega-analytic results for cortical thickness of each structure for the pediatric OCD patients with no current comorbid anxiety compared with pediatric healthy controls, controlling for age, sex and scan center. | Page 117 |
| <b>Table S18c:</b> Full mega-analytic results for cortical thickness of each structure for the pediatric OCD patients with current comorbid anxiety compared with pediatric patients without, controlling for age, sex and scan center.    | Page 120 |
| <b>Table S19a:</b> Full meta-analytic results for surface area of each structure for the pediatric OCD patients with current comorbid anxiety compared with pediatric healthy controls, controlling for age, sex, scan center and ICV.     | Page 123 |
| <b>Table S19b:</b> Full mega-analytic results for surface area of each structure for the pediatric OCD patients with no current comorbid anxiety compared with pediatric healthy controls, controlling for age, sex, scan center and ICV.  | Page 126 |
| <b>Table S19c:</b> Full mega-analytic results for surface area of each structure for the pediatric OCD patients with current comorbid anxiety compared with pediatric patients without, controlling for age, sex, scan center and ICV.     | Page 129 |
| <b>Table S20:</b> Full mega-analytic results for surface area of each structure for the pediatric OCD patients with ordering/symmetry symptoms compared with pediatric patients without, controlling for age, sex, scan center and ICV.    | Page 132 |
| <b>Table S21a:</b> Full mega-analytic results for cortical thickness of each structure for the adult onset OCD patients compared with adult healthy controls, controlling for age, sex and scan center.                                    | Page 135 |
| <b>Table S21b:</b> Full mega-analytic results for cortical thickness of each structure for the childhood onset OCD patients compared with adult healthy controls, controlling for age, sex and scan center.                                | Page 138 |
| <b>Table S21c:</b> Full mega-analytic results for cortical thickness of each structure for the childhood onset OCD patients compared with adult onset patients, controlling for age, sex and scan center.                                  | Page 141 |
| <b>Table S22a:</b> Full mega-analytic results for surface area of each structure for the adult onset OCD patients compared with adult healthy controls, controlling for age, sex, scan center and ICV.                                     | Page 144 |

|                                                                                                                                                                                                                                                                                  |          |
|----------------------------------------------------------------------------------------------------------------------------------------------------------------------------------------------------------------------------------------------------------------------------------|----------|
| <b>Table S22b:</b> Full mega-analytic results for surface area of each structure for the childhood onset OCD patients compared with adult healthy controls, controlling for age, sex, scan center and ICV.                                                                       | Page 147 |
| <b>Table S22c:</b> Full mega-analytic results for surface area of each structure for the childhood onset OCD patients compared with adult onset patients, controlling for age, sex, scan center and ICV.                                                                         | Page 150 |
| <b>Table S23a:</b> Full mega-analytic results for cortical thickness of each structure for the age of onset regression analysis in adult OCD patients, controlling for age, sex and scan center. Correlation coefficient Pearsons r is reported.                                 | Page 153 |
| <b>Table S23b:</b> Full mega-analytic results for surface area of each structure for the age of onset regression analysis in adult OCD patients, controlling for age, sex, scan center and ICV. Correlation coefficient Pearsons r is reported.                                  | Page 156 |
| <b>Table S24a:</b> Full mega-analytic results for the cortical thickness of each structure for the age of onset regression analysis in pediatric OCD patients, controlling for age, sex and scan center. Correlation coefficient Pearsons r is reported.                         | Page 159 |
| <b>Table S24b:</b> Full mega-analytic results for the surface area of each structure for the age of onset regression analysis in pediatric OCD patients, controlling for age, sex, scan center and ICV. Correlation coefficient Pearsons r is reported.                          | Page 162 |
| <b>Table S25a:</b> Full mega-analytic results for the association between illness duration and the cortical thickness of each structure in adult OCD patients, controlling for age, sex and scan center. Correlation coefficient Pearsons r is reported.                         | Page 165 |
| <b>Table S25b:</b> Full mega-analytic results for the association between illness duration and the surface area of each structure in adult OCD patients, controlling for age, sex, scan center and ICV. Correlation coefficient Pearsons r is reported.                          | Page 168 |
| <b>Table S26a:</b> Full mega-analytic results for the association between illness duration and the cortical thickness of each structure in pediatric OCD patients, controlling for age, sex and scan center. Correlation coefficient Pearsons r is reported.                     | Page 171 |
| <b>Table S26b:</b> Full mega-analytic results for the association between illness duration and the surface area of each structure in pediatric OCD patients, controlling for age, sex, scan center and ICV. Correlation coefficient Pearsons r is reported.                      | Page 174 |
| <b>Table S27a:</b> Full mega-analytic results for the association between illness severity and the cortical thickness of each structure in adult OCD patients based on the YBOCS, controlling for age, sex and scan center. Correlation coefficient Pearsons r is reported.      | Page 177 |
| <b>Table S27b:</b> Full mega-analytic results for the association between illness severity and the surface area of each structure in adult OCD patients based on the YBOCS, controlling for age, sex, scan center and ICV. Correlation coefficient Pearsons r is reported.       | Page 180 |
| <b>Table S28a:</b> Full mega-analytic results for the association between illness severity and the cortical thickness of each structure in pediatric OCD patients based on the CYBOCS, controlling for age, sex and scan center. Correlation coefficient Pearsons r is reported. | Page 183 |
| <b>Table S28b:</b> Full mega-analytic results for the association between illness severity and the surface area of each structure in pediatric OCD patients based on the CYBOCS, controlling for age, sex, scan center and ICV. Correlation coefficient Pearsons r is reported.  | Page 186 |
| <b>Table S29a:</b> Overview of the effect sizes of the significant results ( $q < 0.05$ ) detected by the adult meta-analysis on cortical thickness controlled for age, sex and scan center.                                                                                     | Page 189 |
| <b>Table S29b:</b> Overview of the effect sizes of significant results ( $q < 0.05$ ) detected by the adult meta-analysis on surface area controlled for age, sex, scan center and ICV.                                                                                          | Page 192 |
| <b>Table S30a:</b> Full meta-analytic results for cortical thickness of each structure for the adult OCD patients compared with adult healthy controls, controlling for age, sex and scan center.                                                                                | Page 195 |
| <b>Table S30b:</b> Full meta-analytic results for cortical surface area of each structure for the adult OCD patients compared with adult healthy controls, controlling for age, sex, scan center and ICV.                                                                        | Page 198 |

|                                                                                                                                                                                                                                                                         |          |
|-------------------------------------------------------------------------------------------------------------------------------------------------------------------------------------------------------------------------------------------------------------------------|----------|
| <b>Table S31:</b> Overview of the effect sizes of significant results ( $q < 0.05$ ) detected by the pediatric meta-analysis on cortical thickness controlled for age, sex, scan center and ICV.                                                                        | Page 201 |
| <b>Table S32a:</b> Full meta-analytic results for cortical thickness of each structure for the pediatric OCD patients compared with pediatric healthy controls, controlling for age, sex and scan center.                                                               | Page 204 |
| <b>Table S32b:</b> Full meta-analytic results for cortical surface area of each structure for the pediatric OCD patients compared with pediatric healthy controls, controlling for age, sex, scan center and ICV.                                                       | Page 207 |
| <b>Table S33a:</b> Full results from the moderator analyses in the adult samples of mean age and field strength of scanner on cortical thickness controlled for age, sex, and scan center.                                                                              | Page 210 |
| <b>Table S33b:</b> Full results from the moderator analyses in the adult samples of mean age and field strength of scanner on surface area controlled for age, sex, scan center, and ICV.                                                                               | Page 213 |
| <b>Table S34a:</b> Full results from the moderator analyses in the pediatric samples of mean age and field strength of scanner on cortical thickness controlled for age, gender, scan center and ICV.                                                                   | Page 216 |
| <b>Table S34b:</b> Full results from the moderator analyses in the pediatric samples of mean age and field strength of scanner on surface area controlled for age, sex, scan center, and ICV.                                                                           | Page 219 |
| <b>Table S35:</b> Demographic and Clinical Characteristics of medicated and unmedicated OCD patients.                                                                                                                                                                   | Page 222 |
| <b>Table S36a:</b> Full mega-analytic results for cortical thickness of each structure for the medicated OCD patients on antidepressants compared with adult healthy controls, controlling for age, sex and scan center.                                                | Page 223 |
| <b>Table S36b:</b> Full mega-analytic results for cortical thickness of each structure for the medicated OCD patients on antidepressants & antipsychotics compared with adult healthy controls, controlling for age, sex and scan center.                               | Page 226 |
| <b>Table S36c:</b> Full mega-analytic results for cortical thickness of each structure for the medicated OCD patients on antidepressants versus those on antidepressants & antipsychotics, controlling for age, sex and scan center.                                    | Page 229 |
| <b>Table S37a:</b> Full mega-analytic results for cortical thickness of each structure for the age of onset squared regression analysis in adult OCD patients, controlling for age, sex and scan center. Correlation coefficient Pearson's $r$ is reported.             | Page 232 |
| <b>Table S37b:</b> Full mega-analytic results for surface area of each structure for the age of onset squared regression analysis in adult OCD patients, controlling for age, sex, scan center and ICV. Correlation coefficient Pearson's $r$ is reported.              | Page 235 |
| <b>Table S38a:</b> Full mega-analytic results for the cortical thickness of each structure for the age of onset squared regression analysis in pediatric OCD patients, controlling for age, sex and scan center. Correlation coefficient Pearson's $r$ is reported.     | Page 238 |
| <b>Table S38b:</b> Full mega-analytic results for the surface area of each structure for the age of onset squared regression analysis in pediatric OCD patients, controlling for age, sex, scan center and ICV. Correlation coefficient Pearson's $r$ is reported.      | Page 241 |
| <b>Table S39a:</b> Full mega-analytic results for the association between illness duration squared and the cortical thickness of each structure in adult OCD patients, controlling for age, sex and scan center. Correlation coefficient Pearson's $r$ is reported.     | Page 244 |
| <b>Table S39b:</b> Full mega-analytic results for the association between illness duration squared and the surface area of each structure in adult OCD patients, controlling for age, sex, scan center and ICV. Correlation coefficient Pearson's $r$ is reported.      | Page 247 |
| <b>Table S40a:</b> Full mega-analytic results for the association between illness squared duration and the cortical thickness of each structure in pediatric OCD patients, controlling for age, sex and scan center. Correlation coefficient Pearson's $r$ is reported. | Page 250 |
| <b>Table S40b:</b> Full mega-analytic results for the association between illness duration squared and the surface area of each structure in pediatric OCD patients, controlling for age, sex, scan center and ICV. Correlation coefficient Pearson's $r$ is reported.  | Page 253 |
| <b>Table S41a:</b> Full mega-analytic results for the association between illness severity squared and the cortical thickness of each structure in adult OCD patients based on the                                                                                      | Page 256 |

|                                                                                                                                                                                                                                                                                          |          |
|------------------------------------------------------------------------------------------------------------------------------------------------------------------------------------------------------------------------------------------------------------------------------------------|----------|
| YBOCS, controlling for age, sex and scan center. Correlation coefficient Pearsons r is reported.                                                                                                                                                                                         |          |
| <b>Table S41b:</b> Full mega-analytic results for the association between illness severity squared and the surface area of each structure in adult OCD patients based on the YBOCS, controlling for age, sex, scan center and ICV. Correlation coefficient Pearsons r is reported.       | Page 259 |
| <b>Table S42a:</b> Full mega-analytic results for the association between illness severity squared and the cortical thickness of each structure in pediatric OCD patients based on the CYBOCS, controlling for age, sex and scan center. Correlation coefficient Pearsons r is reported. | Page 262 |
| <b>Table S42b:</b> Full mega-analytic results for the association between illness severity squared and the surface area of each structure in pediatric OCD patients based on the CYBOCS, controlling for age, sex, scan center and ICV. Correlation coefficient Pearsons r is reported.  | Page 265 |

**TABLE S1:** ENIGMA Obsessive-Compulsive Disorder Working Group Demographics, age (in years), sex, and numbers breakdown for participating sites, separately for adult and pediatric samples.

| Study | Study PI       | Site, Country, Sample | Field Strength | Age (Mean ± SD) | % Male                        | Total N     | Total N Controls | Total N OCD |
|-------|----------------|-----------------------|----------------|-----------------|-------------------------------|-------------|------------------|-------------|
| 1     | Benedetti      | Milan, ITA            | 3T             | 31.68 ± 10.50   | 72.58                         | 62          | 32               | 30          |
| 2     | Beucke         | Berlin, GER           | 1.5T           | 32.05 ± 9.59    | 48.97                         | 194         | 104              | 90          |
| 3     | Cheng          | Kunming, CHN I        | 1.5T           | 31.23 ± 8.78    | 30.00                         | 60          | 38               | 22          |
| 4     |                | Kunming, CHN II       | 3T             | 28.70 ± 7.92    | 38.10                         | 147         | 93               | 54          |
| 5     | Denys          | Amsterdam, NLD        | 3T             | 37.21 ± 9.85    | 33.93                         | 56          | 25               | 31          |
| 6     | van den Heuvel | Amsterdam, NLD I      | 1.5T           | 32.60 ± 8.52    | 33.98                         | 103         | 49               | 54          |
| 7     |                | Amsterdam, NLD II     | 3T             | 38.92 ± 10.65   | 47.44                         | 78          | 36               | 42          |
| 8     | Hoexter        | Sao Paulo, BRA I      | 1.5T           | 29.83 ± 9.30    | 40.23                         | 87          | 37               | 50          |
| 9     | Koch           | Munchen, GER          | 3T             | 30.66 ± 9.04    | 38.36                         | 146         | 71               | 75          |
| 10    | Kwon           | Seoul, KOR I          | 1.5T           | 24.30 ± 4.21    | 61.49                         | 148         | 103              | 45          |
| 11    |                | Seoul, KOR II         | 1.5T           | 26.42 ± 6.21    | 63.95                         | 86          | 45               | 41          |
| 12    |                | Seoul, KOR III        | 3T             | 26.48 ± 7.08    | 61.45                         | 179         | 89               | 90          |
| 13    | Mataix-Cols    | Stockholm, SWE        | 1.5T           | 37.58 ± 11.06   | 40.26                         | 77          | 33               | 44          |
| 14    | Menchon        | Barcelona, ESP        | 1.5T           | 34.19 ± 9.59    | 48.35                         | 182         | 66               | 116         |
| 15    | Nakamae        | Kyoto, JPN I          | 3T             | 31.64 ± 8.66    | 42.47                         | 73          | 39               | 34          |
| 16    |                | Kyoto, JPN II         | 1.5T           | 31.34 ± 8.79    | 48.06                         | 129         | 48               | 81          |
| 17    | Nakao          | Fukuoka, JPN          | 3T             | 37.52 ± 11.13   | 40.98                         | 122         | 41               | 81          |
| 18    | Nurmi          | California, USA       | 3T             | 32.45 ± 11.27   | 52.70                         | 74          | 25               | 49          |
| 19    | Reddy          | Bangalore, IND I      | 1.5T           | 27.33 ± 6.23    | 62.75                         | 51          | 20               | 31          |
| 20    |                | Bangalore, IND II     | 3T             | 28.17 ± 6.13    | 57.64                         | 373         | 170              | 203         |
| 21    | Simpson        | New York, USA         | 3T             | 28.94 ± 7.98    | 51.52                         | 66          | 33               | 33          |
| 22    | Spalletta      | Rome, ITA             | 3T             | 36.58 ± 11.00   | 61.54                         | 208         | 125              | 83          |
| 23    | Stein          | Cape Town, ZAF        | 3T             | 31.02 ± 10.52   | 42.00                         | 50          | 27               | 23          |
| 24    | Tolin          | Conneticut, USA       | 3T             | 40.73 ± 14.29   | 42.37                         | 59          | 32               | 27          |
| 25    | Walitza        | Zurich, CHE I         | 3T             | 31.84 ± 8.48    | 37.14                         | 35          | 18               | 17          |
| 26    | Wang           | Shanghai, CHN         | 3T             | 28.19 ± 8.78    | 53.93                         | 89          | 37               | 52          |
|       |                |                       |                |                 | <i>adult samples combined</i> | <b>2934</b> | <b>1436</b>      | <b>1498</b> |
| 1     | Anorld         | Ontario, CAN          | 3T             | 12.64 ± 2.27    | 58.33                         | 48          | 13               | 35          |
| 2     | Fitzgerald     | Michigan, USA         | 3T             | 13.66 ± 2.75    | 49.23                         | 130         | 60               | 70          |
| 3     | Gruner         | Connecticut, USA      | 3T             | 14.29 ± 2.14    | 55.56                         | 45          | 23               | 22          |

|    |         |                    |      |              |                                   |             |             |             |
|----|---------|--------------------|------|--------------|-----------------------------------|-------------|-------------|-------------|
| 4  | Hoexter | Sao Paulo, BRA II  | 3T   | 12.30 ± 2.43 | 58.93                             | 56          | 28          | 28          |
| 5  | Huysen  | Amsterdam, NLD     | 3T   | 13.64 ± 2.43 | 36.73                             | 49          | 23          | 26          |
| 6  | James   | Oxford, GBR        | 1.5T | 16.46 ± 1.31 | 56.00                             | 25          | 12          | 13          |
| 7  | Lazaro  | Barcelona, ESP I   | 1.5T | 14.62 ± 2.16 | 54.10                             | 61          | 30          | 31          |
| 8  |         | Barcelona, ESP II  | 3T   | 14.57 ± 2.06 | 57.84                             | 102         | 44          | 58          |
| 9  | Nurmi   | California, USA    |      | 12.82 ± 2.73 | 52.63                             | 95          | 36          | 59          |
| 10 | Reddy   | Bangalore, IND III | 3T   | 13.82 ± 2.13 | 55.56                             | 27          | 13          | 14          |
| 11 | Soreni  | Ontario, CAN       | 3T   | 12.32 ± 2.84 | 42.11                             | 57          | 22          | 35          |
| 12 | Walitza | Zurich, CHE II     | 3T   | 15.10 ± 1.47 | 63.89                             | 36          | 20          | 16          |
|    |         |                    |      |              | <i>pediatric samples combined</i> | <b>731</b>  | <b>324</b>  | <b>407</b>  |
| 38 |         |                    |      |              | 54                                | <b>3665</b> | <b>1760</b> | <b>1905</b> |



**TABLE S2: ENIGMA Obsessive-Compulsive Disorder Working Group Clinical characteristics breakdown for participating sites, separately for adult and pediatric samples**

| Study | Study PI       | Site, Country, Sample | Structured interview | % Medicated OCD patients | % antidepressants | % antidepressants + antipsychotics | YBOCS (Mean± SD) | % Comorbid Anxiety | % Comorbid depression | % Comorbid TD | % Comorbid ADHD | % Comorbid ASD |
|-------|----------------|-----------------------|----------------------|--------------------------|-------------------|------------------------------------|------------------|--------------------|-----------------------|---------------|-----------------|----------------|
| 1     | Benedetti      | Milan, ITA            | SCID                 | 63.33                    | 50.00             | 10.00                              | 31.07 ± 5.29     | 0.00               | 3.33                  | 0.00          | not assessed    | not assessed   |
| 2     | Beucke         | Berlin, GER           | SCID                 | 37.00                    | 30.00             | 1.11                               | 20.07 ± 7.06     | 31.11              | 20.00                 | not assessed  | not assessed    | not assessed   |
| 3     | Cheng          | Kunming, CHN I        | SCID                 | 68.18                    | 54.55             | 13.64                              | 31.27 ± 6.21     | 15.91              | 6.82                  | not assessed  | not assessed    | not assessed   |
| 4     |                | Kunming, CHN II       | SCID                 | 68.52                    | 42.59             | 7.41                               | 28.19 ± 6.33     | 16.67              | 3.70                  | not assessed  | not assessed    | not assessed   |
| 5     | Denys          | Amsterdam, NLD        | SCID                 | 64.52                    | 48.39             | 6.45                               | 27.48 ± 6.37     | 3.23               | 32.26                 | 0.00          | 3.23            | 0.00           |
| 6     | van den Heuvel | Amsterdam, NLD I      | SCID                 | 0.00                     | -                 | -                                  | 22.71 ± 6.13     | 25.93              | 14.81                 | not assessed  | not assessed    | not assessed   |
| 7     |                | Amsterdam, NLD II     | SCID                 | 0.00                     | -                 | -                                  | 21.48 ± 6.14     | 35.71              | 21.43                 | 4.76          | not assessed    | not assessed   |
| 8     | Hoexter        | Sao Paulo, BRA I      | SCID                 | 20.00                    | 8.00              | 10.00                              | 27.20 ± 6.09     | 38.00              | 34.00                 | 4.00          | 6.00            | not assessed   |
| 9     | Koch           | Munchen, GER          | SCID                 | 60.00                    | 52.00             | 0.00                               | 20.85 ± 6.08     | not assessed       | not assessed          | not assessed  | 0.00            | not assessed   |
| 10    | Kwon           | Seoul, KOR I          | SCID                 | 24.44                    | 8.89              | 13.33                              | 20.22 ± 6.04     | 0.00               | 0.00                  | not assessed  | 0.00            | 0.00           |
| 11    |                | Seoul, KOR II         | SCID                 | 0.00                     | -                 | -                                  | 23.47 ± 6.65     | 0.00               | 0.00                  | 2.22          | 0.00            | 0.00           |
| 12    |                | Seoul, KOR III        | SCID                 | 2.22                     | unknown           | unknown                            | 26.67 ± 6.61     | 0.00               | 0.00                  | 0.00          | 0.00            | 0.00           |
| 13    | Mataix-Cols    | Stockholm, SWE        | SCID                 | 40.91                    | 40.91             | 0.00                               | 25.86 ± 7.70     | 27.27              | 6.82                  | not assessed  | not assessed    | not assessed   |
| 14    | Menchon        | Barcelona, ESP        | SCID                 | 96.55                    | 75.00             | 24.11                              | 25.50 ± 5.86     | 14.66              | 13.79                 | 15.52         | 7.76            | 0.00           |
| 15    | Nakamae        | Kyoto, JPN I          | SCID                 | 0.00                     | -                 | -                                  | 22.41 ± 6.94     | 23.53              | 8.82                  | 0.00          | 0.00            | 0.00           |
| 16    |                | Kyoto, JPN II         | SCID                 | 48.15                    | 32.10             | 19.75                              | 25.02 ± 6.43     | 3.70               | 0.00                  | 0.00          | 0.00            | 0.00           |
| 17    | Nakao          | Fukuoka, JPN          | SCID                 | 87.65                    | unknown           | unknown                            | 22.48 ± 5.61     | 9.88               | 13.58                 | not assessed  | not assessed    | not assessed   |
| 18    | Nurmi          | California, USA       | SCID                 | 28.57                    | 28.57             | 0.00                               | 24.61 ± 4.33     | 36.73              | 20.41                 | 0.00          | 0.00            | 0.00           |
| 19    | Reddy          | Bangalore, IND I      | MINI                 | 0.00                     | -                 | -                                  | 25.16 ± 8.33     | 5.42               | 14.78                 | 0.00          | not assessed    | not assessed   |
| 20    |                | Bangalore, IND II     | MINI                 | 40.39                    | 33.99             | 5.91                               | 25.87 ± 6.29     | not assessed       | not assessed          | 0.00          | not assessed    | not assessed   |
| 21    | Simpson        | New York, USA         | SCID                 | 0.00                     | -                 | -                                  | 25.55 ± 3.69     | 18.18              | 0.00                  | 0.00          | 0.00            | 0.00           |
| 22    | Spalletta      | Rome, ITA             | SCID                 | 89.16                    | 39.29             | 30.12                              | 23.44 ± 9.00     | 6.02               | 9.64                  | 0.00          | 0.00            | 0.00           |
| 23    | Stein          | Cape Town, ZAF        | SCID                 | 39.13                    | 30.43             | 8.70                               | 23.09 ± 4.14     | 0.00               | 0.00                  | 0.00          | 0.00            | 0.00           |

|    |            |                    |                       |       |         |         |               |              |              |              |              |              |
|----|------------|--------------------|-----------------------|-------|---------|---------|---------------|--------------|--------------|--------------|--------------|--------------|
| 24 | Tolin      | Connecticut, USA   | ADIS                  | 77.78 | 59.26   | 11.11   | 22.74 ± 4.76  | 33.33        | 11.11        | not assessed | not assessed | 0.00         |
| 25 | Walitza    | Zurich, CHE I      | SCID                  | 58.82 | 47.06   | 11.76   | 17.12 ± 9.94  | 35.29        | 17.65        | 0.00         | 0.00         | 0.00         |
| 26 | Wang       | Shanghai, CHN      | MINI                  | 0.00  | -       | -       | 25.42 ± 5.02  | 0.00         | 0.00         | 0.00         | 0.00         | 0.00         |
|    |            |                    |                       |       |         |         |               |              |              |              |              |              |
|    |            |                    |                       |       |         |         |               |              |              |              |              |              |
| 1  | Anorld     | Ontario, CAN       | K-SADS                | 60.00 | 25.71   | 17.14   | 20.92 ± 7.82  | 25.71        | 11.43        | 8.57         | 5.71         | 0.00         |
| 2  | Fitzgerald | Michigan, USA      | K-SADS                | 50.00 | 37.14   | 5.71    | 18.99 ± 8.07  | 38.57        | 1.43         | 18.57        | 8.57         | 0.00         |
| 3  | Gruner     | Connecticut, USA   | K-SADS                | 54.55 | unknown | unknown | 26.68 ± 4.49  | not assessed | not assessed | 0.00         | 27.27        | 4.55         |
| 4  | Hoexter    | Sao Paulo, BRA II  | K-SADS                | 46.43 | unknown | unknown | 26.93 ± 5.43  | 71.43        | 21.43        | 0.00         | 39.29        | not assessed |
| 5  | Huysen     | Amsterdam, NLD     | ADIS (child + parent) | 0.00  | -       | -       | 25.04 ± 5.13  | 50.00        | 23.08        | 7.69         | 7.69         | not assessed |
| 6  | James      | Oxford, GBR        | K-SADS                | 46.15 | 46.15   | 0.00    | 13.85 ± 5.86  | 30.77        | 23.08        | 0.00         | 0.00         | 0.00         |
| 7  | Lazaro     | Barcelona, ESP I   | K-SADS                | 54.84 | 54.84   | 0.00    | 22.23 ± 5.96  | 48.39        | 0.00         | 3.23         | 0.00         | 0.00         |
| 8  |            | Barcelona, ESP II  | K-SADS                | 79.31 | 62.07   | 17.24   | 15.59 ± 7.36  | 3.45         | 0.00         | 3.45         | 5.17         | 0.00         |
| 9  | Nurmi      | California, USA    | K-SADS                | 13.56 | 3.39    | unknown | 24.05 ± 3.98  | 38.98        | 6.78         | 11.86        | 16.95        | 0.00         |
| 10 | Reddy      | Bangalore, IND III | MINI-kid              | 85.71 | 78.57   | 7.14    | 22.07 ± 7.29  | 21.43        | 7.14         | 0.00         | not assessed | not assessed |
| 11 | Soreni     | Ontario, CAN       | K-SADS                | 11.43 | 8.57    | 0.00    | 21.68 ± 5.56  | 31.43        | 11.43        | not assessed | 2.86         | 11.43        |
| 12 | Walitza    | Zurich, CHE II     | K-SADS                | 56.25 | 43.75   | 0.00    | 14.69 ± 10.40 | 31.25        | 0.00         | 12.5         | 12.5         | 0.00         |

<sup>a</sup> Measured with the Yale-Brown Obsessive Compulsive scale (YBOCS)

<sup>b</sup> Measured with the Children's Yale-Brown Obsessive Compulsive scale (C-YBOCS)

Abbreviations: ADHD attention deficit hyperactivity disorder; ASD autism spectrum disorder

**TABLE S3:** Image acquisition parameters per site.

| PI site               | Site, Country, Sample | Scanner vendor and type      | Acquisition parameters                                                          |
|-----------------------|-----------------------|------------------------------|---------------------------------------------------------------------------------|
| <b>Arnold</b>         | Ontario, CAN          | 3T Siemens Tim Trio VB17     | Matrix 192 x 240, 256 slices, Voxel size = 1 mm ISO                             |
| <b>Benedetti</b>      | Milan, ITA            | 3T Philips Gyroscan Intera   | Matrix 256 x 256, 220 slices, Voxel size 1 x 1 x 1 mm                           |
| <b>Beucke</b>         | Berlin, GER           | 1.5T Siemens Sonata          | Matrix 256 x 224, 176 slices, Voxel size = 1mm ISO                              |
| <b>Cheng</b>          | Kunming, CHN I        | 1.5T GE Signa Excite         | Matrix 256 x 256, 172 slices, Voxel size 0.93 x 0.93 x 0.9 mm                   |
|                       | Kunming, CHN II       | 3T Philips Achieva           | Matrix 228 x 228, 230 slices, Voxel size 1.1 x 1.1 x 0.6 mm                     |
| <b>Denys</b>          | Amsterdam, NLD        | 3T Philips Intera            | Matrix 256 x 256, 182/180 slices, Voxel size 1.2 x 0.833 x 0.833/ 1 x 0.5 x 0.5 |
| <b>Fitzgerald</b>     | Michigan, USA         | 3T GE Signa                  | Matrix 256 x 256, 124 slices, Voxel size 1.02 x 1.02 x 1.2 mm                   |
| <b>Gruner</b>         | Connecticut, USA      | 3T GE Signa                  | Matrix 256 x 256, 216 slices, Voxel size 0.976 x 0.976 x 1.0 mm                 |
| <b>van den Heuvel</b> | Amsterdam, NLD I      | 1.5T Siemens Sonata          | Matrix 256 x 160, 160 slices, Voxel size 1 x 1 x 1.5 mm                         |
|                       | Amsterdam, NLD II     | 3T GE Healthcare Signa HDxt  | Matrix 256 x 256, 172 slices, Voxel size 1 x 0.977 x 0.977                      |
| <b>Hoexter</b>        | Sao Paulo, BRA I      | 1.5T GE Signa                | Matrix 256 x 192, 248 slices, Voxel size 0.94 x 0.94 x 0.80 mm                  |
|                       | Sao Paulo, BRA II     | 3T Philips Achieva           | Matrix 240 x 240, 208 slices, Voxel size 1 x 1 x 1 mm                           |
| <b>Huyser</b>         | Amsterdam, NLD        | 3T Philips Intera MR         | Matrix 256 x 256, 182 slices, Voxel size 1 x 1 x 1.2 mm                         |
| <b>James</b>          | Oxford, GBR           | 1.5T Siemens Sonata          | Matrix 256 x 256, 208 slices, Voxel size 1 x 1 x 1 mm                           |
| <b>Koch</b>           | Munchen, GER          | 3T Philips Ingenia           | Matrix 240 x 240, 170 slices, Voxel size 1 x 1 x 1 mm                           |
| <b>Kwon</b>           | Seoul, KOR I          | 1.5T GE Signa                | Matrix 256 x 256, 124 slices, Voxel size 0.82 x 0.82 x 1.5 mm                   |
|                       | Seoul, KOR II         | 1.5T Siemens Avanto          | Matrix 416 x 512, 160-208 slices, Voxel size 0.45 x 0.45 x 0.9 mm               |
|                       | Seoul, KOR III        | 3T Siemens Trio              | Matrix 256 x 256, 208 slices, Voxel size 1 x 0.977 x 0.977 mm                   |
| <b>Lazaro</b>         | Barcelona, ESP I      | 1.5T GE Signa LX             | Matrix 256 x 256, 128 slices, Voxel size 1 x 1 x 1 mm                           |
|                       | Barcelona, ESP II     | 3T Siemens Magnetom Tim      | Matrix 256 x 256, 240 slices, Voxel size 1 x 1 x 1 mm                           |
| <b>Mataix-Cols</b>    | Stockholm, SWE        | 1.5T GE Signa                | Matrix 256 x 256, 124 slices, Voxel size 0.94 x 0.94 x 1.5 mm                   |
|                       |                       | 1.5T GE Signa HDx            | Matrix 256 x 256, 146 slices, Voxel size 1.09 x 1.09 x 1.1 mm                   |
| <b>Menchon</b>        | Barcelona, ESP        | 1.5T GE Signa Excite         | Matrix 256 x 256, 130 slices, Voxel size 1.2 x 1.2 x 1.2 mm                     |
| <b>Nakamae</b>        | Kyoto, JPN I          | 1.5T Philips Gyroscan Intera | Matrix 256 x 256, 130 slices, Voxel size 0.98 x 0.98 x 1.5 mm                   |
|                       | Kyoto, JPN II         | 3T Philips Achieva           | Matrix 256 x 256, 170 slices, Voxel size 1.0 x 1.0 x 1.0 mm                     |
| <b>Nakao</b>          | Fukuoka, JPN          | 3T Philips Achieva TX        | Matrix 240 x 240, 190 slices, Voxel size 1.8 x 1.8 x 1.8 mm                     |

|                  |                    |                     |                                                                 |
|------------------|--------------------|---------------------|-----------------------------------------------------------------|
| <b>Nurmi</b>     | California, USA    | 3T Siemens Trio     | Matrix 256 x 256, 176 slices, Voxel size 1.0 x 1.0 x 1.0 mm     |
| <b>Reddy</b>     | Bangalore, IND I   | 1.5T Siemens Vision | Matrix 256 x 160, 160 slices, Voxel size 0.98 x 0.98 x 1 mm     |
|                  | Bangalore, IND II  | 3T Siemens Skyra    | Matrix 256 x 256, 192 slices, Voxel size 1.0 x 1.0 x 1.0 mm     |
|                  | Bangalore, IND III | 3T Philips Achieva  | Matrix 256 x 256, 165 slices, Voxel size 1.0 x 1.0 x 1.0 mm     |
| <b>Simpson</b>   | New York, USA      | 3T GE Signa         | Matrix 256 x 256, 164 slices, Voxel size 0.976 x 0.976 x 1.0 mm |
| <b>Soreni</b>    | Ontario, CAN       | 3T GE Excite        | Matrix 512 x 512, 148 slices, Voxel size 0.468 x 0.469 x 1 mm   |
| <b>Spalletta</b> | Rome, ITA          | 3T Siemens Allegra  | Matrix 256 x 256, 176 slices, Voxel size 1 x 1 x 1 mm           |
| <b>Stein</b>     | Cape Town, ZAF     | 3T Siemens Allegra  | Matrix 256 x 256, 160 slices, Voxel size 1.3 x 1.0 x 1.0 mm     |
| <b>Tolin</b>     | Connecticut, USA   | 3T Siemens Allegra  | Matrix 64 x 64, 29 slices, Voxel size 1 x 1 x 1 mm              |
| <b>Walitza</b>   | Zurich, CHE I      | 3T Philips Achieva  | Matrix 240 x 240, 160 slices, Voxel size 1 x 1 x 1 mm ISO       |
|                  | Zurich, CHE II     | 3T Philips Achieva  | Matrix 240 x 240, 160 slices, Voxel size 1 x 1 x 1 mm ISO       |
| <b>Wang</b>      | Shanghai, CHN      | 3T Siemens Verio    | Matrix 256 x 256, 192 slices, Voxel size 1.0 x 1.0 x 1.0 mm     |

**TABLE S4:** Full mega-analytic results for cortical thickness of each structure for the adult OCD patients compared with adult healthy controls, controlling for age, sex and scan center.

|                                        | Cohen's d <sup>a</sup><br>(OCD vs HC) | Standard Error | P-value   | FDR P-value | N controls | N patients |
|----------------------------------------|---------------------------------------|----------------|-----------|-------------|------------|------------|
| Right inferior parietal cortex         | -0.140                                | 0.005          | 2.161E-04 | 0.008       | 1379       | 1452       |
| Left inferior parietal cortex          | -0.140                                | 0.005          | 2.283E-04 | 0.008       | 1364       | 1434       |
| Left fusiform gyrus                    | -0.109                                | 0.005          | 0.004     | 0.058       | 1428       | 1488       |
| Right lateral orbitofrontal cortex     | -0.108                                | 0.006          | 0.004     | 0.058       | 1431       | 1497       |
| Left cortical thickness                | -0.106                                | 0.004          | 0.004     | 0.058       | 1435       | 1498       |
| Right medial orbitofrontal cortex      | -0.102                                | 0.007          | 0.006     | 0.067       | 1428       | 1487       |
| Right precuneus                        | -0.101                                | 0.005          | 0.007     | 0.067       | 1429       | 1491       |
| Right middle temporal gyrus            | -0.098                                | 0.006          | 0.009     | 0.067       | 1402       | 1467       |
| Left precuneus                         | -0.097                                | 0.005          | 0.009     | 0.067       | 1426       | 1493       |
| Left lateral orbitofrontal cortex      | -0.096                                | 0.006          | 0.010     | 0.067       | 1433       | 1494       |
| Left rostral middle frontal gyrus      | -0.095                                | 0.005          | 0.011     | 0.069       | 1429       | 1485       |
| Left middle temporal gyrus             | -0.093                                | 0.006          | 0.017     | 0.077       | 1320       | 1367       |
| Right cortical thickness               | -0.092                                | 0.004          | 0.013     | 0.077       | 1435       | 1493       |
| Right rostral middle frontal gyrus     | -0.091                                | 0.005          | 0.015     | 0.077       | 1424       | 1493       |
| Left caudal middle frontal gyrus       | -0.090                                | 0.006          | 0.016     | 0.077       | 1429       | 1478       |
| Right fusiform gyrus                   | -0.089                                | 0.005          | 0.018     | 0.077       | 1428       | 1460       |
| Left inferior temporal cortex gyrus    | -0.087                                | 0.006          | 0.021     | 0.086       | 1383       | 1470       |
| Left medial orbitofrontal cortex       | -0.084                                | 0.007          | 0.024     | 0.092       | 1430       | 1490       |
| Left pars opercularis                  | -0.083                                | 0.006          | 0.027     | 0.098       | 1427       | 1489       |
| Right parahippocampal gyrus            | -0.080                                | 0.010          | 0.032     | 0.111       | 1420       | 1487       |
| Right caudal middle frontal gyrus      | -0.079                                | 0.006          | 0.033     | 0.111       | 1423       | 1485       |
| Left rostral anterior cingulate cortex | -0.074                                | 0.009          | 0.047     | 0.143       | 1415       | 1473       |
| Left lateral occipital cortex          | -0.074                                | 0.005          | 0.046     | 0.143       | 1419       | 1480       |
| Right lateral occipital cortex         | -0.072                                | 0.005          | 0.052     | 0.153       | 1421       | 1479       |
| Left posterior cingulate cortex        | -0.071                                | 0.006          | 0.055     | 0.153       | 1431       | 1492       |
| Left superior frontal gyrus            | -0.069                                | 0.006          | 0.068     | 0.170       | 1413       | 1437       |
| Right pars orbitalis                   | -0.069                                | 0.008          | 0.064     | 0.170       | 1431       | 1495       |
| Left isthmus cingulate cortex          | -0.068                                | 0.008          | 0.066     | 0.170       | 1431       | 1492       |
| Left insula                            | -0.065                                | 0.006          | 0.084     | 0.196       | 1414       | 1471       |
| Right insula                           | -0.065                                | 0.007          | 0.084     | 0.196       | 1415       | 1462       |
| Right pars opercularis                 | -0.062                                | 0.006          | 0.099     | 0.215       | 1418       | 1478       |
| Left entorhinal cortex                 | -0.062                                | 0.014          | 0.110     | 0.229       | 1318       | 1381       |
| Left superior parietal cortex          | -0.062                                | 0.005          | 0.097     | 0.215       | 1417       | 1469       |
| Left banks superior temporal sulcus    | -0.060                                | 0.007          | 0.123     | 0.239       | 1284       | 1357       |

|                                         |        |       |       |       |      |      |
|-----------------------------------------|--------|-------|-------|-------|------|------|
| Left parahippocampal gyrus              | -0.059 | 0.012 | 0.115 | 0.229 | 1424 | 1489 |
| Right inferior temporal cortex gyrus    | -0.059 | 0.006 | 0.115 | 0.229 | 1400 | 1488 |
| Right posterior cingulate cortex        | -0.057 | 0.006 | 0.128 | 0.243 | 1427 | 1492 |
| Right pars triangularis                 | -0.056 | 0.006 | 0.133 | 0.244 | 1423 | 1462 |
| Left supramarginal gyrus                | -0.052 | 0.006 | 0.185 | 0.308 | 1310 | 1363 |
| Right isthmus cingulate cortex          | -0.052 | 0.007 | 0.163 | 0.285 | 1429 | 1496 |
| Left lingual gyrus                      | -0.052 | 0.005 | 0.160 | 0.285 | 1427 | 1490 |
| Left pars orbitalis                     | -0.050 | 0.008 | 0.181 | 0.308 | 1431 | 1489 |
| Left frontal pole                       | -0.048 | 0.012 | 0.194 | 0.315 | 1435 | 1490 |
| Right superior parietal cortex          | -0.047 | 0.005 | 0.215 | 0.341 | 1411 | 1468 |
| Right lingual gyrus                     | -0.044 | 0.005 | 0.240 | 0.373 | 1433 | 1492 |
| Left cuneus                             | -0.042 | 0.005 | 0.258 | 0.393 | 1404 | 1465 |
| Right superior frontal gyrus            | -0.038 | 0.006 | 0.309 | 0.450 | 1410 | 1478 |
| Right caudal anterior cingulate cortex  | -0.038 | 0.009 | 0.305 | 0.450 | 1422 | 1482 |
| Right precentral gyrus                  | -0.037 | 0.005 | 0.328 | 0.469 | 1405 | 1454 |
| Right cuneus                            | -0.033 | 0.005 | 0.374 | 0.503 | 1401 | 1464 |
| Left pars triangularis                  | -0.032 | 0.006 | 0.387 | 0.511 | 1434 | 1491 |
| Right transverse temporal cortex        | -0.024 | 0.008 | 0.516 | 0.657 | 1434 | 1496 |
| Left postcentral gyrus                  | -0.023 | 0.004 | 0.545 | 0.669 | 1403 | 1465 |
| Left precentral gyrus                   | -0.023 | 0.005 | 0.532 | 0.665 | 1408 | 1471 |
| Left paracentral lobule                 | -0.013 | 0.006 | 0.729 | 0.823 | 1430 | 1490 |
| Left superior temporal gyrus            | -0.007 | 0.006 | 0.863 | 0.929 | 1296 | 1331 |
| Left transverse temporal cortex         | -0.004 | 0.008 | 0.912 | 0.939 | 1433 | 1493 |
| Left caudal anterior cingulate cortex   | 0.003  | 0.011 | 0.930 | 0.943 | 1415 | 1473 |
| Right supramarginal gyrus               | 0.003  | 0.005 | 0.946 | 0.946 | 1321 | 1388 |
| Right banks superior temporal sulcus    | 0.005  | 0.007 | 0.893 | 0.933 | 1321 | 1390 |
| Right rostral anterior cingulate cortex | 0.005  | 0.009 | 0.892 | 0.933 | 1413 | 1474 |
| Right paracentral lobule                | 0.009  | 0.006 | 0.811 | 0.886 | 1432 | 1493 |
| Left pericalcarine gyrus                | 0.011  | 0.005 | 0.768 | 0.854 | 1406 | 1482 |
| Right entorhinal cortex                 | 0.014  | 0.016 | 0.719 | 0.823 | 1244 | 1334 |
| Right superior temporal gyrus           | 0.014  | 0.006 | 0.727 | 0.823 | 1316 | 1380 |
| Right temporal pole                     | 0.015  | 0.014 | 0.687 | 0.815 | 1430 | 1463 |
| Right frontal pole                      | 0.021  | 0.012 | 0.576 | 0.695 | 1434 | 1495 |
| Right pericalcarine gyrus               | 0.025  | 0.005 | 0.513 | 0.657 | 1409 | 1477 |
| Left temporal pole                      | 0.034  | 0.013 | 0.354 | 0.486 | 1435 | 1493 |
| Right postcentral gyrus                 | 0.036  | 0.005 | 0.336 | 0.470 | 1414 | 1473 |

**TABLE S5:** Full mega-analytic results for surface area of each structure for the adult OCD patients compared with adult healthy controls, controlling for age, sex, scan center and ICV.

|                                                | <b>Cohen's d<sup>a</sup><br/>(OCD vs HC)</b> | <b>Standard Error</b> | <b>P-value</b> | <b>FDR P-value</b> | <b>N controls</b> | <b>N patients</b> |
|------------------------------------------------|----------------------------------------------|-----------------------|----------------|--------------------|-------------------|-------------------|
| <b>Left transverse temporal cortex</b>         | -0.164                                       | 2.653                 | 1.071E-05      | 0.001              | 1431              | 1492              |
| <b>Right superior temporal gyrus</b>           | -0.110                                       | 11.489                | 0.005          | 0.120              | 1314              | 1379              |
| <b>Right transverse temporal cortex</b>        | -0.104                                       | 1.958                 | 0.005          | 0.120              | 1432              | 1495              |
| <b>Left pars triangularis</b>                  | -0.095                                       | 6.525                 | 0.011          | 0.188              | 1432              | 1490              |
| <b>Left pars opercularis</b>                   | -0.087                                       | 9.133                 | 0.020          | 0.275              | 1425              | 1488              |
| <b>Right supramarginal gyrus</b>               | -0.079                                       | 16.193                | 0.042          | 0.473              | 1319              | 1387              |
| <b>Left superior temporal gyrus</b>            | -0.071                                       | 13.374                | 0.072          | 0.543              | 1294              | 1330              |
| <b>Left postcentral gyrus</b>                  | -0.071                                       | 14.638                | 0.059          | 0.543              | 1401              | 1464              |
| <b>Right posterior cingulate cortex</b>        | -0.069                                       | 5.930                 | 0.066          | 0.543              | 1425              | 1491              |
| <b>Right superior frontal gyrus</b>            | -0.061                                       | 21.881                | 0.104          | 0.673              | 1408              | 1477              |
| <b>Right rostral anterior cingulate cortex</b> | -0.060                                       | 4.450                 | 0.109          | 0.673              | 1411              | 1474              |
| <b>Left superior frontal gyrus</b>             | -0.058                                       | 21.708                | 0.126          | 0.716              | 1411              | 1436              |
| <b>Left surface area</b>                       | -0.057                                       | 172.323               | 0.123          | 1.000              | 1433              | 1497              |
| <b>Left supramarginal gyrus</b>                | -0.055                                       | 17.287                | 0.161          | 0.726              | 1308              | 1362              |
| <b>Left superior parietal cortex</b>           | -0.049                                       | 19.552                | 0.194          | 0.726              | 1415              | 1468              |
| <b>Left insula</b>                             | -0.049                                       | 7.277                 | 0.187          | 0.726              | 1412              | 1470              |
| <b>Right caudal anterior cingulate cortex</b>  | -0.048                                       | 5.283                 | 0.203          | 0.726              | 1420              | 1481              |
| <b>Left lateral orbitofrontal cortex</b>       | -0.048                                       | 8.563                 | 0.193          | 0.726              | 1431              | 1493              |
| <b>Left lateral occipital cortex</b>           | -0.045                                       | 17.391                | 0.232          | 0.787              | 1417              | 1479              |
| <b>Left caudal middle frontal gyrus</b>        | -0.040                                       | 11.981                | 0.287          | 0.878              | 1427              | 1477              |
| <b>Right pars opercularis</b>                  | -0.039                                       | 7.758                 | 0.299          | 0.878              | 1416              | 1478              |
| <b>Right surface area</b>                      | -0.036                                       | 174.066               | 0.335          | 1.000              | 1434              | 1495              |
| <b>Left frontal pole</b>                       | -0.034                                       | 1.225                 | 0.364          | 0.878              | 1433              | 1489              |
| <b>Right superior parietal cortex</b>          | -0.034                                       | 19.048                | 0.366          | 0.878              | 1409              | 1467              |
| <b>Right pericalcarine gyrus</b>               | -0.034                                       | 8.033                 | 0.363          | 0.878              | 1407              | 1476              |

|                                        |        |        |       |       |      |      |
|----------------------------------------|--------|--------|-------|-------|------|------|
| Left pars orbitalis                    | -0.032 | 2.667  | 0.395 | 0.878 | 1429 | 1488 |
| Right pars triangularis                | -0.032 | 8.146  | 0.387 | 0.878 | 1421 | 1461 |
| Right middle temporal gyrus            | -0.032 | 11.975 | 0.387 | 0.878 | 1401 | 1467 |
| Right isthmus cingulate cortex         | -0.030 | 4.964  | 0.415 | 0.878 | 1427 | 1495 |
| Left lingual gyrus                     | -0.026 | 13.305 | 0.479 | 0.878 | 1425 | 1489 |
| Left posterior cingulate cortex        | -0.025 | 5.628  | 0.494 | 0.878 | 1429 | 1491 |
| Right lateral occipital cortex         | -0.024 | 17.907 | 0.526 | 0.878 | 1419 | 1478 |
| Right insula                           | -0.024 | 7.970  | 0.523 | 0.878 | 1413 | 1461 |
| Left cuneus                            | -0.023 | 6.747  | 0.536 | 0.878 | 1402 | 1464 |
| Left inferior temporal cortex gyrus    | -0.023 | 14.447 | 0.536 | 0.878 | 1382 | 1469 |
| Right entorhinal cortex                | -0.021 | 4.552  | 0.595 | 0.894 | 1242 | 1333 |
| Left isthmus cingulate cortex          | -0.020 | 5.553  | 0.593 | 0.894 | 1429 | 1491 |
| Right cuneus                           | -0.017 | 6.643  | 0.658 | 0.894 | 1399 | 1463 |
| Left paracentral lobule                | -0.016 | 5.992  | 0.672 | 0.896 | 1428 | 1489 |
| Left pericalcarine gyrus               | -0.014 | 7.519  | 0.713 | 0.927 | 1404 | 1481 |
| Left entorhinal cortex                 | -0.013 | 2.827  | 0.742 | 0.927 | 1316 | 1381 |
| Right postcentral gyrus                | -0.013 | 14.127 | 0.725 | 0.927 | 1412 | 1472 |
| Right lingual gyrus                    | -0.011 | 12.633 | 0.760 | 0.927 | 1431 | 1491 |
| Right precuneus                        | -0.008 | 14.302 | 0.828 | 0.960 | 1427 | 1490 |
| Right precentral gyrus                 | -0.007 | 16.586 | 0.849 | 0.962 | 1403 | 1453 |
| Right fusiform gyrus                   | -0.005 | 12.499 | 0.901 | 0.982 | 1426 | 1459 |
| Right caudal middle frontal gyrus      | -0.005 | 12.159 | 0.885 | 0.982 | 1421 | 1484 |
| Left rostral anterior cingulate cortex | -0.004 | 4.868  | 0.910 | 0.982 | 1413 | 1472 |
| Left medial orbitofrontal cortex       | -0.003 | 7.493  | 0.938 | 0.984 | 1428 | 1489 |
| Left temporal pole                     | -0.001 | 2.157  | 0.988 | 0.991 | 1434 | 1492 |
| Left rostral middle frontal gyrus      | <0.001 | 20.755 | 0.991 | 0.991 | 1427 | 1484 |
| Left precentral gyrus                  | 0.002  | 15.082 | 0.951 | 0.984 | 1406 | 1470 |
| Right pars orbitalis                   | 0.002  | 3.308  | 0.955 | 0.984 | 1429 | 1494 |
| Left middle temporal gyrus             | 0.008  | 12.096 | 0.830 | 0.960 | 1319 | 1366 |



|                                       |       |        |       |       |      |      |
|---------------------------------------|-------|--------|-------|-------|------|------|
| Right lateral orbitofrontal cortex    | 0.008 | 9.303  | 0.833 | 0.960 | 1429 | 1496 |
| Right rostral middle frontal gyrus    | 0.011 | 21.232 | 0.763 | 0.927 | 1422 | 1492 |
| Right parahippocampal gyrus           | 0.017 | 3.394  | 0.640 | 0.894 | 1418 | 1486 |
| Left caudal anterior cingulate cortex | 0.017 | 4.565  | 0.646 | 0.894 | 1413 | 1472 |
| Right frontal pole                    | 0.017 | 1.555  | 0.649 | 0.894 | 1432 | 1494 |
| Right inferior temporal cortex gyrus  | 0.018 | 13.800 | 0.629 | 0.894 | 1399 | 1487 |
| Left banks superior temporal sulcus   | 0.022 | 5.722  | 0.580 | 0.894 | 1282 | 1356 |
| Right temporal pole                   | 0.023 | 2.203  | 0.542 | 0.878 | 1428 | 1462 |
| Right banks superior temporal sulcus  | 0.027 | 4.732  | 0.478 | 0.878 | 1319 | 1389 |
| Left fusiform gyrus                   | 0.028 | 12.950 | 0.451 | 0.878 | 1426 | 1487 |
| Right paracentral lobule              | 0.028 | 6.999  | 0.460 | 0.878 | 1430 | 1492 |
| Right medial orbitofrontal cortex     | 0.030 | 6.213  | 0.421 | 0.878 | 1426 | 1487 |
| Left precuneus                        | 0.034 | 13.018 | 0.357 | 0.878 | 1424 | 1492 |
| Left inferior parietal cortex         | 0.036 | 19.456 | 0.346 | 0.878 | 1363 | 1433 |
| Left parahippocampal gyrus            | 0.051 | 3.563  | 0.175 | 0.726 | 1422 | 1488 |
| Right inferior parietal cortex        | 0.055 | 21.798 | 0.148 | 0.726 | 1377 | 1451 |

**TABLE S6:** Full mega-analytic results for cortical thickness of each structure for the pediatric OCD patients compared with pediatric healthy controls, controlling for age, sex and scan center.

|                                             | <b>Cohen's d<sup>a</sup><br/>(OCD vs HC)</b> | <b>Standard Error</b> | <b>P-value</b> | <b>FDR P-value</b> | <b>N controls</b> | <b>N patients</b> |
|---------------------------------------------|----------------------------------------------|-----------------------|----------------|--------------------|-------------------|-------------------|
| <b>Left inferior parietal cortex</b>        | -0.305                                       | 0.012                 | 9.603E-05      | 0.007              | 301               | 385               |
| <b>Right superior parietal cortex</b>       | -0.269                                       | 0.011                 | <0.001         | 0.015              | 320               | 401               |
| <b>Left lateral occipital cortex</b>        | -0.256                                       | 0.010                 | 0.001          | 0.018              | 319               | 402               |
| <b>Left superior parietal cortex</b>        | -0.241                                       | 0.011                 | 0.002          | 0.027              | 317               | 402               |
| <b>Right inferior parietal cortex</b>       | -0.225                                       | 0.012                 | 0.004          | 0.050              | 309               | 392               |
| <b>Left precuneus</b>                       | -0.207                                       | 0.011                 | 0.006          | 0.075              | 320               | 403               |
| <b>Left cuneus</b>                          | -0.184                                       | 0.011                 | 0.015          | 0.154              | 320               | 403               |
| <b>Right lateral occipital cortex</b>       | -0.163                                       | 0.010                 | 0.032          | 0.257              | 321               | 401               |
| <b>Left cortical thickness</b>              | -0.161                                       | 0.008                 | 0.033          | 0.257              | 324               | 407               |
| <b>Right cuneus</b>                         | -0.157                                       | 0.012                 | 0.038          | 0.269              | 323               | 401               |
| <b>Left supramarginal gyrus</b>             | -0.152                                       | 0.012                 | 0.053          | 0.297              | 299               | 383               |
| <b>Right precuneus</b>                      | -0.152                                       | 0.011                 | 0.044          | 0.281              | 324               | 400               |
| <b>Right cortical thickness</b>             | -0.144                                       | 0.008                 | 0.055          | 0.297              | 324               | 407               |
| <b>Left pericalcarine gyrus</b>             | -0.143                                       | 0.011                 | 0.059          | 0.297              | 320               | 402               |
| <b>Right caudal middle frontal gyrus</b>    | -0.133                                       | 0.014                 | 0.079          | 0.352              | 318               | 399               |
| <b>Left posterior cingulate cortex</b>      | -0.132                                       | 0.014                 | 0.083          | 0.352              | 320               | 401               |
| <b>Left banks superior temporal sulcus</b>  | -0.130                                       | 0.016                 | 0.100          | 0.372              | 297               | 370               |
| <b>Right pericalcarine gyrus</b>            | -0.130                                       | 0.011                 | 0.086          | 0.352              | 323               | 401               |
| <b>Left isthmus cingulate cortex</b>        | -0.124                                       | 0.017                 | 0.101          | 0.372              | 322               | 399               |
| <b>Left paracentral lobule</b>              | -0.110                                       | 0.014                 | 0.147          | 0.515              | 321               | 403               |
| <b>Right banks superior temporal sulcus</b> | -0.110                                       | 0.016                 | 0.158          | 0.527              | 298               | 384               |
| <b>Right posterior cingulate cortex</b>     | -0.101                                       | 0.013                 | 0.184          | 0.545              | 322               | 400               |
| <b>Left precentral gyrus</b>                | -0.099                                       | 0.011                 | 0.195          | 0.545              | 313               | 397               |
| <b>Left transverse temporal cortex</b>      | -0.098                                       | 0.017                 | 0.193          | 0.545              | 322               | 404               |
| <b>Right postcentral gyrus</b>              | -0.096                                       | 0.010                 | 0.214          | 0.554              | 309               | 393               |

|                                         |        |       |       |       |     |     |
|-----------------------------------------|--------|-------|-------|-------|-----|-----|
| Left fusiform gyrus                     | -0.092 | 0.011 | 0.230 | 0.575 | 314 | 399 |
| Right insula                            | -0.089 | 0.015 | 0.249 | 0.594 | 312 | 389 |
| Left inferior temporal cortex gyrus     | -0.085 | 0.014 | 0.265 | 0.594 | 315 | 398 |
| Left postcentral gyrus                  | -0.085 | 0.010 | 0.267 | 0.594 | 312 | 391 |
| Left middle temporal gyrus              | -0.083 | 0.015 | 0.283 | 0.594 | 309 | 389 |
| Right inferior temporal cortex gyrus    | -0.083 | 0.014 | 0.275 | 0.594 | 320 | 395 |
| Right precentral gyrus                  | -0.079 | 0.012 | 0.300 | 0.594 | 312 | 395 |
| Right middle temporal gyrus             | -0.078 | 0.014 | 0.315 | 0.594 | 307 | 391 |
| Right rostral middle frontal gyrus      | -0.076 | 0.012 | 0.319 | 0.594 | 317 | 404 |
| Left medial orbitofrontal cortex        | -0.075 | 0.015 | 0.325 | 0.594 | 320 | 400 |
| Right supramarginal gyrus               | -0.073 | 0.012 | 0.346 | 0.594 | 303 | 387 |
| Right rostral anterior cingulate cortex | -0.072 | 0.022 | 0.347 | 0.594 | 310 | 398 |
| Right paracentral lobule                | -0.071 | 0.013 | 0.348 | 0.594 | 323 | 403 |
| Left lingual gyrus                      | -0.068 | 0.010 | 0.370 | 0.601 | 321 | 403 |
| Right parahippocampal gyrus             | -0.068 | 0.022 | 0.371 | 0.601 | 317 | 394 |
| Right fusiform gyrus                    | -0.067 | 0.011 | 0.378 | 0.601 | 314 | 398 |
| Left pars opercularis                   | -0.063 | 0.013 | 0.405 | 0.614 | 319 | 399 |
| Right superior frontal gyrus            | -0.061 | 0.014 | 0.430 | 0.614 | 310 | 396 |
| Left caudal middle frontal gyrus        | -0.060 | 0.013 | 0.428 | 0.614 | 321 | 405 |
| Left superior frontal gyrus             | -0.060 | 0.013 | 0.428 | 0.614 | 316 | 397 |
| Right pars triangularis                 | -0.056 | 0.014 | 0.457 | 0.640 | 321 | 402 |
| Right pars orbitalis                    | -0.047 | 0.019 | 0.537 | 0.737 | 322 | 404 |
| Left entorhinal cortex                  | -0.045 | 0.030 | 0.572 | 0.747 | 287 | 370 |
| Left frontal pole                       | -0.044 | 0.028 | 0.556 | 0.747 | 323 | 405 |
| Left parahippocampal gyrus              | -0.039 | 0.024 | 0.612 | 0.749 | 317 | 395 |
| Right pars opercularis                  | -0.039 | 0.014 | 0.610 | 0.749 | 316 | 400 |
| Right superior temporal gyrus           | -0.038 | 0.014 | 0.624 | 0.749 | 298 | 388 |
| Right isthmus cingulate cortex          | -0.036 | 0.017 | 0.631 | 0.749 | 322 | 399 |
| Left rostral middle frontal gyrus       | -0.026 | 0.012 | 0.731 | 0.839 | 321 | 406 |

|                                        |        |       |       |       |     |     |
|----------------------------------------|--------|-------|-------|-------|-----|-----|
| Right transverse temporal cortex       | -0.022 | 0.018 | 0.767 | 0.865 | 320 | 406 |
| Right entorhinal cortex                | -0.019 | 0.031 | 0.818 | 0.888 | 276 | 349 |
| Left pars orbitalis                    | -0.017 | 0.020 | 0.824 | 0.888 | 322 | 403 |
| Left pars triangularis                 | -0.009 | 0.014 | 0.906 | 0.947 | 321 | 403 |
| Left insula                            | -0.004 | 0.013 | 0.953 | 0.967 | 315 | 389 |
| Left caudal anterior cingulate cortex  | 0.002  | 0.022 | 0.983 | 0.983 | 316 | 396 |
| Right lingual gyrus                    | 0.006  | 0.011 | 0.936 | 0.963 | 323 | 406 |
| Left superior temporal gyrus           | 0.012  | 0.014 | 0.873 | 0.926 | 304 | 381 |
| Right temporal pole                    | 0.021  | 0.033 | 0.778 | 0.865 | 322 | 398 |
| Left temporal pole                     | 0.029  | 0.032 | 0.707 | 0.824 | 321 | 399 |
| Right lateral orbitofrontal cortex     | 0.040  | 0.014 | 0.597 | 0.749 | 322 | 405 |
| Right frontal pole                     | 0.042  | 0.028 | 0.576 | 0.747 | 319 | 406 |
| Right caudal anterior cingulate cortex | 0.065  | 0.021 | 0.398 | 0.614 | 310 | 401 |
| Left rostral anterior cingulate cortex | 0.077  | 0.021 | 0.316 | 0.594 | 316 | 395 |
| Right medial orbitofrontal cortex      | 0.096  | 0.016 | 0.208 | 0.554 | 319 | 397 |
| Left lateral orbitofrontal cortex      | 0.099  | 0.014 | 0.190 | 0.545 | 324 | 406 |

**TABLE S7:** Full mega-analytic results for surface area of each structure for the pediatric OCD patients compared with pediatric healthy controls, controlling for age, sex, scan center and ICV.

|                                               | <b>Cohen's d<sup>a</sup><br/>(OCD vs HC)</b> | <b>Standard Error</b> | <b>P-value</b> | <b>FDR P-value</b> | <b>N controls</b> | <b>N patients</b> |
|-----------------------------------------------|----------------------------------------------|-----------------------|----------------|--------------------|-------------------|-------------------|
| <b>Right medial orbitofrontal cortex</b>      | -0.252                                       | 14.237                | 0.001          | 0.065              | 319               | 396               |
| <b>Left posterior cingulate cortex</b>        | -0.230                                       | 12.640                | 0.002          | 0.075              | 320               | 400               |
| <b>Right paracentral lobule</b>               | -0.223                                       | 15.262                | 0.003          | 0.075              | 323               | 402               |
| <b>Left inferior parietal cortex</b>          | -0.188                                       | 39.699                | 0.016          | 0.178              | 301               | 384               |
| <b>Left medial orbitofrontal cortex</b>       | -0.188                                       | 16.601                | 0.013          | 0.178              | 320               | 399               |
| <b>Right superior frontal gyrus</b>           | -0.185                                       | 49.874                | 0.016          | 0.178              | 310               | 395               |
| <b>Left lateral orbitofrontal cortex</b>      | -0.178                                       | 20.676                | 0.018          | 0.178              | 324               | 405               |
| <b>Left paracentral lobule</b>                | -0.171                                       | 13.115                | 0.024          | 0.193              | 321               | 402               |
| <b>Left rostral middle frontal gyrus</b>      | -0.168                                       | 46.435                | 0.026          | 0.193              | 321               | 405               |
| <b>Right posterior cingulate cortex</b>       | -0.166                                       | 12.250                | 0.028          | 0.193              | 322               | 399               |
| <b>Right rostral middle frontal gyrus</b>     | -0.155                                       | 48.719                | 0.042          | 0.260              | 317               | 403               |
| <b>Left superior frontal gyrus</b>            | -0.145                                       | 46.383                | 0.057          | 0.324              | 316               | 396               |
| <b>Right fusiform gyrus</b>                   | -0.132                                       | 26.069                | 0.085          | 0.363              | 314               | 397               |
| <b>Left postcentral gyrus</b>                 | -0.129                                       | 31.244                | 0.093          | 0.363              | 312               | 390               |
| <b>Right cuneus</b>                           | -0.126                                       | 15.249                | 0.096          | 0.363              | 323               | 400               |
| <b>Left caudal anterior cingulate cortex</b>  | -0.118                                       | 9.887                 | 0.123          | 0.414              | 316               | 395               |
| <b>Left rostral anterior cingulate cortex</b> | -0.118                                       | 10.890                | 0.122          | 0.414              | 316               | 394               |
| <b>Right pars orbitalis</b>                   | -0.115                                       | 7.266                 | 0.130          | 0.414              | 322               | 403               |
| <b>Right surface area</b>                     | -0.115                                       | 383.996               | 0.128          | 1.000              | 324               | 406               |
| <b>Left pars orbitalis</b>                    | -0.113                                       | 5.994                 | 0.134          | 0.414              | 322               | 402               |
| <b>Left insula</b>                            | -0.107                                       | 15.643                | 0.162          | 0.479              | 315               | 388               |
| <b>Left middle temporal gyrus</b>             | -0.102                                       | 24.564                | 0.187          | 0.484              | 309               | 388               |
| <b>Right lateral occipital cortex</b>         | -0.102                                       | 38.143                | 0.177          | 0.484              | 321               | 400               |
| <b>Right pars triangularis</b>                | -0.099                                       | 16.999                | 0.192          | 0.484              | 321               | 401               |
| <b>Right lateral orbitofrontal cortex</b>     | -0.099                                       | 21.195                | 0.189          | 0.484              | 322               | 404               |

|                                         |        |         |       |       |     |     |
|-----------------------------------------|--------|---------|-------|-------|-----|-----|
| Left surface area                       | -0.097 | 377.027 | 0.198 | 1.000 | 324 | 406 |
| Left cuneus                             | -0.095 | 14.400  | 0.210 | 0.507 | 320 | 402 |
| Left pericalcarine gyrus                | -0.094 | 16.670  | 0.216 | 0.507 | 320 | 401 |
| Right superior parietal cortex          | -0.083 | 41.807  | 0.275 | 0.623 | 320 | 400 |
| Left precuneus                          | -0.080 | 29.526  | 0.294 | 0.644 | 320 | 402 |
| Right inferior parietal cortex          | -0.072 | 46.695  | 0.352 | 0.725 | 309 | 391 |
| Left pars opercularis                   | -0.065 | 18.873  | 0.393 | 0.752 | 319 | 398 |
| Left superior parietal cortex           | -0.065 | 42.003  | 0.391 | 0.752 | 317 | 401 |
| Right lingual gyrus                     | -0.064 | 29.174  | 0.398 | 0.752 | 323 | 405 |
| Right pericalcarine gyrus               | -0.052 | 17.700  | 0.496 | 0.890 | 323 | 400 |
| Right parahippocampal gyrus             | -0.045 | 7.552   | 0.552 | 0.904 | 317 | 393 |
| Right postcentral gyrus                 | -0.042 | 30.293  | 0.586 | 0.904 | 309 | 392 |
| Left lingual gyrus                      | -0.040 | 29.503  | 0.600 | 0.904 | 321 | 402 |
| Right middle temporal gyrus             | -0.038 | 27.178  | 0.618 | 0.904 | 307 | 390 |
| Right superior temporal gyrus           | -0.034 | 25.066  | 0.663 | 0.904 | 298 | 387 |
| Right pars opercularis                  | -0.034 | 15.820  | 0.653 | 0.904 | 316 | 399 |
| Right supramarginal gyrus               | -0.033 | 35.656  | 0.672 | 0.904 | 303 | 386 |
| Right insula                            | -0.031 | 16.273  | 0.685 | 0.904 | 312 | 388 |
| Left precentral gyrus                   | -0.029 | 31.244  | 0.704 | 0.904 | 313 | 396 |
| Left banks superior temporal sulcus     | -0.029 | 12.956  | 0.711 | 0.904 | 297 | 369 |
| Left fusiform gyrus                     | -0.027 | 27.440  | 0.722 | 0.904 | 314 | 398 |
| Left caudal middle frontal gyrus        | -0.016 | 26.515  | 0.832 | 0.925 | 321 | 404 |
| Left frontal pole                       | -0.014 | 2.710   | 0.857 | 0.925 | 323 | 404 |
| Right precuneus                         | -0.007 | 31.086  | 0.924 | 0.952 | 324 | 399 |
| Left superior temporal gyrus            | -0.006 | 27.394  | 0.943 | 0.958 | 304 | 380 |
| Right caudal anterior cingulate cortex  | -0.002 | 10.340  | 0.977 | 0.977 | 310 | 400 |
| Right rostral anterior cingulate cortex | 0.010  | 9.238   | 0.892 | 0.938 | 310 | 397 |
| Right temporal pole                     | 0.010  | 4.670   | 0.896 | 0.938 | 322 | 397 |
| Left lateral occipital cortex           | 0.015  | 36.991  | 0.844 | 0.925 | 319 | 401 |

|                                      |       |        |       |       |     |     |
|--------------------------------------|-------|--------|-------|-------|-----|-----|
| Right inferior temporal cortex gyrus | 0.017 | 30.328 | 0.819 | 0.925 | 320 | 394 |
| Left entorhinal cortex               | 0.017 | 6.003  | 0.827 | 0.925 | 287 | 369 |
| Right precentral gyrus               | 0.018 | 30.732 | 0.819 | 0.925 | 312 | 394 |
| Right caudal middle frontal gyrus    | 0.019 | 25.807 | 0.799 | 0.925 | 318 | 398 |
| Left parahippocampal gyrus           | 0.022 | 7.946  | 0.769 | 0.925 | 317 | 394 |
| Right banks superior temporal sulcus | 0.027 | 10.036 | 0.731 | 0.904 | 298 | 383 |
| Left transverse temporal cortex      | 0.033 | 5.068  | 0.664 | 0.904 | 322 | 403 |
| Left pars triangularis               | 0.040 | 13.893 | 0.596 | 0.904 | 321 | 402 |
| Left inferior temporal cortex gyrus  | 0.040 | 32.639 | 0.601 | 0.904 | 315 | 397 |
| Right isthmus cingulate cortex       | 0.040 | 10.204 | 0.602 | 0.904 | 322 | 398 |
| Right transverse temporal cortex     | 0.048 | 4.252  | 0.527 | 0.904 | 320 | 405 |
| Left supramarginal gyrus             | 0.053 | 36.240 | 0.497 | 0.890 | 299 | 382 |
| Right entorhinal cortex              | 0.076 | 6.186  | 0.352 | 0.725 | 276 | 348 |
| Left isthmus cingulate cortex        | 0.129 | 11.488 | 0.090 | 0.363 | 322 | 399 |
| Right frontal pole                   | 0.131 | 3.344  | 0.083 | 0.363 | 319 | 405 |
| Left temporal pole                   | 0.131 | 4.884  | 0.085 | 0.363 | 321 | 398 |

**TABLE S8a:** Full mega-analytic results for cortical thickness of each structure for the adult medicated OCD patients compared with adult healthy controls, controlling for age, sex and scan center.

|                                             | <b>Cohen's d<sup>a</sup><br/>(Med vs HC)</b> | <b>Standard Error</b> | <b>P-value</b> | <b>FDR P-value</b> | <b>N controls</b> | <b>N patients</b> |
|---------------------------------------------|----------------------------------------------|-----------------------|----------------|--------------------|-------------------|-------------------|
| <b>Left cortical thickness</b>              | -0.257                                       | 0.005                 | 7.909E-08      | 5.536E-06          | 1435              | 647               |
| <b>Right cortical thickness</b>             | -0.241                                       | 0.005                 | 4.731E-07      | 1.656E-05          | 1435              | 644               |
| <b>Right caudal middle frontal gyrus</b>    | -0.235                                       | 0.008                 | 1.001E-06      | 2.336E-05          | 1423              | 644               |
| <b>Left superior frontal gyrus</b>          | -0.231                                       | 0.008                 | 2.146E-06      | 3.004E-05          | 1413              | 615               |
| <b>Left fusiform gyrus</b>                  | -0.227                                       | 0.008                 | 2.102E-06      | 3.004E-05          | 1428              | 645               |
| <b>Left caudal middle frontal gyrus</b>     | -0.224                                       | 0.008                 | 3.016E-06      | 3.519E-05          | 1429              | 643               |
| <b>Left rostral middle frontal gyrus</b>    | -0.223                                       | 0.007                 | 3.668E-06      | 3.668E-05          | 1429              | 638               |
| <b>Left inferior parietal cortex</b>        | -0.222                                       | 0.007                 | 5.804E-06      | 4.514E-05          | 1364              | 616               |
| <b>Right inferior parietal cortex</b>       | -0.219                                       | 0.007                 | 7.313E-06      | 4.654E-05          | 1379              | 623               |
| <b>Right middle temporal gyrus</b>          | -0.218                                       | 0.008                 | 7.202E-06      | 4.654E-05          | 1402              | 629               |
| <b>Right lateral orbitofrontal cortex</b>   | -0.217                                       | 0.009                 | 5.619E-06      | 4.514E-05          | 1431              | 647               |
| <b>Left middle temporal gyrus</b>           | -0.215                                       | 0.009                 | 1.901E-05      | 1.023E-04          | 1320              | 581               |
| <b>Right fusiform gyrus</b>                 | -0.211                                       | 0.008                 | 1.232E-05      | 7.186E-05          | 1428              | 632               |
| <b>Right precuneus</b>                      | -0.204                                       | 0.007                 | 2.070E-05      | 1.035E-04          | 1429              | 643               |
| <b>Left inferior temporal cortex gyrus</b>  | -0.202                                       | 0.009                 | 3.097E-05      | 1.376E-04          | 1383              | 628               |
| <b>Right medial orbitofrontal cortex</b>    | -0.200                                       | 0.010                 | 3.145E-05      | 1.376E-04          | 1428              | 642               |
| <b>Right superior frontal gyrus</b>         | -0.197                                       | 0.008                 | 4.410E-05      | 1.715E-04          | 1410              | 639               |
| <b>Right inferior temporal cortex gyrus</b> | -0.197                                       | 0.009                 | 4.371E-05      | 1.715E-04          | 1400              | 639               |
| <b>Left lateral orbitofrontal cortex</b>    | -0.194                                       | 0.009                 | 4.925E-05      | 1.815E-04          | 1433              | 643               |
| <b>Left pars opercularis</b>                | -0.189                                       | 0.008                 | 8.051E-05      | 2.818E-04          | 1427              | 642               |
| <b>Right rostral middle frontal gyrus</b>   | -0.185                                       | 0.007                 | 1.139E-04      | 3.798E-04          | 1424              | 645               |
| <b>Left lingual gyrus</b>                   | -0.184                                       | 0.007                 | 1.242E-04      | 3.952E-04          | 1427              | 642               |
| <b>Right pars triangularis</b>              | -0.183                                       | 0.008                 | 1.517E-04      | 4.424E-04          | 1423              | 633               |
| <b>Right pars orbitalis</b>                 | -0.182                                       | 0.011                 | 1.444E-04      | 4.396E-04          | 1431              | 647               |



|                                     |        |       |           |           |      |     |
|-------------------------------------|--------|-------|-----------|-----------|------|-----|
| Left isthmus cingulate cortex       | -0.181 | 0.011 | 1.611E-04 | 4.511E-04 | 1431 | 643 |
| Left medial orbitofrontal cortex    | -0.179 | 0.009 | 1.912E-04 | 0.001     | 1430 | 642 |
| Left precuneus                      | -0.175 | 0.007 | 2.700E-04 | 0.001     | 1426 | 644 |
| Right posterior cingulate cortex    | -0.168 | 0.009 | 4.299E-04 | 0.001     | 1427 | 646 |
| Left supramarginal gyrus            | -0.155 | 0.008 | 0.002     | 0.005     | 1310 | 594 |
| Left lateral occipital cortex       | -0.148 | 0.007 | 0.002     | 0.005     | 1419 | 637 |
| Right precentral gyrus              | -0.144 | 0.007 | 0.003     | 0.006     | 1405 | 630 |
| Left banks superior temporal sulcus | -0.144 | 0.010 | 0.004     | 0.009     | 1284 | 573 |
| Left frontal pole                   | -0.143 | 0.016 | 0.003     | 0.006     | 1435 | 644 |
| Left posterior cingulate cortex     | -0.140 | 0.008 | 0.003     | 0.007     | 1431 | 642 |
| Right pars opercularis              | -0.140 | 0.008 | 0.004     | 0.007     | 1418 | 637 |
| Right parahippocampal gyrus         | -0.137 | 0.014 | 0.004     | 0.008     | 1420 | 642 |
| Right superior parietal cortex      | -0.131 | 0.007 | 0.007     | 0.013     | 1411 | 630 |
| Left superior parietal cortex       | -0.130 | 0.006 | 0.007     | 0.013     | 1417 | 631 |
| Left insula                         | -0.128 | 0.009 | 0.008     | 0.015     | 1414 | 633 |
| Right lateral occipital cortex      | -0.127 | 0.007 | 0.009     | 0.015     | 1421 | 634 |
| Right supramarginal gyrus           | -0.125 | 0.008 | 0.012     | 0.019     | 1321 | 599 |
| Left precentral gyrus               | -0.125 | 0.007 | 0.009     | 0.016     | 1408 | 635 |
| Left pars triangularis              | -0.123 | 0.008 | 0.010     | 0.017     | 1434 | 644 |
| Right isthmus cingulate cortex      | -0.121 | 0.010 | 0.011     | 0.018     | 1429 | 647 |
| Left entorhinal cortex              | -0.120 | 0.020 | 0.017     | 0.025     | 1318 | 587 |
| Left parahippocampal gyrus          | -0.119 | 0.016 | 0.013     | 0.020     | 1424 | 641 |
| Right lingual gyrus                 | -0.117 | 0.007 | 0.014     | 0.022     | 1433 | 642 |
| Left pars orbitalis                 | -0.114 | 0.012 | 0.017     | 0.025     | 1431 | 643 |
| Right insula                        | -0.113 | 0.010 | 0.019     | 0.028     | 1415 | 628 |
| Left superior temporal gyrus        | -0.110 | 0.009 | 0.031     | 0.043     | 1296 | 564 |
| Right entorhinal cortex             | -0.109 | 0.022 | 0.033     | 0.045     | 1244 | 560 |

|                                                |        |       |       |       |      |     |
|------------------------------------------------|--------|-------|-------|-------|------|-----|
| <b>Left rostral anterior cingulate cortex</b>  | -0.107 | 0.013 | 0.027 | 0.038 | 1415 | 630 |
| <b>Left paracentral lobule</b>                 | -0.102 | 0.008 | 0.034 | 0.045 | 1430 | 643 |
| <b>Right caudal anterior cingulate cortex</b>  | -0.092 | 0.013 | 0.055 | 0.072 | 1422 | 641 |
| <b>Right banks superior temporal sulcus</b>    | -0.075 | 0.010 | 0.136 | 0.170 | 1321 | 586 |
| <b>Left cuneus</b>                             | -0.074 | 0.007 | 0.127 | 0.162 | 1404 | 623 |
| <b>Left postcentral gyrus</b>                  | -0.069 | 0.006 | 0.152 | 0.187 | 1403 | 631 |
| <b>Right cuneus</b>                            | -0.068 | 0.007 | 0.163 | 0.193 | 1401 | 619 |
| <b>Right superior temporal gyrus</b>           | -0.068 | 0.009 | 0.176 | 0.205 | 1316 | 582 |
| <b>Left caudal anterior cingulate cortex</b>   | -0.068 | 0.015 | 0.158 | 0.191 | 1415 | 630 |
| <b>Right frontal pole</b>                      | -0.064 | 0.016 | 0.179 | 0.206 | 1434 | 646 |
| <b>Right temporal pole</b>                     | -0.061 | 0.020 | 0.206 | 0.233 | 1430 | 636 |
| <b>Right paracentral lobule</b>                | -0.059 | 0.008 | 0.218 | 0.242 | 1432 | 645 |
| <b>Right transverse temporal cortex</b>        | -0.042 | 0.011 | 0.376 | 0.411 | 1434 | 647 |
| <b>Left temporal pole</b>                      | -0.031 | 0.018 | 0.511 | 0.551 | 1435 | 645 |
| <b>Right rostral anterior cingulate cortex</b> | -0.018 | 0.013 | 0.702 | 0.745 | 1413 | 635 |
| <b>Left transverse temporal cortex</b>         | -0.015 | 0.011 | 0.760 | 0.794 | 1433 | 644 |
| <b>Right postcentral gyrus</b>                 | -0.006 | 0.006 | 0.893 | 0.919 | 1414 | 642 |
| <b>Left pericalcarine gyrus</b>                | -0.002 | 0.007 | 0.969 | 0.983 | 1406 | 635 |
| <b>Right pericalcarine gyrus</b>               | <0.001 | 0.007 | 0.992 | 0.992 | 1409 | 631 |

**TABLE S8b:** Full mega-analytic results for cortical thickness of each structure for the adult unmedicated OCD patients compared with adult healthy controls, controlling for age, sex and scan center.

|                                        | Cohen's d <sup>a</sup><br>(OCD vs HC) | Standard Error | P-value | FDR P-value | N controls | N patients |
|----------------------------------------|---------------------------------------|----------------|---------|-------------|------------|------------|
| Right inferior parietal cortex         | -0.065                                | 0.006          | 0.142   | 0.767       | 1379       | 812        |
| Left inferior parietal cortex          | -0.048                                | 0.006          | 0.286   | 0.841       | 1364       | 799        |
| Left rostral anterior cingulate cortex | -0.046                                | 0.011          | 0.293   | 0.841       | 1415       | 824        |
| Right parahippocampal gyrus            | -0.036                                | 0.012          | 0.410   | 0.896       | 1420       | 828        |
| Left entorhinal cortex                 | -0.035                                | 0.017          | 0.439   | 0.930       | 1318       | 776        |
| Left precuneus                         | -0.027                                | 0.006          | 0.535   | 0.965       | 1426       | 830        |
| Left lateral orbitofrontal cortex      | -0.026                                | 0.007          | 0.548   | 0.965       | 1433       | 832        |
| Right medial orbitofrontal cortex      | -0.022                                | 0.008          | 0.622   | 0.965       | 1428       | 826        |
| Right lateral occipital cortex         | -0.020                                | 0.006          | 0.657   | 0.965       | 1421       | 826        |
| Right lateral orbitofrontal cortex     | -0.019                                | 0.008          | 0.668   | 0.965       | 1431       | 831        |
| Right rostral middle frontal gyrus     | -0.015                                | 0.006          | 0.726   | 0.965       | 1424       | 829        |
| Left cuneus                            | -0.014                                | 0.006          | 0.750   | 0.965       | 1404       | 823        |
| Left parahippocampal gyrus             | -0.013                                | 0.014          | 0.772   | 0.965       | 1424       | 829        |
| Left pars opercularis                  | -0.013                                | 0.007          | 0.772   | 0.965       | 1427       | 828        |
| Left posterior cingulate cortex        | -0.013                                | 0.007          | 0.760   | 0.965       | 1431       | 831        |
| Right insula                           | -0.005                                | 0.008          | 0.909   | 0.975       | 1415       | 815        |
| Left fusiform gyrus                    | -0.002                                | 0.006          | 0.961   | 0.975       | 1428       | 825        |
| Right middle temporal gyrus            | -0.001                                | 0.007          | 0.976   | 0.976       | 1402       | 819        |
| Left rostral middle frontal gyrus      | 0.003                                 | 0.006          | 0.946   | 0.975       | 1429       | 828        |
| Left lateral occipital cortex          | 0.003                                 | 0.006          | 0.955   | 0.975       | 1419       | 824        |
| Right pars opercularis                 | 0.004                                 | 0.007          | 0.921   | 0.975       | 1418       | 822        |
| Right fusiform gyrus                   | 0.004                                 | 0.007          | 0.932   | 0.975       | 1428       | 809        |
| Right pars orbitalis                   | 0.006                                 | 0.010          | 0.891   | 0.975       | 1431       | 829        |
| Left medial orbitofrontal cortex       | 0.008                                 | 0.008          | 0.850   | 0.965       | 1430       | 829        |
| Right transverse temporal cortex       | 0.008                                 | 0.010          | 0.855   | 0.965       | 1434       | 830        |

|                                         |       |       |       |       |      |     |
|-----------------------------------------|-------|-------|-------|-------|------|-----|
| Left transverse temporal cortex         | 0.009 | 0.010 | 0.833 | 0.965 | 1433 | 830 |
| Right cuneus                            | 0.009 | 0.006 | 0.837 | 0.965 | 1401 | 827 |
| Left insula                             | 0.009 | 0.007 | 0.840 | 0.965 | 1414 | 819 |
| Right precuneus                         | 0.010 | 0.006 | 0.824 | 0.965 | 1429 | 829 |
| Left middle temporal gyrus              | 0.010 | 0.008 | 0.831 | 0.965 | 1320 | 769 |
| Left banks superior temporal sulcus     | 0.013 | 0.008 | 0.779 | 0.965 | 1284 | 767 |
| Left pars orbitalis                     | 0.013 | 0.010 | 0.771 | 0.965 | 1431 | 827 |
| Left superior parietal cortex           | 0.013 | 0.005 | 0.776 | 0.965 | 1417 | 821 |
| Right caudal anterior cingulate cortex  | 0.015 | 0.011 | 0.728 | 0.965 | 1422 | 823 |
| Left frontal pole                       | 0.019 | 0.014 | 0.667 | 0.965 | 1435 | 827 |
| Left caudal middle frontal gyrus        | 0.023 | 0.007 | 0.601 | 0.965 | 1429 | 816 |
| Left isthmus cingulate cortex           | 0.023 | 0.009 | 0.603 | 0.965 | 1431 | 830 |
| Right lingual gyrus                     | 0.024 | 0.006 | 0.586 | 0.965 | 1433 | 831 |
| Right isthmus cingulate cortex          | 0.024 | 0.009 | 0.587 | 0.965 | 1429 | 831 |
| Left postcentral gyrus                  | 0.027 | 0.005 | 0.544 | 0.965 | 1403 | 818 |
| Left inferior temporal cortex gyrus     | 0.029 | 0.007 | 0.517 | 0.965 | 1383 | 823 |
| Left cortical thickness                 | 0.030 | 0.004 | 0.490 | 0.965 | 1435 | 832 |
| Right inferior temporal cortex gyrus    | 0.037 | 0.007 | 0.405 | 0.896 | 1400 | 830 |
| Right rostral anterior cingulate cortex | 0.040 | 0.011 | 0.368 | 0.858 | 1413 | 821 |
| Left pericalcarine gyrus                | 0.041 | 0.006 | 0.349 | 0.843 | 1406 | 828 |
| Left pars triangularis                  | 0.041 | 0.007 | 0.349 | 0.843 | 1434 | 828 |
| Right cortical thickness                | 0.042 | 0.004 | 0.343 | 0.843 | 1435 | 830 |
| Right superior parietal cortex          | 0.044 | 0.006 | 0.319 | 0.843 | 1411 | 820 |
| Right precentral gyrus                  | 0.046 | 0.006 | 0.300 | 0.841 | 1405 | 807 |
| Left supramarginal gyrus                | 0.050 | 0.007 | 0.281 | 0.841 | 1310 | 754 |
| Right pericalcarine gyrus               | 0.051 | 0.006 | 0.252 | 0.840 | 1409 | 828 |
| Right pars triangularis                 | 0.053 | 0.007 | 0.229 | 0.801 | 1423 | 810 |
| Left paracentral lobule                 | 0.053 | 0.007 | 0.226 | 0.801 | 1430 | 828 |
| Left lingual gyrus                      | 0.054 | 0.006 | 0.223 | 0.801 | 1427 | 829 |

|                                              |       |       |       |       |      |     |
|----------------------------------------------|-------|-------|-------|-------|------|-----|
| <b>Right caudal middle frontal gyrus</b>     | 0.056 | 0.007 | 0.202 | 0.801 | 1423 | 823 |
| <b>Left caudal anterior cingulate cortex</b> | 0.058 | 0.013 | 0.191 | 0.801 | 1415 | 824 |
| <b>Right posterior cingulate cortex</b>      | 0.061 | 0.007 | 0.163 | 0.797 | 1427 | 828 |
| <b>Left superior frontal gyrus</b>           | 0.061 | 0.007 | 0.171 | 0.797 | 1413 | 803 |
| <b>Left precentral gyrus</b>                 | 0.066 | 0.006 | 0.137 | 0.767 | 1408 | 818 |
| <b>Right banks superior temporal sulcus</b>  | 0.072 | 0.008 | 0.114 | 0.723 | 1321 | 786 |
| <b>Right paracentral lobule</b>              | 0.073 | 0.007 | 0.096 | 0.723 | 1432 | 829 |
| <b>Right temporal pole</b>                   | 0.074 | 0.018 | 0.095 | 0.723 | 1430 | 808 |
| <b>Left superior temporal gyrus</b>          | 0.074 | 0.008 | 0.110 | 0.723 | 1296 | 751 |
| <b>Right frontal pole</b>                    | 0.079 | 0.014 | 0.071 | 0.712 | 1434 | 830 |
| <b>Right superior temporal gyrus</b>         | 0.084 | 0.007 | 0.065 | 0.712 | 1316 | 781 |
| <b>Left temporal pole</b>                    | 0.088 | 0.016 | 0.044 | 0.675 | 1435 | 829 |
| <b>Right superior frontal gyrus</b>          | 0.088 | 0.007 | 0.048 | 0.675 | 1410 | 821 |
| <b>Right postcentral gyrus</b>               | 0.090 | 0.006 | 0.042 | 0.675 | 1414 | 815 |
| <b>Right entorhinal cortex</b>               | 0.092 | 0.019 | 0.048 | 0.675 | 1244 | 758 |
| <b>Right supramarginal gyrus</b>             | 0.126 | 0.006 | 0.006 | 0.407 | 1321 | 773 |

**TABLE S8c:** Full mega-analytic results for cortical thickness of each structure for the adult medicated OCD patients compared with adult unmedicated patients, controlling for age, sex and scan center.

|                                      | <b>Cohen's d<sup>a</sup><br/>(NoMed vs Med)</b> | <b>Standard Error</b> | <b>P-value</b> | <b>FDR P-value</b> | <b>N medicated</b> | <b>N unmedicated</b> |
|--------------------------------------|-------------------------------------------------|-----------------------|----------------|--------------------|--------------------|----------------------|
| Right caudal middle frontal gyrus    | -0.211                                          | 0.011                 | 7.445E-05      | 0.005              | 643                | 822                  |
| Left middle temporal gyrus           | -0.192                                          | 0.012                 | 0.001          | 0.010              | 580                | 768                  |
| Left superior frontal gyrus          | -0.190                                          | 0.011                 | 4.645E-04      | 0.010              | 614                | 802                  |
| Left cortical thickness              | -0.186                                          | 0.007                 | 4.714E-04      | 0.010              | 646                | 831                  |
| Left superior temporal gyrus         | -0.177                                          | 0.012                 | 0.002          | 0.012              | 563                | 750                  |
| Right pars triangularis              | -0.174                                          | 0.011                 | 0.001          | 0.012              | 632                | 809                  |
| Left rostral middle frontal gyrus    | -0.172                                          | 0.010                 | 0.001          | 0.012              | 637                | 827                  |
| Right superior frontal gyrus         | -0.170                                          | 0.011                 | 0.001          | 0.012              | 638                | 820                  |
| Right cortical thickness             | -0.168                                          | 0.007                 | 0.002          | 0.012              | 643                | 829                  |
| Right inferior temporal cortex gyrus | -0.168                                          | 0.011                 | 0.002          | 0.012              | 638                | 829                  |
| Right supramarginal gyrus            | -0.168                                          | 0.010                 | 0.002          | 0.013              | 598                | 772                  |
| Left caudal middle frontal gyrus     | -0.165                                          | 0.011                 | 0.002          | 0.013              | 642                | 815                  |
| Left precentral gyrus                | -0.156                                          | 0.010                 | 0.004          | 0.020              | 634                | 817                  |
| Right superior temporal gyrus        | -0.153                                          | 0.012                 | 0.006          | 0.026              | 581                | 780                  |
| Right posterior cingulate cortex     | -0.152                                          | 0.012                 | 0.004          | 0.021              | 645                | 827                  |
| Left insula                          | -0.147                                          | 0.012                 | 0.006          | 0.026              | 632                | 818                  |
| Left inferior temporal cortex gyrus  | -0.146                                          | 0.011                 | 0.007          | 0.026              | 627                | 822                  |
| Right middle temporal gyrus          | -0.146                                          | 0.011                 | 0.007          | 0.026              | 628                | 818                  |
| Left pars triangularis               | -0.143                                          | 0.011                 | 0.007          | 0.026              | 643                | 827                  |
| Left supramarginal gyrus             | -0.142                                          | 0.011                 | 0.011          | 0.036              | 593                | 753                  |
| Left frontal pole                    | -0.138                                          | 0.021                 | 0.009          | 0.033              | 643                | 826                  |
| Right medial orbitofrontal cortex    | -0.132                                          | 0.013                 | 0.013          | 0.041              | 641                | 825                  |
| Right pars orbitalis                 | -0.131                                          | 0.015                 | 0.014          | 0.042              | 646                | 828                  |
| Left pars orbitalis                  | -0.130                                          | 0.015                 | 0.015          | 0.042              | 642                | 826                  |
| Left isthmus cingulate cortex        | -0.129                                          | 0.015                 | 0.015          | 0.042              | 642                | 829                  |

|                                        |        |       |       |       |     |     |
|----------------------------------------|--------|-------|-------|-------|-----|-----|
| Right entorhinal cortex                | -0.128 | 0.028 | 0.024 | 0.059 | 559 | 757 |
| Left paracentral lobule                | -0.125 | 0.011 | 0.018 | 0.049 | 642 | 827 |
| Left caudal anterior cingulate cortex  | -0.121 | 0.021 | 0.024 | 0.059 | 629 | 823 |
| Left fusiform gyrus                    | -0.118 | 0.010 | 0.026 | 0.063 | 644 | 824 |
| Right lateral orbitofrontal cortex     | -0.116 | 0.012 | 0.029 | 0.068 | 646 | 830 |
| Left inferior parietal cortex          | -0.115 | 0.010 | 0.035 | 0.078 | 615 | 798 |
| Left medial orbitofrontal cortex       | -0.111 | 0.012 | 0.037 | 0.082 | 641 | 828 |
| Right fusiform gyrus                   | -0.111 | 0.010 | 0.039 | 0.083 | 631 | 808 |
| Right caudal anterior cingulate cortex | -0.105 | 0.018 | 0.050 | 0.102 | 640 | 822 |
| Left pars opercularis                  | -0.104 | 0.011 | 0.051 | 0.102 | 641 | 827 |
| Left parahippocampal gyrus             | -0.102 | 0.022 | 0.055 | 0.106 | 640 | 828 |
| Right banks superior temporal sulcus   | -0.098 | 0.013 | 0.075 | 0.141 | 585 | 785 |
| Left temporal pole                     | -0.092 | 0.025 | 0.084 | 0.154 | 644 | 828 |
| Right frontal pole                     | -0.091 | 0.021 | 0.088 | 0.154 | 645 | 829 |
| Right parahippocampal gyrus            | -0.091 | 0.018 | 0.088 | 0.154 | 641 | 827 |
| Left lingual gyrus                     | -0.089 | 0.009 | 0.095 | 0.163 | 641 | 828 |
| Right inferior parietal cortex         | -0.087 | 0.010 | 0.107 | 0.178 | 622 | 811 |
| Right precentral gyrus                 | -0.086 | 0.010 | 0.112 | 0.178 | 629 | 806 |
| Right insula                           | -0.086 | 0.013 | 0.110 | 0.178 | 627 | 814 |
| Right precuneus                        | -0.080 | 0.010 | 0.133 | 0.205 | 642 | 828 |
| Right temporal pole                    | -0.080 | 0.027 | 0.134 | 0.205 | 635 | 807 |
| Right superior parietal cortex         | -0.078 | 0.009 | 0.146 | 0.217 | 629 | 819 |
| Right rostral middle frontal gyrus     | -0.076 | 0.009 | 0.153 | 0.224 | 644 | 828 |
| Right isthmus cingulate cortex         | -0.072 | 0.014 | 0.176 | 0.246 | 646 | 830 |
| Left rostral anterior cingulate cortex | -0.072 | 0.018 | 0.179 | 0.246 | 629 | 823 |
| Left lateral orbitofrontal cortex      | -0.072 | 0.012 | 0.173 | 0.246 | 642 | 831 |
| Left banks superior temporal sulcus    | -0.065 | 0.013 | 0.244 | 0.316 | 572 | 766 |
| Right transverse temporal cortex       | -0.063 | 0.015 | 0.235 | 0.310 | 646 | 829 |
| Left precuneus                         | -0.063 | 0.009 | 0.233 | 0.310 | 643 | 829 |

|                                         |        |       |       |       |     |     |
|-----------------------------------------|--------|-------|-------|-------|-----|-----|
| Right paracentral lobule                | -0.060 | 0.011 | 0.259 | 0.329 | 644 | 828 |
| Right lateral occipital cortex          | -0.054 | 0.010 | 0.311 | 0.388 | 633 | 825 |
| Left lateral occipital cortex           | -0.049 | 0.010 | 0.363 | 0.446 | 636 | 823 |
| Right rostral anterior cingulate cortex | -0.047 | 0.017 | 0.384 | 0.456 | 634 | 820 |
| Left posterior cingulate cortex         | -0.047 | 0.011 | 0.377 | 0.455 | 641 | 830 |
| Right pars opercularis                  | -0.046 | 0.011 | 0.393 | 0.459 | 636 | 821 |
| Left superior parietal cortex           | -0.044 | 0.008 | 0.407 | 0.467 | 630 | 820 |
| Right cuneus                            | -0.037 | 0.010 | 0.495 | 0.559 | 618 | 826 |
| Left postcentral gyrus                  | -0.023 | 0.008 | 0.665 | 0.735 | 630 | 817 |
| Right lingual gyrus                     | -0.005 | 0.009 | 0.927 | 0.940 | 641 | 830 |
| Left entorhinal cortex                  | 0.004  | 0.027 | 0.948 | 0.948 | 586 | 775 |
| Left transverse temporal cortex         | 0.006  | 0.015 | 0.917 | 0.940 | 643 | 829 |
| Right postcentral gyrus                 | 0.009  | 0.008 | 0.859 | 0.897 | 641 | 814 |
| Right pericalcarine gyrus               | 0.021  | 0.009 | 0.693 | 0.735 | 630 | 827 |
| Left pericalcarine gyrus                | 0.022  | 0.009 | 0.682 | 0.735 | 634 | 827 |
| Left cuneus                             | 0.023  | 0.009 | 0.672 | 0.735 | 622 | 822 |



**TABLE S9a:** Full mega-analytic results for surface area of each structure for the adult medicated OCD patients compared with healthy adult controls, controlling for age, sex, scan center and ICV.

|                                               | <b>Cohen's d<sup>a</sup><br/>(Med vs HC)</b> | <b>Standard Error</b> | <b>P-value</b> | <b>FDR P-value</b> | <b>N controls</b> | <b>N patients</b> |
|-----------------------------------------------|----------------------------------------------|-----------------------|----------------|--------------------|-------------------|-------------------|
| <b>Left transverse temporal cortex</b>        | -0.196                                       | 3.711                 | 4.299E-05      | 0.003              | 1431              | 643               |
| <b>Right transverse temporal cortex</b>       | -0.115                                       | 2.727                 | 0.017          | 0.314              | 1432              | 646               |
| <b>Right supramarginal gyrus</b>              | -0.103                                       | 22.389                | 0.038          | 0.516              | 1319              | 598               |
| <b>Right superior temporal gyrus</b>          | -0.093                                       | 16.026                | 0.064          | 0.625              | 1314              | 581               |
| <b>Left postcentral gyrus</b>                 | -0.076                                       | 20.409                | 0.118          | 0.774              | 1401              | 630               |
| <b>Left superior temporal gyrus</b>           | -0.070                                       | 19.043                | 0.168          | 0.796              | 1294              | 563               |
| <b>Left pars triangularis</b>                 | -0.069                                       | 8.937                 | 0.148          | 0.775              | 1432              | 643               |
| <b>Left lingual gyrus</b>                     | -0.064                                       | 18.617                | 0.180          | 0.796              | 1425              | 641               |
| <b>Right pars triangularis</b>                | -0.058                                       | 11.107                | 0.228          | 0.821              | 1421              | 632               |
| <b>Left entorhinal cortex</b>                 | -0.054                                       | 3.982                 | 0.280          | 0.868              | 1316              | 587               |
| <b>Left pars orbitalis</b>                    | -0.051                                       | 3.722                 | 0.286          | 0.868              | 1429              | 642               |
| <b>Left lateral occipital cortex</b>          | -0.048                                       | 24.549                | 0.321          | 0.868              | 1417              | 636               |
| <b>Left supramarginal gyrus</b>               | -0.043                                       | 23.994                | 0.385          | 0.868              | 1308              | 593               |
| <b>Left pericalcarine gyrus</b>               | -0.042                                       | 10.541                | 0.382          | 0.868              | 1404              | 634               |
| <b>Left pars opercularis</b>                  | -0.040                                       | 12.862                | 0.404          | 0.868              | 1425              | 641               |
| <b>Left superior parietal cortex</b>          | -0.039                                       | 27.211                | 0.415          | 0.868              | 1415              | 630               |
| <b>Right pericalcarine gyrus</b>              | -0.038                                       | 11.238                | 0.437          | 0.868              | 1407              | 630               |
| <b>Right superior frontal gyrus</b>           | -0.031                                       | 30.483                | 0.521          | 0.909              | 1408              | 638               |
| <b>Right lateral occipital cortex</b>         | -0.028                                       | 25.095                | 0.557          | 0.928              | 1419              | 633               |
| <b>Left surface area</b>                      | -0.026                                       | 242.713               | 0.593          | 1.000              | 1433              | 646               |
| <b>Right caudal anterior cingulate cortex</b> | -0.020                                       | 7.381                 | 0.682          | 0.945              | 1420              | 640               |
| <b>Right superior parietal cortex</b>         | -0.020                                       | 26.467                | 0.673          | 0.945              | 1409              | 629               |
| <b>Left insula</b>                            | -0.019                                       | 10.363                | 0.696          | 0.945              | 1412              | 632               |
| <b>Right entorhinal cortex</b>                | -0.019                                       | 6.929                 | 0.707          | 0.945              | 1242              | 559               |
| <b>Right pars opercularis</b>                 | -0.019                                       | 10.725                | 0.686          | 0.945              | 1416              | 637               |

|                                         |        |         |       |       |      |     |
|-----------------------------------------|--------|---------|-------|-------|------|-----|
| Left superior frontal gyrus             | -0.017 | 30.432  | 0.735 | 0.945 | 1411 | 614 |
| Right middle temporal gyrus             | -0.015 | 16.885  | 0.759 | 0.945 | 1401 | 629 |
| Right isthmus cingulate cortex          | -0.014 | 6.752   | 0.773 | 0.945 | 1427 | 646 |
| Left lateral orbitofrontal cortex       | -0.012 | 12.148  | 0.804 | 0.945 | 1431 | 642 |
| Left caudal middle frontal gyrus        | -0.003 | 16.501  | 0.947 | 0.981 | 1427 | 642 |
| Left inferior temporal cortex gyrus     | -0.002 | 20.335  | 0.965 | 0.981 | 1382 | 627 |
| Right lingual gyrus                     | -0.001 | 17.446  | 0.979 | 0.981 | 1431 | 641 |
| Right rostral anterior cingulate cortex | 0.001  | 6.154   | 0.981 | 0.981 | 1411 | 635 |
| Left cuneus                             | 0.002  | 9.401   | 0.961 | 0.981 | 1402 | 622 |
| Right insula                            | 0.002  | 11.048  | 0.970 | 0.981 | 1413 | 627 |
| Right pars orbitalis                    | 0.004  | 4.567   | 0.931 | 0.981 | 1429 | 646 |
| Left precentral gyrus                   | 0.004  | 20.774  | 0.938 | 0.981 | 1406 | 634 |
| Left frontal pole                       | 0.009  | 1.699   | 0.858 | 0.974 | 1433 | 643 |
| Right postcentral gyrus                 | 0.009  | 19.422  | 0.859 | 0.974 | 1412 | 641 |
| Right precuneus                         | 0.012  | 19.925  | 0.803 | 0.945 | 1427 | 642 |
| Right posterior cingulate cortex        | 0.012  | 8.239   | 0.806 | 0.945 | 1425 | 645 |
| Right surface area                      | 0.014  | 245.340 | 0.769 | 1.000 | 1434 | 644 |
| Left middle temporal gyrus              | 0.016  | 16.875  | 0.748 | 0.945 | 1319 | 580 |
| Right banks superior temporal sulcus    | 0.018  | 6.639   | 0.715 | 0.945 | 1319 | 585 |
| Right fusiform gyrus                    | 0.018  | 17.611  | 0.705 | 0.945 | 1426 | 631 |
| Left banks superior temporal sulcus     | 0.019  | 7.901   | 0.714 | 0.945 | 1282 | 572 |
| Right parahippocampal gyrus             | 0.022  | 4.846   | 0.647 | 0.945 | 1418 | 641 |
| Right inferior temporal cortex gyrus    | 0.027  | 19.142  | 0.569 | 0.928 | 1399 | 638 |
| Left rostral middle frontal gyrus       | 0.027  | 29.040  | 0.573 | 0.928 | 1427 | 637 |
| Left temporal pole                      | 0.031  | 2.967   | 0.512 | 0.909 | 1434 | 644 |
| Left precuneus                          | 0.033  | 18.246  | 0.492 | 0.905 | 1424 | 643 |
| Left fusiform gyrus                     | 0.035  | 17.891  | 0.460 | 0.868 | 1426 | 644 |
| Right lateral orbitofrontal cortex      | 0.035  | 12.983  | 0.460 | 0.868 | 1429 | 646 |
| Right cuneus                            | 0.036  | 9.417   | 0.454 | 0.868 | 1399 | 618 |

|                                        |       |        |       |       |      |     |
|----------------------------------------|-------|--------|-------|-------|------|-----|
| Left isthmus cingulate cortex          | 0.038 | 7.633  | 0.422 | 0.868 | 1429 | 642 |
| Right temporal pole                    | 0.041 | 3.033  | 0.395 | 0.868 | 1428 | 635 |
| Left paracentral lobule                | 0.041 | 8.422  | 0.395 | 0.868 | 1428 | 642 |
| Right caudal middle frontal gyrus      | 0.044 | 16.891 | 0.362 | 0.868 | 1421 | 643 |
| Right precentral gyrus                 | 0.045 | 23.234 | 0.357 | 0.868 | 1403 | 629 |
| Left posterior cingulate cortex        | 0.046 | 7.840  | 0.340 | 0.868 | 1429 | 641 |
| Left medial orbitofrontal cortex       | 0.058 | 10.371 | 0.229 | 0.821 | 1428 | 641 |
| Right paracentral lobule               | 0.059 | 9.574  | 0.220 | 0.821 | 1430 | 644 |
| Right rostral middle frontal gyrus     | 0.063 | 29.615 | 0.187 | 0.796 | 1422 | 644 |
| Left rostral anterior cingulate cortex | 0.072 | 6.884  | 0.134 | 0.774 | 1413 | 629 |
| Left inferior parietal cortex          | 0.073 | 26.953 | 0.137 | 0.774 | 1363 | 615 |
| Right frontal pole                     | 0.079 | 2.137  | 0.098 | 0.737 | 1432 | 645 |
| Left caudal anterior cingulate cortex  | 0.086 | 6.299  | 0.077 | 0.652 | 1413 | 629 |
| Left parahippocampal gyrus             | 0.090 | 5.024  | 0.060 | 0.625 | 1422 | 640 |
| Right medial orbitofrontal cortex      | 0.113 | 8.699  | 0.018 | 0.314 | 1426 | 642 |
| Right inferior parietal cortex         | 0.118 | 30.449 | 0.015 | 0.314 | 1377 | 622 |

**TABLE S9b:** Full mega-analytic results for surface area of each structure for the adult unmedicated OCD patients compared with adult healthy controls, controlling for age, sex, scan center and ICV.

|                                                | <b>Cohen's d<sup>a</sup><br/>(NoMed vs HC)</b> | <b>Standard Error</b> | <b>P-value</b> | <b>FDR P-value</b> | <b>N controls</b> | <b>N patients</b> |
|------------------------------------------------|------------------------------------------------|-----------------------|----------------|--------------------|-------------------|-------------------|
| <b>Right posterior cingulate cortex</b>        | -0.134                                         | 7.202                 | 0.002          | 0.161              | 1425              | 828               |
| <b>Right superior temporal gyrus</b>           | -0.117                                         | 13.919                | 0.010          | 0.233              | 1314              | 781               |
| <b>Left transverse temporal cortex</b>         | -0.116                                         | 3.268                 | 0.008          | 0.233              | 1431              | 830               |
| <b>Left pars triangularis</b>                  | -0.102                                         | 8.058                 | 0.020          | 0.343              | 1432              | 828               |
| <b>Left pars opercularis</b>                   | -0.098                                         | 11.234                | 0.026          | 0.360              | 1425              | 828               |
| <b>Right transverse temporal cortex</b>        | -0.088                                         | 2.399                 | 0.046          | 0.453              | 1432              | 830               |
| <b>Left insula</b>                             | -0.083                                         | 8.689                 | 0.061          | 0.453              | 1412              | 819               |
| <b>Left superior frontal gyrus</b>             | -0.083                                         | 25.958                | 0.062          | 0.453              | 1411              | 803               |
| <b>Right rostral anterior cingulate cortex</b> | -0.083                                         | 5.459                 | 0.060          | 0.453              | 1411              | 821               |
| <b>Left surface area</b>                       | -0.081                                         | 206.324               | 0.065          | 1.000              | 1433              | 832               |
| <b>Right superior frontal gyrus</b>            | -0.081                                         | 26.476                | 0.067          | 0.453              | 1408              | 821               |
| <b>Right surface area</b>                      | -0.077                                         | 208.920               | 0.078          | 1.000              | 1434              | 832               |
| <b>Left lateral orbitofrontal cortex</b>       | -0.073                                         | 10.246                | 0.097          | 0.602              | 1431              | 832               |
| <b>Left posterior cingulate cortex</b>         | -0.067                                         | 6.908                 | 0.125          | 0.658              | 1429              | 831               |
| <b>Left caudal middle frontal gyrus</b>        | -0.064                                         | 14.682                | 0.149          | 0.658              | 1427              | 816               |
| <b>Right supramarginal gyrus</b>               | -0.061                                         | 19.835                | 0.185          | 0.658              | 1319              | 773               |
| <b>Left postcentral gyrus</b>                  | -0.061                                         | 17.743                | 0.170          | 0.658              | 1401              | 818               |
| <b>Left frontal pole</b>                       | -0.061                                         | 1.510                 | 0.166          | 0.658              | 1433              | 827               |
| <b>Right caudal anterior cingulate cortex</b>  | -0.060                                         | 6.555                 | 0.175          | 0.658              | 1420              | 823               |
| <b>Right cuneus</b>                            | -0.059                                         | 7.910                 | 0.184          | 0.658              | 1399              | 827               |
| <b>Left cuneus</b>                             | -0.059                                         | 8.161                 | 0.180          | 0.658              | 1402              | 823               |
| <b>Left paracentral lobule</b>                 | -0.056                                         | 7.286                 | 0.203          | 0.658              | 1428              | 828               |
| <b>Left supramarginal gyrus</b>                | -0.056                                         | 21.233                | 0.223          | 0.658              | 1308              | 754               |
| <b>Left superior temporal gyrus</b>            | -0.056                                         | 16.149                | 0.223          | 0.658              | 1294              | 751               |
| <b>Left superior parietal cortex</b>           | -0.055                                         | 23.977                | 0.210          | 0.658              | 1415              | 821               |

|                                        |        |        |       |       |      |     |
|----------------------------------------|--------|--------|-------|-------|------|-----|
| Left lateral occipital cortex          | -0.050 | 21.069 | 0.253 | 0.718 | 1417 | 824 |
| Left rostral anterior cingulate cortex | -0.049 | 5.917  | 0.267 | 0.724 | 1413 | 824 |
| Right insula                           | -0.048 | 9.888  | 0.277 | 0.724 | 1413 | 815 |
| Right pericalcarine gyrus              | -0.047 | 9.890  | 0.288 | 0.725 | 1407 | 828 |
| Left inferior temporal cortex gyrus    | -0.045 | 17.442 | 0.315 | 0.727 | 1382 | 823 |
| Right caudal middle frontal gyrus      | -0.044 | 14.827 | 0.320 | 0.727 | 1421 | 823 |
| Right middle temporal gyrus            | -0.044 | 14.508 | 0.321 | 0.727 | 1401 | 819 |
| Left isthmus cingulate cortex          | -0.041 | 6.780  | 0.351 | 0.744 | 1429 | 830 |
| Right postcentral gyrus                | -0.040 | 17.527 | 0.371 | 0.744 | 1412 | 815 |
| Right precentral gyrus                 | -0.040 | 19.981 | 0.368 | 0.744 | 1403 | 807 |
| Right superior parietal cortex         | -0.038 | 23.530 | 0.396 | 0.770 | 1409 | 820 |
| Right pars opercularis                 | -0.036 | 9.485  | 0.414 | 0.778 | 1416 | 822 |
| Right lateral occipital cortex         | -0.035 | 21.828 | 0.424 | 0.778 | 1419 | 826 |
| Right precuneus                        | -0.031 | 17.459 | 0.477 | 0.812 | 1427 | 829 |
| Left caudal anterior cingulate cortex  | -0.030 | 5.579  | 0.501 | 0.812 | 1413 | 824 |
| Right fusiform gyrus                   | -0.029 | 15.187 | 0.510 | 0.812 | 1426 | 809 |
| Right lingual gyrus                    | -0.029 | 15.308 | 0.502 | 0.812 | 1431 | 831 |
| Right medial orbitofrontal cortex      | -0.028 | 7.540  | 0.526 | 0.812 | 1426 | 826 |
| Left rostral middle frontal gyrus      | -0.028 | 25.429 | 0.520 | 0.812 | 1427 | 828 |
| Right rostral middle frontal gyrus     | -0.028 | 26.246 | 0.519 | 0.812 | 1422 | 829 |
| Left temporal pole                     | -0.027 | 2.674  | 0.544 | 0.812 | 1434 | 829 |
| Right frontal pole                     | -0.026 | 1.904  | 0.552 | 0.812 | 1432 | 830 |
| Left medial orbitofrontal cortex       | -0.025 | 9.268  | 0.573 | 0.812 | 1428 | 829 |
| Right isthmus cingulate cortex         | -0.025 | 6.050  | 0.565 | 0.812 | 1427 | 831 |
| Right entorhinal cortex                | -0.022 | 5.895  | 0.640 | 0.888 | 1242 | 758 |
| Left middle temporal gyrus             | -0.018 | 14.794 | 0.689 | 0.894 | 1319 | 769 |
| Right lateral orbitofrontal cortex     | -0.016 | 11.382 | 0.710 | 0.894 | 1429 | 831 |
| Left pars orbitalis                    | -0.012 | 3.265  | 0.777 | 0.943 | 1429 | 827 |
| Left pericalcarine gyrus               | -0.010 | 9.182  | 0.820 | 0.972 | 1404 | 828 |

|                                      |        |        |       |       |      |     |
|--------------------------------------|--------|--------|-------|-------|------|-----|
| Left parahippocampal gyrus           | -0.006 | 4.252  | 0.884 | 0.973 | 1422 | 829 |
| Right parahippocampal gyrus          | -0.005 | 4.073  | 0.909 | 0.973 | 1418 | 828 |
| Left lingual gyrus                   | -0.005 | 16.262 | 0.903 | 0.973 | 1425 | 829 |
| Right pars orbitalis                 | -0.003 | 4.070  | 0.938 | 0.973 | 1429 | 829 |
| Right pars triangularis              | -0.002 | 10.141 | 0.959 | 0.973 | 1421 | 810 |
| Left precentral gyrus                | 0.000  | 18.183 | 0.992 | 0.992 | 1406 | 818 |
| Right paracentral lobule             | 0.002  | 8.584  | 0.956 | 0.973 | 1430 | 829 |
| Right temporal pole                  | 0.003  | 2.765  | 0.939 | 0.973 | 1428 | 808 |
| Left inferior parietal cortex        | 0.006  | 23.687 | 0.892 | 0.973 | 1363 | 799 |
| Left banks superior temporal sulcus  | 0.009  | 7.018  | 0.838 | 0.972 | 1282 | 767 |
| Right inferior temporal cortex gyrus | 0.009  | 16.693 | 0.843 | 0.972 | 1399 | 830 |
| Right inferior parietal cortex       | 0.014  | 26.416 | 0.759 | 0.939 | 1377 | 812 |
| Left entorhinal cortex               | 0.017  | 3.412  | 0.702 | 0.894 | 1316 | 776 |
| Right banks superior temporal sulcus | 0.017  | 5.842  | 0.705 | 0.894 | 1319 | 786 |
| Left fusiform gyrus                  | 0.018  | 15.790 | 0.682 | 0.894 | 1426 | 825 |
| Left precuneus                       | 0.039  | 15.656 | 0.372 | 0.744 | 1424 | 830 |

**TABLE S9c:** Full mega-analytic results for surface area of each structure for the adult medicated OCD patients compared with adult unmedicated patients, controlling for age, sex, scan center and ICV.

|                                         | <b>Cohen's d<sup>a</sup><br/>(NoMed vs Med)</b> | <b>Standard Error</b> | <b>P-value</b> | <b>FDR P-value</b> | <b>N medicated patients</b> | <b>N unmedicated patients</b> |
|-----------------------------------------|-------------------------------------------------|-----------------------|----------------|--------------------|-----------------------------|-------------------------------|
| Left transverse temporal cortex         | -0.060                                          | 4.927                 | 0.257          | 0.826              | 642                         | 829                           |
| Left entorhinal cortex                  | -0.055                                          | 5.252                 | 0.318          | 0.864              | 586                         | 775                           |
| Left superior temporal gyrus            | -0.049                                          | 24.305                | 0.390          | 0.915              | 562                         | 750                           |
| Right pars triangularis                 | -0.047                                          | 15.434                | 0.382          | 0.915              | 631                         | 809                           |
| Right rostral anterior cingulate cortex | -0.045                                          | 8.329                 | 0.404          | 0.916              | 634                         | 820                           |
| Right entorhinal cortex                 | -0.034                                          | 6.023                 | 0.543          | 0.984              | 558                         | 757                           |
| Left precuneus                          | -0.032                                          | 24.437                | 0.545          | 0.984              | 642                         | 829                           |
| Right fusiform gyrus                    | -0.029                                          | 23.457                | 0.583          | 0.984              | 630                         | 808                           |
| Right paracentral lobule                | -0.022                                          | 13.318                | 0.675          | 0.984              | 643                         | 828                           |
| Right caudal anterior cingulate cortex  | -0.022                                          | 9.600                 | 0.674          | 0.984              | 639                         | 822                           |
| Left pars orbitalis                     | -0.021                                          | 4.991                 | 0.694          | 0.984              | 641                         | 826                           |
| Left superior parietal cortex           | -0.017                                          | 36.313                | 0.746          | 0.984              | 629                         | 820                           |
| Right supramarginal gyrus               | -0.016                                          | 30.611                | 0.776          | 0.984              | 597                         | 772                           |
| Right pars opercularis                  | -0.012                                          | 14.682                | 0.820          | 0.984              | 636                         | 821                           |
| Right isthmus cingulate cortex          | -0.009                                          | 9.550                 | 0.870          | 0.984              | 645                         | 830                           |
| Left postcentral gyrus                  | -0.008                                          | 27.343                | 0.883          | 0.984              | 629                         | 817                           |
| Left supramarginal gyrus                | -0.002                                          | 32.169                | 0.976          | 0.985              | 592                         | 753                           |
| Left lateral occipital cortex           | -0.001                                          | 31.803                | 0.985          | 0.985              | 635                         | 823                           |
| Right parahippocampal gyrus             | -0.001                                          | 6.285                 | 0.984          | 0.985              | 640                         | 827                           |
| Right superior parietal cortex          | 0.003                                           | 35.094                | 0.951          | 0.985              | 628                         | 819                           |
| Right inferior temporal cortex gyrus    | 0.004                                           | 26.176                | 0.937          | 0.985              | 637                         | 829                           |
| Left fusiform gyrus                     | 0.004                                           | 24.455                | 0.938          | 0.985              | 643                         | 824                           |
| Left banks superior temporal sulcus     | 0.006                                           | 10.913                | 0.908          | 0.985              | 571                         | 766                           |
| Right lingual gyrus                     | 0.009                                           | 24.350                | 0.864          | 0.984              | 640                         | 830                           |
| Left pericalcarine gyrus                | 0.010                                           | 13.924                | 0.854          | 0.984              | 633                         | 827                           |

|                                        |       |         |       |       |     |     |
|----------------------------------------|-------|---------|-------|-------|-----|-----|
| Left lateral orbitofrontal cortex      | 0.012 | 15.917  | 0.825 | 0.984 | 641 | 831 |
| Left isthmus cingulate cortex          | 0.013 | 10.543  | 0.803 | 0.984 | 641 | 829 |
| Right precuneus                        | 0.014 | 26.450  | 0.795 | 0.984 | 641 | 828 |
| Left superior frontal gyrus            | 0.014 | 42.027  | 0.800 | 0.984 | 613 | 802 |
| Right pericalcarine gyrus              | 0.016 | 14.717  | 0.767 | 0.984 | 629 | 827 |
| Right lateral occipital cortex         | 0.017 | 33.208  | 0.745 | 0.984 | 632 | 825 |
| Right insula                           | 0.017 | 14.617  | 0.756 | 0.984 | 626 | 814 |
| Left rostral anterior cingulate cortex | 0.019 | 8.984   | 0.717 | 0.984 | 628 | 823 |
| Left caudal middle frontal gyrus       | 0.020 | 22.562  | 0.709 | 0.984 | 641 | 815 |
| Left lingual gyrus                     | 0.021 | 24.655  | 0.691 | 0.984 | 640 | 828 |
| Left paracentral lobule                | 0.021 | 11.026  | 0.699 | 0.984 | 641 | 827 |
| Left medial orbitofrontal cortex       | 0.022 | 13.946  | 0.676 | 0.984 | 640 | 828 |
| Left insula                            | 0.025 | 13.537  | 0.638 | 0.984 | 631 | 818 |
| Right superior frontal gyrus           | 0.026 | 41.452  | 0.628 | 0.984 | 637 | 820 |
| Right pars orbitalis                   | 0.028 | 6.195   | 0.603 | 0.984 | 645 | 828 |
| Left inferior temporal cortex gyrus    | 0.037 | 26.769  | 0.496 | 0.984 | 626 | 822 |
| Right lateral orbitofrontal cortex     | 0.038 | 17.256  | 0.469 | 0.984 | 645 | 830 |
| Right transverse temporal cortex       | 0.038 | 3.618   | 0.479 | 0.984 | 645 | 829 |
| Left surface area                      | 0.046 | 324.646 | 0.389 | 1.000 | 645 | 831 |
| Right banks superior temporal sulcus   | 0.049 | 8.830   | 0.373 | 0.915 | 584 | 785 |
| Right superior temporal gyrus          | 0.052 | 21.356  | 0.347 | 0.908 | 580 | 780 |
| Left pars triangularis                 | 0.054 | 12.269  | 0.312 | 0.864 | 642 | 827 |
| Right caudal middle frontal gyrus      | 0.058 | 22.780  | 0.279 | 0.826 | 642 | 822 |
| Right temporal pole                    | 0.060 | 4.030   | 0.260 | 0.826 | 634 | 807 |
| Left parahippocampal gyrus             | 0.060 | 6.784   | 0.257 | 0.826 | 639 | 828 |
| Left inferior parietal cortex          | 0.060 | 37.052  | 0.267 | 0.826 | 614 | 798 |
| Left middle temporal gyrus             | 0.062 | 22.699  | 0.268 | 0.826 | 579 | 768 |
| Right posterior cingulate cortex       | 0.065 | 11.149  | 0.223 | 0.826 | 644 | 827 |
| Left pars opercularis                  | 0.069 | 16.719  | 0.197 | 0.826 | 640 | 827 |



|                                              |       |         |       |       |     |     |
|----------------------------------------------|-------|---------|-------|-------|-----|-----|
| <b>Left frontal pole</b>                     | 0.070 | 2.273   | 0.188 | 0.826 | 642 | 826 |
| <b>Right inferior parietal cortex</b>        | 0.071 | 40.471  | 0.188 | 0.826 | 621 | 811 |
| <b>Left rostral middle frontal gyrus</b>     | 0.072 | 38.444  | 0.175 | 0.826 | 636 | 827 |
| <b>Left precentral gyrus</b>                 | 0.072 | 28.805  | 0.178 | 0.826 | 633 | 817 |
| <b>Right middle temporal gyrus</b>           | 0.074 | 22.224  | 0.165 | 0.826 | 628 | 818 |
| <b>Right surface area</b>                    | 0.074 | 327.805 | 0.163 | 1.000 | 643 | 831 |
| <b>Right postcentral gyrus</b>               | 0.092 | 25.967  | 0.085 | 0.577 | 640 | 814 |
| <b>Right frontal pole</b>                    | 0.100 | 2.957   | 0.060 | 0.450 | 644 | 829 |
| <b>Right medial orbitofrontal cortex</b>     | 0.101 | 11.679  | 0.057 | 0.450 | 641 | 825 |
| <b>Left posterior cingulate cortex</b>       | 0.101 | 10.355  | 0.058 | 0.450 | 640 | 830 |
| <b>Left cuneus</b>                           | 0.104 | 12.704  | 0.053 | 0.450 | 621 | 822 |
| <b>Right rostral middle frontal gyrus</b>    | 0.110 | 38.777  | 0.038 | 0.450 | 643 | 828 |
| <b>Left caudal anterior cingulate cortex</b> | 0.113 | 8.664   | 0.035 | 0.450 | 628 | 823 |
| <b>Right cuneus</b>                          | 0.114 | 12.496  | 0.035 | 0.450 | 617 | 826 |
| <b>Left temporal pole</b>                    | 0.128 | 4.004   | 0.016 | 0.450 | 643 | 828 |
| <b>Right precentral gyrus</b>                | 0.129 | 31.470  | 0.017 | 0.450 | 628 | 806 |

**TABLE S10a:** Full mega-analytic results for cortical thickness of each structure for the pediatric medicated OCD patients compared with pediatric healthy controls, controlling for age, sex and scan center.

|                                     | <b>Cohen's d<sup>a</sup><br/>(Med vs HC)</b> | <b>Standard Error</b> | <b>P-value</b> | <b>FDR P-value</b> | <b>N controls</b> | <b>N patients</b> |
|-------------------------------------|----------------------------------------------|-----------------------|----------------|--------------------|-------------------|-------------------|
| Left lateral occipital cortex       | -0.321                                       | 0.012                 | 0.001          | 0.022              | 319               | 181               |
| Left inferior parietal cortex       | -0.314                                       | 0.015                 | 0.001          | 0.022              | 301               | 173               |
| Left superior parietal cortex       | -0.309                                       | 0.013                 | 0.001          | 0.022              | 317               | 183               |
| Right superior parietal cortex      | -0.306                                       | 0.014                 | 0.001          | 0.022              | 320               | 182               |
| Right inferior parietal cortex      | -0.305                                       | 0.015                 | 0.002          | 0.022              | 309               | 176               |
| Right cuneus                        | -0.255                                       | 0.016                 | 0.007          | 0.081              | 323               | 182               |
| Left precuneus                      | -0.238                                       | 0.015                 | 0.012          | 0.117              | 320               | 181               |
| Right lateral occipital cortex      | -0.234                                       | 0.013                 | 0.013          | 0.117              | 321               | 181               |
| Right precuneus                     | -0.227                                       | 0.014                 | 0.017          | 0.132              | 324               | 177               |
| Right pericalcarine gyrus           | -0.211                                       | 0.015                 | 0.025          | 0.175              | 323               | 182               |
| Left cortical thickness             | -0.196                                       | 0.010                 | 0.038          | 0.240              | 324               | 183               |
| Right caudal middle frontal gyrus   | -0.192                                       | 0.018                 | 0.043          | 0.248              | 318               | 181               |
| Left supramarginal gyrus            | -0.183                                       | 0.016                 | 0.060          | 0.300              | 299               | 173               |
| Left cuneus                         | -0.181                                       | 0.015                 | 0.056          | 0.300              | 320               | 181               |
| Right posterior cingulate cortex    | -0.164                                       | 0.017                 | 0.083          | 0.349              | 322               | 182               |
| Left paracentral lobule             | -0.159                                       | 0.017                 | 0.093          | 0.349              | 321               | 180               |
| Left pericalcarine gyrus            | -0.158                                       | 0.014                 | 0.097          | 0.349              | 320               | 179               |
| Left posterior cingulate cortex     | -0.158                                       | 0.018                 | 0.095          | 0.349              | 320               | 181               |
| Right pars opercularis              | -0.158                                       | 0.018                 | 0.097          | 0.349              | 316               | 178               |
| Left banks superior temporal sulcus | -0.154                                       | 0.021                 | 0.124          | 0.349              | 297               | 160               |
| Left middle temporal gyrus          | -0.153                                       | 0.018                 | 0.114          | 0.349              | 309               | 173               |
| Right paracentral lobule            | -0.153                                       | 0.017                 | 0.105          | 0.349              | 323               | 181               |
| Left fusiform gyrus                 | -0.147                                       | 0.014                 | 0.122          | 0.349              | 314               | 179               |
| Right cortical thickness            | -0.145                                       | 0.010                 | 0.124          | 0.349              | 324               | 183               |
| Left precentral gyrus               | -0.144                                       | 0.014                 | 0.130          | 0.349              | 313               | 182               |

|                                         |        |       |       |       |     |     |
|-----------------------------------------|--------|-------|-------|-------|-----|-----|
| Right supramarginal gyrus               | -0.140 | 0.015 | 0.147 | 0.381 | 303 | 176 |
| Left isthmus cingulate cortex           | -0.133 | 0.022 | 0.161 | 0.403 | 322 | 178 |
| Right banks superior temporal sulcus    | -0.131 | 0.021 | 0.176 | 0.411 | 298 | 175 |
| Left superior frontal gyrus             | -0.129 | 0.017 | 0.176 | 0.411 | 316 | 179 |
| Right precentral gyrus                  | -0.125 | 0.014 | 0.189 | 0.427 | 312 | 178 |
| Left caudal anterior cingulate cortex   | -0.121 | 0.027 | 0.200 | 0.438 | 316 | 181 |
| Left inferior temporal cortex gyrus     | -0.117 | 0.018 | 0.220 | 0.454 | 315 | 177 |
| Left transverse temporal cortex         | -0.115 | 0.022 | 0.220 | 0.454 | 322 | 183 |
| Left entorhinal cortex                  | -0.106 | 0.038 | 0.281 | 0.503 | 287 | 172 |
| Left caudal middle frontal gyrus        | -0.105 | 0.016 | 0.263 | 0.503 | 321 | 183 |
| Left lingual gyrus                      | -0.104 | 0.013 | 0.273 | 0.503 | 321 | 181 |
| Right parahippocampal gyrus             | -0.103 | 0.027 | 0.278 | 0.503 | 317 | 178 |
| Right middle temporal gyrus             | -0.102 | 0.017 | 0.285 | 0.503 | 307 | 179 |
| Left pars opercularis                   | -0.092 | 0.016 | 0.334 | 0.556 | 319 | 180 |
| Right inferior temporal cortex gyrus    | -0.088 | 0.017 | 0.354 | 0.576 | 320 | 178 |
| Left parahippocampal gyrus              | -0.059 | 0.031 | 0.540 | 0.772 | 317 | 175 |
| Right rostral anterior cingulate cortex | -0.059 | 0.028 | 0.537 | 0.772 | 310 | 179 |
| Left postcentral gyrus                  | -0.054 | 0.012 | 0.569 | 0.796 | 312 | 182 |
| Right isthmus cingulate cortex          | -0.049 | 0.022 | 0.605 | 0.830 | 322 | 180 |
| Right postcentral gyrus                 | -0.039 | 0.013 | 0.686 | 0.876 | 309 | 178 |
| Right superior frontal gyrus            | -0.038 | 0.017 | 0.688 | 0.876 | 310 | 179 |
| Right lingual gyrus                     | -0.038 | 0.013 | 0.684 | 0.876 | 323 | 182 |
| Left pars orbitalis                     | -0.033 | 0.025 | 0.729 | 0.895 | 322 | 182 |
| Right fusiform gyrus                    | -0.031 | 0.014 | 0.744 | 0.898 | 314 | 179 |
| Left medial orbitofrontal cortex        | -0.027 | 0.019 | 0.779 | 0.909 | 320 | 179 |
| Right insula                            | -0.022 | 0.019 | 0.818 | 0.938 | 312 | 170 |
| Left superior temporal gyrus            | -0.021 | 0.017 | 0.832 | 0.940 | 304 | 173 |
| Right superior temporal gyrus           | -0.016 | 0.017 | 0.865 | 0.962 | 298 | 176 |
| Right rostral middle frontal gyrus      | -0.012 | 0.015 | 0.901 | 0.968 | 317 | 182 |

|                                               |        |       |       |       |     |     |
|-----------------------------------------------|--------|-------|-------|-------|-----|-----|
| <b>Left rostral middle frontal gyrus</b>      | -0.011 | 0.015 | 0.909 | 0.968 | 321 | 183 |
| <b>Right entorhinal cortex</b>                | -0.010 | 0.039 | 0.917 | 0.968 | 276 | 162 |
| <b>Right transverse temporal cortex</b>       | -0.004 | 0.022 | 0.968 | 0.968 | 320 | 182 |
| <b>Left insula</b>                            | 0.004  | 0.017 | 0.964 | 0.968 | 315 | 171 |
| <b>Left frontal pole</b>                      | 0.004  | 0.034 | 0.965 | 0.968 | 323 | 183 |
| <b>Right pars triangularis</b>                | 0.006  | 0.018 | 0.952 | 0.968 | 321 | 182 |
| <b>Left rostral anterior cingulate cortex</b> | 0.028  | 0.026 | 0.769 | 0.909 | 316 | 178 |
| <b>Left pars triangularis</b>                 | 0.034  | 0.018 | 0.719 | 0.895 | 321 | 180 |
| <b>Left temporal pole</b>                     | 0.042  | 0.041 | 0.659 | 0.876 | 321 | 181 |
| <b>Right temporal pole</b>                    | 0.058  | 0.041 | 0.541 | 0.772 | 322 | 182 |
| <b>Right caudal anterior cingulate cortex</b> | 0.063  | 0.027 | 0.510 | 0.772 | 310 | 181 |
| <b>Right pars orbitalis</b>                   | 0.067  | 0.024 | 0.476 | 0.740 | 322 | 182 |
| <b>Right frontal pole</b>                     | 0.083  | 0.035 | 0.380 | 0.604 | 319 | 183 |
| <b>Left lateral orbitofrontal cortex</b>      | 0.098  | 0.018 | 0.300 | 0.511 | 324 | 182 |
| <b>Right lateral orbitofrontal cortex</b>     | 0.100  | 0.018 | 0.288 | 0.503 | 322 | 183 |
| <b>Right medial orbitofrontal cortex</b>      | 0.145  | 0.020 | 0.127 | 0.349 | 319 | 178 |

**TABLE S10b:** Full mega-analytic results for cortical thickness of each structure for the pediatric unmedicated OCD patients compared with pediatric healthy controls, controlling for age, sex and scan center.

|                                      | Cohen's d <sup>a</sup><br>(NoMed vs HC) | Standard Error | P-value | FDR P-value | N controls | N patients |
|--------------------------------------|-----------------------------------------|----------------|---------|-------------|------------|------------|
| Left inferior parietal cortex        | -0.287                                  | 0.015          | 0.002   | 0.126       | 301        | 210        |
| Right superior parietal cortex       | -0.228                                  | 0.013          | 0.011   | 0.379       | 320        | 217        |
| Left lateral occipital cortex        | -0.207                                  | 0.011          | 0.020   | 0.474       | 319        | 219        |
| Left cuneus                          | -0.182                                  | 0.013          | 0.041   | 0.712       | 320        | 220        |
| Left precuneus                       | -0.155                                  | 0.014          | 0.082   | 0.723       | 320        | 220        |
| Left superior parietal cortex        | -0.151                                  | 0.013          | 0.091   | 0.723       | 317        | 217        |
| Right inferior parietal cortex       | -0.149                                  | 0.015          | 0.098   | 0.723       | 309        | 214        |
| Left posterior cingulate cortex      | -0.142                                  | 0.017          | 0.113   | 0.723       | 320        | 218        |
| Right cortical thickness             | -0.140                                  | 0.010          | 0.114   | 0.723       | 324        | 222        |
| Right rostral middle frontal gyrus   | -0.138                                  | 0.015          | 0.121   | 0.723       | 317        | 220        |
| Left pericalcarine gyrus             | -0.137                                  | 0.014          | 0.123   | 0.723       | 320        | 221        |
| Right pars orbitalis                 | -0.134                                  | 0.023          | 0.131   | 0.723       | 322        | 220        |
| Left cortical thickness              | -0.132                                  | 0.010          | 0.134   | 0.723       | 324        | 222        |
| Left banks superior temporal sulcus  | -0.123                                  | 0.019          | 0.180   | 0.723       | 297        | 208        |
| Right precuneus                      | -0.115                                  | 0.014          | 0.196   | 0.723       | 324        | 221        |
| Left isthmus cingulate cortex        | -0.111                                  | 0.020          | 0.214   | 0.723       | 322        | 219        |
| Left supramarginal gyrus             | -0.111                                  | 0.015          | 0.227   | 0.723       | 299        | 208        |
| Right insula                         | -0.109                                  | 0.018          | 0.226   | 0.723       | 312        | 217        |
| Right lateral occipital cortex       | -0.106                                  | 0.012          | 0.235   | 0.723       | 321        | 218        |
| Right inferior temporal cortex gyrus | -0.105                                  | 0.017          | 0.241   | 0.723       | 320        | 215        |
| Right caudal middle frontal gyrus    | -0.103                                  | 0.017          | 0.252   | 0.723       | 318        | 216        |
| Right postcentral gyrus              | -0.101                                  | 0.013          | 0.262   | 0.723       | 309        | 214        |
| Right banks superior temporal sulcus | -0.100                                  | 0.020          | 0.278   | 0.723       | 298        | 207        |
| Left frontal pole                    | -0.095                                  | 0.034          | 0.282   | 0.723       | 323        | 220        |
| Left medial orbitofrontal cortex     | -0.094                                  | 0.018          | 0.289   | 0.723       | 320        | 219        |

|                                         |        |       |       |       |     |     |
|-----------------------------------------|--------|-------|-------|-------|-----|-----|
| Right superior frontal gyrus            | -0.093 | 0.016 | 0.304 | 0.733 | 310 | 215 |
| Right pars triangularis                 | -0.088 | 0.017 | 0.325 | 0.756 | 321 | 218 |
| Right fusiform gyrus                    | -0.086 | 0.014 | 0.336 | 0.756 | 314 | 217 |
| Right cuneus                            | -0.083 | 0.015 | 0.353 | 0.756 | 323 | 217 |
| Left transverse temporal cortex         | -0.081 | 0.021 | 0.364 | 0.756 | 322 | 219 |
| Left inferior temporal cortex gyrus     | -0.080 | 0.017 | 0.370 | 0.756 | 315 | 219 |
| Right rostral anterior cingulate cortex | -0.078 | 0.027 | 0.384 | 0.756 | 310 | 217 |
| Left postcentral gyrus                  | -0.078 | 0.012 | 0.389 | 0.756 | 312 | 207 |
| Left fusiform gyrus                     | -0.075 | 0.014 | 0.405 | 0.766 | 314 | 218 |
| Right pericalcarine gyrus               | -0.068 | 0.014 | 0.448 | 0.784 | 323 | 217 |
| Left rostral middle frontal gyrus       | -0.066 | 0.014 | 0.459 | 0.784 | 321 | 221 |
| Left paracentral lobule                 | -0.066 | 0.017 | 0.457 | 0.784 | 321 | 221 |
| Left pars orbitalis                     | -0.055 | 0.024 | 0.534 | 0.849 | 322 | 219 |
| Right parahippocampal gyrus             | -0.053 | 0.026 | 0.558 | 0.849 | 317 | 214 |
| Right posterior cingulate cortex        | -0.053 | 0.016 | 0.551 | 0.849 | 322 | 216 |
| Left middle temporal gyrus              | -0.051 | 0.019 | 0.571 | 0.851 | 309 | 214 |
| Left lingual gyrus                      | -0.047 | 0.013 | 0.600 | 0.854 | 321 | 220 |
| Left precentral gyrus                   | -0.047 | 0.014 | 0.602 | 0.854 | 313 | 213 |
| Right precentral gyrus                  | -0.046 | 0.015 | 0.610 | 0.854 | 312 | 215 |
| Right middle temporal gyrus             | -0.043 | 0.018 | 0.635 | 0.871 | 307 | 210 |
| Left caudal middle frontal gyrus        | -0.038 | 0.016 | 0.670 | 0.885 | 321 | 220 |
| Right isthmus cingulate cortex          | -0.036 | 0.020 | 0.683 | 0.885 | 322 | 217 |
| Left pars triangularis                  | -0.032 | 0.017 | 0.714 | 0.899 | 321 | 221 |
| Right entorhinal cortex                 | -0.026 | 0.038 | 0.792 | 0.899 | 276 | 185 |
| Right superior temporal gyrus           | -0.025 | 0.017 | 0.788 | 0.899 | 298 | 210 |
| Left insula                             | -0.024 | 0.016 | 0.788 | 0.899 | 315 | 216 |
| Right temporal pole                     | -0.022 | 0.041 | 0.802 | 0.899 | 322 | 214 |
| Left superior frontal gyrus             | -0.020 | 0.016 | 0.825 | 0.899 | 316 | 216 |
| Right paracentral lobule                | -0.020 | 0.017 | 0.819 | 0.899 | 323 | 220 |

|                                               |        |       |       |       |     |     |
|-----------------------------------------------|--------|-------|-------|-------|-----|-----|
| <b>Left parahippocampal gyrus</b>             | -0.020 | 0.028 | 0.819 | 0.899 | 317 | 218 |
| <b>Left pars opercularis</b>                  | -0.019 | 0.016 | 0.835 | 0.899 | 319 | 217 |
| <b>Right transverse temporal cortex</b>       | -0.012 | 0.021 | 0.889 | 0.915 | 320 | 222 |
| <b>Right frontal pole</b>                     | -0.003 | 0.035 | 0.974 | 0.974 | 319 | 221 |
| <b>Right supramarginal gyrus</b>              | 0.011  | 0.015 | 0.906 | 0.919 | 303 | 209 |
| <b>Right lateral orbitofrontal cortex</b>     | 0.013  | 0.017 | 0.881 | 0.915 | 322 | 220 |
| <b>Left entorhinal cortex</b>                 | 0.014  | 0.036 | 0.885 | 0.915 | 287 | 196 |
| <b>Left temporal pole</b>                     | 0.026  | 0.040 | 0.770 | 0.899 | 321 | 216 |
| <b>Right lingual gyrus</b>                    | 0.029  | 0.013 | 0.741 | 0.899 | 323 | 222 |
| <b>Right pars opercularis</b>                 | 0.037  | 0.017 | 0.681 | 0.885 | 316 | 220 |
| <b>Right caudal anterior cingulate cortex</b> | 0.062  | 0.025 | 0.490 | 0.797 | 310 | 218 |
| <b>Left superior temporal gyrus</b>           | 0.066  | 0.017 | 0.470 | 0.784 | 304 | 206 |
| <b>Right medial orbitofrontal cortex</b>      | 0.067  | 0.019 | 0.455 | 0.784 | 319 | 217 |
| <b>Left caudal anterior cingulate cortex</b>  | 0.101  | 0.026 | 0.263 | 0.723 | 316 | 213 |
| <b>Left lateral orbitofrontal cortex</b>      | 0.106  | 0.017 | 0.232 | 0.723 | 324 | 222 |
| <b>Left rostral anterior cingulate cortex</b> | 0.112  | 0.026 | 0.212 | 0.723 | 316 | 215 |

**TABLE S10c:** Full mega-analytic results for cortical thickness of each structure for the pediatric medicated OCD patients compared with pediatric unmedicated patients, controlling for age, sex and scan center.

|                                       | <b>Cohen's d<sup>a</sup><br/>(NoMed vs Med)</b> | <b>Standard Error</b> | <b>P-value</b> | <b>FDR P-value</b> | <b>N medicated patients</b> | <b>N unmedicated patients</b> |
|---------------------------------------|-------------------------------------------------|-----------------------|----------------|--------------------|-----------------------------|-------------------------------|
| Left caudal anterior cingulate cortex | -0.171                                          | 0.035                 | 0.097          | 0.921              | 181                         | 213                           |
| Left precentral gyrus                 | -0.136                                          | 0.017                 | 0.187          | 0.921              | 182                         | 213                           |
| Right pars opercularis                | -0.102                                          | 0.022                 | 0.323          | 0.921              | 178                         | 220                           |
| Right cuneus                          | -0.094                                          | 0.019                 | 0.362          | 0.921              | 182                         | 217                           |
| Right inferior parietal cortex        | -0.093                                          | 0.019                 | 0.373          | 0.921              | 176                         | 214                           |
| Right supramarginal gyrus             | -0.092                                          | 0.019                 | 0.380          | 0.921              | 176                         | 209                           |
| Left superior frontal gyrus           | -0.090                                          | 0.022                 | 0.386          | 0.921              | 179                         | 216                           |
| Right caudal middle frontal gyrus     | -0.071                                          | 0.023                 | 0.492          | 0.921              | 181                         | 216                           |
| Left superior parietal cortex         | -0.071                                          | 0.017                 | 0.489          | 0.921              | 183                         | 217                           |
| Left entorhinal cortex                | -0.059                                          | 0.046                 | 0.581          | 0.921              | 172                         | 196                           |
| Right precuneus                       | -0.059                                          | 0.018                 | 0.567          | 0.921              | 177                         | 221                           |
| Left precuneus                        | -0.054                                          | 0.018                 | 0.601          | 0.921              | 181                         | 220                           |
| Right paracentral lobule              | -0.054                                          | 0.021                 | 0.600          | 0.921              | 181                         | 220                           |
| Left lateral occipital cortex         | -0.050                                          | 0.015                 | 0.624          | 0.921              | 181                         | 219                           |
| Right pericalcarine gyrus             | -0.049                                          | 0.017                 | 0.634          | 0.921              | 182                         | 217                           |
| Left isthmus cingulate cortex         | -0.046                                          | 0.028                 | 0.656          | 0.921              | 178                         | 219                           |
| Left parahippocampal gyrus            | -0.044                                          | 0.037                 | 0.673          | 0.921              | 175                         | 218                           |
| Right isthmus cingulate cortex        | -0.044                                          | 0.026                 | 0.670          | 0.921              | 180                         | 217                           |
| Left paracentral lobule               | -0.043                                          | 0.021                 | 0.675          | 0.921              | 180                         | 221                           |
| Left supramarginal gyrus              | -0.032                                          | 0.020                 | 0.763          | 0.921              | 173                         | 208                           |
| Left caudal middle frontal gyrus      | -0.024                                          | 0.022                 | 0.816          | 0.929              | 183                         | 220                           |
| Right banks superior temporal sulcus  | -0.007                                          | 0.025                 | 0.950          | 0.981              | 175                         | 207                           |
| Left pars opercularis                 | -0.007                                          | 0.021                 | 0.948          | 0.981              | 180                         | 217                           |
| Right parahippocampal gyrus           | -0.005                                          | 0.036                 | 0.961          | 0.981              | 178                         | 214                           |
| Right superior parietal cortex        | 0.002                                           | 0.017                 | 0.981          | 0.981              | 182                         | 217                           |



|                                         |       |       |       |       |     |     |
|-----------------------------------------|-------|-------|-------|-------|-----|-----|
| Right precentral gyrus                  | 0.004 | 0.019 | 0.971 | 0.981 | 178 | 215 |
| Left lingual gyrus                      | 0.010 | 0.017 | 0.921 | 0.981 | 181 | 220 |
| Left rostral anterior cingulate cortex  | 0.015 | 0.036 | 0.887 | 0.970 | 178 | 215 |
| Right lateral occipital cortex          | 0.021 | 0.016 | 0.835 | 0.929 | 181 | 218 |
| Right middle temporal gyrus             | 0.022 | 0.023 | 0.836 | 0.929 | 179 | 210 |
| Right superior temporal gyrus           | 0.024 | 0.022 | 0.817 | 0.929 | 176 | 210 |
| Right lingual gyrus                     | 0.027 | 0.017 | 0.792 | 0.929 | 182 | 222 |
| Right caudal anterior cingulate cortex  | 0.032 | 0.033 | 0.753 | 0.921 | 181 | 218 |
| Left superior temporal gyrus            | 0.032 | 0.022 | 0.762 | 0.921 | 173 | 206 |
| Left banks superior temporal sulcus     | 0.034 | 0.024 | 0.749 | 0.921 | 160 | 208 |
| Left cortical thickness                 | 0.035 | 0.013 | 0.728 | 0.921 | 183 | 222 |
| Right superior frontal gyrus            | 0.036 | 0.022 | 0.729 | 0.921 | 179 | 215 |
| Left postcentral gyrus                  | 0.039 | 0.016 | 0.704 | 0.921 | 182 | 207 |
| Right posterior cingulate cortex        | 0.039 | 0.020 | 0.707 | 0.921 | 182 | 216 |
| Left cuneus                             | 0.040 | 0.016 | 0.694 | 0.921 | 181 | 220 |
| Left middle temporal gyrus              | 0.043 | 0.023 | 0.681 | 0.921 | 173 | 214 |
| Right insula                            | 0.051 | 0.023 | 0.628 | 0.921 | 170 | 217 |
| Right transverse temporal cortex        | 0.052 | 0.028 | 0.612 | 0.921 | 182 | 222 |
| Left pericalcarine gyrus                | 0.053 | 0.018 | 0.605 | 0.921 | 179 | 221 |
| Left fusiform gyrus                     | 0.054 | 0.018 | 0.600 | 0.921 | 179 | 218 |
| Left inferior temporal cortex gyrus     | 0.057 | 0.023 | 0.578 | 0.921 | 177 | 219 |
| Right fusiform gyrus                    | 0.062 | 0.018 | 0.550 | 0.921 | 179 | 217 |
| Right frontal pole                      | 0.063 | 0.042 | 0.538 | 0.921 | 183 | 221 |
| Right rostral anterior cingulate cortex | 0.065 | 0.034 | 0.531 | 0.921 | 179 | 217 |
| Right postcentral gyrus                 | 0.066 | 0.016 | 0.522 | 0.921 | 178 | 214 |
| Right cortical thickness                | 0.066 | 0.013 | 0.517 | 0.921 | 183 | 222 |
| Left lateral orbitofrontal cortex       | 0.082 | 0.024 | 0.424 | 0.921 | 182 | 222 |
| Left frontal pole                       | 0.083 | 0.046 | 0.418 | 0.921 | 183 | 220 |
| Left inferior parietal cortex           | 0.087 | 0.019 | 0.407 | 0.921 | 173 | 210 |

|                                             |       |       |       |       |     |     |
|---------------------------------------------|-------|-------|-------|-------|-----|-----|
| <b>Left rostral middle frontal gyrus</b>    | 0.090 | 0.019 | 0.376 | 0.921 | 183 | 221 |
| <b>Right entorhinal cortex</b>              | 0.093 | 0.047 | 0.399 | 0.921 | 162 | 185 |
| <b>Right lateral orbitofrontal cortex</b>   | 0.098 | 0.022 | 0.336 | 0.921 | 183 | 220 |
| <b>Left pars triangularis</b>               | 0.102 | 0.023 | 0.319 | 0.921 | 180 | 221 |
| <b>Right medial orbitofrontal cortex</b>    | 0.102 | 0.026 | 0.324 | 0.921 | 178 | 217 |
| <b>Left temporal pole</b>                   | 0.104 | 0.052 | 0.311 | 0.921 | 181 | 216 |
| <b>Left medial orbitofrontal cortex</b>     | 0.105 | 0.025 | 0.305 | 0.921 | 179 | 219 |
| <b>Right rostral middle frontal gyrus</b>   | 0.107 | 0.020 | 0.295 | 0.921 | 182 | 220 |
| <b>Right pars triangularis</b>              | 0.117 | 0.022 | 0.255 | 0.921 | 182 | 218 |
| <b>Left transverse temporal cortex</b>      | 0.121 | 0.028 | 0.238 | 0.921 | 183 | 219 |
| <b>Left pars orbitalis</b>                  | 0.128 | 0.032 | 0.211 | 0.921 | 182 | 219 |
| <b>Left insula</b>                          | 0.134 | 0.021 | 0.199 | 0.921 | 171 | 216 |
| <b>Left posterior cingulate cortex</b>      | 0.136 | 0.022 | 0.186 | 0.921 | 181 | 218 |
| <b>Right inferior temporal cortex gyrus</b> | 0.157 | 0.022 | 0.130 | 0.921 | 178 | 215 |
| <b>Right temporal pole</b>                  | 0.186 | 0.053 | 0.071 | 0.921 | 182 | 214 |
| <b>Right pars orbitalis</b>                 | 0.196 | 0.029 | 0.056 | 0.921 | 182 | 220 |

**TABLE S11a:** Full mega-analytic results for surface area of each structure for the pediatric medicated OCD patients compared with pediatric healthy controls, controlling for age, sex, scan center and ICV.

|                                               | <b>Cohen's d<sup>a</sup><br/>(Med vs HC)</b> | <b>Standard Error</b> | <b>P-value</b> | <b>FDR P-value</b> | <b>N controls</b> | <b>N patients</b> |
|-----------------------------------------------|----------------------------------------------|-----------------------|----------------|--------------------|-------------------|-------------------|
| <b>Right medial orbitofrontal cortex</b>      | -0.330                                       | 18.152                | 0.001          | 0.035              | 319               | 177               |
| <b>Left medial orbitofrontal cortex</b>       | -0.314                                       | 21.557                | 0.001          | 0.035              | 320               | 178               |
| <b>Right posterior cingulate cortex</b>       | -0.294                                       | 15.952                | 0.002          | 0.038              | 322               | 181               |
| <b>Left rostral middle frontal gyrus</b>      | -0.290                                       | 60.285                | 0.002          | 0.038              | 321               | 182               |
| <b>Right paracentral lobule</b>               | -0.282                                       | 20.023                | 0.003          | 0.041              | 323               | 180               |
| <b>Right superior frontal gyrus</b>           | -0.276                                       | 63.405                | 0.004          | 0.042              | 310               | 178               |
| <b>Right cuneus</b>                           | -0.270                                       | 19.973                | 0.004          | 0.042              | 323               | 181               |
| <b>Left lateral orbitofrontal cortex</b>      | -0.220                                       | 26.497                | 0.020          | 0.173              | 324               | 181               |
| <b>Left precuneus</b>                         | -0.216                                       | 38.360                | 0.023          | 0.174              | 320               | 180               |
| <b>Right pars orbitalis</b>                   | -0.209                                       | 9.465                 | 0.027          | 0.184              | 322               | 181               |
| <b>Left posterior cingulate cortex</b>        | -0.201                                       | 16.963                | 0.035          | 0.184              | 320               | 180               |
| <b>Right pericalcarine gyrus</b>              | -0.197                                       | 23.425                | 0.037          | 0.184              | 323               | 181               |
| <b>Left postcentral gyrus</b>                 | -0.196                                       | 40.052                | 0.040          | 0.184              | 312               | 181               |
| <b>Right surface area</b>                     | -0.194                                       | 494.231               | 0.040          | 1.000              | 324               | 182               |
| <b>Left superior parietal cortex</b>          | -0.192                                       | 52.199                | 0.043          | 0.184              | 317               | 182               |
| <b>Left superior frontal gyrus</b>            | -0.192                                       | 61.293                | 0.044          | 0.184              | 316               | 178               |
| <b>Left surface area</b>                      | -0.191                                       | 487.329               | 0.043          | 1.000              | 324               | 182               |
| <b>Right pars triangularis</b>                | -0.189                                       | 22.087                | 0.046          | 0.184              | 321               | 181               |
| <b>Right rostral middle frontal gyrus</b>     | -0.182                                       | 63.049                | 0.055          | 0.209              | 317               | 181               |
| <b>Left paracentral lobule</b>                | -0.179                                       | 17.728                | 0.059          | 0.211              | 321               | 179               |
| <b>Left inferior parietal cortex</b>          | -0.176                                       | 52.117                | 0.071          | 0.237              | 301               | 172               |
| <b>Right lingual gyrus</b>                    | -0.169                                       | 37.862                | 0.073          | 0.237              | 323               | 181               |
| <b>Right lateral occipital cortex</b>         | -0.167                                       | 49.608                | 0.078          | 0.242              | 321               | 180               |
| <b>Left middle temporal gyrus</b>             | -0.163                                       | 30.967                | 0.093          | 0.274              | 309               | 172               |
| <b>Left rostral anterior cingulate cortex</b> | -0.155                                       | 13.939                | 0.104          | 0.295              | 316               | 177               |

|                                        |        |        |       |       |     |     |
|----------------------------------------|--------|--------|-------|-------|-----|-----|
| Left pericalcarine gyrus               | -0.144 | 21.763 | 0.130 | 0.339 | 320 | 178 |
| Left caudal anterior cingulate cortex  | -0.144 | 12.832 | 0.129 | 0.339 | 316 | 180 |
| Right superior parietal cortex         | -0.135 | 52.119 | 0.155 | 0.376 | 320 | 181 |
| Right lateral orbitofrontal cortex     | -0.135 | 27.181 | 0.152 | 0.376 | 322 | 182 |
| Right supramarginal gyrus              | -0.134 | 47.556 | 0.165 | 0.388 | 303 | 175 |
| Left pars orbitalis                    | -0.128 | 8.094  | 0.174 | 0.395 | 322 | 181 |
| Left lateral occipital cortex          | -0.127 | 48.290 | 0.182 | 0.399 | 319 | 180 |
| Left insula                            | -0.125 | 21.593 | 0.195 | 0.415 | 315 | 170 |
| Left cuneus                            | -0.118 | 18.699 | 0.212 | 0.438 | 320 | 180 |
| Right postcentral gyrus                | -0.115 | 38.883 | 0.230 | 0.459 | 309 | 177 |
| Right inferior parietal cortex         | -0.109 | 60.067 | 0.260 | 0.470 | 309 | 175 |
| Left caudal middle frontal gyrus       | -0.106 | 34.999 | 0.263 | 0.470 | 321 | 182 |
| Right isthmus cingulate cortex         | -0.103 | 12.843 | 0.276 | 0.481 | 322 | 179 |
| Right insula                           | -0.090 | 21.370 | 0.356 | 0.604 | 312 | 169 |
| Left pars opercularis                  | -0.086 | 24.325 | 0.364 | 0.604 | 319 | 179 |
| Right middle temporal gyrus            | -0.078 | 35.446 | 0.414 | 0.651 | 307 | 178 |
| Right fusiform gyrus                   | -0.078 | 34.032 | 0.412 | 0.651 | 314 | 178 |
| Right pars opercularis                 | -0.067 | 21.076 | 0.486 | 0.735 | 316 | 177 |
| Right caudal middle frontal gyrus      | -0.060 | 34.662 | 0.526 | 0.778 | 318 | 180 |
| Left lingual gyrus                     | -0.053 | 38.439 | 0.579 | 0.820 | 321 | 180 |
| Right precuneus                        | -0.053 | 40.681 | 0.576 | 0.820 | 324 | 176 |
| Right caudal anterior cingulate cortex | -0.047 | 13.607 | 0.622 | 0.827 | 310 | 180 |
| Left fusiform gyrus                    | -0.043 | 35.748 | 0.649 | 0.827 | 314 | 178 |
| Right parahippocampal gyrus            | -0.029 | 9.623  | 0.759 | 0.889 | 317 | 177 |
| Right inferior temporal cortex gyrus   | -0.025 | 39.221 | 0.797 | 0.903 | 320 | 177 |
| Left precentral gyrus                  | -0.013 | 41.175 | 0.891 | 0.946 | 313 | 181 |
| Left isthmus cingulate cortex          | -0.001 | 14.652 | 0.993 | 0.993 | 322 | 178 |
| Right entorhinal cortex                | 0.001  | 7.769  | 0.993 | 0.993 | 276 | 161 |
| Left entorhinal cortex                 | 0.006  | 7.613  | 0.953 | 0.982 | 287 | 171 |

|                                         |       |        |       |       |     |     |
|-----------------------------------------|-------|--------|-------|-------|-----|-----|
| Left pars triangularis                  | 0.008 | 18.768 | 0.936 | 0.979 | 321 | 179 |
| Left banks superior temporal sulcus     | 0.017 | 17.174 | 0.868 | 0.937 | 297 | 159 |
| Left supramarginal gyrus                | 0.020 | 47.351 | 0.837 | 0.918 | 299 | 172 |
| Right transverse temporal cortex        | 0.021 | 5.367  | 0.826 | 0.918 | 320 | 181 |
| Left superior temporal gyrus            | 0.028 | 36.296 | 0.772 | 0.890 | 304 | 172 |
| Left inferior temporal cortex gyrus     | 0.036 | 43.414 | 0.707 | 0.844 | 315 | 176 |
| Left frontal pole                       | 0.039 | 3.476  | 0.676 | 0.827 | 323 | 182 |
| Right temporal pole                     | 0.039 | 6.059  | 0.681 | 0.827 | 322 | 181 |
| Right superior temporal gyrus           | 0.040 | 32.804 | 0.681 | 0.827 | 298 | 175 |
| Left parahippocampal gyrus              | 0.041 | 10.538 | 0.673 | 0.827 | 317 | 174 |
| Right banks superior temporal sulcus    | 0.047 | 13.058 | 0.625 | 0.827 | 298 | 174 |
| Right precentral gyrus                  | 0.049 | 40.041 | 0.611 | 0.827 | 312 | 177 |
| Left temporal pole                      | 0.076 | 6.375  | 0.421 | 0.651 | 321 | 180 |
| Left transverse temporal cortex         | 0.106 | 6.650  | 0.261 | 0.470 | 322 | 182 |
| Right rostral anterior cingulate cortex | 0.110 | 12.145 | 0.250 | 0.470 | 310 | 178 |
| Right frontal pole                      | 0.201 | 4.471  | 0.034 | 0.184 | 319 | 182 |

**TABLE S11b:** Full mega-analytic results for surface area of each structure for the pediatric unmedicated OCD patients compared with pediatric healthy controls, controlling for age, sex, scan center and ICV.

|                                         | <b>Cohen's d<sup>a</sup><br/>(NoMed vs HC)</b> | <b>Standard Error</b> | <b>P-value</b> | <b>FDR P-value</b> | <b>N controls</b> | <b>N patients</b> |
|-----------------------------------------|------------------------------------------------|-----------------------|----------------|--------------------|-------------------|-------------------|
| Left posterior cingulate cortex         | -0.221                                         | 14.950                | 0.014          | 0.491              | 320               | 218               |
| Left inferior parietal cortex           | -0.210                                         | 46.501                | 0.022          | 0.491              | 301               | 210               |
| Right medial orbitofrontal cortex       | -0.208                                         | 17.295                | 0.021          | 0.491              | 319               | 217               |
| Right paracentral lobule                | -0.180                                         | 18.189                | 0.043          | 0.585              | 323               | 220               |
| Left paracentral lobule                 | -0.166                                         | 15.786                | 0.062          | 0.700              | 321               | 221               |
| Left lateral orbitofrontal cortex       | -0.154                                         | 23.860                | 0.083          | 0.797              | 324               | 222               |
| Right fusiform gyrus                    | -0.151                                         | 31.535                | 0.094          | 0.797              | 314               | 217               |
| Right rostral middle frontal gyrus      | -0.139                                         | 58.473                | 0.118          | 0.831              | 317               | 220               |
| Left superior frontal gyrus             | -0.112                                         | 55.223                | 0.212          | 0.980              | 316               | 216               |
| Left insula                             | -0.110                                         | 17.837                | 0.220          | 0.980              | 315               | 216               |
| Left medial orbitofrontal cortex        | -0.102                                         | 19.751                | 0.254          | 0.980              | 320               | 219               |
| Right superior frontal gyrus            | -0.102                                         | 59.910                | 0.259          | 0.980              | 310               | 215               |
| Left rostral middle frontal gyrus       | -0.100                                         | 56.096                | 0.258          | 0.980              | 321               | 221               |
| Right superior temporal gyrus           | -0.094                                         | 29.763                | 0.306          | 0.980              | 298               | 210               |
| Left pars orbitalis                     | -0.091                                         | 7.119                 | 0.308          | 0.980              | 322               | 219               |
| Right posterior cingulate cortex        | -0.086                                         | 14.942                | 0.336          | 0.980              | 322               | 216               |
| Right lateral orbitofrontal cortex      | -0.084                                         | 25.235                | 0.347          | 0.980              | 322               | 220               |
| Right inferior parietal cortex          | -0.078                                         | 55.860                | 0.388          | 0.980              | 309               | 214               |
| Left caudal anterior cingulate cortex   | -0.075                                         | 11.978                | 0.407          | 0.980              | 316               | 213               |
| Left rostral anterior cingulate cortex  | -0.072                                         | 13.019                | 0.425          | 0.980              | 316               | 215               |
| Right rostral anterior cingulate cortex | -0.072                                         | 10.730                | 0.422          | 0.980              | 310               | 217               |
| Left middle temporal gyrus              | -0.070                                         | 29.235                | 0.440          | 0.980              | 309               | 214               |
| Right surface area                      | -0.061                                         | 452.719               | 0.488          | 1.000              | 324               | 222               |
| Left banks superior temporal sulcus     | -0.057                                         | 15.323                | 0.536          | 0.980              | 297               | 208               |
| Right superior parietal cortex          | -0.056                                         | 50.867                | 0.530          | 0.980              | 320               | 217               |

|                                        |        |         |       |       |     |     |
|----------------------------------------|--------|---------|-------|-------|-----|-----|
| Left pericalcarine gyrus               | -0.051 | 19.992  | 0.567 | 0.980 | 320 | 221 |
| Left pars opercularis                  | -0.051 | 22.943  | 0.565 | 0.980 | 319 | 217 |
| Left postcentral gyrus                 | -0.050 | 38.609  | 0.581 | 0.980 | 312 | 207 |
| Left cuneus                            | -0.049 | 17.541  | 0.580 | 0.980 | 320 | 220 |
| Right parahippocampal gyrus            | -0.043 | 8.947   | 0.632 | 0.980 | 317 | 214 |
| Right lateral occipital cortex         | -0.034 | 45.979  | 0.705 | 0.980 | 321 | 218 |
| Left surface area                      | -0.033 | 441.200 | 0.712 | 1.000 | 324 | 222 |
| Right pars orbitalis                   | -0.031 | 8.802   | 0.724 | 0.980 | 322 | 220 |
| Left superior temporal gyrus           | -0.027 | 32.054  | 0.771 | 0.980 | 304 | 206 |
| Right middle temporal gyrus            | -0.027 | 32.727  | 0.768 | 0.980 | 307 | 210 |
| Left frontal pole                      | -0.024 | 3.201   | 0.783 | 0.980 | 323 | 220 |
| Right pars triangularis                | -0.023 | 20.914  | 0.799 | 0.980 | 321 | 218 |
| Left transverse temporal cortex        | -0.022 | 6.087   | 0.807 | 0.980 | 322 | 219 |
| Right temporal pole                    | -0.022 | 5.853   | 0.803 | 0.980 | 322 | 214 |
| Left lingual gyrus                     | -0.019 | 35.460  | 0.835 | 0.980 | 321 | 220 |
| Right banks superior temporal sulcus   | -0.012 | 11.837  | 0.899 | 0.983 | 298 | 207 |
| Left precentral gyrus                  | -0.006 | 37.536  | 0.945 | 0.983 | 313 | 213 |
| Left precuneus                         | -0.002 | 35.062  | 0.983 | 0.983 | 320 | 220 |
| Left fusiform gyrus                    | 0.003  | 32.759  | 0.969 | 0.983 | 314 | 218 |
| Right insula                           | 0.003  | 18.937  | 0.970 | 0.983 | 312 | 217 |
| Right caudal anterior cingulate cortex | 0.005  | 12.483  | 0.953 | 0.983 | 310 | 218 |
| Right pars opercularis                 | 0.007  | 18.793  | 0.941 | 0.983 | 316 | 220 |
| Left inferior temporal cortex gyrus    | 0.011  | 39.893  | 0.902 | 0.983 | 315 | 219 |
| Right inferior temporal cortex gyrus   | 0.012  | 36.531  | 0.889 | 0.983 | 320 | 215 |
| Left parahippocampal gyrus             | 0.017  | 9.643   | 0.846 | 0.980 | 317 | 218 |
| Right precentral gyrus                 | 0.017  | 36.797  | 0.850 | 0.980 | 312 | 215 |
| Left entorhinal cortex                 | 0.018  | 7.272   | 0.848 | 0.980 | 287 | 196 |
| Right lingual gyrus                    | 0.019  | 35.574  | 0.832 | 0.980 | 323 | 222 |
| Right cuneus                           | 0.025  | 18.142  | 0.780 | 0.980 | 323 | 217 |

|                                   |       |        |       |       |     |     |
|-----------------------------------|-------|--------|-------|-------|-----|-----|
| Right precuneus                   | 0.037 | 36.897 | 0.678 | 0.980 | 324 | 221 |
| Right postcentral gyrus           | 0.038 | 36.007 | 0.672 | 0.980 | 309 | 214 |
| Right supramarginal gyrus         | 0.039 | 41.739 | 0.670 | 0.980 | 303 | 209 |
| Left caudal middle frontal gyrus  | 0.040 | 31.975 | 0.654 | 0.980 | 321 | 220 |
| Left superior parietal cortex     | 0.043 | 50.940 | 0.631 | 0.980 | 317 | 217 |
| Right caudal middle frontal gyrus | 0.057 | 30.266 | 0.523 | 0.980 | 318 | 216 |
| Right frontal pole                | 0.060 | 4.092  | 0.497 | 0.980 | 319 | 221 |
| Left supramarginal gyrus          | 0.067 | 42.311 | 0.462 | 0.980 | 299 | 208 |
| Right transverse temporal cortex  | 0.069 | 4.961  | 0.436 | 0.980 | 320 | 222 |
| Left pars triangularis            | 0.077 | 16.257 | 0.388 | 0.980 | 321 | 221 |
| Right pericalcarine gyrus         | 0.096 | 21.614 | 0.281 | 0.980 | 323 | 217 |
| Right entorhinal cortex           | 0.123 | 7.802  | 0.206 | 0.980 | 276 | 185 |
| Right isthmus cingulate cortex    | 0.125 | 12.423 | 0.161 | 0.913 | 322 | 217 |
| Left lateral occipital cortex     | 0.130 | 43.700 | 0.146 | 0.905 | 319 | 219 |
| Left temporal pole                | 0.138 | 5.916  | 0.122 | 0.831 | 321 | 216 |
| Left isthmus cingulate cortex     | 0.193 | 13.926 | 0.030 | 0.518 | 322 | 219 |



**TABLE S11c:** Full mega-analytic results for surface area of each structure for the pediatric medicated OCD patients compared with pediatric unmedicated patients, controlling for age, sex, scan center and ICV.

|                                   | <b>Cohen's d<sup>a</sup><br/>(NoMed vs Med)</b> | <b>Standard Error</b> | <b>P-value</b> | <b>FDR P-value</b> | <b>N medicated patients</b> | <b>N unmedicated patients</b> |
|-----------------------------------|-------------------------------------------------|-----------------------|----------------|--------------------|-----------------------------|-------------------------------|
| Right pericalcarine gyrus         | -0.406                                          | 26.388                | 9.359E-05      | 0.006              | 181                         | 217                           |
| Right lingual gyrus               | -0.341                                          | 45.382                | 0.001          | 0.031              | 181                         | 222                           |
| Left lateral occipital cortex     | -0.302                                          | 59.031                | 0.003          | 0.079              | 180                         | 219                           |
| Right cuneus                      | -0.271                                          | 24.090                | 0.009          | 0.147              | 181                         | 217                           |
| Left superior parietal cortex     | -0.261                                          | 69.227                | 0.011          | 0.156              | 182                         | 217                           |
| Right isthmus cingulate cortex    | -0.223                                          | 16.475                | 0.031          | 0.294              | 179                         | 217                           |
| Left precuneus                    | -0.215                                          | 47.394                | 0.036          | 0.294              | 180                         | 220                           |
| Right superior frontal gyrus      | -0.210                                          | 80.957                | 0.043          | 0.294              | 178                         | 215                           |
| Right precuneus                   | -0.210                                          | 49.530                | 0.042          | 0.294              | 176                         | 221                           |
| Left isthmus cingulate cortex     | -0.205                                          | 18.497                | 0.048          | 0.295              | 178                         | 219                           |
| Left surface area                 | -0.191                                          | 622.307               | 0.062          | 1.000              | 182                         | 222                           |
| Right postcentral gyrus           | -0.191                                          | 49.123                | 0.066          | 0.374              | 177                         | 214                           |
| Right lateral occipital cortex    | -0.173                                          | 60.926                | 0.092          | 0.484              | 180                         | 218                           |
| Left postcentral gyrus            | -0.167                                          | 49.248                | 0.109          | 0.495              | 181                         | 207                           |
| Left pars triangularis            | -0.167                                          | 22.161                | 0.104          | 0.495              | 179                         | 221                           |
| Right surface area                | -0.156                                          | 634.543               | 0.128          | 1.000              | 182                         | 222                           |
| Left pericalcarine gyrus          | -0.154                                          | 26.632                | 0.134          | 0.569              | 178                         | 221                           |
| Left rostral middle frontal gyrus | -0.150                                          | 73.067                | 0.142          | 0.569              | 182                         | 221                           |
| Left lingual gyrus                | -0.141                                          | 47.125                | 0.172          | 0.648              | 180                         | 220                           |
| Left supramarginal gyrus          | -0.140                                          | 60.379                | 0.184          | 0.660              | 172                         | 208                           |
| Right posterior cingulate cortex  | -0.129                                          | 19.102                | 0.212          | 0.684              | 181                         | 216                           |
| Left caudal middle frontal gyrus  | -0.126                                          | 40.234                | 0.217          | 0.684              | 182                         | 220                           |
| Right parahippocampal gyrus       | -0.122                                          | 12.663                | 0.241          | 0.684              | 177                         | 214                           |
| Right transverse temporal cortex  | -0.121                                          | 7.150                 | 0.237          | 0.684              | 181                         | 222                           |
| Left cuneus                       | -0.114                                          | 22.832                | 0.269          | 0.731              | 180                         | 220                           |

|                                        |        |        |       |       |     |     |
|----------------------------------------|--------|--------|-------|-------|-----|-----|
| Left pars opercularis                  | -0.112 | 30.253 | 0.280 | 0.731 | 179 | 217 |
| Right entorhinal cortex                | -0.106 | 9.489  | 0.337 | 0.778 | 161 | 185 |
| Right pars orbitalis                   | -0.101 | 11.533 | 0.324 | 0.778 | 181 | 220 |
| Right pars triangularis                | -0.097 | 26.241 | 0.343 | 0.778 | 181 | 218 |
| Right pars opercularis                 | -0.095 | 25.062 | 0.359 | 0.788 | 177 | 220 |
| Right superior parietal cortex         | -0.090 | 68.698 | 0.380 | 0.808 | 181 | 217 |
| Right caudal middle frontal gyrus      | -0.088 | 39.786 | 0.394 | 0.812 | 180 | 216 |
| Left rostral anterior cingulate cortex | -0.081 | 17.923 | 0.434 | 0.817 | 177 | 215 |
| Left fusiform gyrus                    | -0.079 | 44.566 | 0.445 | 0.817 | 178 | 218 |
| Right medial orbitofrontal cortex      | -0.077 | 22.888 | 0.458 | 0.817 | 177 | 217 |
| Right precentral gyrus                 | -0.076 | 49.066 | 0.464 | 0.817 | 177 | 215 |
| Right rostral middle frontal gyrus     | -0.074 | 78.651 | 0.473 | 0.817 | 181 | 220 |
| Right paracentral lobule               | -0.071 | 24.357 | 0.490 | 0.817 | 180 | 220 |
| Left medial orbitofrontal cortex       | -0.069 | 27.189 | 0.504 | 0.817 | 178 | 219 |
| Left paracentral lobule                | -0.066 | 19.843 | 0.522 | 0.817 | 179 | 221 |
| Left lateral orbitofrontal cortex      | -0.062 | 35.356 | 0.544 | 0.817 | 181 | 222 |
| Right supramarginal gyrus              | -0.062 | 56.307 | 0.552 | 0.817 | 175 | 209 |
| Left middle temporal gyrus             | -0.062 | 41.198 | 0.552 | 0.817 | 172 | 214 |
| Left parahippocampal gyrus             | -0.056 | 12.178 | 0.591 | 0.851 | 174 | 218 |
| Right inferior parietal cortex         | -0.053 | 76.344 | 0.613 | 0.851 | 175 | 214 |
| Left entorhinal cortex                 | -0.051 | 9.784  | 0.632 | 0.859 | 171 | 196 |
| Left superior frontal gyrus            | -0.047 | 73.795 | 0.646 | 0.862 | 178 | 216 |
| Left precentral gyrus                  | -0.038 | 49.110 | 0.710 | 0.911 | 181 | 213 |
| Left frontal pole                      | -0.036 | 4.499  | 0.726 | 0.914 | 182 | 220 |
| Right middle temporal gyrus            | -0.033 | 43.176 | 0.750 | 0.927 | 178 | 210 |
| Left superior temporal gyrus           | -0.017 | 44.449 | 0.875 | 0.969 | 172 | 206 |
| Left insula                            | -0.013 | 25.371 | 0.901 | 0.969 | 170 | 216 |
| Right fusiform gyrus                   | -0.012 | 41.064 | 0.907 | 0.969 | 178 | 217 |
| Left posterior cingulate cortex        | -0.011 | 19.951 | 0.912 | 0.969 | 180 | 218 |

|                                                |        |        |       |       |     |     |
|------------------------------------------------|--------|--------|-------|-------|-----|-----|
| <b>Left caudal anterior cingulate cortex</b>   | -0.009 | 15.609 | 0.930 | 0.969 | 180 | 213 |
| <b>Left pars orbitalis</b>                     | 0.004  | 9.377  | 0.971 | 0.971 | 181 | 219 |
| <b>Left temporal pole</b>                      | 0.005  | 7.766  | 0.959 | 0.971 | 180 | 216 |
| <b>Right frontal pole</b>                      | 0.008  | 4.953  | 0.937 | 0.969 | 182 | 221 |
| <b>Right lateral orbitofrontal cortex</b>      | 0.008  | 34.378 | 0.940 | 0.969 | 182 | 220 |
| <b>Left transverse temporal cortex</b>         | 0.023  | 8.024  | 0.820 | 0.948 | 182 | 219 |
| <b>Right caudal anterior cingulate cortex</b>  | 0.024  | 16.099 | 0.813 | 0.948 | 180 | 218 |
| <b>Left banks superior temporal sulcus</b>     | 0.024  | 20.759 | 0.822 | 0.948 | 159 | 208 |
| <b>Right insula</b>                            | 0.027  | 27.447 | 0.797 | 0.948 | 169 | 217 |
| <b>Right inferior temporal cortex gyrus</b>    | 0.045  | 49.189 | 0.663 | 0.867 | 177 | 215 |
| <b>Right banks superior temporal sulcus</b>    | 0.054  | 16.461 | 0.609 | 0.851 | 174 | 207 |
| <b>Left inferior parietal cortex</b>           | 0.063  | 63.917 | 0.549 | 0.817 | 172 | 210 |
| <b>Left inferior temporal cortex gyrus</b>     | 0.080  | 50.124 | 0.441 | 0.817 | 176 | 219 |
| <b>Right superior temporal gyrus</b>           | 0.104  | 40.257 | 0.321 | 0.778 | 175 | 210 |
| <b>Right temporal pole</b>                     | 0.123  | 7.144  | 0.235 | 0.684 | 181 | 214 |
| <b>Right rostral anterior cingulate cortex</b> | 0.216  | 15.060 | 0.037 | 0.294 | 178 | 217 |

**TABLE S12a:** Full mega-analytic results for cortical thickness of each structure for the adult OCD patients with current comorbid depression compared with adult healthy controls, controlling for age, sex and scan center.

|                                     | <b>Cohen's d<sup>a</sup><br/>(CurDep vs HC)</b> | <b>Standard Error</b> | <b>P-value</b> | <b>FDR P-value</b> | <b>N controls</b> | <b>N patients</b> |
|-------------------------------------|-------------------------------------------------|-----------------------|----------------|--------------------|-------------------|-------------------|
| Left middle temporal gyrus          | -0.223                                          | 0.015                 | 0.012          | 0.210              | 1320              | 145               |
| Right inferior parietal cortex      | -0.221                                          | 0.011                 | 0.009          | 0.210              | 1379              | 160               |
| Left rostral middle frontal gyrus   | -0.211                                          | 0.012                 | 0.011          | 0.210              | 1429              | 166               |
| Right pars orbitalis                | -0.208                                          | 0.019                 | 0.012          | 0.210              | 1431              | 166               |
| Right medial orbitofrontal cortex   | -0.199                                          | 0.015                 | 0.017          | 0.240              | 1428              | 164               |
| Right middle temporal gyrus         | -0.185                                          | 0.013                 | 0.027          | 0.249              | 1402              | 161               |
| Right lateral orbitofrontal cortex  | -0.182                                          | 0.015                 | 0.028          | 0.249              | 1431              | 167               |
| Left parahippocampal gyrus          | -0.176                                          | 0.026                 | 0.033          | 0.259              | 1424              | 167               |
| Right fusiform gyrus                | -0.164                                          | 0.013                 | 0.054          | 0.326              | 1428              | 156               |
| Left cortical thickness             | -0.158                                          | 0.008                 | 0.056          | 0.326              | 1435              | 167               |
| Left fusiform gyrus                 | -0.158                                          | 0.012                 | 0.056          | 0.326              | 1428              | 167               |
| Left lingual gyrus                  | -0.155                                          | 0.011                 | 0.061          | 0.329              | 1427              | 167               |
| Left inferior parietal cortex       | -0.149                                          | 0.011                 | 0.075          | 0.373              | 1364              | 162               |
| Left pars triangularis              | -0.145                                          | 0.013                 | 0.080          | 0.373              | 1434              | 166               |
| Left pars opercularis               | -0.135                                          | 0.012                 | 0.105          | 0.433              | 1427              | 165               |
| Left lateral occipital cortex       | -0.135                                          | 0.012                 | 0.104          | 0.433              | 1419              | 166               |
| Right pars triangularis             | -0.133                                          | 0.014                 | 0.119          | 0.437              | 1423              | 157               |
| Right parahippocampal gyrus         | -0.129                                          | 0.022                 | 0.120          | 0.437              | 1420              | 166               |
| Left banks superior temporal sulcus | -0.124                                          | 0.015                 | 0.157          | 0.437              | 1284              | 148               |
| Right cortical thickness            | -0.123                                          | 0.008                 | 0.137          | 0.437              | 1435              | 165               |
| Right rostral middle frontal gyrus  | -0.117                                          | 0.011                 | 0.157          | 0.437              | 1424              | 167               |
| Left insula                         | -0.117                                          | 0.014                 | 0.157          | 0.437              | 1414              | 166               |
| Left posterior cingulate cortex     | -0.114                                          | 0.013                 | 0.167          | 0.437              | 1431              | 166               |
| Left entorhinal cortex              | -0.112                                          | 0.035                 | 0.217          | 0.437              | 1318              | 137               |
| Left precuneus                      | -0.111                                          | 0.011                 | 0.181          | 0.437              | 1426              | 164               |

|                                         |        |       |       |       |      |     |
|-----------------------------------------|--------|-------|-------|-------|------|-----|
| Right superior frontal gyrus            | -0.110 | 0.013 | 0.189 | 0.437 | 1410 | 161 |
| Left inferior temporal cortex gyrus     | -0.107 | 0.014 | 0.198 | 0.437 | 1383 | 165 |
| Left superior frontal gyrus             | -0.107 | 0.013 | 0.209 | 0.437 | 1413 | 156 |
| Left cuneus                             | -0.106 | 0.012 | 0.209 | 0.437 | 1404 | 160 |
| Right cuneus                            | -0.106 | 0.012 | 0.206 | 0.437 | 1401 | 162 |
| Right pars opercularis                  | -0.104 | 0.013 | 0.218 | 0.437 | 1418 | 161 |
| Left frontal pole                       | -0.103 | 0.027 | 0.218 | 0.437 | 1435 | 164 |
| Right insula                            | -0.101 | 0.015 | 0.229 | 0.437 | 1415 | 163 |
| Right inferior temporal cortex gyrus    | -0.101 | 0.014 | 0.224 | 0.437 | 1400 | 164 |
| Right posterior cingulate cortex        | -0.101 | 0.014 | 0.221 | 0.437 | 1427 | 166 |
| Right banks superior temporal sulcus    | -0.100 | 0.016 | 0.255 | 0.447 | 1321 | 148 |
| Left precentral gyrus                   | -0.100 | 0.011 | 0.231 | 0.437 | 1408 | 163 |
| Right lingual gyrus                     | -0.097 | 0.011 | 0.241 | 0.437 | 1433 | 166 |
| Right transverse temporal cortex        | -0.086 | 0.019 | 0.297 | 0.506 | 1434 | 167 |
| Left isthmus cingulate cortex           | -0.084 | 0.017 | 0.311 | 0.508 | 1431 | 166 |
| Left medial orbitofrontal cortex        | -0.083 | 0.015 | 0.312 | 0.508 | 1430 | 167 |
| Right precentral gyrus                  | -0.079 | 0.012 | 0.355 | 0.565 | 1405 | 157 |
| Left lateral orbitofrontal cortex       | -0.071 | 0.014 | 0.391 | 0.595 | 1433 | 166 |
| Left caudal middle frontal gyrus        | -0.063 | 0.013 | 0.449 | 0.668 | 1429 | 162 |
| Right precuneus                         | -0.059 | 0.011 | 0.476 | 0.680 | 1429 | 165 |
| Right isthmus cingulate cortex          | -0.053 | 0.016 | 0.517 | 0.724 | 1429 | 167 |
| Left rostral anterior cingulate cortex  | -0.044 | 0.021 | 0.595 | 0.783 | 1415 | 164 |
| Right caudal middle frontal gyrus       | -0.043 | 0.013 | 0.604 | 0.783 | 1423 | 163 |
| Right lateral occipital cortex          | -0.043 | 0.012 | 0.603 | 0.783 | 1421 | 163 |
| Left pars orbitalis                     | -0.041 | 0.019 | 0.621 | 0.791 | 1431 | 165 |
| Left caudal anterior cingulate cortex   | -0.039 | 0.024 | 0.636 | 0.795 | 1415 | 165 |
| Right rostral anterior cingulate cortex | -0.031 | 0.021 | 0.715 | 0.818 | 1413 | 160 |
| Left transverse temporal cortex         | -0.027 | 0.018 | 0.741 | 0.823 | 1433 | 165 |
| Left paracentral lobule                 | -0.022 | 0.013 | 0.786 | 0.860 | 1430 | 167 |

|                                        |        |       |       |       |      |     |
|----------------------------------------|--------|-------|-------|-------|------|-----|
| Left supramarginal gyrus               | -0.019 | 0.012 | 0.828 | 0.891 | 1310 | 145 |
| Left superior parietal cortex          | -0.012 | 0.010 | 0.892 | 0.946 | 1417 | 159 |
| Left superior temporal gyrus           | -0.005 | 0.015 | 0.958 | 0.975 | 1296 | 138 |
| Right frontal pole                     | -0.004 | 0.027 | 0.963 | 0.975 | 1434 | 167 |
| Right caudal anterior cingulate cortex | 0.003  | 0.022 | 0.975 | 0.975 | 1422 | 160 |
| Right superior temporal gyrus          | 0.006  | 0.014 | 0.940 | 0.975 | 1316 | 152 |
| Right paracentral lobule               | 0.029  | 0.013 | 0.725 | 0.818 | 1432 | 167 |
| Right entorhinal cortex                | 0.033  | 0.038 | 0.722 | 0.818 | 1244 | 128 |
| Left pericalcarine gyrus               | 0.033  | 0.011 | 0.691 | 0.818 | 1406 | 165 |
| Right temporal pole                    | 0.037  | 0.033 | 0.665 | 0.803 | 1430 | 157 |
| Left temporal pole                     | 0.037  | 0.030 | 0.657 | 0.803 | 1435 | 167 |
| Right superior parietal cortex         | 0.044  | 0.011 | 0.597 | 0.783 | 1411 | 161 |
| Right pericalcarine gyrus              | 0.060  | 0.011 | 0.472 | 0.680 | 1409 | 166 |
| Left postcentral gyrus                 | 0.073  | 0.010 | 0.385 | 0.595 | 1403 | 161 |
| Right supramarginal gyrus              | 0.102  | 0.012 | 0.243 | 0.437 | 1321 | 149 |
| Right postcentral gyrus                | 0.184  | 0.010 | 0.029 | 0.249 | 1414 | 161 |

**TABLE S12b:** Full mega-analytic results for cortical thickness of each structure for the adult OCD patients with no current comorbid depression compared with adult healthy controls, controlling for age, sex and scan center.

|                                     | <b>Cohen's d<sup>a</sup><br/>(NoCurDep vs HC)</b> | <b>Standard Error</b> | <b>P-value</b> | <b>FDR P-value</b> | <b>N controls</b> | <b>N patients</b> |
|-------------------------------------|---------------------------------------------------|-----------------------|----------------|--------------------|-------------------|-------------------|
| Left inferior parietal cortex       | -0.154                                            | 0.005                 | 1.344E-04      | 0.009              | 1364              | 1141              |
| Right inferior parietal cortex      | -0.134                                            | 0.005                 | 0.001          | 0.019              | 1379              | 1154              |
| Left lateral orbitofrontal cortex   | -0.129                                            | 0.007                 | 0.001          | 0.019              | 1433              | 1188              |
| Right medial orbitofrontal cortex   | -0.129                                            | 0.007                 | 0.001          | 0.019              | 1428              | 1183              |
| Left fusiform gyrus                 | -0.126                                            | 0.006                 | 0.001          | 0.019              | 1428              | 1182              |
| Left cortical thickness             | -0.124                                            | 0.004                 | 0.002          | 0.019              | 1435              | 1191              |
| Left precuneus                      | -0.119                                            | 0.005                 | 0.003          | 0.026              | 1426              | 1189              |
| Right middle temporal gyrus         | -0.116                                            | 0.006                 | 0.004          | 0.030              | 1402              | 1167              |
| Right cortical thickness            | -0.113                                            | 0.004                 | 0.004          | 0.030              | 1435              | 1188              |
| Right lateral orbitofrontal cortex  | -0.113                                            | 0.007                 | 0.004          | 0.030              | 1431              | 1190              |
| Right rostral middle frontal gyrus  | -0.109                                            | 0.005                 | 0.006          | 0.032              | 1424              | 1186              |
| Right parahippocampal gyrus         | -0.109                                            | 0.010                 | 0.006          | 0.032              | 1420              | 1182              |
| Right precuneus                     | -0.109                                            | 0.005                 | 0.006          | 0.032              | 1429              | 1186              |
| Right fusiform gyrus                | -0.106                                            | 0.006                 | 0.008          | 0.036              | 1428              | 1164              |
| Left caudal middle frontal gyrus    | -0.105                                            | 0.006                 | 0.008          | 0.036              | 1429              | 1177              |
| Left rostral middle frontal gyrus   | -0.103                                            | 0.006                 | 0.009          | 0.040              | 1429              | 1179              |
| Left middle temporal gyrus          | -0.102                                            | 0.007                 | 0.013          | 0.053              | 1320              | 1089              |
| Left pars opercularis               | -0.098                                            | 0.006                 | 0.014          | 0.053              | 1427              | 1185              |
| Left medial orbitofrontal cortex    | -0.095                                            | 0.007                 | 0.016          | 0.059              | 1430              | 1183              |
| Right isthmus cingulate cortex      | -0.094                                            | 0.008                 | 0.018          | 0.059              | 1429              | 1189              |
| Left inferior temporal cortex gyrus | -0.094                                            | 0.007                 | 0.019          | 0.059              | 1383              | 1165              |
| Right caudal middle frontal gyrus   | -0.093                                            | 0.006                 | 0.018          | 0.059              | 1423              | 1183              |
| Left entorhinal cortex              | -0.091                                            | 0.015                 | 0.027          | 0.075              | 1318              | 1108              |
| Left superior frontal gyrus         | -0.089                                            | 0.006                 | 0.027          | 0.075              | 1413              | 1142              |
| Right lateral occipital cortex      | -0.089                                            | 0.005                 | 0.025          | 0.075              | 1421              | 1176              |

|                                        |        |       |       |       |      |      |
|----------------------------------------|--------|-------|-------|-------|------|------|
| Left pars orbitalis                    | -0.087 | 0.009 | 0.028 | 0.076 | 1431 | 1184 |
| Left posterior cingulate cortex        | -0.086 | 0.006 | 0.030 | 0.078 | 1431 | 1186 |
| Left superior parietal cortex          | -0.083 | 0.005 | 0.037 | 0.091 | 1417 | 1171 |
| Left insula                            | -0.080 | 0.007 | 0.045 | 0.106 | 1414 | 1167 |
| Left rostral anterior cingulate cortex | -0.080 | 0.010 | 0.045 | 0.106 | 1415 | 1170 |
| Left lateral occipital cortex          | -0.079 | 0.006 | 0.048 | 0.108 | 1419 | 1174 |
| Left parahippocampal gyrus             | -0.077 | 0.012 | 0.051 | 0.111 | 1424 | 1182 |
| Right insula                           | -0.075 | 0.007 | 0.061 | 0.123 | 1415 | 1160 |
| Right posterior cingulate cortex       | -0.074 | 0.007 | 0.061 | 0.123 | 1427 | 1188 |
| Right pars opercularis                 | -0.074 | 0.006 | 0.061 | 0.123 | 1418 | 1178 |
| Right pars triangularis                | -0.072 | 0.006 | 0.070 | 0.135 | 1423 | 1166 |
| Left isthmus cingulate cortex          | -0.071 | 0.008 | 0.073 | 0.138 | 1431 | 1186 |
| Right superior parietal cortex         | -0.069 | 0.005 | 0.083 | 0.154 | 1411 | 1168 |
| Right pars orbitalis                   | -0.066 | 0.009 | 0.096 | 0.168 | 1431 | 1189 |
| Left frontal pole                      | -0.066 | 0.013 | 0.095 | 0.168 | 1435 | 1186 |
| Left supramarginal gyrus               | -0.065 | 0.006 | 0.117 | 0.195 | 1310 | 1092 |
| Right caudal anterior cingulate cortex | -0.064 | 0.010 | 0.109 | 0.186 | 1422 | 1184 |
| Right inferior temporal cortex gyrus   | -0.060 | 0.007 | 0.128 | 0.209 | 1400 | 1184 |
| Left banks superior temporal sulcus    | -0.053 | 0.007 | 0.205 | 0.327 | 1284 | 1079 |
| Right superior frontal gyrus           | -0.048 | 0.006 | 0.222 | 0.345 | 1410 | 1178 |
| Left cuneus                            | -0.046 | 0.006 | 0.247 | 0.375 | 1404 | 1166 |
| Right precentral gyrus                 | -0.045 | 0.006 | 0.264 | 0.393 | 1405 | 1159 |
| Left pars triangularis                 | -0.042 | 0.006 | 0.292 | 0.417 | 1434 | 1185 |
| Right lingual gyrus                    | -0.042 | 0.005 | 0.282 | 0.411 | 1433 | 1186 |
| Left lingual gyrus                     | -0.036 | 0.005 | 0.364 | 0.509 | 1427 | 1183 |
| Right entorhinal cortex                | -0.035 | 0.017 | 0.404 | 0.548 | 1244 | 1076 |
| Right supramarginal gyrus              | -0.034 | 0.006 | 0.407 | 0.548 | 1321 | 1103 |
| Left paracentral lobule                | -0.029 | 0.006 | 0.457 | 0.604 | 1430 | 1183 |
| Left postcentral gyrus                 | -0.028 | 0.005 | 0.475 | 0.616 | 1403 | 1166 |



|                                         |        |       |       |       |      |      |
|-----------------------------------------|--------|-------|-------|-------|------|------|
| Right cuneus                            | -0.027 | 0.006 | 0.494 | 0.628 | 1401 | 1163 |
| Left superior temporal gyrus            | -0.023 | 0.007 | 0.578 | 0.710 | 1296 | 1069 |
| Left precentral gyrus                   | -0.021 | 0.005 | 0.605 | 0.730 | 1408 | 1171 |
| Right rostral anterior cingulate cortex | -0.013 | 0.010 | 0.753 | 0.855 | 1413 | 1176 |
| Right transverse temporal cortex        | -0.013 | 0.009 | 0.751 | 0.855 | 1434 | 1189 |
| Left transverse temporal cortex         | -0.012 | 0.009 | 0.770 | 0.855 | 1433 | 1188 |
| Right paracentral lobule                | -0.008 | 0.006 | 0.835 | 0.872 | 1432 | 1186 |
| Right temporal pole                     | -0.006 | 0.015 | 0.886 | 0.899 | 1430 | 1166 |
| Left caudal anterior cingulate cortex   | -0.006 | 0.012 | 0.881 | 0.899 | 1415 | 1169 |
| Right superior temporal gyrus           | -0.001 | 0.007 | 0.979 | 0.979 | 1316 | 1096 |
| Right pericalcarine gyrus               | 0.009  | 0.005 | 0.821 | 0.872 | 1409 | 1171 |
| Right banks superior temporal sulcus    | 0.009  | 0.007 | 0.828 | 0.872 | 1321 | 1104 |
| Left pericalcarine gyrus                | 0.010  | 0.005 | 0.793 | 0.867 | 1406 | 1177 |
| Left temporal pole                      | 0.012  | 0.015 | 0.765 | 0.855 | 1435 | 1186 |
| Right frontal pole                      | 0.017  | 0.013 | 0.661 | 0.784 | 1434 | 1188 |
| Right postcentral gyrus                 | 0.025  | 0.005 | 0.528 | 0.660 | 1414 | 1172 |

**TABLE S12c:** Full mega-analytic results for cortical thickness of each structure for the adult OCD patients with current comorbid depression compared with adult patients without, controlling for age, sex and scan center.

|                                      | <b>Cohen's d<sup>a</sup><br/>(NoCurDep vs CurDep)</b> | <b>Standard Error</b> | <b>P-value</b> | <b>FDR P-value</b> | <b>N patients with<br/>current depression</b> | <b>N patients with no<br/>current depression</b> |
|--------------------------------------|-------------------------------------------------------|-----------------------|----------------|--------------------|-----------------------------------------------|--------------------------------------------------|
| Right cuneus                         | -0.170                                                | 0.012                 | 0.045          | 0.979              | 162                                           | 1163                                             |
| Left lingual gyrus                   | -0.166                                                | 0.011                 | 0.047          | 0.979              | 167                                           | 1183                                             |
| Right transverse temporal cortex     | -0.149                                                | 0.018                 | 0.074          | 0.979              | 167                                           | 1189                                             |
| Left rostral middle frontal gyrus    | -0.146                                                | 0.012                 | 0.081          | 0.979              | 166                                           | 1179                                             |
| Right inferior parietal cortex       | -0.143                                                | 0.012                 | 0.093          | 0.979              | 160                                           | 1154                                             |
| Right pars orbitalis                 | -0.142                                                | 0.019                 | 0.090          | 0.979              | 166                                           | 1189                                             |
| Right banks superior temporal sulcus | -0.135                                                | 0.016                 | 0.129          | 0.979              | 148                                           | 1104                                             |
| Left precentral gyrus                | -0.131                                                | 0.012                 | 0.122          | 0.979              | 163                                           | 1171                                             |
| Left cuneus                          | -0.126                                                | 0.012                 | 0.139          | 0.979              | 160                                           | 1166                                             |
| Left insula                          | -0.114                                                | 0.015                 | 0.175          | 0.979              | 166                                           | 1167                                             |
| Left lateral occipital cortex        | -0.100                                                | 0.012                 | 0.232          | 0.979              | 166                                           | 1174                                             |
| Right lingual gyrus                  | -0.099                                                | 0.011                 | 0.237          | 0.979              | 166                                           | 1186                                             |
| Left parahippocampal gyrus           | -0.091                                                | 0.027                 | 0.275          | 0.979              | 167                                           | 1182                                             |
| Left middle temporal gyrus           | -0.082                                                | 0.015                 | 0.359          | 0.979              | 145                                           | 1089                                             |
| Left cortical thickness              | -0.081                                                | 0.009                 | 0.335          | 0.979              | 167                                           | 1191                                             |
| Right insula                         | -0.081                                                | 0.016                 | 0.336          | 0.979              | 163                                           | 1160                                             |
| Right superior frontal gyrus         | -0.080                                                | 0.013                 | 0.344          | 0.979              | 161                                           | 1178                                             |
| Left pars triangularis               | -0.078                                                | 0.014                 | 0.349          | 0.979              | 166                                           | 1185                                             |
| Left posterior cingulate cortex      | -0.076                                                | 0.014                 | 0.363          | 0.979              | 166                                           | 1186                                             |
| Right medial orbitofrontal cortex    | -0.073                                                | 0.016                 | 0.385          | 0.979              | 164                                           | 1183                                             |
| Left transverse temporal cortex      | -0.072                                                | 0.019                 | 0.390          | 0.979              | 165                                           | 1188                                             |
| Left superior frontal gyrus          | -0.070                                                | 0.013                 | 0.417          | 0.979              | 156                                           | 1142                                             |
| Left pericalcarine gyrus             | -0.061                                                | 0.012                 | 0.468          | 0.979              | 165                                           | 1177                                             |
| Left paracentral lobule              | -0.058                                                | 0.014                 | 0.491          | 0.979              | 167                                           | 1183                                             |
| Right pars triangularis              | -0.052                                                | 0.014                 | 0.542          | 0.979              | 157                                           | 1166                                             |

|                                         |        |       |       |       |     |      |
|-----------------------------------------|--------|-------|-------|-------|-----|------|
| Right precentral gyrus                  | -0.051 | 0.012 | 0.555 | 0.979 | 157 | 1159 |
| Right posterior cingulate cortex        | -0.051 | 0.015 | 0.542 | 0.979 | 166 | 1188 |
| Right superior temporal gyrus           | -0.050 | 0.014 | 0.571 | 0.979 | 152 | 1096 |
| Left banks superior temporal sulcus     | -0.049 | 0.016 | 0.584 | 0.979 | 148 | 1079 |
| Right frontal pole                      | -0.049 | 0.026 | 0.557 | 0.979 | 167 | 1188 |
| Right lateral orbitofrontal cortex      | -0.049 | 0.015 | 0.554 | 0.979 | 167 | 1190 |
| Left precuneus                          | -0.048 | 0.012 | 0.566 | 0.979 | 164 | 1189 |
| Left pars opercularis                   | -0.043 | 0.013 | 0.610 | 0.979 | 165 | 1185 |
| Right cortical thickness                | -0.041 | 0.009 | 0.625 | 0.979 | 165 | 1188 |
| Left caudal anterior cingulate cortex   | -0.038 | 0.025 | 0.651 | 0.979 | 165 | 1169 |
| Right lateral occipital cortex          | -0.032 | 0.012 | 0.707 | 0.979 | 163 | 1176 |
| Right rostral middle frontal gyrus      | -0.029 | 0.011 | 0.731 | 0.979 | 167 | 1186 |
| Left superior parietal cortex           | -0.029 | 0.010 | 0.735 | 0.979 | 159 | 1171 |
| Left medial orbitofrontal cortex        | -0.027 | 0.015 | 0.748 | 0.979 | 167 | 1183 |
| Right rostral anterior cingulate cortex | -0.027 | 0.022 | 0.747 | 0.979 | 160 | 1176 |
| Left supramarginal gyrus                | -0.025 | 0.013 | 0.784 | 0.979 | 145 | 1092 |
| Left caudal middle frontal gyrus        | -0.025 | 0.013 | 0.772 | 0.979 | 162 | 1177 |
| Left inferior parietal cortex           | -0.024 | 0.012 | 0.774 | 0.979 | 162 | 1141 |
| Left fusiform gyrus                     | -0.019 | 0.013 | 0.824 | 0.979 | 167 | 1182 |
| Left frontal pole                       | -0.019 | 0.026 | 0.824 | 0.979 | 164 | 1186 |
| Right pars opercularis                  | -0.018 | 0.014 | 0.829 | 0.979 | 161 | 1178 |
| Right pericalcarine gyrus               | -0.015 | 0.012 | 0.862 | 0.979 | 166 | 1171 |
| Right precuneus                         | -0.014 | 0.012 | 0.871 | 0.979 | 165 | 1186 |
| Right middle temporal gyrus             | -0.014 | 0.014 | 0.865 | 0.979 | 161 | 1167 |
| Left isthmus cingulate cortex           | -0.011 | 0.018 | 0.900 | 0.979 | 166 | 1186 |
| Right inferior temporal cortex gyrus    | -0.009 | 0.014 | 0.916 | 0.979 | 164 | 1184 |
| Right parahippocampal gyrus             | -0.008 | 0.022 | 0.923 | 0.979 | 166 | 1182 |
| Left entorhinal cortex                  | -0.006 | 0.035 | 0.948 | 0.990 | 137 | 1108 |
| Left rostral anterior cingulate cortex  | -0.002 | 0.022 | 0.981 | 1.000 | 164 | 1170 |

|                                               |        |       |       |       |     |      |
|-----------------------------------------------|--------|-------|-------|-------|-----|------|
| <b>Left pars orbitalis</b>                    | 0.001  | 0.019 | 0.994 | 1.000 | 165 | 1184 |
| <b>Left superior temporal gyrus</b>           | <0.001 | 0.015 | 1.000 | 1.000 | 138 | 1069 |
| <b>Right paracentral lobule</b>               | 0.011  | 0.013 | 0.898 | 0.979 | 167 | 1186 |
| <b>Right fusiform gyrus</b>                   | 0.013  | 0.013 | 0.882 | 0.979 | 156 | 1164 |
| <b>Left inferior temporal cortex gyrus</b>    | 0.018  | 0.014 | 0.829 | 0.979 | 165 | 1165 |
| <b>Right caudal anterior cingulate cortex</b> | 0.022  | 0.022 | 0.798 | 0.979 | 160 | 1184 |
| <b>Right isthmus cingulate cortex</b>         | 0.032  | 0.017 | 0.698 | 0.979 | 167 | 1189 |
| <b>Right superior parietal cortex</b>         | 0.032  | 0.011 | 0.705 | 0.979 | 161 | 1168 |
| <b>Left lateral orbitofrontal cortex</b>      | 0.034  | 0.015 | 0.685 | 0.979 | 166 | 1188 |
| <b>Right caudal middle frontal gyrus</b>      | 0.042  | 0.014 | 0.622 | 0.979 | 163 | 1183 |
| <b>Right entorhinal cortex</b>                | 0.054  | 0.038 | 0.567 | 0.979 | 128 | 1076 |
| <b>Left postcentral gyrus</b>                 | 0.055  | 0.010 | 0.514 | 0.979 | 161 | 1166 |
| <b>Right supramarginal gyrus</b>              | 0.060  | 0.013 | 0.498 | 0.979 | 149 | 1103 |
| <b>Right temporal pole</b>                    | 0.065  | 0.034 | 0.446 | 0.979 | 157 | 1166 |
| <b>Left temporal pole</b>                     | 0.069  | 0.031 | 0.410 | 0.979 | 167 | 1186 |
| <b>Right postcentral gyrus</b>                | 0.073  | 0.010 | 0.393 | 0.979 | 161 | 1172 |

**TABLE S13a:** Full mega-analytic results for surface area of each structure for the adult OCD patients with current depression compared with adult healthy controls, controlling for age, sex, scan center and ICV.

|                                                | <b>Cohen's d<sup>a</sup><br/>(CurDep vs HC)</b> | <b>Standard Error</b> | <b>P-value</b> | <b>FDR P-value</b> | <b>N controls</b> | <b>N patients</b> |
|------------------------------------------------|-------------------------------------------------|-----------------------|----------------|--------------------|-------------------|-------------------|
| <b>Left caudal middle frontal gyrus</b>        | -0.214                                          | 27.552                | 0.011          | 0.663              | 1427              | 161               |
| <b>Right rostral anterior cingulate cortex</b> | -0.178                                          | 10.189                | 0.035          | 0.663              | 1411              | 160               |
| <b>Left transverse temporal cortex</b>         | -0.172                                          | 6.128                 | 0.039          | 0.663              | 1431              | 164               |
| <b>Right superior temporal gyrus</b>           | -0.148                                          | 26.226                | 0.088          | 0.818              | 1314              | 151               |
| <b>Left paracentral lobule</b>                 | -0.134                                          | 13.759                | 0.106          | 0.818              | 1428              | 166               |
| <b>Left lateral occipital cortex</b>           | -0.131                                          | 40.073                | 0.116          | 0.818              | 1417              | 165               |
| <b>Right isthmus cingulate cortex</b>          | -0.127                                          | 10.929                | 0.125          | 0.818              | 1427              | 166               |
| <b>Right postcentral gyrus</b>                 | -0.117                                          | 32.838                | 0.166          | 0.818              | 1412              | 160               |
| <b>Left surface area</b>                       | -0.117                                          | 390.679               | 0.157          | 1.000              | 1433              | 166               |
| <b>Left lingual gyrus</b>                      | -0.113                                          | 30.305                | 0.174          | 0.818              | 1425              | 166               |
| <b>Left superior frontal gyrus</b>             | -0.102                                          | 49.623                | 0.233          | 0.818              | 1411              | 155               |
| <b>Right pericalcarine gyrus</b>               | -0.099                                          | 18.445                | 0.235          | 0.818              | 1407              | 165               |
| <b>Right lateral occipital cortex</b>          | -0.098                                          | 41.163                | 0.243          | 0.818              | 1419              | 162               |
| <b>Left cuneus</b>                             | -0.096                                          | 15.555                | 0.259          | 0.818              | 1402              | 159               |
| <b>Right transverse temporal cortex</b>        | -0.095                                          | 4.491                 | 0.251          | 0.818              | 1432              | 166               |
| <b>Right superior frontal gyrus</b>            | -0.092                                          | 50.177                | 0.276          | 0.818              | 1408              | 160               |
| <b>Left precentral gyrus</b>                   | -0.090                                          | 34.005                | 0.282          | 0.818              | 1406              | 162               |
| <b>Left postcentral gyrus</b>                  | -0.087                                          | 33.648                | 0.304          | 0.818              | 1401              | 160               |
| <b>Right precentral gyrus</b>                  | -0.085                                          | 38.178                | 0.320          | 0.818              | 1403              | 156               |
| <b>Right cuneus</b>                            | -0.081                                          | 15.175                | 0.338          | 0.818              | 1399              | 161               |
| <b>Left pars opercularis</b>                   | -0.081                                          | 21.189                | 0.329          | 0.818              | 1425              | 164               |
| <b>Left superior temporal gyrus</b>            | -0.080                                          | 31.827                | 0.381          | 0.818              | 1294              | 137               |
| <b>Right supramarginal gyrus</b>               | -0.076                                          | 37.363                | 0.383          | 0.818              | 1319              | 148               |
| <b>Right pars opercularis</b>                  | -0.074                                          | 17.792                | 0.376          | 0.818              | 1416              | 161               |
| <b>Right caudal middle frontal gyrus</b>       | -0.070                                          | 27.741                | 0.401          | 0.818              | 1421              | 162               |

|                                        |        |         |       |       |      |     |
|----------------------------------------|--------|---------|-------|-------|------|-----|
| Right caudal anterior cingulate cortex | -0.066 | 12.682  | 0.433 | 0.818 | 1420 | 159 |
| Left supramarginal gyrus               | -0.065 | 40.600  | 0.466 | 0.818 | 1308 | 144 |
| Left superior parietal cortex          | -0.063 | 45.242  | 0.458 | 0.818 | 1415 | 158 |
| Right superior parietal cortex         | -0.060 | 44.262  | 0.474 | 0.818 | 1409 | 160 |
| Left pars triangularis                 | -0.059 | 14.823  | 0.479 | 0.818 | 1432 | 165 |
| Left posterior cingulate cortex        | -0.052 | 12.967  | 0.532 | 0.818 | 1429 | 165 |
| Right surface area                     | -0.051 | 397.176 | 0.543 | 1.000 | 1434 | 165 |
| Left insula                            | -0.051 | 16.633  | 0.536 | 0.818 | 1412 | 165 |
| Left pericalcarine gyrus               | -0.049 | 17.249  | 0.554 | 0.818 | 1404 | 164 |
| Right pars orbitalis                   | -0.044 | 7.532   | 0.593 | 0.833 | 1429 | 165 |
| Left lateral orbitofrontal cortex      | -0.042 | 19.582  | 0.615 | 0.833 | 1431 | 165 |
| Left rostral anterior cingulate cortex | -0.042 | 11.243  | 0.616 | 0.833 | 1413 | 163 |
| Left frontal pole                      | -0.036 | 2.833   | 0.663 | 0.867 | 1433 | 163 |
| Right precuneus                        | -0.027 | 32.838  | 0.744 | 0.940 | 1427 | 164 |
| Left inferior temporal cortex gyrus    | -0.026 | 32.919  | 0.754 | 0.940 | 1382 | 164 |
| Right posterior cingulate cortex       | -0.024 | 13.569  | 0.774 | 0.940 | 1425 | 165 |
| Left parahippocampal gyrus             | -0.024 | 7.971   | 0.772 | 0.940 | 1422 | 166 |
| Left fusiform gyrus                    | -0.018 | 29.120  | 0.832 | 0.973 | 1426 | 166 |
| Left isthmus cingulate cortex          | -0.018 | 12.430  | 0.829 | 0.973 | 1429 | 165 |
| Left precuneus                         | -0.011 | 29.614  | 0.897 | 0.973 | 1424 | 163 |
| Right lingual gyrus                    | -0.009 | 27.967  | 0.916 | 0.973 | 1431 | 165 |
| Left pars orbitalis                    | -0.005 | 6.106   | 0.948 | 0.973 | 1429 | 164 |
| Right insula                           | -0.004 | 18.517  | 0.959 | 0.973 | 1413 | 162 |
| Right parahippocampal gyrus            | -0.001 | 7.844   | 0.993 | 0.993 | 1418 | 165 |
| Right frontal pole                     | 0.005  | 3.507   | 0.956 | 0.973 | 1432 | 166 |
| Left banks superior temporal sulcus    | 0.008  | 13.000  | 0.923 | 0.973 | 1282 | 147 |
| Left inferior parietal cortex          | 0.013  | 43.778  | 0.877 | 0.973 | 1363 | 161 |
| Left medial orbitofrontal cortex       | 0.013  | 17.323  | 0.877 | 0.973 | 1428 | 166 |
| Left entorhinal cortex                 | 0.018  | 6.778   | 0.845 | 0.973 | 1316 | 137 |

|                                       |       |        |       |       |      |     |
|---------------------------------------|-------|--------|-------|-------|------|-----|
| Right paracentral lobule              | 0.041 | 15.675 | 0.625 | 0.833 | 1430 | 166 |
| Left rostral middle frontal gyrus     | 0.046 | 48.046 | 0.580 | 0.833 | 1427 | 165 |
| Right inferior temporal cortex gyrus  | 0.050 | 30.944 | 0.548 | 0.818 | 1399 | 163 |
| Right rostral middle frontal gyrus    | 0.051 | 49.210 | 0.542 | 0.818 | 1422 | 166 |
| Right inferior parietal cortex        | 0.059 | 50.288 | 0.483 | 0.818 | 1377 | 159 |
| Right banks superior temporal sulcus  | 0.059 | 11.249 | 0.503 | 0.818 | 1319 | 147 |
| Left temporal pole                    | 0.061 | 4.921  | 0.460 | 0.818 | 1434 | 166 |
| Right temporal pole                   | 0.062 | 5.233  | 0.463 | 0.818 | 1428 | 156 |
| Right entorhinal cortex               | 0.064 | 13.165 | 0.498 | 0.818 | 1242 | 127 |
| Right middle temporal gyrus           | 0.066 | 27.648 | 0.435 | 0.818 | 1401 | 161 |
| Left middle temporal gyrus            | 0.077 | 28.253 | 0.387 | 0.818 | 1319 | 144 |
| Right lateral orbitofrontal cortex    | 0.078 | 21.382 | 0.349 | 0.818 | 1429 | 166 |
| Right fusiform gyrus                  | 0.079 | 29.303 | 0.356 | 0.818 | 1426 | 155 |
| Left caudal anterior cingulate cortex | 0.115 | 10.262 | 0.169 | 0.818 | 1413 | 164 |
| Right medial orbitofrontal cortex     | 0.133 | 14.119 | 0.109 | 0.818 | 1426 | 164 |
| Right pars triangularis               | 0.189 | 18.870 | 0.027 | 0.663 | 1421 | 156 |

**TABLE S13b:** Full mega-analytic results for surface area of each structure for the adult OCD patients with no current comorbid depression compared with adult healthy controls, controlling for age, sex, scan center and ICV.

|                                                | <b>Cohen's d<sup>a</sup><br/>(NoCurDep vs HC)</b> | <b>Standard Error</b> | <b>P-value</b> | <b>FDR P-value</b> | <b>N controls</b> | <b>N patients</b> |
|------------------------------------------------|---------------------------------------------------|-----------------------|----------------|--------------------|-------------------|-------------------|
| <b>Left transverse temporal cortex</b>         | -0.153                                            | 2.859                 | 1.072E-04      | 0.007              | 1431              | 1188              |
| <b>Right superior temporal gyrus</b>           | -0.106                                            | 12.292                | 0.010          | 0.223              | 1314              | 1096              |
| <b>Right transverse temporal cortex</b>        | -0.102                                            | 2.116                 | 0.010          | 0.223              | 1432              | 1189              |
| <b>Left pars triangularis</b>                  | -0.084                                            | 7.015                 | 0.033          | 0.561              | 1432              | 1185              |
| <b>Right supramarginal gyrus</b>               | -0.072                                            | 17.472                | 0.079          | 0.700              | 1319              | 1103              |
| <b>Left superior frontal gyrus</b>             | -0.069                                            | 22.822                | 0.086          | 0.700              | 1411              | 1142              |
| <b>Left pars opercularis</b>                   | -0.069                                            | 9.879                 | 0.080          | 0.700              | 1425              | 1185              |
| <b>Right posterior cingulate cortex</b>        | -0.066                                            | 6.293                 | 0.093          | 0.700              | 1425              | 1188              |
| <b>Left postcentral gyrus</b>                  | -0.062                                            | 15.735                | 0.121          | 0.824              | 1401              | 1166              |
| <b>Left superior temporal gyrus</b>            | -0.058                                            | 14.343                | 0.166          | 0.853              | 1294              | 1069              |
| <b>Left lateral orbitofrontal cortex</b>       | -0.056                                            | 9.218                 | 0.156          | 0.853              | 1431              | 1188              |
| <b>Right superior frontal gyrus</b>            | -0.053                                            | 23.232                | 0.180          | 0.853              | 1408              | 1178              |
| <b>Right caudal anterior cingulate cortex</b>  | -0.052                                            | 5.627                 | 0.188          | 0.853              | 1420              | 1184              |
| <b>Right rostral anterior cingulate cortex</b> | -0.050                                            | 4.819                 | 0.209          | 0.890              | 1411              | 1176              |
| <b>Left surface area</b>                       | -0.050                                            | 181.603               | 0.203          | 1.000              | 1433              | 1191              |
| <b>Left supramarginal gyrus</b>                | -0.047                                            | 18.553                | 0.259          | 0.899              | 1308              | 1092              |
| <b>Right middle temporal gyrus</b>             | -0.046                                            | 12.838                | 0.252          | 0.899              | 1401              | 1167              |
| <b>Left insula</b>                             | -0.043                                            | 7.820                 | 0.278          | 0.899              | 1412              | 1167              |
| <b>Left superior parietal cortex</b>           | -0.042                                            | 20.969                | 0.287          | 0.899              | 1415              | 1171              |
| <b>Right pars triangularis</b>                 | -0.039                                            | 8.767                 | 0.331          | 0.899              | 1421              | 1166              |
| <b>Left cuneus</b>                             | -0.039                                            | 7.251                 | 0.329          | 0.899              | 1402              | 1166              |
| <b>Left frontal pole</b>                       | -0.038                                            | 1.322                 | 0.330          | 0.899              | 1433              | 1186              |
| <b>Right pars opercularis</b>                  | -0.036                                            | 8.337                 | 0.359          | 0.911              | 1416              | 1178              |
| <b>Left lateral occipital cortex</b>           | -0.034                                            | 18.748                | 0.390          | 0.911              | 1417              | 1174              |
| <b>Left pars orbitalis</b>                     | -0.034                                            | 2.876                 | 0.386          | 0.911              | 1429              | 1184              |



|                                        |        |         |       |       |      |      |
|----------------------------------------|--------|---------|-------|-------|------|------|
| Right surface area                     | -0.033 | 183.447 | 0.399 | 1.000 | 1434 | 1190 |
| Right pericalcarine gyrus              | -0.032 | 8.754   | 0.415 | 0.911 | 1407 | 1171 |
| Left inferior temporal cortex gyrus    | -0.031 | 15.507  | 0.441 | 0.919 | 1382 | 1165 |
| Left posterior cingulate cortex        | -0.027 | 6.035   | 0.497 | 0.942 | 1429 | 1186 |
| Right precuneus                        | -0.026 | 15.416  | 0.511 | 0.942 | 1427 | 1186 |
| Right insula                           | -0.025 | 8.665   | 0.526 | 0.942 | 1413 | 1160 |
| Left pericalcarine gyrus               | -0.022 | 8.153   | 0.589 | 0.955 | 1404 | 1177 |
| Right superior parietal cortex         | -0.022 | 20.627  | 0.577 | 0.955 | 1409 | 1168 |
| Left isthmus cingulate cortex          | -0.021 | 5.973   | 0.591 | 0.955 | 1429 | 1186 |
| Left entorhinal cortex                 | -0.019 | 3.034   | 0.649 | 0.955 | 1316 | 1108 |
| Right isthmus cingulate cortex         | -0.018 | 5.372   | 0.649 | 0.955 | 1427 | 1189 |
| Right lateral occipital cortex         | -0.018 | 19.319  | 0.649 | 0.955 | 1419 | 1176 |
| Left lingual gyrus                     | -0.014 | 14.451  | 0.732 | 0.955 | 1425 | 1183 |
| Left caudal middle frontal gyrus       | -0.014 | 12.818  | 0.727 | 0.955 | 1427 | 1177 |
| Right entorhinal cortex                | -0.014 | 5.018   | 0.732 | 0.955 | 1242 | 1076 |
| Right cuneus                           | -0.014 | 7.151   | 0.718 | 0.955 | 1399 | 1163 |
| Left temporal pole                     | -0.013 | 2.327   | 0.744 | 0.955 | 1434 | 1186 |
| Left medial orbitofrontal cortex       | -0.012 | 8.111   | 0.765 | 0.958 | 1428 | 1183 |
| Left rostral middle frontal gyrus      | -0.011 | 22.050  | 0.789 | 0.958 | 1427 | 1179 |
| Right fusiform gyrus                   | -0.006 | 13.425  | 0.887 | 0.958 | 1426 | 1164 |
| Right lateral orbitofrontal cortex     | -0.006 | 9.972   | 0.876 | 0.958 | 1429 | 1190 |
| Left middle temporal gyrus             | -0.006 | 12.980  | 0.880 | 0.958 | 1319 | 1089 |
| Right lingual gyrus                    | -0.002 | 13.710  | 0.953 | 0.978 | 1431 | 1186 |
| Left rostral anterior cingulate cortex | <0.001 | 5.242   | 0.996 | 0.996 | 1413 | 1170 |
| Right precentral gyrus                 | 0.002  | 17.675  | 0.963 | 0.978 | 1403 | 1159 |
| Right postcentral gyrus                | 0.003  | 15.200  | 0.942 | 0.978 | 1412 | 1172 |
| Right inferior temporal cortex gyrus   | 0.005  | 14.837  | 0.903 | 0.959 | 1399 | 1184 |
| Right temporal pole                    | 0.006  | 2.379   | 0.885 | 0.958 | 1428 | 1166 |
| Right caudal middle frontal gyrus      | 0.006  | 13.091  | 0.887 | 0.958 | 1421 | 1183 |

|                                              |       |        |       |       |      |      |
|----------------------------------------------|-------|--------|-------|-------|------|------|
| <b>Left caudal anterior cingulate cortex</b> | 0.007 | 4.928  | 0.854 | 0.958 | 1413 | 1169 |
| <b>Left paracentral lobule</b>               | 0.007 | 6.424  | 0.867 | 0.958 | 1428 | 1183 |
| <b>Right rostral middle frontal gyrus</b>    | 0.008 | 22.713 | 0.838 | 0.958 | 1422 | 1186 |
| <b>Right medial orbitofrontal cortex</b>     | 0.013 | 6.701  | 0.742 | 0.955 | 1426 | 1183 |
| <b>Right pars orbitalis</b>                  | 0.014 | 3.570  | 0.732 | 0.955 | 1429 | 1189 |
| <b>Right frontal pole</b>                    | 0.016 | 1.669  | 0.688 | 0.955 | 1432 | 1188 |
| <b>Left precentral gyrus</b>                 | 0.019 | 16.022 | 0.636 | 0.955 | 1406 | 1171 |
| <b>Right banks superior temporal sulcus</b>  | 0.026 | 5.108  | 0.526 | 0.942 | 1319 | 1104 |
| <b>Left inferior parietal cortex</b>         | 0.029 | 20.759 | 0.466 | 0.932 | 1363 | 1141 |
| <b>Right parahippocampal gyrus</b>           | 0.030 | 3.670  | 0.446 | 0.919 | 1418 | 1182 |
| <b>Left banks superior temporal sulcus</b>   | 0.034 | 6.205  | 0.409 | 0.911 | 1282 | 1079 |
| <b>Right paracentral lobule</b>              | 0.036 | 7.530  | 0.362 | 0.911 | 1430 | 1186 |
| <b>Left precuneus</b>                        | 0.040 | 14.064 | 0.313 | 0.899 | 1424 | 1189 |
| <b>Left fusiform gyrus</b>                   | 0.043 | 13.905 | 0.273 | 0.899 | 1426 | 1182 |
| <b>Right inferior parietal cortex</b>        | 0.053 | 23.328 | 0.184 | 0.853 | 1377 | 1154 |
| <b>Left parahippocampal gyrus</b>            | 0.069 | 3.851  | 0.080 | 0.700 | 1422 | 1182 |

**TABLE S13c:** Full mega-analytic results for surface area of each structure for the adult OCD patients with current comorbid depression compared with adult patients without, controlling for age, sex, scan center and ICV.

|                                                | <b>Cohen's d<sup>a</sup><br/>(NoCurDep vs CurDep)</b> | <b>Standard Error</b> | <b>P-value</b> | <b>FDR P-value</b> | <b>N patients with<br/>current depression</b> | <b>N patients with no<br/>current depression</b> |
|------------------------------------------------|-------------------------------------------------------|-----------------------|----------------|--------------------|-----------------------------------------------|--------------------------------------------------|
| <b>Right rostral anterior cingulate cortex</b> | -0.157                                                | 10.363                | 0.065          | 0.746              | 160                                           | 1176                                             |
| <b>Left paracentral lobule</b>                 | -0.148                                                | 13.393                | 0.078          | 0.748              | 166                                           | 1183                                             |
| <b>Left caudal middle frontal gyrus</b>        | -0.115                                                | 27.931                | 0.177          | 0.989              | 161                                           | 1177                                             |
| <b>Right isthmus cingulate cortex</b>          | -0.112                                                | 11.827                | 0.181          | 0.989              | 166                                           | 1189                                             |
| <b>Right precentral gyrus</b>                  | -0.088                                                | 38.801                | 0.309          | 0.989              | 156                                           | 1159                                             |
| <b>Left precentral gyrus</b>                   | -0.080                                                | 35.226                | 0.345          | 0.989              | 162                                           | 1171                                             |
| <b>Left lateral occipital cortex</b>           | -0.068                                                | 39.166                | 0.420          | 0.989              | 165                                           | 1174                                             |
| <b>Right caudal middle frontal gyrus</b>       | -0.061                                                | 28.037                | 0.470          | 0.989              | 162                                           | 1183                                             |
| <b>Right pars orbitalis</b>                    | -0.050                                                | 7.613                 | 0.555          | 0.989              | 165                                           | 1189                                             |
| <b>Left isthmus cingulate cortex</b>           | -0.046                                                | 12.893                | 0.582          | 0.989              | 165                                           | 1186                                             |
| <b>Left parahippocampal gyrus</b>              | -0.043                                                | 8.345                 | 0.610          | 0.989              | 166                                           | 1182                                             |
| <b>Right pars opercularis</b>                  | -0.036                                                | 18.243                | 0.668          | 0.989              | 161                                           | 1178                                             |
| <b>Left banks superior temporal sulcus</b>     | -0.035                                                | 13.510                | 0.694          | 0.989              | 147                                           | 1079                                             |
| <b>Right postcentral gyrus</b>                 | -0.035                                                | 32.220                | 0.678          | 0.989              | 160                                           | 1172                                             |
| <b>Right pericalcarine gyrus</b>               | -0.029                                                | 18.251                | 0.733          | 0.989              | 165                                           | 1171                                             |
| <b>Right lateral occipital cortex</b>          | -0.028                                                | 40.892                | 0.745          | 0.989              | 162                                           | 1176                                             |
| <b>Left precuneus</b>                          | -0.024                                                | 30.528                | 0.777          | 0.989              | 163                                           | 1189                                             |
| <b>Right caudal anterior cingulate cortex</b>  | -0.022                                                | 11.823                | 0.793          | 0.989              | 159                                           | 1184                                             |
| <b>Left rostral anterior cingulate cortex</b>  | -0.021                                                | 10.987                | 0.806          | 0.989              | 163                                           | 1170                                             |
| <b>Left fusiform gyrus</b>                     | -0.021                                                | 29.789                | 0.800          | 0.989              | 166                                           | 1182                                             |
| <b>Right frontal pole</b>                      | -0.017                                                | 3.611                 | 0.835          | 0.989              | 166                                           | 1188                                             |
| <b>Left transverse temporal cortex</b>         | -0.015                                                | 5.986                 | 0.858          | 0.989              | 164                                           | 1188                                             |
| <b>Right cuneus</b>                            | -0.015                                                | 15.570                | 0.858          | 0.989              | 161                                           | 1163                                             |
| <b>Left lingual gyrus</b>                      | -0.013                                                | 30.348                | 0.880          | 0.989              | 166                                           | 1183                                             |
| <b>Right superior parietal cortex</b>          | -0.013                                                | 43.663                | 0.880          | 0.989              | 160                                           | 1168                                             |

|                                     |        |         |       |       |     |      |
|-------------------------------------|--------|---------|-------|-------|-----|------|
| Left superior temporal gyrus        | -0.012 | 30.516  | 0.898 | 0.989 | 137 | 1069 |
| Left superior frontal gyrus         | -0.009 | 50.143  | 0.916 | 0.989 | 155 | 1142 |
| Right paracentral lobule            | -0.002 | 16.328  | 0.979 | 0.996 | 166 | 1186 |
| Left surface area                   | -0.001 | 384.272 | 0.994 | 1.000 | 166 | 1191 |
| Left cuneus                         | -0.001 | 15.998  | 0.990 | 0.996 | 159 | 1166 |
| Right transverse temporal cortex    | <0.001 | 4.480   | 0.996 | 0.996 | 166 | 1189 |
| Left superior parietal cortex       | <0.001 | 44.484  | 0.996 | 0.996 | 158 | 1171 |
| Left pars triangularis              | 0.004  | 15.061  | 0.964 | 0.996 | 165 | 1185 |
| Left pars opercularis               | 0.009  | 20.417  | 0.913 | 0.989 | 164 | 1185 |
| Left pars orbitalis                 | 0.011  | 6.092   | 0.892 | 0.989 | 164 | 1184 |
| Right superior frontal gyrus        | 0.011  | 50.378  | 0.898 | 0.989 | 160 | 1178 |
| Right parahippocampal gyrus         | 0.011  | 7.782   | 0.898 | 0.989 | 165 | 1182 |
| Right lingual gyrus                 | 0.022  | 30.143  | 0.789 | 0.989 | 165 | 1186 |
| Left supramarginal gyrus            | 0.022  | 40.164  | 0.803 | 0.989 | 144 | 1092 |
| Right superior temporal gyrus       | 0.026  | 26.118  | 0.765 | 0.989 | 151 | 1096 |
| Left pericalcarine gyrus            | 0.027  | 17.222  | 0.745 | 0.989 | 164 | 1177 |
| Right inferior parietal cortex      | 0.029  | 49.997  | 0.736 | 0.989 | 159 | 1154 |
| Left inferior parietal cortex       | 0.030  | 44.537  | 0.728 | 0.989 | 161 | 1141 |
| Left medial orbitofrontal cortex    | 0.033  | 17.264  | 0.698 | 0.989 | 166 | 1183 |
| Left insula                         | 0.034  | 16.570  | 0.685 | 0.989 | 165 | 1167 |
| Right precuneus                     | 0.037  | 32.663  | 0.659 | 0.989 | 164 | 1186 |
| Right rostral middle frontal gyrus  | 0.037  | 46.514  | 0.659 | 0.989 | 166 | 1186 |
| Left inferior temporal cortex gyrus | 0.038  | 32.812  | 0.655 | 0.989 | 164 | 1165 |
| Left posterior cingulate cortex     | 0.041  | 12.597  | 0.627 | 0.989 | 165 | 1186 |
| Left frontal pole                   | 0.042  | 2.807   | 0.615 | 0.989 | 163 | 1186 |
| Right surface area                  | 0.048  | 388.579 | 0.567 | 1.000 | 165 | 1190 |
| Left postcentral gyrus              | 0.051  | 34.044  | 0.548 | 0.989 | 160 | 1166 |
| Right supramarginal gyrus           | 0.053  | 38.462  | 0.550 | 0.989 | 148 | 1103 |
| Right posterior cingulate cortex    | 0.053  | 13.499  | 0.531 | 0.989 | 165 | 1188 |

|                                              |       |        |       |       |     |      |
|----------------------------------------------|-------|--------|-------|-------|-----|------|
| <b>Right insula</b>                          | 0.057 | 18.162 | 0.502 | 0.989 | 162 | 1160 |
| <b>Left lateral orbitofrontal cortex</b>     | 0.076 | 19.618 | 0.367 | 0.989 | 165 | 1188 |
| <b>Left rostral middle frontal gyrus</b>     | 0.083 | 45.961 | 0.324 | 0.989 | 165 | 1179 |
| <b>Left temporal pole</b>                    | 0.085 | 4.886  | 0.311 | 0.989 | 166 | 1186 |
| <b>Right fusiform gyrus</b>                  | 0.085 | 28.971 | 0.328 | 0.989 | 155 | 1164 |
| <b>Left caudal anterior cingulate cortex</b> | 0.096 | 10.657 | 0.257 | 0.989 | 164 | 1169 |
| <b>Right banks superior temporal sulcus</b>  | 0.100 | 10.933 | 0.259 | 0.989 | 147 | 1104 |
| <b>Right temporal pole</b>                   | 0.106 | 5.016  | 0.220 | 0.989 | 156 | 1166 |
| <b>Left entorhinal cortex</b>                | 0.114 | 6.740  | 0.212 | 0.989 | 137 | 1108 |
| <b>Right inferior temporal cortex gyrus</b>  | 0.133 | 32.182 | 0.116 | 0.873 | 163 | 1184 |
| <b>Right lateral orbitofrontal cortex</b>    | 0.143 | 20.951 | 0.088 | 0.748 | 166 | 1190 |
| <b>Right medial orbitofrontal cortex</b>     | 0.161 | 14.293 | 0.056 | 0.746 | 164 | 1183 |
| <b>Left middle temporal gyrus</b>            | 0.165 | 28.067 | 0.066 | 0.746 | 144 | 1089 |
| <b>Right entorhinal cortex</b>               | 0.193 | 7.884  | 0.042 | 0.746 | 127 | 1076 |
| <b>Right pars triangularis</b>               | 0.232 | 19.083 | 0.007 | 0.248 | 156 | 1166 |
| <b>Right middle temporal gyrus</b>           | 0.247 | 26.967 | 0.004 | 0.248 | 161 | 1167 |

**TABLE S14a:** Full mega-analytic results for cortical thickness of each structure for the pediatric OCD patients with current comorbid depression compared with pediatric healthy controls, controlling for age, sex and scan center.

|                                     | <b>Cohen's d<sup>a</sup><br/>(CurDep vs HC)</b> | <b>Standard Error</b> | <b>P-value</b> | <b>FDR P-value</b> | <b>N controls</b> | <b>N patients</b> |
|-------------------------------------|-------------------------------------------------|-----------------------|----------------|--------------------|-------------------|-------------------|
| Left isthmus cingulate cortex       | -0.576                                          | 0.045                 | 0.004          | 0.243              | 322               | 29                |
| Left cuneus                         | -0.547                                          | 0.032                 | 0.007          | 0.243              | 320               | 28                |
| Left precuneus                      | -0.378                                          | 0.030                 | 0.057          | 0.986              | 320               | 29                |
| Left lateral occipital cortex       | -0.368                                          | 0.026                 | 0.068          | 0.986              | 319               | 28                |
| Right postcentral gyrus             | -0.290                                          | 0.028                 | 0.159          | 0.986              | 309               | 27                |
| Left lingual gyrus                  | -0.277                                          | 0.028                 | 0.170          | 0.986              | 321               | 28                |
| Left superior parietal cortex       | -0.276                                          | 0.026                 | 0.165          | 0.986              | 317               | 29                |
| Left banks superior temporal sulcus | -0.229                                          | 0.043                 | 0.259          | 0.986              | 297               | 28                |
| Right lateral occipital cortex      | -0.227                                          | 0.027                 | 0.253          | 0.986              | 321               | 29                |
| Right superior parietal cortex      | -0.224                                          | 0.028                 | 0.267          | 0.986              | 320               | 28                |
| Left cortical thickness             | -0.199                                          | 0.021                 | 0.316          | 0.986              | 324               | 29                |
| Right precuneus                     | -0.198                                          | 0.028                 | 0.319          | 0.986              | 324               | 29                |
| Left middle temporal gyrus          | -0.190                                          | 0.041                 | 0.356          | 0.986              | 309               | 27                |
| Left pericalcarine gyrus            | -0.169                                          | 0.031                 | 0.410          | 0.986              | 320               | 27                |
| Left fusiform gyrus                 | -0.166                                          | 0.029                 | 0.405          | 0.986              | 314               | 29                |
| Left postcentral gyrus              | -0.164                                          | 0.025                 | 0.409          | 0.986              | 312               | 29                |
| Left pars opercularis               | -0.146                                          | 0.036                 | 0.494          | 0.986              | 319               | 25                |
| Left superior temporal gyrus        | -0.142                                          | 0.037                 | 0.489          | 0.986              | 304               | 27                |
| Right lingual gyrus                 | -0.138                                          | 0.028                 | 0.487          | 0.986              | 323               | 29                |
| Left precentral gyrus               | -0.124                                          | 0.032                 | 0.546          | 0.986              | 313               | 27                |
| Right pericalcarine gyrus           | -0.121                                          | 0.032                 | 0.542          | 0.986              | 323               | 29                |
| Left inferior temporal cortex gyrus | -0.106                                          | 0.037                 | 0.606          | 0.986              | 315               | 27                |
| Right paracentral lobule            | -0.096                                          | 0.036                 | 0.627          | 0.986              | 323               | 29                |
| Left inferior parietal cortex       | -0.089                                          | 0.035                 | 0.682          | 0.986              | 301               | 24                |
| Left entorhinal cortex              | -0.089                                          | 0.083                 | 0.677          | 0.986              | 287               | 25                |

|                                         |        |       |       |       |     |    |
|-----------------------------------------|--------|-------|-------|-------|-----|----|
| Right medial orbitofrontal cortex       | -0.083 | 0.041 | 0.681 | 0.986 | 319 | 28 |
| Left temporal pole                      | -0.063 | 0.087 | 0.749 | 0.986 | 321 | 29 |
| Right caudal middle frontal gyrus       | -0.059 | 0.038 | 0.768 | 0.986 | 318 | 28 |
| Left rostral middle frontal gyrus       | -0.058 | 0.031 | 0.771 | 0.986 | 321 | 29 |
| Right transverse temporal cortex        | -0.051 | 0.046 | 0.796 | 0.986 | 320 | 29 |
| Right banks superior temporal sulcus    | -0.050 | 0.042 | 0.807 | 0.986 | 298 | 28 |
| Right insula                            | -0.042 | 0.040 | 0.838 | 0.986 | 312 | 27 |
| Left medial orbitofrontal cortex        | -0.037 | 0.040 | 0.852 | 0.986 | 320 | 29 |
| Right cortical thickness                | -0.032 | 0.022 | 0.873 | 0.986 | 324 | 29 |
| Left pars orbitalis                     | -0.026 | 0.052 | 0.896 | 0.986 | 322 | 29 |
| Right superior frontal gyrus            | -0.021 | 0.036 | 0.919 | 0.986 | 310 | 28 |
| Left superior frontal gyrus             | -0.015 | 0.035 | 0.939 | 0.986 | 316 | 29 |
| Right isthmus cingulate cortex          | -0.014 | 0.048 | 0.946 | 0.986 | 322 | 28 |
| Right pars triangularis                 | -0.011 | 0.039 | 0.956 | 0.986 | 321 | 26 |
| Left supramarginal gyrus                | -0.007 | 0.032 | 0.971 | 0.986 | 299 | 28 |
| Right inferior parietal cortex          | -0.004 | 0.033 | 0.986 | 0.986 | 309 | 29 |
| Right entorhinal cortex                 | 0.004  | 0.088 | 0.986 | 0.986 | 276 | 23 |
| Right cuneus                            | 0.014  | 0.035 | 0.946 | 0.986 | 323 | 27 |
| Right pars opercularis                  | 0.018  | 0.039 | 0.933 | 0.986 | 316 | 26 |
| Right fusiform gyrus                    | 0.021  | 0.031 | 0.919 | 0.986 | 314 | 27 |
| Right lateral orbitofrontal cortex      | 0.021  | 0.037 | 0.917 | 0.986 | 322 | 29 |
| Left posterior cingulate cortex         | 0.027  | 0.038 | 0.893 | 0.986 | 320 | 29 |
| Right superior temporal gyrus           | 0.037  | 0.035 | 0.853 | 0.986 | 298 | 29 |
| Right rostral anterior cingulate cortex | 0.047  | 0.061 | 0.818 | 0.986 | 310 | 28 |
| Right rostral middle frontal gyrus      | 0.052  | 0.033 | 0.792 | 0.986 | 317 | 29 |
| Left insula                             | 0.053  | 0.035 | 0.793 | 0.986 | 315 | 28 |
| Left paracentral lobule                 | 0.057  | 0.037 | 0.777 | 0.986 | 321 | 28 |
| Left frontal pole                       | 0.057  | 0.073 | 0.775 | 0.986 | 323 | 29 |
| Right frontal pole                      | 0.064  | 0.077 | 0.746 | 0.986 | 319 | 29 |

|                                        |       |       |       |       |     |    |
|----------------------------------------|-------|-------|-------|-------|-----|----|
| Right parahippocampal gyrus            | 0.073 | 0.054 | 0.714 | 0.986 | 317 | 29 |
| Left lateral orbitofrontal cortex      | 0.096 | 0.036 | 0.630 | 0.986 | 324 | 29 |
| Left transverse temporal cortex        | 0.100 | 0.046 | 0.615 | 0.986 | 322 | 29 |
| Left pars triangularis                 | 0.119 | 0.038 | 0.567 | 0.986 | 321 | 26 |
| Right middle temporal gyrus            | 0.120 | 0.037 | 0.552 | 0.986 | 307 | 28 |
| Right pars orbitalis                   | 0.123 | 0.054 | 0.541 | 0.986 | 322 | 28 |
| Right temporal pole                    | 0.126 | 0.087 | 0.527 | 0.986 | 322 | 29 |
| Right supramarginal gyrus              | 0.147 | 0.033 | 0.469 | 0.986 | 303 | 28 |
| Right posterior cingulate cortex       | 0.166 | 0.036 | 0.402 | 0.986 | 322 | 29 |
| Left caudal anterior cingulate cortex  | 0.167 | 0.057 | 0.400 | 0.986 | 316 | 29 |
| Left caudal middle frontal gyrus       | 0.189 | 0.033 | 0.340 | 0.986 | 321 | 29 |
| Left rostral anterior cingulate cortex | 0.194 | 0.054 | 0.328 | 0.986 | 316 | 29 |
| Right inferior temporal cortex gyrus   | 0.244 | 0.037 | 0.226 | 0.986 | 320 | 28 |
| Right precentral gyrus                 | 0.248 | 0.032 | 0.245 | 0.986 | 312 | 25 |
| Right caudal anterior cingulate cortex | 0.255 | 0.057 | 0.208 | 0.986 | 310 | 28 |
| Left parahippocampal gyrus             | 0.336 | 0.064 | 0.091 | 0.986 | 317 | 29 |



**TABLE S14b:** Full mega-analytic results for cortical thickness of each structure for the pediatric OCD patients with no current comorbid depression compared with pediatric healthy controls, controlling for age, sex and scan center.

|                                      | <b>Cohen's d<sup>a</sup><br/>(NoCurDep vs HC)</b> | <b>Standard Error</b> | <b>P-value</b> | <b>FDR P-value</b> | <b>N controls</b> | <b>N patients</b> |
|--------------------------------------|---------------------------------------------------|-----------------------|----------------|--------------------|-------------------|-------------------|
| Left inferior parietal cortex        | -0.330                                            | 0.013                 | 4.613E-05      | 0.003              | 301               | 333               |
| Right superior parietal cortex       | -0.256                                            | 0.011                 | 0.001          | 0.031              | 320               | 346               |
| Right inferior parietal cortex       | -0.250                                            | 0.013                 | 0.002          | 0.031              | 309               | 335               |
| Left superior parietal cortex        | -0.248                                            | 0.011                 | 0.002          | 0.031              | 317               | 346               |
| Left lateral occipital cortex        | -0.213                                            | 0.010                 | 0.007          | 0.097              | 319               | 346               |
| Left precuneus                       | -0.206                                            | 0.012                 | 0.009          | 0.103              | 320               | 346               |
| Left supramarginal gyrus             | -0.185                                            | 0.013                 | 0.022          | 0.196              | 299               | 328               |
| Right cuneus                         | -0.181                                            | 0.013                 | 0.021          | 0.196              | 323               | 346               |
| Right caudal middle frontal gyrus    | -0.175                                            | 0.015                 | 0.027          | 0.208              | 318               | 344               |
| Left cuneus                          | -0.159                                            | 0.012                 | 0.044          | 0.277              | 320               | 347               |
| Left cortical thickness              | -0.159                                            | 0.008                 | 0.042          | 0.277              | 324               | 350               |
| Right cortical thickness             | -0.146                                            | 0.008                 | 0.061          | 0.355              | 324               | 350               |
| Left pericalcarine gyrus             | -0.141                                            | 0.012                 | 0.073          | 0.383              | 320               | 347               |
| Right precuneus                      | -0.136                                            | 0.012                 | 0.082          | 0.383              | 324               | 343               |
| Right lateral occipital cortex       | -0.133                                            | 0.011                 | 0.090          | 0.394              | 321               | 345               |
| Left posterior cingulate cortex      | -0.124                                            | 0.015                 | 0.114          | 0.433              | 320               | 344               |
| Right banks superior temporal sulcus | -0.122                                            | 0.017                 | 0.133          | 0.433              | 298               | 328               |
| Left banks superior temporal sulcus  | -0.122                                            | 0.017                 | 0.136          | 0.433              | 297               | 314               |
| Right pericalcarine gyrus            | -0.120                                            | 0.012                 | 0.126          | 0.433              | 323               | 345               |
| Left transverse temporal cortex      | -0.118                                            | 0.018                 | 0.133          | 0.433              | 322               | 347               |
| Right posterior cingulate cortex     | -0.117                                            | 0.014                 | 0.136          | 0.433              | 322               | 344               |
| Left isthmus cingulate cortex        | -0.113                                            | 0.018                 | 0.149          | 0.454              | 322               | 343               |
| Left middle temporal gyrus           | -0.112                                            | 0.016                 | 0.162          | 0.466              | 309               | 335               |
| Left paracentral lobule              | -0.109                                            | 0.015                 | 0.166          | 0.466              | 321               | 347               |
| Right supramarginal gyrus            | -0.105                                            | 0.013                 | 0.190          | 0.489              | 303               | 332               |

|                                         |        |       |       |       |     |     |
|-----------------------------------------|--------|-------|-------|-------|-----|-----|
| Right rostral middle frontal gyrus      | -0.102 | 0.013 | 0.196 | 0.489 | 317 | 347 |
| Left precentral gyrus                   | -0.093 | 0.012 | 0.239 | 0.545 | 313 | 343 |
| Left fusiform gyrus                     | -0.093 | 0.012 | 0.236 | 0.545 | 314 | 346 |
| Right precentral gyrus                  | -0.090 | 0.012 | 0.256 | 0.561 | 312 | 343 |
| Right middle temporal gyrus             | -0.087 | 0.015 | 0.275 | 0.582 | 307 | 335 |
| Left lingual gyrus                      | -0.082 | 0.011 | 0.294 | 0.598 | 321 | 347 |
| Left postcentral gyrus                  | -0.081 | 0.010 | 0.308 | 0.598 | 312 | 335 |
| Left caudal middle frontal gyrus        | -0.081 | 0.014 | 0.299 | 0.598 | 321 | 348 |
| Left superior frontal gyrus             | -0.078 | 0.014 | 0.322 | 0.609 | 316 | 341 |
| Right postcentral gyrus                 | -0.077 | 0.011 | 0.332 | 0.611 | 309 | 339 |
| Right inferior temporal cortex gyrus    | -0.074 | 0.014 | 0.349 | 0.615 | 320 | 339 |
| Right superior frontal gyrus            | -0.074 | 0.015 | 0.351 | 0.615 | 310 | 341 |
| Left frontal pole                       | -0.071 | 0.030 | 0.361 | 0.617 | 323 | 348 |
| Right isthmus cingulate cortex          | -0.070 | 0.017 | 0.375 | 0.625 | 322 | 344 |
| Left inferior temporal cortex gyrus     | -0.068 | 0.015 | 0.392 | 0.639 | 315 | 343 |
| Right fusiform gyrus                    | -0.066 | 0.012 | 0.403 | 0.641 | 314 | 347 |
| Right rostral anterior cingulate cortex | -0.061 | 0.023 | 0.443 | 0.690 | 310 | 342 |
| Right parahippocampal gyrus             | -0.053 | 0.022 | 0.501 | 0.749 | 317 | 341 |
| Right insula                            | -0.052 | 0.015 | 0.510 | 0.749 | 312 | 339 |
| Right pars triangularis                 | -0.049 | 0.015 | 0.533 | 0.761 | 321 | 348 |
| Right paracentral lobule                | -0.048 | 0.014 | 0.544 | 0.761 | 323 | 346 |
| Right pars orbitalis                    | -0.046 | 0.020 | 0.560 | 0.769 | 322 | 348 |
| Left parahippocampal gyrus              | -0.042 | 0.025 | 0.590 | 0.793 | 317 | 343 |
| Left medial orbitofrontal cortex        | -0.037 | 0.016 | 0.642 | 0.833 | 320 | 343 |
| Left rostral middle frontal gyrus       | -0.031 | 0.012 | 0.690 | 0.878 | 321 | 349 |
| Right superior temporal gyrus           | -0.030 | 0.015 | 0.713 | 0.882 | 298 | 331 |
| Left pars triangularis                  | -0.028 | 0.015 | 0.718 | 0.882 | 321 | 349 |
| Left pars opercularis                   | -0.026 | 0.014 | 0.742 | 0.895 | 319 | 346 |
| Left entorhinal cortex                  | -0.021 | 0.031 | 0.794 | 0.911 | 287 | 323 |

|                                        |        |       |       |       |     |     |
|----------------------------------------|--------|-------|-------|-------|-----|-----|
| Left caudal anterior cingulate cortex  | -0.019 | 0.023 | 0.812 | 0.916 | 316 | 339 |
| Right transverse temporal cortex       | -0.017 | 0.019 | 0.832 | 0.924 | 320 | 349 |
| Left pars orbitalis                    | -0.014 | 0.021 | 0.863 | 0.930 | 322 | 346 |
| Right pars opercularis                 | -0.014 | 0.015 | 0.860 | 0.930 | 316 | 346 |
| Right lingual gyrus                    | -0.011 | 0.011 | 0.884 | 0.937 | 323 | 349 |
| Right entorhinal cortex                | -0.002 | 0.032 | 0.978 | 0.978 | 276 | 304 |
| Right temporal pole                    | 0.007  | 0.035 | 0.931 | 0.944 | 322 | 343 |
| Right frontal pole                     | 0.007  | 0.029 | 0.931 | 0.944 | 319 | 349 |
| Left insula                            | 0.008  | 0.014 | 0.923 | 0.944 | 315 | 341 |
| Left temporal pole                     | 0.021  | 0.034 | 0.787 | 0.911 | 321 | 343 |
| Left superior temporal gyrus           | 0.022  | 0.015 | 0.781 | 0.911 | 304 | 326 |
| Right caudal anterior cingulate cortex | 0.041  | 0.022 | 0.600 | 0.793 | 310 | 345 |
| Right lateral orbitofrontal cortex     | 0.051  | 0.015 | 0.513 | 0.749 | 322 | 348 |
| Left rostral anterior cingulate cortex | 0.093  | 0.022 | 0.241 | 0.545 | 316 | 338 |
| Left lateral orbitofrontal cortex      | 0.104  | 0.015 | 0.182 | 0.489 | 324 | 349 |
| Right medial orbitofrontal cortex      | 0.138  | 0.016 | 0.081 | 0.383 | 319 | 341 |

**TABLE S14c:** Full mega-analytic results for cortical thickness of each structure for the pediatric OCD patients with current comorbid depression compared with pediatric patients without, controlling for age, sex and scan center.

|                                     | Cohen's d <sup>a</sup><br>(NoCurDep vs CurDep) | Standard Error | P-value | FDR P-value | N patients with<br>current depression | N patients with no<br>current depression |
|-------------------------------------|------------------------------------------------|----------------|---------|-------------|---------------------------------------|------------------------------------------|
| Left isthmus cingulate cortex       | -0.434                                         | 0.046          | 0.028   | 0.957       | 29                                    | 343                                      |
| Left lateral occipital cortex       | -0.411                                         | 0.026          | 0.041   | 0.957       | 28                                    | 346                                      |
| Left cuneus                         | -0.370                                         | 0.028          | 0.066   | 0.957       | 28                                    | 347                                      |
| Right lateral occipital cortex      | -0.345                                         | 0.026          | 0.080   | 0.957       | 29                                    | 345                                      |
| Left entorhinal cortex              | -0.307                                         | 0.080          | 0.148   | 0.957       | 25                                    | 323                                      |
| Left superior temporal gyrus        | -0.285                                         | 0.038          | 0.164   | 0.957       | 27                                    | 326                                      |
| Right postcentral gyrus             | -0.272                                         | 0.028          | 0.184   | 0.957       | 27                                    | 339                                      |
| Left precuneus                      | -0.206                                         | 0.031          | 0.297   | 0.957       | 29                                    | 346                                      |
| Left banks superior temporal sulcus | -0.206                                         | 0.040          | 0.306   | 0.957       | 28                                    | 314                                      |
| Left fusiform gyrus                 | -0.205                                         | 0.030          | 0.298   | 0.957       | 29                                    | 346                                      |
| Left lingual gyrus                  | -0.198                                         | 0.028          | 0.324   | 0.957       | 28                                    | 347                                      |
| Left inferior temporal cortex gyrus | -0.188                                         | 0.040          | 0.357   | 0.957       | 27                                    | 343                                      |
| Left middle temporal gyrus          | -0.187                                         | 0.039          | 0.360   | 0.957       | 27                                    | 335                                      |
| Right medial orbitofrontal cortex   | -0.181                                         | 0.044          | 0.368   | 0.957       | 28                                    | 341                                      |
| Left temporal pole                  | -0.145                                         | 0.088          | 0.462   | 0.957       | 29                                    | 343                                      |
| Right insula                        | -0.137                                         | 0.040          | 0.502   | 0.957       | 27                                    | 339                                      |
| Left pars opercularis               | -0.134                                         | 0.037          | 0.526   | 0.957       | 25                                    | 346                                      |
| Left insula                         | -0.119                                         | 0.036          | 0.552   | 0.957       | 28                                    | 341                                      |
| Right pericalcarine gyrus           | -0.116                                         | 0.030          | 0.555   | 0.957       | 29                                    | 345                                      |
| Left cortical thickness             | -0.115                                         | 0.022          | 0.561   | 0.957       | 29                                    | 350                                      |
| Left postcentral gyrus              | -0.102                                         | 0.027          | 0.606   | 0.957       | 29                                    | 335                                      |
| Left lateral orbitofrontal cortex   | -0.066                                         | 0.040          | 0.737   | 0.957       | 29                                    | 349                                      |
| Right pars opercularis              | -0.059                                         | 0.039          | 0.777   | 0.957       | 26                                    | 346                                      |
| Left pericalcarine gyrus            | -0.053                                         | 0.031          | 0.796   | 0.957       | 27                                    | 347                                      |
| Right precuneus                     | -0.053                                         | 0.031          | 0.788   | 0.957       | 29                                    | 343                                      |

|                                         |        |       |       |       |    |     |
|-----------------------------------------|--------|-------|-------|-------|----|-----|
| Left pars orbitalis                     | -0.053 | 0.055 | 0.787 | 0.957 | 29 | 346 |
| Left superior parietal cortex           | -0.051 | 0.029 | 0.797 | 0.957 | 29 | 346 |
| Right paracentral lobule                | -0.047 | 0.036 | 0.810 | 0.957 | 29 | 346 |
| Right entorhinal cortex                 | -0.046 | 0.083 | 0.836 | 0.957 | 23 | 304 |
| Right superior temporal gyrus           | -0.034 | 0.037 | 0.865 | 0.957 | 29 | 331 |
| Left medial orbitofrontal cortex        | -0.031 | 0.042 | 0.876 | 0.957 | 29 | 343 |
| Right lingual gyrus                     | -0.028 | 0.029 | 0.887 | 0.957 | 29 | 349 |
| Left posterior cingulate cortex         | -0.027 | 0.037 | 0.893 | 0.957 | 29 | 344 |
| Right transverse temporal cortex        | -0.025 | 0.049 | 0.901 | 0.957 | 29 | 349 |
| Right superior parietal cortex          | -0.021 | 0.030 | 0.916 | 0.957 | 28 | 346 |
| Right rostral anterior cingulate cortex | -0.007 | 0.059 | 0.974 | 0.974 | 28 | 342 |
| Left rostral anterior cingulate cortex  | 0.009  | 0.060 | 0.963 | 0.974 | 29 | 338 |
| Right posterior cingulate cortex        | 0.018  | 0.033 | 0.928 | 0.957 | 29 | 344 |
| Right banks superior temporal sulcus    | 0.018  | 0.042 | 0.930 | 0.957 | 28 | 328 |
| Right lateral orbitofrontal cortex      | 0.031  | 0.038 | 0.874 | 0.957 | 29 | 348 |
| Left rostral middle frontal gyrus       | 0.031  | 0.032 | 0.877 | 0.957 | 29 | 349 |
| Right fusiform gyrus                    | 0.035  | 0.030 | 0.865 | 0.957 | 27 | 347 |
| Left transverse temporal cortex         | 0.037  | 0.047 | 0.850 | 0.957 | 29 | 347 |
| Left precentral gyrus                   | 0.040  | 0.031 | 0.843 | 0.957 | 27 | 343 |
| Right cortical thickness                | 0.060  | 0.022 | 0.760 | 0.957 | 29 | 350 |
| Right parahippocampal gyrus             | 0.066  | 0.060 | 0.738 | 0.957 | 29 | 341 |
| Right temporal pole                     | 0.076  | 0.089 | 0.699 | 0.957 | 29 | 343 |
| Right pars triangularis                 | 0.077  | 0.040 | 0.710 | 0.957 | 26 | 348 |
| Right caudal middle frontal gyrus       | 0.077  | 0.040 | 0.702 | 0.957 | 28 | 344 |
| Left caudal anterior cingulate cortex   | 0.080  | 0.061 | 0.686 | 0.957 | 29 | 339 |
| Left frontal pole                       | 0.083  | 0.080 | 0.672 | 0.957 | 29 | 348 |
| Right cuneus                            | 0.088  | 0.034 | 0.665 | 0.957 | 27 | 346 |
| Right middle temporal gyrus             | 0.096  | 0.039 | 0.631 | 0.957 | 28 | 335 |
| Left pars triangularis                  | 0.111  | 0.041 | 0.593 | 0.957 | 26 | 349 |

|                                        |       |       |       |       |    |     |
|----------------------------------------|-------|-------|-------|-------|----|-----|
| Left inferior parietal cortex          | 0.115 | 0.034 | 0.595 | 0.957 | 24 | 333 |
| Left superior frontal gyrus            | 0.121 | 0.037 | 0.540 | 0.957 | 29 | 341 |
| Right inferior parietal cortex         | 0.125 | 0.033 | 0.525 | 0.957 | 29 | 335 |
| Right superior frontal gyrus           | 0.136 | 0.039 | 0.496 | 0.957 | 28 | 341 |
| Right rostral middle frontal gyrus     | 0.151 | 0.033 | 0.443 | 0.957 | 29 | 347 |
| Left supramarginal gyrus               | 0.166 | 0.034 | 0.409 | 0.957 | 28 | 328 |
| Right inferior temporal cortex gyrus   | 0.173 | 0.038 | 0.389 | 0.957 | 28 | 339 |
| Right caudal anterior cingulate cortex | 0.174 | 0.058 | 0.386 | 0.957 | 28 | 345 |
| Left paracentral lobule                | 0.188 | 0.037 | 0.347 | 0.957 | 28 | 347 |
| Right frontal pole                     | 0.213 | 0.072 | 0.280 | 0.957 | 29 | 349 |
| Right supramarginal gyrus              | 0.223 | 0.032 | 0.267 | 0.957 | 28 | 332 |
| Right pars orbitalis                   | 0.226 | 0.051 | 0.259 | 0.957 | 28 | 348 |
| Right isthmus cingulate cortex         | 0.227 | 0.044 | 0.257 | 0.957 | 28 | 344 |
| Left caudal middle frontal gyrus       | 0.269 | 0.038 | 0.173 | 0.957 | 29 | 348 |
| Right precentral gyrus                 | 0.284 | 0.034 | 0.180 | 0.957 | 25 | 343 |
| Left parahippocampal gyrus             | 0.288 | 0.061 | 0.145 | 0.957 | 29 | 343 |

**TABLE S15a:** Full mega-analytic results for surface area of each structure for the pediatric OCD patients with current comorbid depression compared with pediatric healthy controls, controlling for age, sex, scan center and ICV.

|                                              | <b>Cohen's d<sup>a</sup><br/>(CurDep vs HC)</b> | <b>Standard Error</b> | <b>P-value</b> | <b>FDR P-value</b> | <b>N controls</b> | <b>N patients</b> |
|----------------------------------------------|-------------------------------------------------|-----------------------|----------------|--------------------|-------------------|-------------------|
| <b>Left inferior parietal cortex</b>         | -0.455                                          | 112.972               | 0.037          | 0.990              | 301               | 24                |
| <b>Left postcentral gyrus</b>                | -0.295                                          | 84.188                | 0.139          | 0.990              | 312               | 29                |
| <b>Left fusiform gyrus</b>                   | -0.277                                          | 71.366                | 0.165          | 0.990              | 314               | 29                |
| <b>Right postcentral gyrus</b>               | -0.271                                          | 81.630                | 0.189          | 0.990              | 309               | 27                |
| <b>Left lateral orbitofrontal cortex</b>     | -0.257                                          | 50.667                | 0.195          | 0.990              | 324               | 29                |
| <b>Right fusiform gyrus</b>                  | -0.230                                          | 70.939                | 0.265          | 0.990              | 314               | 27                |
| <b>Left cuneus</b>                           | -0.228                                          | 39.605                | 0.260          | 0.990              | 320               | 28                |
| <b>Left pericalcarine gyrus</b>              | -0.221                                          | 45.839                | 0.282          | 0.990              | 320               | 27                |
| <b>Right middle temporal gyrus</b>           | -0.220                                          | 73.079                | 0.277          | 0.990              | 307               | 28                |
| <b>Right pericalcarine gyrus</b>             | -0.213                                          | 50.257                | 0.284          | 0.990              | 323               | 29                |
| <b>Right superior frontal gyrus</b>          | -0.202                                          | 131.715               | 0.319          | 0.990              | 310               | 28                |
| <b>Left paracentral lobule</b>               | -0.192                                          | 37.149                | 0.342          | 0.990              | 321               | 28                |
| <b>Left precentral gyrus</b>                 | -0.183                                          | 88.600                | 0.373          | 0.990              | 313               | 27                |
| <b>Right inferior parietal cortex</b>        | -0.175                                          | 122.731               | 0.379          | 0.990              | 309               | 29                |
| <b>Right superior temporal gyrus</b>         | -0.172                                          | 65.119                | 0.390          | 0.990              | 298               | 29                |
| <b>Right surface area</b>                    | -0.170                                          | 987.939               | 0.393          | 1.000              | 324               | 29                |
| <b>Left superior frontal gyrus</b>           | -0.160                                          | 125.904               | 0.421          | 0.990              | 316               | 29                |
| <b>Right medial orbitofrontal cortex</b>     | -0.159                                          | 38.041                | 0.430          | 0.990              | 319               | 28                |
| <b>Left parahippocampal gyrus</b>            | -0.154                                          | 21.624                | 0.440          | 0.990              | 317               | 29                |
| <b>Right paracentral lobule</b>              | -0.149                                          | 41.250                | 0.454          | 0.990              | 323               | 29                |
| <b>Right rostral middle frontal gyrus</b>    | -0.133                                          | 129.609               | 0.503          | 0.990              | 317               | 29                |
| <b>Left caudal anterior cingulate cortex</b> | -0.114                                          | 26.999                | 0.568          | 0.990              | 316               | 29                |
| <b>Right entorhinal cortex</b>               | -0.104                                          | 18.025                | 0.641          | 0.990              | 276               | 23                |
| <b>Right cuneus</b>                          | -0.098                                          | 42.611                | 0.632          | 0.990              | 323               | 27                |
| <b>Left surface area</b>                     | -0.092                                          | 978.052               | 0.645          | 1.000              | 324               | 29                |

|                                        |        |         |       |       |     |    |
|----------------------------------------|--------|---------|-------|-------|-----|----|
| Right posterior cingulate cortex       | -0.092 | 32.767  | 0.644 | 0.990 | 322 | 29 |
| Right precuneus                        | -0.089 | 84.396  | 0.655 | 0.990 | 324 | 29 |
| Right inferior temporal cortex gyrus   | -0.082 | 81.835  | 0.686 | 0.990 | 320 | 28 |
| Right precentral gyrus                 | -0.082 | 87.096  | 0.700 | 0.990 | 312 | 25 |
| Right parahippocampal gyrus            | -0.077 | 18.976  | 0.699 | 0.990 | 317 | 29 |
| Left entorhinal cortex                 | -0.076 | 16.172  | 0.723 | 0.990 | 287 | 25 |
| Right transverse temporal cortex       | -0.075 | 10.312  | 0.707 | 0.990 | 320 | 29 |
| Left rostral anterior cingulate cortex | -0.074 | 28.532  | 0.711 | 0.990 | 316 | 29 |
| Right banks superior temporal sulcus   | -0.068 | 25.531  | 0.739 | 0.990 | 298 | 28 |
| Right lingual gyrus                    | -0.049 | 78.703  | 0.805 | 0.990 | 323 | 29 |
| Left superior temporal gyrus           | -0.039 | 72.470  | 0.850 | 0.990 | 304 | 27 |
| Left caudal middle frontal gyrus       | -0.037 | 72.449  | 0.852 | 0.990 | 321 | 29 |
| Right lateral occipital cortex         | -0.027 | 101.613 | 0.893 | 0.990 | 321 | 29 |
| Left frontal pole                      | -0.024 | 6.918   | 0.903 | 0.990 | 323 | 29 |
| Right pars opercularis                 | -0.023 | 45.253  | 0.912 | 0.990 | 316 | 26 |
| Left lateral occipital cortex          | -0.023 | 100.161 | 0.909 | 0.990 | 319 | 28 |
| Left temporal pole                     | -0.022 | 13.043  | 0.912 | 0.990 | 321 | 29 |
| Left rostral middle frontal gyrus      | -0.013 | 126.109 | 0.948 | 0.990 | 321 | 29 |
| Right superior parietal cortex         | -0.012 | 110.257 | 0.954 | 0.990 | 320 | 28 |
| Left banks superior temporal sulcus    | -0.007 | 33.484  | 0.974 | 0.990 | 297 | 28 |
| Right frontal pole                     | 0.001  | 9.681   | 0.994 | 0.994 | 319 | 29 |
| Left superior parietal cortex          | 0.006  | 108.165 | 0.976 | 0.990 | 317 | 29 |
| Left pars orbitalis                    | 0.008  | 16.667  | 0.968 | 0.990 | 322 | 29 |
| Left insula                            | 0.011  | 41.523  | 0.956 | 0.990 | 315 | 28 |
| Right caudal middle frontal gyrus      | 0.013  | 71.492  | 0.950 | 0.990 | 318 | 28 |
| Right caudal anterior cingulate cortex | 0.015  | 28.627  | 0.940 | 0.990 | 310 | 28 |
| Left posterior cingulate cortex        | 0.023  | 34.525  | 0.908 | 0.990 | 320 | 29 |
| Left precuneus                         | 0.026  | 79.542  | 0.897 | 0.990 | 320 | 29 |
| Left pars triangularis                 | 0.035  | 39.958  | 0.866 | 0.990 | 321 | 26 |



|                                         |       |        |       |       |     |    |
|-----------------------------------------|-------|--------|-------|-------|-----|----|
| Right lateral orbitofrontal cortex      | 0.045 | 55.522 | 0.822 | 0.990 | 322 | 29 |
| Right insula                            | 0.062 | 41.157 | 0.762 | 0.990 | 312 | 27 |
| Right pars orbitalis                    | 0.064 | 20.080 | 0.752 | 0.990 | 322 | 28 |
| Right pars triangularis                 | 0.067 | 49.734 | 0.749 | 0.990 | 321 | 26 |
| Left middle temporal gyrus              | 0.070 | 62.632 | 0.734 | 0.990 | 309 | 27 |
| Left lingual gyrus                      | 0.088 | 79.434 | 0.661 | 0.990 | 321 | 28 |
| Left inferior temporal cortex gyrus     | 0.098 | 94.892 | 0.635 | 0.990 | 315 | 27 |
| Left transverse temporal cortex         | 0.100 | 13.462 | 0.614 | 0.990 | 322 | 29 |
| Right rostral anterior cingulate cortex | 0.165 | 24.213 | 0.415 | 0.990 | 310 | 28 |
| Left supramarginal gyrus                | 0.179 | 92.826 | 0.378 | 0.990 | 299 | 28 |
| Right supramarginal gyrus               | 0.189 | 96.292 | 0.352 | 0.990 | 303 | 28 |
| Right temporal pole                     | 0.193 | 13.164 | 0.332 | 0.990 | 322 | 29 |
| Left pars opercularis                   | 0.204 | 54.313 | 0.338 | 0.990 | 319 | 25 |
| Left medial orbitofrontal cortex        | 0.218 | 42.730 | 0.274 | 0.990 | 320 | 29 |
| Right isthmus cingulate cortex          | 0.291 | 27.149 | 0.149 | 0.990 | 322 | 28 |
| Left isthmus cingulate cortex           | 0.351 | 30.836 | 0.078 | 0.990 | 322 | 29 |

**TABLE S15b:** Full mega-analytic results for surface area of each structure for the pediatric OCD patients with no current comorbid depression compared with pediatric healthy controls, controlling for age, sex, scan center and ICV.

|                                    | <b>Cohen's d<sup>a</sup><br/>(NoCurDep vs HC)</b> | <b>Standard Error</b> | <b>P-value</b> | <b>FDR P-value</b> | <b>N controls</b> | <b>N patients</b> |
|------------------------------------|---------------------------------------------------|-----------------------|----------------|--------------------|-------------------|-------------------|
| Left posterior cingulate cortex    | -0.274                                            | 13.397                | 0.001          | 0.036              | 320               | 343               |
| Right medial orbitofrontal cortex  | -0.233                                            | 14.817                | 0.003          | 0.110              | 319               | 340               |
| Right paracentral lobule           | -0.222                                            | 16.251                | 0.005          | 0.110              | 323               | 345               |
| Right superior frontal gyrus       | -0.210                                            | 52.090                | 0.009          | 0.145              | 310               | 340               |
| Left inferior parietal cortex      | -0.207                                            | 41.269                | 0.011          | 0.145              | 301               | 332               |
| Left medial orbitofrontal cortex   | -0.189                                            | 17.569                | 0.016          | 0.187              | 320               | 342               |
| Left rostral middle frontal gyrus  | -0.179                                            | 48.333                | 0.023          | 0.205              | 321               | 348               |
| Right posterior cingulate cortex   | -0.171                                            | 13.107                | 0.030          | 0.205              | 322               | 343               |
| Left lateral orbitofrontal cortex  | -0.171                                            | 21.519                | 0.029          | 0.205              | 324               | 348               |
| Right fusiform gyrus               | -0.154                                            | 27.582                | 0.052          | 0.319              | 314               | 346               |
| Left paracentral lobule            | -0.148                                            | 14.081                | 0.060          | 0.338              | 321               | 346               |
| Left middle temporal gyrus         | -0.145                                            | 25.890                | 0.071          | 0.343              | 309               | 334               |
| Right pars triangularis            | -0.141                                            | 17.718                | 0.073          | 0.343              | 321               | 347               |
| Left superior frontal gyrus        | -0.141                                            | 48.485                | 0.076          | 0.343              | 316               | 340               |
| Left insula                        | -0.134                                            | 16.586                | 0.092          | 0.368              | 315               | 340               |
| Right lateral occipital cortex     | -0.130                                            | 40.396                | 0.098          | 0.368              | 321               | 344               |
| Right rostral middle frontal gyrus | -0.122                                            | 50.347                | 0.122          | 0.430              | 317               | 346               |
| Right surface area                 | -0.121                                            | 400.583               | 0.121          | 1.000              | 324               | 349               |
| Right cuneus                       | -0.120                                            | 15.641                | 0.127          | 0.430              | 323               | 345               |
| Left surface area                  | -0.111                                            | 393.942               | 0.155          | 1.000              | 324               | 349               |
| Left postcentral gyrus             | -0.110                                            | 33.419                | 0.170          | 0.525              | 312               | 334               |
| Left pars orbitalis                | -0.109                                            | 6.303                 | 0.163          | 0.525              | 322               | 345               |
| Right pars orbitalis               | -0.105                                            | 7.583                 | 0.180          | 0.533              | 322               | 347               |
| Left superior parietal cortex      | -0.101                                            | 44.261                | 0.201          | 0.570              | 317               | 345               |
| Right lingual gyrus                | -0.096                                            | 30.533                | 0.220          | 0.596              | 323               | 348               |

|                                         |        |        |       |       |     |     |
|-----------------------------------------|--------|--------|-------|-------|-----|-----|
| Right lateral orbitofrontal cortex      | -0.094 | 22.220 | 0.233 | 0.596 | 322 | 347 |
| Left pericalcarine gyrus                | -0.091 | 17.477 | 0.245 | 0.596 | 320 | 346 |
| Left cuneus                             | -0.085 | 15.195 | 0.280 | 0.635 | 320 | 346 |
| Right superior parietal cortex          | -0.085 | 43.684 | 0.279 | 0.635 | 320 | 345 |
| Left caudal anterior cingulate cortex   | -0.081 | 10.442 | 0.308 | 0.666 | 316 | 338 |
| Left precuneus                          | -0.079 | 31.263 | 0.313 | 0.666 | 320 | 345 |
| Left pars opercularis                   | -0.071 | 19.759 | 0.366 | 0.753 | 319 | 345 |
| Right supramarginal gyrus               | -0.068 | 37.790 | 0.400 | 0.776 | 303 | 331 |
| Left rostral anterior cingulate cortex  | -0.063 | 11.350 | 0.430 | 0.790 | 316 | 337 |
| Right insula                            | -0.063 | 17.091 | 0.425 | 0.790 | 312 | 338 |
| Right inferior parietal cortex          | -0.058 | 48.478 | 0.466 | 0.833 | 309 | 334 |
| Right pericalcarine gyrus               | -0.055 | 18.726 | 0.483 | 0.833 | 323 | 344 |
| Right postcentral gyrus                 | -0.050 | 31.710 | 0.534 | 0.858 | 309 | 338 |
| Left lingual gyrus                      | -0.049 | 30.791 | 0.532 | 0.858 | 321 | 346 |
| Left precentral gyrus                   | -0.045 | 32.647 | 0.567 | 0.876 | 313 | 342 |
| Left caudal middle frontal gyrus        | -0.037 | 27.988 | 0.634 | 0.952 | 321 | 347 |
| Right parahippocampal gyrus             | -0.030 | 7.911  | 0.708 | 0.952 | 317 | 340 |
| Right pars opercularis                  | -0.028 | 16.559 | 0.718 | 0.952 | 316 | 345 |
| Right precentral gyrus                  | -0.024 | 32.078 | 0.761 | 0.952 | 312 | 342 |
| Right precuneus                         | -0.022 | 32.768 | 0.782 | 0.952 | 324 | 342 |
| Right isthmus cingulate cortex          | -0.017 | 10.639 | 0.825 | 0.952 | 322 | 343 |
| Right rostral anterior cingulate cortex | -0.017 | 9.763  | 0.826 | 0.952 | 310 | 341 |
| Left fusiform gyrus                     | -0.013 | 29.023 | 0.866 | 0.964 | 314 | 345 |
| Right middle temporal gyrus             | -0.009 | 28.789 | 0.915 | 0.964 | 307 | 334 |
| Right caudal middle frontal gyrus       | -0.005 | 27.338 | 0.951 | 0.964 | 318 | 343 |
| Left banks superior temporal sulcus     | -0.004 | 13.499 | 0.964 | 0.964 | 297 | 313 |
| Left lateral occipital cortex           | 0.004  | 38.313 | 0.957 | 0.964 | 319 | 345 |
| Left entorhinal cortex                  | 0.006  | 6.201  | 0.939 | 0.964 | 287 | 322 |
| Left superior temporal gyrus            | 0.006  | 28.970 | 0.939 | 0.964 | 304 | 325 |

|                                        |       |        |       |       |     |     |
|----------------------------------------|-------|--------|-------|-------|-----|-----|
| Left inferior temporal cortex gyrus    | 0.007 | 34.559 | 0.934 | 0.964 | 315 | 342 |
| Right caudal anterior cingulate cortex | 0.009 | 10.920 | 0.911 | 0.964 | 310 | 344 |
| Left frontal pole                      | 0.018 | 2.851  | 0.817 | 0.952 | 323 | 347 |
| Left supramarginal gyrus               | 0.019 | 38.257 | 0.819 | 0.952 | 299 | 327 |
| Right superior temporal gyrus          | 0.022 | 26.526 | 0.781 | 0.952 | 298 | 330 |
| Right inferior temporal cortex gyrus   | 0.024 | 32.165 | 0.761 | 0.952 | 320 | 338 |
| Right temporal pole                    | 0.025 | 4.958  | 0.754 | 0.952 | 322 | 342 |
| Left pars triangularis                 | 0.027 | 14.510 | 0.734 | 0.952 | 321 | 348 |
| Left transverse temporal cortex        | 0.035 | 5.433  | 0.651 | 0.952 | 322 | 346 |
| Right banks superior temporal sulcus   | 0.036 | 10.635 | 0.661 | 0.952 | 298 | 327 |
| Left parahippocampal gyrus             | 0.048 | 8.448  | 0.542 | 0.858 | 317 | 342 |
| Right entorhinal cortex                | 0.058 | 6.545  | 0.490 | 0.833 | 276 | 303 |
| Left isthmus cingulate cortex          | 0.068 | 12.054 | 0.388 | 0.775 | 322 | 343 |
| Right transverse temporal cortex       | 0.093 | 4.499  | 0.237 | 0.596 | 320 | 348 |
| Left temporal pole                     | 0.131 | 5.191  | 0.097 | 0.368 | 321 | 342 |
| Right frontal pole                     | 0.176 | 3.533  | 0.025 | 0.205 | 319 | 348 |

**TABLE S15c:** Full mega-analytic results for surface area of each structure for the pediatric OCD patients with current comorbid depression compared with pediatric patients without, controlling for age, sex, scan center and ICV.

|                                        | <b>Cohen's d<sup>a</sup><br/>(NoCurDep vs CurDep)</b> | <b>Standard Error</b> | <b>P-value</b> | <b>FDR P-value</b> | <b>N patients with<br/>current depression</b> | <b>N patients with no<br/>current depression</b> |
|----------------------------------------|-------------------------------------------------------|-----------------------|----------------|--------------------|-----------------------------------------------|--------------------------------------------------|
| Left inferior parietal cortex          | -0.404                                                | 113.987               | 0.062          | 0.989              | 24                                            | 332                                              |
| Right entorhinal cortex                | -0.287                                                | 17.075                | 0.195          | 0.989              | 23                                            | 303                                              |
| Right transverse temporal cortex       | -0.272                                                | 12.316                | 0.168          | 0.989              | 29                                            | 348                                              |
| Right superior temporal gyrus          | -0.244                                                | 67.598                | 0.218          | 0.989              | 29                                            | 330                                              |
| Left fusiform gyrus                    | -0.230                                                | 74.602                | 0.245          | 0.989              | 29                                            | 345                                              |
| Left superior frontal gyrus            | -0.214                                                | 123.022               | 0.279          | 0.989              | 29                                            | 340                                              |
| Left precentral gyrus                  | -0.212                                                | 85.299                | 0.300          | 0.989              | 27                                            | 342                                              |
| Left superior temporal gyrus           | -0.192                                                | 75.891                | 0.348          | 0.989              | 27                                            | 325                                              |
| Left paracentral lobule                | -0.191                                                | 34.847                | 0.343          | 0.989              | 28                                            | 346                                              |
| Right postcentral gyrus                | -0.169                                                | 84.791                | 0.408          | 0.989              | 27                                            | 338                                              |
| Left rostral anterior cingulate cortex | -0.164                                                | 30.404                | 0.406          | 0.989              | 29                                            | 337                                              |
| Left temporal pole                     | -0.157                                                | 13.202                | 0.427          | 0.989              | 29                                            | 342                                              |
| Right precuneus                        | -0.142                                                | 85.667                | 0.473          | 0.989              | 29                                            | 342                                              |
| Right inferior temporal cortex gyrus   | -0.142                                                | 85.561                | 0.479          | 0.989              | 28                                            | 338                                              |
| Right inferior parietal cortex         | -0.141                                                | 125.461               | 0.477          | 0.989              | 29                                            | 334                                              |
| Left lateral orbitofrontal cortex      | -0.123                                                | 59.158                | 0.534          | 0.989              | 29                                            | 348                                              |
| Right middle temporal gyrus            | -0.121                                                | 74.389                | 0.546          | 0.989              | 28                                            | 334                                              |
| Right frontal pole                     | -0.120                                                | 8.583                 | 0.544          | 0.989              | 29                                            | 348                                              |
| Right caudal anterior cingulate cortex | -0.113                                                | 27.562                | 0.574          | 0.989              | 28                                            | 344                                              |
| Right posterior cingulate cortex       | -0.110                                                | 32.539                | 0.577          | 0.989              | 29                                            | 343                                              |
| Right surface area                     | -0.093                                                | 1070.146              | 0.636          | 1.000              | 29                                            | 349                                              |
| Right fusiform gyrus                   | -0.092                                                | 71.725                | 0.651          | 0.989              | 27                                            | 346                                              |
| Left parahippocampal gyrus             | -0.084                                                | 20.790                | 0.669          | 0.989              | 29                                            | 342                                              |
| Left cuneus                            | -0.081                                                | 39.173                | 0.686          | 0.989              | 28                                            | 346                                              |
| Left postcentral gyrus                 | -0.080                                                | 84.508                | 0.686          | 0.989              | 29                                            | 334                                              |

|                                       |        |          |       |       |    |     |
|---------------------------------------|--------|----------|-------|-------|----|-----|
| Right precentral gyrus                | -0.077 | 86.890   | 0.718 | 0.989 | 25 | 342 |
| Right paracentral lobule              | -0.077 | 42.398   | 0.696 | 0.989 | 29 | 345 |
| Right rostral middle frontal gyrus    | -0.073 | 129.894  | 0.711 | 0.989 | 29 | 346 |
| Right pars opercularis                | -0.066 | 44.093   | 0.751 | 0.989 | 26 | 345 |
| Left entorhinal cortex                | -0.044 | 16.736   | 0.835 | 0.989 | 25 | 322 |
| Right lateral orbitofrontal cortex    | -0.041 | 57.881   | 0.836 | 0.989 | 29 | 347 |
| Left pars orbitalis                   | -0.041 | 15.810   | 0.835 | 0.989 | 29 | 345 |
| Left banks superior temporal sulcus   | -0.029 | 33.344   | 0.885 | 0.989 | 28 | 313 |
| Right pericalcarine gyrus             | -0.026 | 45.875   | 0.896 | 0.989 | 29 | 344 |
| Left pars triangularis                | -0.024 | 39.146   | 0.908 | 0.989 | 26 | 348 |
| Right superior frontal gyrus          | -0.024 | 138.510  | 0.904 | 0.989 | 28 | 340 |
| Left caudal anterior cingulate cortex | -0.022 | 26.956   | 0.910 | 0.989 | 29 | 338 |
| Left precuneus                        | -0.021 | 82.017   | 0.917 | 0.989 | 29 | 345 |
| Right parahippocampal gyrus           | -0.016 | 21.348   | 0.936 | 0.989 | 29 | 340 |
| Right pars orbitalis                  | -0.016 | 19.461   | 0.935 | 0.989 | 28 | 347 |
| Left surface area                     | -0.008 | 1062.518 | 0.966 | 1.000 | 29 | 349 |
| Right pars triangularis               | -0.001 | 46.108   | 0.995 | 0.995 | 26 | 347 |
| Right insula                          | 0.005  | 46.103   | 0.982 | 0.995 | 27 | 338 |
| Right medial orbitofrontal cortex     | 0.010  | 38.374   | 0.960 | 0.989 | 28 | 340 |
| Left caudal middle frontal gyrus      | 0.011  | 68.156   | 0.954 | 0.989 | 29 | 347 |
| Left pericalcarine gyrus              | 0.013  | 46.083   | 0.950 | 0.989 | 27 | 346 |
| Right superior parietal cortex        | 0.014  | 116.114  | 0.945 | 0.989 | 28 | 345 |
| Left inferior temporal cortex gyrus   | 0.015  | 88.072   | 0.940 | 0.989 | 27 | 342 |
| Left lateral occipital cortex         | 0.028  | 100.401  | 0.888 | 0.989 | 28 | 345 |
| Left insula                           | 0.033  | 43.503   | 0.869 | 0.989 | 28 | 340 |
| Right banks superior temporal sulcus  | 0.035  | 27.507   | 0.861 | 0.989 | 28 | 327 |
| Right lateral occipital cortex        | 0.036  | 103.465  | 0.854 | 0.989 | 29 | 344 |
| Right caudal middle frontal gyrus     | 0.038  | 70.266   | 0.852 | 0.989 | 28 | 343 |
| Left frontal pole                     | 0.046  | 7.625    | 0.814 | 0.989 | 29 | 347 |

|                                         |       |         |       |       |    |     |
|-----------------------------------------|-------|---------|-------|-------|----|-----|
| Left rostral middle frontal gyrus       | 0.070 | 122.974 | 0.724 | 0.989 | 29 | 348 |
| Right cuneus                            | 0.075 | 40.687  | 0.713 | 0.989 | 27 | 345 |
| Left transverse temporal cortex         | 0.077 | 13.896  | 0.698 | 0.989 | 29 | 346 |
| Right temporal pole                     | 0.105 | 12.129  | 0.594 | 0.989 | 29 | 342 |
| Right rostral anterior cingulate cortex | 0.119 | 26.174  | 0.552 | 0.989 | 28 | 341 |
| Left supramarginal gyrus                | 0.119 | 102.219 | 0.554 | 0.989 | 28 | 327 |
| Left superior parietal cortex           | 0.119 | 118.895 | 0.546 | 0.989 | 29 | 345 |
| Right supramarginal gyrus               | 0.143 | 96.416  | 0.477 | 0.989 | 28 | 331 |
| Right lingual gyrus                     | 0.207 | 76.168  | 0.294 | 0.989 | 29 | 348 |
| Left posterior cingulate cortex         | 0.211 | 34.069  | 0.286 | 0.989 | 29 | 343 |
| Left middle temporal gyrus              | 0.219 | 71.131  | 0.284 | 0.989 | 27 | 334 |
| Left lingual gyrus                      | 0.242 | 78.642  | 0.229 | 0.989 | 28 | 346 |
| Left medial orbitofrontal cortex        | 0.262 | 45.331  | 0.186 | 0.989 | 29 | 342 |
| Right isthmus cingulate cortex          | 0.272 | 28.405  | 0.175 | 0.989 | 28 | 343 |
| Left isthmus cingulate cortex           | 0.289 | 31.791  | 0.144 | 0.989 | 29 | 343 |
| Left pars opercularis                   | 0.355 | 54.360  | 0.094 | 0.989 | 25 | 345 |

**TABLE S16a:** Full mega-analytic results for cortical thickness of each structure for the adult OCD patients with current comorbid anxiety compared with adult healthy controls, controlling for age, sex and scan centers.

|                                             | <b>Cohen's d<sup>a</sup><br/>(CurAnx vs HC)</b> | <b>Standard Error</b> | <b>P-value</b> | <b>FDR P-value</b> | <b>N controls</b> | <b>N patients</b> |
|---------------------------------------------|-------------------------------------------------|-----------------------|----------------|--------------------|-------------------|-------------------|
| <b>Right middle temporal gyrus</b>          | -0.214                                          | 0.012                 | 0.004          | 0.255              | 1402              | 217               |
| <b>Left medial orbitofrontal cortex</b>     | -0.162                                          | 0.013                 | 0.027          | 0.547              | 1430              | 220               |
| <b>Right rostral middle frontal gyrus</b>   | -0.155                                          | 0.010                 | 0.033          | 0.547              | 1424              | 223               |
| <b>Left superior frontal gyrus</b>          | -0.151                                          | 0.012                 | 0.046          | 0.547              | 1413              | 204               |
| <b>Right medial orbitofrontal cortex</b>    | -0.148                                          | 0.014                 | 0.042          | 0.547              | 1428              | 223               |
| <b>Left rostral middle frontal gyrus</b>    | -0.141                                          | 0.010                 | 0.053          | 0.547              | 1429              | 222               |
| <b>Left pars opercularis</b>                | -0.140                                          | 0.011                 | 0.055          | 0.547              | 1427              | 223               |
| <b>Left inferior parietal cortex</b>        | -0.130                                          | 0.010                 | 0.083          | 0.583              | 1364              | 208               |
| <b>Right pars opercularis</b>               | -0.129                                          | 0.012                 | 0.078          | 0.583              | 1418              | 220               |
| <b>Left middle temporal gyrus</b>           | -0.129                                          | 0.013                 | 0.096          | 0.614              | 1320              | 195               |
| <b>Left inferior temporal cortex gyrus</b>  | -0.114                                          | 0.012                 | 0.120          | 0.624              | 1383              | 221               |
| <b>Right caudal middle frontal gyrus</b>    | -0.110                                          | 0.012                 | 0.131          | 0.624              | 1423              | 222               |
| <b>Right inferior temporal cortex gyrus</b> | -0.106                                          | 0.012                 | 0.147          | 0.624              | 1400              | 222               |
| <b>Right lateral orbitofrontal cortex</b>   | -0.104                                          | 0.013                 | 0.152          | 0.624              | 1431              | 224               |
| <b>Right inferior parietal cortex</b>       | -0.090                                          | 0.010                 | 0.222          | 0.777              | 1379              | 215               |
| <b>Right superior frontal gyrus</b>         | -0.089                                          | 0.011                 | 0.227          | 0.777              | 1410              | 217               |
| <b>Left pars triangularis</b>               | -0.087                                          | 0.012                 | 0.233          | 0.777              | 1434              | 222               |
| <b>Left caudal middle frontal gyrus</b>     | -0.084                                          | 0.011                 | 0.254          | 0.785              | 1429              | 218               |
| <b>Right cortical thickness</b>             | -0.079                                          | 0.007                 | 0.277          | 0.785              | 1435              | 221               |
| <b>Left cortical thickness</b>              | -0.077                                          | 0.007                 | 0.291          | 0.785              | 1435              | 224               |
| <b>Left frontal pole</b>                    | -0.077                                          | 0.024                 | 0.289          | 0.785              | 1435              | 221               |
| <b>Right fusiform gyrus</b>                 | -0.072                                          | 0.011                 | 0.333          | 0.846              | 1428              | 210               |
| <b>Left entorhinal cortex</b>               | -0.070                                          | 0.030                 | 0.371          | 0.846              | 1318              | 193               |
| <b>Right pars triangularis</b>              | -0.065                                          | 0.012                 | 0.383          | 0.846              | 1423              | 210               |
| <b>Left pars orbitalis</b>                  | -0.054                                          | 0.017                 | 0.458          | 0.846              | 1431              | 220               |



|                                         |        |       |       |       |      |     |
|-----------------------------------------|--------|-------|-------|-------|------|-----|
| Left lateral orbitofrontal cortex       | -0.050 | 0.012 | 0.492 | 0.846 | 1433 | 222 |
| Left rostral anterior cingulate cortex  | -0.050 | 0.019 | 0.497 | 0.846 | 1415 | 217 |
| Right posterior cingulate cortex        | -0.050 | 0.012 | 0.491 | 0.846 | 1427 | 222 |
| Left lingual gyrus                      | -0.049 | 0.010 | 0.495 | 0.846 | 1427 | 224 |
| Left lateral occipital cortex           | -0.045 | 0.010 | 0.535 | 0.871 | 1419 | 222 |
| Left precuneus                          | -0.042 | 0.010 | 0.564 | 0.897 | 1426 | 224 |
| Right entorhinal cortex                 | -0.041 | 0.034 | 0.611 | 0.898 | 1244 | 177 |
| Right pars orbitalis                    | -0.038 | 0.017 | 0.598 | 0.898 | 1431 | 223 |
| Left insula                             | -0.033 | 0.013 | 0.653 | 0.898 | 1414 | 221 |
| Left posterior cingulate cortex         | -0.033 | 0.012 | 0.646 | 0.898 | 1431 | 224 |
| Left fusiform gyrus                     | -0.028 | 0.011 | 0.699 | 0.921 | 1428 | 223 |
| Left parahippocampal gyrus              | -0.026 | 0.023 | 0.717 | 0.921 | 1424 | 220 |
| Left isthmus cingulate cortex           | -0.022 | 0.015 | 0.767 | 0.921 | 1431 | 222 |
| Right precentral gyrus                  | -0.022 | 0.010 | 0.773 | 0.921 | 1405 | 209 |
| Left cuneus                             | -0.020 | 0.010 | 0.788 | 0.921 | 1404 | 223 |
| Left caudal anterior cingulate cortex   | -0.020 | 0.022 | 0.790 | 0.921 | 1415 | 217 |
| Right precuneus                         | -0.019 | 0.010 | 0.794 | 0.921 | 1429 | 223 |
| Right parahippocampal gyrus             | -0.017 | 0.020 | 0.816 | 0.921 | 1420 | 223 |
| Right isthmus cingulate cortex          | -0.017 | 0.015 | 0.814 | 0.921 | 1429 | 224 |
| Right temporal pole                     | -0.009 | 0.029 | 0.906 | 0.943 | 1430 | 210 |
| Left superior parietal cortex           | -0.009 | 0.009 | 0.898 | 0.943 | 1417 | 219 |
| Right frontal pole                      | -0.007 | 0.024 | 0.920 | 0.943 | 1434 | 223 |
| Right caudal anterior cingulate cortex  | 0.001  | 0.019 | 0.988 | 0.988 | 1422 | 218 |
| Right lateral occipital cortex          | 0.007  | 0.010 | 0.929 | 0.943 | 1421 | 220 |
| Right supramarginal gyrus               | 0.008  | 0.011 | 0.919 | 0.943 | 1321 | 192 |
| Right lingual gyrus                     | 0.013  | 0.010 | 0.859 | 0.943 | 1433 | 223 |
| Right rostral anterior cingulate cortex | 0.013  | 0.019 | 0.865 | 0.943 | 1413 | 217 |
| Left banks superior temporal sulcus     | 0.024  | 0.014 | 0.757 | 0.921 | 1284 | 193 |
| Left precentral gyrus                   | 0.026  | 0.010 | 0.722 | 0.921 | 1408 | 219 |

|                                             |       |       |       |       |      |     |
|---------------------------------------------|-------|-------|-------|-------|------|-----|
| <b>Right insula</b>                         | 0.033 | 0.013 | 0.654 | 0.898 | 1415 | 218 |
| <b>Left supramarginal gyrus</b>             | 0.039 | 0.011 | 0.618 | 0.898 | 1310 | 191 |
| <b>Right paracentral lobule</b>             | 0.040 | 0.011 | 0.578 | 0.898 | 1432 | 224 |
| <b>Right superior parietal cortex</b>       | 0.049 | 0.010 | 0.508 | 0.846 | 1411 | 215 |
| <b>Right cuneus</b>                         | 0.050 | 0.011 | 0.493 | 0.846 | 1401 | 219 |
| <b>Left temporal pole</b>                   | 0.058 | 0.027 | 0.424 | 0.846 | 1435 | 223 |
| <b>Right pericalcarine gyrus</b>            | 0.060 | 0.010 | 0.410 | 0.846 | 1409 | 222 |
| <b>Right banks superior temporal sulcus</b> | 0.061 | 0.014 | 0.430 | 0.846 | 1321 | 193 |
| <b>Left superior temporal gyrus</b>         | 0.062 | 0.013 | 0.425 | 0.846 | 1296 | 195 |
| <b>Right transverse temporal cortex</b>     | 0.062 | 0.017 | 0.397 | 0.846 | 1434 | 223 |
| <b>Left paracentral lobule</b>              | 0.070 | 0.011 | 0.339 | 0.846 | 1430 | 223 |
| <b>Left postcentral gyrus</b>               | 0.080 | 0.009 | 0.279 | 0.785 | 1403 | 215 |
| <b>Left pericalcarine gyrus</b>             | 0.095 | 0.010 | 0.196 | 0.760 | 1406 | 221 |
| <b>Left transverse temporal cortex</b>      | 0.106 | 0.016 | 0.147 | 0.624 | 1433 | 222 |
| <b>Right postcentral gyrus</b>              | 0.114 | 0.009 | 0.122 | 0.624 | 1414 | 214 |
| <b>Right superior temporal gyrus</b>        | 0.137 | 0.013 | 0.076 | 0.583 | 1316 | 197 |

**TABLE S16b:** Full mega-analytic results for cortical thickness of each structure for the adult OCD patients with no current comorbid anxiety compared with adult healthy controls, controlling for age, sex and scan center.

|                                     | <b>Cohen's d<sup>a</sup><br/>(NoCurAnx vs HC)</b> | <b>Standard Error</b> | <b>P-value</b> | <b>FDR P-value</b> | <b>N controls</b> | <b>N patients</b> |
|-------------------------------------|---------------------------------------------------|-----------------------|----------------|--------------------|-------------------|-------------------|
| Left inferior parietal cortex       | -0.160                                            | 0.006                 | <0.001         | 0.004              | 1364              | 1076              |
| Right inferior parietal cortex      | -0.155                                            | 0.006                 | <0.001         | 0.004              | 1379              | 1081              |
| Left fusiform gyrus                 | -0.151                                            | 0.006                 | <0.001         | 0.004              | 1428              | 1105              |
| Left precuneus                      | -0.128                                            | 0.006                 | 0.002          | 0.021              | 1426              | 1108              |
| Left cortical thickness             | -0.128                                            | 0.004                 | 0.001          | 0.021              | 1435              | 1113              |
| Left lateral orbitofrontal cortex   | -0.124                                            | 0.007                 | 0.002          | 0.021              | 1433              | 1111              |
| Right parahippocampal gyrus         | -0.124                                            | 0.011                 | 0.002          | 0.021              | 1420              | 1105              |
| Right precuneus                     | -0.120                                            | 0.006                 | 0.003          | 0.025              | 1429              | 1107              |
| Right fusiform gyrus                | -0.115                                            | 0.006                 | 0.005          | 0.034              | 1428              | 1090              |
| Left middle temporal gyrus          | -0.114                                            | 0.007                 | 0.007          | 0.036              | 1320              | 1021              |
| Right lateral orbitofrontal cortex  | -0.113                                            | 0.007                 | 0.005          | 0.034              | 1431              | 1112              |
| Right medial orbitofrontal cortex   | -0.111                                            | 0.008                 | 0.006          | 0.035              | 1428              | 1103              |
| Right cortical thickness            | -0.110                                            | 0.004                 | 0.006          | 0.035              | 1435              | 1111              |
| Right middle temporal gyrus         | -0.104                                            | 0.007                 | 0.011          | 0.053              | 1402              | 1092              |
| Left parahippocampal gyrus          | -0.098                                            | 0.013                 | 0.015          | 0.070              | 1424              | 1108              |
| Left inferior temporal cortex gyrus | -0.095                                            | 0.007                 | 0.020          | 0.083              | 1383              | 1088              |
| Right lateral occipital cortex      | -0.093                                            | 0.006                 | 0.021          | 0.083              | 1421              | 1098              |
| Right insula                        | -0.092                                            | 0.008                 | 0.024          | 0.083              | 1415              | 1086              |
| Left posterior cingulate cortex     | -0.091                                            | 0.007                 | 0.024          | 0.083              | 1431              | 1108              |
| Right isthmus cingulate cortex      | -0.091                                            | 0.008                 | 0.024          | 0.083              | 1429              | 1111              |
| Left superior parietal cortex       | -0.090                                            | 0.005                 | 0.027          | 0.089              | 1417              | 1090              |
| Left caudal middle frontal gyrus    | -0.087                                            | 0.006                 | 0.032          | 0.094              | 1429              | 1100              |
| Left insula                         | -0.087                                            | 0.007                 | 0.031          | 0.094              | 1414              | 1091              |
| Left pars orbitalis                 | -0.086                                            | 0.009                 | 0.033          | 0.094              | 1431              | 1108              |
| Left entorhinal cortex              | -0.086                                            | 0.016                 | 0.040          | 0.094              | 1318              | 1032              |

|                                        |        |       |       |       |      |      |
|----------------------------------------|--------|-------|-------|-------|------|------|
| Left supramarginal gyrus               | -0.086 | 0.006 | 0.039 | 0.094 | 1310 | 1029 |
| Right pars orbitalis                   | -0.085 | 0.009 | 0.036 | 0.094 | 1431 | 1111 |
| Left pars opercularis                  | -0.085 | 0.006 | 0.036 | 0.094 | 1427 | 1106 |
| Left lateral occipital cortex          | -0.084 | 0.006 | 0.037 | 0.094 | 1419 | 1097 |
| Left rostral middle frontal gyrus      | -0.083 | 0.006 | 0.039 | 0.094 | 1429 | 1102 |
| Left banks superior temporal sulcus    | -0.074 | 0.008 | 0.080 | 0.154 | 1284 | 1018 |
| Left isthmus cingulate cortex          | -0.072 | 0.008 | 0.075 | 0.154 | 1431 | 1109 |
| Right superior parietal cortex         | -0.072 | 0.005 | 0.077 | 0.154 | 1411 | 1093 |
| Right posterior cingulate cortex       | -0.071 | 0.007 | 0.079 | 0.154 | 1427 | 1111 |
| Left cuneus                            | -0.071 | 0.006 | 0.082 | 0.154 | 1404 | 1082 |
| Right caudal middle frontal gyrus      | -0.071 | 0.007 | 0.079 | 0.154 | 1423 | 1103 |
| Right rostral middle frontal gyrus     | -0.071 | 0.006 | 0.077 | 0.154 | 1424 | 1109 |
| Right pars triangularis                | -0.068 | 0.007 | 0.093 | 0.170 | 1423 | 1092 |
| Left medial orbitofrontal cortex       | -0.065 | 0.007 | 0.108 | 0.190 | 1430 | 1109 |
| Left rostral anterior cingulate cortex | -0.065 | 0.010 | 0.108 | 0.190 | 1415 | 1095 |
| Left superior frontal gyrus            | -0.063 | 0.006 | 0.124 | 0.211 | 1413 | 1074 |
| Right pars opercularis                 | -0.059 | 0.007 | 0.147 | 0.243 | 1418 | 1099 |
| Right inferior temporal cortex gyrus   | -0.058 | 0.007 | 0.149 | 0.243 | 1400 | 1105 |
| Right cuneus                           | -0.057 | 0.006 | 0.162 | 0.258 | 1401 | 1085 |
| Right lingual gyrus                    | -0.053 | 0.005 | 0.186 | 0.289 | 1433 | 1108 |
| Left frontal pole                      | -0.052 | 0.013 | 0.199 | 0.297 | 1435 | 1108 |
| Right caudal anterior cingulate cortex | -0.052 | 0.010 | 0.197 | 0.297 | 1422 | 1107 |
| Right precentral gyrus                 | -0.050 | 0.006 | 0.216 | 0.315 | 1405 | 1088 |
| Left lingual gyrus                     | -0.049 | 0.005 | 0.226 | 0.323 | 1427 | 1105 |
| Left paracentral lobule                | -0.048 | 0.006 | 0.232 | 0.324 | 1430 | 1106 |
| Right transverse temporal cortex       | -0.047 | 0.009 | 0.242 | 0.333 | 1434 | 1112 |
| Left precentral gyrus                  | -0.043 | 0.006 | 0.285 | 0.384 | 1408 | 1094 |
| Left transverse temporal cortex        | -0.042 | 0.009 | 0.292 | 0.386 | 1433 | 1110 |
| Left superior temporal gyrus           | -0.037 | 0.007 | 0.381 | 0.482 | 1296 | 999  |

|                                                |        |       |       |       |      |      |
|------------------------------------------------|--------|-------|-------|-------|------|------|
| <b>Right superior temporal gyrus</b>           | -0.036 | 0.007 | 0.396 | 0.482 | 1316 | 1033 |
| <b>Right superior frontal gyrus</b>            | -0.034 | 0.006 | 0.399 | 0.482 | 1410 | 1103 |
| <b>Left postcentral gyrus</b>                  | -0.034 | 0.005 | 0.396 | 0.482 | 1403 | 1091 |
| <b>Left pars triangularis</b>                  | -0.029 | 0.007 | 0.472 | 0.551 | 1434 | 1108 |
| <b>Right supramarginal gyrus</b>               | -0.027 | 0.006 | 0.515 | 0.591 | 1321 | 1044 |
| <b>Right banks superior temporal sulcus</b>    | -0.022 | 0.007 | 0.596 | 0.673 | 1321 | 1041 |
| <b>Right entorhinal cortex</b>                 | -0.016 | 0.017 | 0.699 | 0.777 | 1244 | 1011 |
| <b>Right paracentral lobule</b>                | -0.012 | 0.006 | 0.769 | 0.841 | 1432 | 1108 |
| <b>Left caudal anterior cingulate cortex</b>   | -0.006 | 0.012 | 0.876 | 0.914 | 1415 | 1096 |
| <b>Left pericalcarine gyrus</b>                | -0.005 | 0.005 | 0.901 | 0.914 | 1406 | 1100 |
| <b>Right rostral anterior cingulate cortex</b> | -0.005 | 0.010 | 0.894 | 0.914 | 1413 | 1100 |
| <b>Right temporal pole</b>                     | 0.001  | 0.016 | 0.977 | 0.977 | 1430 | 1092 |
| <b>Left temporal pole</b>                      | 0.007  | 0.015 | 0.868 | 0.914 | 1435 | 1109 |
| <b>Right pericalcarine gyrus</b>               | 0.009  | 0.006 | 0.818 | 0.881 | 1409 | 1094 |
| <b>Right postcentral gyrus</b>                 | 0.031  | 0.005 | 0.438 | 0.520 | 1414 | 1099 |
| <b>Right frontal pole</b>                      | 0.041  | 0.013 | 0.311 | 0.403 | 1434 | 1111 |

**TABLE S16c:** Full mega-analytic results for cortical thickness of each structure for the adult OCD patients with comorbid current anxiety compared with adult patients without, controlling for age, sex and scan center.

|                                        | <b>Cohen's d<sup>a</sup><br/>(NoCurAnx vs CurAnx)</b> | <b>Standard Error</b> | <b>P-value</b> | <b>FDR P-value</b> | <b>N patients with<br/>current anxiety</b> | <b>N patients with no<br/>current anxiety</b> |
|----------------------------------------|-------------------------------------------------------|-----------------------|----------------|--------------------|--------------------------------------------|-----------------------------------------------|
| Left superior frontal gyrus            | -0.200                                                | 0.013                 | 0.010          | 0.668              | 204                                        | 1074                                          |
| Right rostral middle frontal gyrus     | -0.141                                                | 0.011                 | 0.057          | 0.987              | 223                                        | 1109                                          |
| Right superior frontal gyrus           | -0.134                                                | 0.012                 | 0.074          | 0.987              | 217                                        | 1103                                          |
| Right frontal pole                     | -0.117                                                | 0.025                 | 0.114          | 0.987              | 223                                        | 1111                                          |
| Left rostral middle frontal gyrus      | -0.107                                                | 0.011                 | 0.152          | 0.987              | 222                                        | 1102                                          |
| Left caudal middle frontal gyrus       | -0.107                                                | 0.013                 | 0.154          | 0.987              | 218                                        | 1100                                          |
| Left frontal pole                      | -0.104                                                | 0.025                 | 0.162          | 0.987              | 221                                        | 1108                                          |
| Left medial orbitofrontal cortex       | -0.100                                                | 0.015                 | 0.180          | 0.987              | 220                                        | 1109                                          |
| Right middle temporal gyrus            | -0.094                                                | 0.013                 | 0.210          | 0.987              | 217                                        | 1092                                          |
| Right supramarginal gyrus              | -0.089                                                | 0.013                 | 0.263          | 0.987              | 192                                        | 1044                                          |
| Right entorhinal cortex                | -0.085                                                | 0.036                 | 0.305          | 0.987              | 177                                        | 1011                                          |
| Left lingual gyrus                     | -0.083                                                | 0.011                 | 0.260          | 0.987              | 224                                        | 1105                                          |
| Right caudal middle frontal gyrus      | -0.082                                                | 0.013                 | 0.272          | 0.987              | 222                                        | 1103                                          |
| Right pars opercularis                 | -0.076                                                | 0.013                 | 0.309          | 0.987              | 220                                        | 1099                                          |
| Left inferior parietal cortex          | -0.065                                                | 0.012                 | 0.397          | 0.987              | 208                                        | 1076                                          |
| Left pars opercularis                  | -0.060                                                | 0.012                 | 0.419          | 0.987              | 223                                        | 1106                                          |
| Left rostral anterior cingulate cortex | -0.055                                                | 0.021                 | 0.466          | 0.987              | 217                                        | 1095                                          |
| Left pars triangularis                 | -0.049                                                | 0.014                 | 0.508          | 0.987              | 222                                        | 1108                                          |
| Right medial orbitofrontal cortex      | -0.040                                                | 0.015                 | 0.592          | 0.987              | 223                                        | 1103                                          |
| Right lateral orbitofrontal cortex     | -0.038                                                | 0.014                 | 0.607          | 0.987              | 224                                        | 1112                                          |
| Right inferior temporal cortex gyrus   | -0.036                                                | 0.014                 | 0.627          | 0.987              | 222                                        | 1105                                          |
| Left cortical thickness                | -0.036                                                | 0.008                 | 0.623          | 0.987              | 224                                        | 1113                                          |
| Left superior parietal cortex          | -0.035                                                | 0.010                 | 0.638          | 0.987              | 219                                        | 1090                                          |
| Right cortical thickness               | -0.034                                                | 0.008                 | 0.651          | 0.987              | 221                                        | 1111                                          |
| Right precentral gyrus                 | -0.028                                                | 0.012                 | 0.711          | 0.987              | 209                                        | 1088                                          |

|                                         |        |       |       |       |     |      |
|-----------------------------------------|--------|-------|-------|-------|-----|------|
| Left caudal anterior cingulate cortex   | -0.027 | 0.024 | 0.718 | 0.987 | 217 | 1096 |
| Right inferior parietal cortex          | -0.026 | 0.011 | 0.734 | 0.987 | 215 | 1081 |
| Right caudal anterior cingulate cortex  | -0.024 | 0.021 | 0.753 | 0.987 | 218 | 1107 |
| Right lateral occipital cortex          | -0.024 | 0.012 | 0.750 | 0.987 | 220 | 1098 |
| Left lateral occipital cortex           | -0.021 | 0.011 | 0.783 | 0.987 | 222 | 1097 |
| Left insula                             | -0.013 | 0.014 | 0.858 | 0.987 | 221 | 1091 |
| Right pars orbitalis                    | -0.011 | 0.018 | 0.883 | 0.987 | 223 | 1111 |
| Right lingual gyrus                     | -0.011 | 0.011 | 0.882 | 0.987 | 223 | 1108 |
| Left precuneus                          | -0.009 | 0.011 | 0.908 | 0.987 | 224 | 1108 |
| Right pericalcarine gyrus               | -0.007 | 0.011 | 0.930 | 0.987 | 222 | 1094 |
| Left pars orbitalis                     | -0.002 | 0.018 | 0.982 | 0.987 | 220 | 1108 |
| Left isthmus cingulate cortex           | -0.002 | 0.017 | 0.974 | 0.987 | 222 | 1109 |
| Left entorhinal cortex                  | 0.001  | 0.033 | 0.987 | 0.987 | 193 | 1032 |
| Left inferior temporal cortex gyrus     | 0.002  | 0.014 | 0.977 | 0.987 | 221 | 1088 |
| Right posterior cingulate cortex        | 0.004  | 0.014 | 0.956 | 0.987 | 222 | 1111 |
| Right isthmus cingulate cortex          | 0.005  | 0.017 | 0.942 | 0.987 | 224 | 1111 |
| Right rostral anterior cingulate cortex | 0.007  | 0.021 | 0.923 | 0.987 | 217 | 1100 |
| Right temporal pole                     | 0.010  | 0.033 | 0.900 | 0.987 | 210 | 1092 |
| Left lateral orbitofrontal cortex       | 0.017  | 0.014 | 0.824 | 0.987 | 222 | 1111 |
| Left precentral gyrus                   | 0.018  | 0.011 | 0.809 | 0.987 | 219 | 1094 |
| Right banks superior temporal sulcus    | 0.019  | 0.015 | 0.806 | 0.987 | 193 | 1041 |
| Left posterior cingulate cortex         | 0.019  | 0.014 | 0.794 | 0.987 | 224 | 1108 |
| Right transverse temporal cortex        | 0.019  | 0.018 | 0.795 | 0.987 | 223 | 1112 |
| Right pars triangularis                 | 0.021  | 0.013 | 0.779 | 0.987 | 210 | 1092 |
| Right postcentral gyrus                 | 0.025  | 0.010 | 0.743 | 0.987 | 214 | 1099 |
| Right superior parietal cortex          | 0.026  | 0.010 | 0.731 | 0.987 | 215 | 1093 |
| Right paracentral lobule                | 0.027  | 0.013 | 0.711 | 0.987 | 224 | 1108 |
| Left middle temporal gyrus              | 0.032  | 0.014 | 0.684 | 0.987 | 195 | 1021 |
| Left cuneus                             | 0.037  | 0.011 | 0.619 | 0.987 | 223 | 1082 |

|                                            |       |       |       |       |     |      |
|--------------------------------------------|-------|-------|-------|-------|-----|------|
| <b>Left pericalcarine gyrus</b>            | 0.040 | 0.011 | 0.592 | 0.987 | 221 | 1100 |
| <b>Left postcentral gyrus</b>              | 0.042 | 0.010 | 0.581 | 0.987 | 215 | 1091 |
| <b>Left parahippocampal gyrus</b>          | 0.043 | 0.026 | 0.561 | 0.987 | 220 | 1108 |
| <b>Left transverse temporal cortex</b>     | 0.043 | 0.018 | 0.566 | 0.987 | 222 | 1110 |
| <b>Left supramarginal gyrus</b>            | 0.043 | 0.013 | 0.593 | 0.987 | 191 | 1029 |
| <b>Right precuneus</b>                     | 0.044 | 0.011 | 0.551 | 0.987 | 223 | 1107 |
| <b>Right cuneus</b>                        | 0.047 | 0.012 | 0.529 | 0.987 | 219 | 1085 |
| <b>Left temporal pole</b>                  | 0.051 | 0.030 | 0.490 | 0.987 | 223 | 1109 |
| <b>Left superior temporal gyrus</b>        | 0.059 | 0.014 | 0.453 | 0.987 | 195 | 999  |
| <b>Right fusiform gyrus</b>                | 0.062 | 0.012 | 0.416 | 0.987 | 210 | 1090 |
| <b>Left paracentral lobule</b>             | 0.078 | 0.013 | 0.295 | 0.987 | 223 | 1106 |
| <b>Left fusiform gyrus</b>                 | 0.080 | 0.012 | 0.281 | 0.987 | 223 | 1105 |
| <b>Left banks superior temporal sulcus</b> | 0.096 | 0.015 | 0.226 | 0.987 | 193 | 1018 |
| <b>Right parahippocampal gyrus</b>         | 0.100 | 0.021 | 0.176 | 0.987 | 223 | 1105 |
| <b>Right insula</b>                        | 0.110 | 0.015 | 0.143 | 0.987 | 218 | 1086 |
| <b>Right superior temporal gyrus</b>       | 0.115 | 0.014 | 0.142 | 0.987 | 197 | 1033 |



**TABLE S17a:** Full mega-analytic results for surface area of each structure for the adult OCD patients with current comorbid anxiety compared with adult healthy controls, controlling for age, sex, scan center and ICV.

|                                         | <b>Cohen's d<sup>a</sup><br/>(CurAnx vs HC)</b> | <b>Standard Error</b> | <b>P-value</b> | <b>FDR P-value</b> | <b>N controls</b> | <b>N patients</b> |
|-----------------------------------------|-------------------------------------------------|-----------------------|----------------|--------------------|-------------------|-------------------|
| Left transverse temporal cortex         | -0.220                                          | 5.501                 | 0.003          | 0.171              | 1431              | 222               |
| Left posterior cingulate cortex         | -0.147                                          | 11.469                | 0.043          | 0.591              | 1429              | 224               |
| Left pars opercularis                   | -0.126                                          | 18.819                | 0.083          | 0.607              | 1425              | 223               |
| Right superior temporal gyrus           | -0.126                                          | 23.734                | 0.102          | 0.607              | 1314              | 197               |
| Right middle temporal gyrus             | -0.110                                          | 24.604                | 0.134          | 0.607              | 1401              | 217               |
| Left superior parietal cortex           | -0.100                                          | 39.970                | 0.172          | 0.714              | 1415              | 219               |
| Left supramarginal gyrus                | -0.094                                          | 36.149                | 0.229          | 0.779              | 1308              | 191               |
| Right postcentral gyrus                 | -0.092                                          | 29.034                | 0.214          | 0.779              | 1412              | 214               |
| Right superior frontal gyrus            | -0.079                                          | 44.541                | 0.286          | 0.812              | 1408              | 217               |
| Right superior parietal cortex          | -0.079                                          | 39.264                | 0.284          | 0.812              | 1409              | 215               |
| Left pars triangularis                  | -0.078                                          | 13.286                | 0.284          | 0.812              | 1432              | 222               |
| Left caudal middle frontal gyrus        | -0.074                                          | 24.386                | 0.313          | 0.818              | 1427              | 218               |
| Left superior temporal gyrus            | -0.066                                          | 28.006                | 0.398          | 0.889              | 1294              | 195               |
| Left superior frontal gyrus             | -0.060                                          | 44.121                | 0.428          | 0.889              | 1411              | 204               |
| Left lateral orbitofrontal cortex       | -0.059                                          | 17.441                | 0.414          | 0.889              | 1431              | 222               |
| Left postcentral gyrus                  | -0.056                                          | 29.710                | 0.448          | 0.889              | 1401              | 215               |
| Right caudal anterior cingulate cortex  | -0.052                                          | 11.050                | 0.482          | 0.889              | 1420              | 218               |
| Right supramarginal gyrus               | -0.051                                          | 34.016                | 0.516          | 0.889              | 1319              | 192               |
| Left insula                             | -0.045                                          | 14.803                | 0.534          | 0.889              | 1412              | 221               |
| Right rostral anterior cingulate cortex | -0.042                                          | 9.092                 | 0.568          | 0.889              | 1411              | 217               |
| Right precentral gyrus                  | -0.042                                          | 34.125                | 0.570          | 0.889              | 1403              | 209               |
| Right posterior cingulate cortex        | -0.040                                          | 12.053                | 0.583          | 0.889              | 1425              | 222               |
| Left paracentral lobule                 | -0.039                                          | 12.310                | 0.589          | 0.889              | 1428              | 223               |
| Right transverse temporal cortex        | -0.036                                          | 4.001                 | 0.625          | 0.889              | 1432              | 223               |
| Right precuneus                         | -0.036                                          | 28.968                | 0.625          | 0.889              | 1427              | 223               |

|                                        |        |         |       |       |      |     |
|----------------------------------------|--------|---------|-------|-------|------|-----|
| Right frontal pole                     | -0.034 | 3.149   | 0.642 | 0.889 | 1432 | 223 |
| Left medial orbitofrontal cortex       | -0.032 | 15.442  | 0.662 | 0.889 | 1428 | 220 |
| Left frontal pole                      | -0.029 | 2.504   | 0.687 | 0.889 | 1433 | 221 |
| Right pars triangularis                | -0.029 | 16.575  | 0.693 | 0.889 | 1421 | 210 |
| Left lingual gyrus                     | -0.023 | 27.068  | 0.755 | 0.920 | 1425 | 224 |
| Left surface area                      | -0.023 | 346.870 | 0.747 | 1.000 | 1433 | 224 |
| Right pars opercularis                 | -0.018 | 15.699  | 0.801 | 0.927 | 1416 | 220 |
| Right isthmus cingulate cortex         | -0.015 | 9.844   | 0.838 | 0.928 | 1427 | 224 |
| Left isthmus cingulate cortex          | -0.013 | 11.138  | 0.860 | 0.928 | 1429 | 222 |
| Left cuneus                            | -0.009 | 13.646  | 0.903 | 0.931 | 1402 | 223 |
| Right insula                           | 0.003  | 16.485  | 0.963 | 0.963 | 1413 | 218 |
| Right paracentral lobule               | 0.004  | 14.198  | 0.951 | 0.963 | 1430 | 224 |
| Right temporal pole                    | 0.010  | 4.660   | 0.893 | 0.931 | 1428 | 210 |
| Left rostral anterior cingulate cortex | 0.011  | 10.104  | 0.876 | 0.931 | 1413 | 217 |
| Right surface area                     | 0.011  | 351.601 | 0.884 | 1.000 | 1434 | 223 |
| Right lateral occipital cortex         | 0.014  | 36.973  | 0.846 | 0.928 | 1419 | 220 |
| Right inferior temporal cortex gyrus   | 0.017  | 27.648  | 0.819 | 0.928 | 1399 | 222 |
| Left pericalcarine gyrus               | 0.018  | 15.352  | 0.804 | 0.927 | 1404 | 221 |
| Right cuneus                           | 0.020  | 13.248  | 0.785 | 0.927 | 1399 | 219 |
| Left fusiform gyrus                    | 0.022  | 26.086  | 0.757 | 0.920 | 1426 | 223 |
| Left caudal anterior cingulate cortex  | 0.024  | 9.276   | 0.747 | 0.920 | 1413 | 217 |
| Right pericalcarine gyrus              | 0.030  | 16.583  | 0.682 | 0.889 | 1407 | 222 |
| Right caudal middle frontal gyrus      | 0.032  | 24.686  | 0.663 | 0.889 | 1421 | 222 |
| Left precentral gyrus                  | 0.035  | 30.024  | 0.636 | 0.889 | 1406 | 219 |
| Right fusiform gyrus                   | 0.039  | 25.998  | 0.602 | 0.889 | 1426 | 210 |
| Left inferior parietal cortex          | 0.044  | 39.291  | 0.556 | 0.889 | 1363 | 208 |
| Left lateral occipital cortex          | 0.046  | 35.493  | 0.524 | 0.889 | 1417 | 222 |
| Right entorhinal cortex                | 0.049  | 11.587  | 0.550 | 0.889 | 1242 | 177 |
| Left entorhinal cortex                 | 0.056  | 5.881   | 0.469 | 0.889 | 1316 | 193 |

|                                      |       |        |       |       |      |     |
|--------------------------------------|-------|--------|-------|-------|------|-----|
| Left inferior temporal cortex gyrus  | 0.061 | 29.326 | 0.402 | 0.889 | 1382 | 221 |
| Left temporal pole                   | 0.061 | 4.399  | 0.404 | 0.889 | 1434 | 223 |
| Left rostral middle frontal gyrus    | 0.074 | 42.782 | 0.309 | 0.818 | 1427 | 222 |
| Right inferior parietal cortex       | 0.083 | 43.757 | 0.263 | 0.812 | 1377 | 215 |
| Right lingual gyrus                  | 0.090 | 25.318 | 0.218 | 0.779 | 1431 | 223 |
| Right banks superior temporal sulcus | 0.105 | 10.163 | 0.178 | 0.714 | 1319 | 193 |
| Right lateral orbitofrontal cortex   | 0.112 | 18.843 | 0.123 | 0.607 | 1429 | 224 |
| Left pars orbitalis                  | 0.112 | 5.459  | 0.127 | 0.607 | 1429 | 220 |
| Left precuneus                       | 0.116 | 26.347 | 0.109 | 0.607 | 1424 | 224 |
| Left middle temporal gyrus           | 0.117 | 24.888 | 0.130 | 0.607 | 1319 | 195 |
| Right pars orbitalis                 | 0.117 | 6.715  | 0.107 | 0.607 | 1429 | 223 |
| Right parahippocampal gyrus          | 0.118 | 6.935  | 0.106 | 0.607 | 1418 | 223 |
| Left parahippocampal gyrus           | 0.120 | 7.267  | 0.100 | 0.607 | 1422 | 220 |
| Right medial orbitofrontal cortex    | 0.149 | 12.514 | 0.041 | 0.591 | 1426 | 223 |
| Right rostral middle frontal gyrus   | 0.153 | 43.823 | 0.035 | 0.591 | 1422 | 223 |
| Left banks superior temporal sulcus  | 0.189 | 11.820 | 0.016 | 0.533 | 1282 | 193 |

**TABLE S17b:** Full mega-analytic results for surface area of each structure for the adult OCD patients with no current comorbid anxiety compared with adult healthy controls, controlling for age, sex, scan center and ICV.

|                                                | <b>Cohen's d<sup>a</sup><br/>(NoCurAnx vs HC)</b> | <b>Standard Error</b> | <b>P-value</b> | <b>FDR P-value</b> | <b>N controls</b> | <b>N patients</b> |
|------------------------------------------------|---------------------------------------------------|-----------------------|----------------|--------------------|-------------------|-------------------|
| <b>Left transverse temporal cortex</b>         | -0.149                                            | 2.914                 | <0.001         | 0.015              | 1431              | 1109              |
| <b>Right transverse temporal cortex</b>        | -0.112                                            | 2.172                 | 0.005          | 0.182              | 1432              | 1111              |
| <b>Right superior temporal gyrus</b>           | -0.107                                            | 12.571                | 0.011          | 0.241              | 1314              | 1032              |
| <b>Left pars triangularis</b>                  | -0.090                                            | 7.161                 | 0.025          | 0.428              | 1432              | 1107              |
| <b>Left superior frontal gyrus</b>             | -0.079                                            | 23.520                | 0.053          | 0.552              | 1411              | 1073              |
| <b>Left postcentral gyrus</b>                  | -0.078                                            | 16.252                | 0.056          | 0.552              | 1401              | 1090              |
| <b>Right posterior cingulate cortex</b>        | -0.076                                            | 6.507                 | 0.060          | 0.552              | 1425              | 1110              |
| <b>Right rostral anterior cingulate cortex</b> | -0.075                                            | 4.930                 | 0.065          | 0.552              | 1411              | 1100              |
| <b>Left surface area</b>                       | -0.070                                            | 186.881               | 0.083          | 1.000              | 1433              | 1112              |
| <b>Left lateral occipital cortex</b>           | -0.070                                            | 19.320                | 0.085          | 0.563              | 1417              | 1096              |
| <b>Right supramarginal gyrus</b>               | -0.070                                            | 17.854                | 0.094          | 0.563              | 1319              | 1043              |
| <b>Right pericalcarine gyrus</b>               | -0.066                                            | 8.953                 | 0.106          | 0.563              | 1407              | 1093              |
| <b>Left pars opercularis</b>                   | -0.066                                            | 10.172                | 0.103          | 0.563              | 1425              | 1105              |
| <b>Right superior frontal gyrus</b>            | -0.065                                            | 23.882                | 0.108          | 0.563              | 1408              | 1102              |
| <b>Left superior temporal gyrus</b>            | -0.064                                            | 14.639                | 0.129          | 0.584              | 1294              | 998               |
| <b>Left lateral orbitofrontal cortex</b>       | -0.062                                            | 9.482                 | 0.121          | 0.584              | 1431              | 1110              |
| <b>Left cuneus</b>                             | -0.060                                            | 7.473                 | 0.144          | 0.590              | 1402              | 1081              |
| <b>Left pars orbitalis</b>                     | -0.058                                            | 2.958                 | 0.148          | 0.590              | 1429              | 1107              |
| <b>Right caudal anterior cingulate cortex</b>  | -0.055                                            | 5.835                 | 0.171          | 0.646              | 1420              | 1106              |
| <b>Right pars opercularis</b>                  | -0.053                                            | 8.607                 | 0.194          | 0.693              | 1416              | 1099              |
| <b>Right surface area</b>                      | -0.052                                            | 188.974               | 0.199          | 1.000              | 1434              | 1111              |
| <b>Left inferior temporal cortex gyrus</b>     | -0.050                                            | 15.953                | 0.225          | 0.764              | 1382              | 1087              |
| <b>Right lateral occipital cortex</b>          | -0.046                                            | 19.721                | 0.251          | 0.797              | 1419              | 1097              |
| <b>Left insula</b>                             | -0.045                                            | 8.072                 | 0.272          | 0.805              | 1412              | 1090              |
| <b>Right cuneus</b>                            | -0.041                                            | 7.443                 | 0.313          | 0.823              | 1399              | 1084              |

|                                        |        |        |       |       |      |      |
|----------------------------------------|--------|--------|-------|-------|------|------|
| Right isthmus cingulate cortex         | -0.040 | 5.506  | 0.319 | 0.823 | 1427 | 1110 |
| Left supramarginal gyrus               | -0.039 | 19.110 | 0.351 | 0.823 | 1308 | 1028 |
| Left pericalcarine gyrus               | -0.038 | 8.394  | 0.350 | 0.823 | 1404 | 1099 |
| Left superior parietal cortex          | -0.036 | 21.497 | 0.375 | 0.823 | 1415 | 1089 |
| Left frontal pole                      | -0.032 | 1.364  | 0.428 | 0.878 | 1433 | 1107 |
| Left isthmus cingulate cortex          | -0.031 | 6.131  | 0.444 | 0.878 | 1429 | 1108 |
| Left caudal middle frontal gyrus       | -0.030 | 13.190 | 0.453 | 0.878 | 1427 | 1099 |
| Right precuneus                        | -0.029 | 15.931 | 0.467 | 0.878 | 1427 | 1106 |
| Right lateral orbitofrontal cortex     | -0.028 | 10.325 | 0.490 | 0.878 | 1429 | 1111 |
| Right insula                           | -0.028 | 8.916  | 0.484 | 0.878 | 1413 | 1085 |
| Left entorhinal cortex                 | -0.025 | 3.150  | 0.554 | 0.906 | 1316 | 1032 |
| Right superior parietal cortex         | -0.024 | 21.278 | 0.559 | 0.906 | 1409 | 1092 |
| Left lingual gyrus                     | -0.021 | 14.842 | 0.600 | 0.927 | 1425 | 1104 |
| Right pars orbitalis                   | -0.020 | 3.669  | 0.614 | 0.927 | 1429 | 1110 |
| Left temporal pole                     | -0.019 | 2.393  | 0.646 | 0.927 | 1434 | 1108 |
| Right rostral middle frontal gyrus     | -0.017 | 23.340 | 0.681 | 0.927 | 1422 | 1108 |
| Right pars triangularis                | -0.017 | 9.100  | 0.680 | 0.927 | 1421 | 1091 |
| Left medial orbitofrontal cortex       | -0.016 | 8.329  | 0.695 | 0.927 | 1428 | 1108 |
| Right lingual gyrus                    | -0.016 | 14.010 | 0.691 | 0.927 | 1431 | 1107 |
| Right entorhinal cortex                | -0.016 | 5.147  | 0.705 | 0.927 | 1242 | 1010 |
| Left rostral middle frontal gyrus      | -0.015 | 22.645 | 0.712 | 0.927 | 1427 | 1101 |
| Right middle temporal gyrus            | -0.014 | 13.227 | 0.736 | 0.927 | 1401 | 1092 |
| Left middle temporal gyrus             | -0.011 | 13.424 | 0.784 | 0.953 | 1319 | 1020 |
| Right precentral gyrus                 | -0.009 | 18.109 | 0.829 | 0.972 | 1403 | 1087 |
| Left precentral gyrus                  | -0.009 | 16.584 | 0.819 | 0.972 | 1406 | 1093 |
| Left posterior cingulate cortex        | -0.008 | 6.241  | 0.849 | 0.974 | 1429 | 1107 |
| Right caudal middle frontal gyrus      | -0.007 | 13.445 | 0.859 | 0.974 | 1421 | 1102 |
| Left rostral anterior cingulate cortex | -0.006 | 5.344  | 0.881 | 0.982 | 1413 | 1094 |
| Left paracentral lobule                | -0.004 | 6.622  | 0.929 | 0.983 | 1428 | 1105 |

|                                       |        |        |       |       |      |      |
|---------------------------------------|--------|--------|-------|-------|------|------|
| Right fusiform gyrus                  | -0.002 | 13.813 | 0.954 | 0.983 | 1426 | 1089 |
| Right medial orbitofrontal cortex     | -0.001 | 6.888  | 0.990 | 0.992 | 1426 | 1103 |
| Right temporal pole                   | <0.001 | 2.448  | 0.992 | 0.992 | 1428 | 1091 |
| Right inferior temporal cortex gyrus  | 0.003  | 15.226 | 0.947 | 0.983 | 1399 | 1104 |
| Left banks superior temporal sulcus   | 0.004  | 6.340  | 0.927 | 0.983 | 1282 | 1017 |
| Right postcentral gyrus               | 0.004  | 15.710 | 0.928 | 0.983 | 1412 | 1098 |
| Right parahippocampal gyrus           | 0.013  | 3.796  | 0.751 | 0.928 | 1418 | 1104 |
| Left precuneus                        | 0.014  | 14.454 | 0.732 | 0.927 | 1424 | 1107 |
| Left caudal anterior cingulate cortex | 0.023  | 5.037  | 0.575 | 0.910 | 1413 | 1095 |
| Left inferior parietal cortex         | 0.025  | 21.434 | 0.545 | 0.906 | 1363 | 1075 |
| Right banks superior temporal sulcus  | 0.028  | 5.222  | 0.507 | 0.885 | 1319 | 1040 |
| Right frontal pole                    | 0.033  | 1.708  | 0.413 | 0.877 | 1432 | 1110 |
| Right inferior parietal cortex        | 0.037  | 24.385 | 0.364 | 0.823 | 1377 | 1080 |
| Left fusiform gyrus                   | 0.038  | 14.279 | 0.344 | 0.823 | 1426 | 1104 |
| Right paracentral lobule              | 0.043  | 7.650  | 0.289 | 0.819 | 1430 | 1107 |
| Left parahippocampal gyrus            | 0.046  | 3.927  | 0.258 | 0.797 | 1422 | 1107 |

**TABLE S17c:** Full mega-analytic results for surface area of each structure for the adult OCD patients with current comorbid anxiety compared with adult patients without, controlling for age, sex, scan center and ICV.

|                                                | <b>Cohen's d<sup>a</sup><br/>(NoCurAnx vs CurAnx)</b> | <b>Standard Error</b> | <b>P-value</b> | <b>FDR P-value</b> | <b>N patients with<br/>current anxiety</b> | <b>N patients with no<br/>current anxiety</b> |
|------------------------------------------------|-------------------------------------------------------|-----------------------|----------------|--------------------|--------------------------------------------|-----------------------------------------------|
| <b>Right postcentral gyrus</b>                 | -0.075                                                | 30.680                | 0.321          | 0.851              | 214                                        | 1098                                          |
| <b>Left posterior cingulate cortex</b>         | -0.061                                                | 12.036                | 0.410          | 0.907              | 224                                        | 1107                                          |
| <b>Left supramarginal gyrus</b>                | -0.055                                                | 38.337                | 0.487          | 0.947              | 191                                        | 1028                                          |
| <b>Left caudal anterior cingulate cortex</b>   | -0.053                                                | 10.196                | 0.480          | 0.947              | 217                                        | 1095                                          |
| <b>Right middle temporal gyrus</b>             | -0.046                                                | 25.882                | 0.539          | 0.948              | 217                                        | 1092                                          |
| <b>Left superior parietal cortex</b>           | -0.044                                                | 41.758                | 0.558          | 0.948              | 219                                        | 1089                                          |
| <b>Left pars opercularis</b>                   | -0.038                                                | 19.429                | 0.610          | 0.951              | 223                                        | 1105                                          |
| <b>Right paracentral lobule</b>                | -0.037                                                | 15.518                | 0.619          | 0.951              | 224                                        | 1107                                          |
| <b>Right superior parietal cortex</b>          | -0.027                                                | 41.765                | 0.717          | 0.951              | 215                                        | 1092                                          |
| <b>Right inferior parietal cortex</b>          | -0.022                                                | 48.106                | 0.769          | 0.951              | 215                                        | 1080                                          |
| <b>Left isthmus cingulate cortex</b>           | -0.015                                                | 12.315                | 0.842          | 0.951              | 222                                        | 1108                                          |
| <b>Right frontal pole</b>                      | -0.015                                                | 3.445                 | 0.835          | 0.951              | 223                                        | 1110                                          |
| <b>Left paracentral lobule</b>                 | -0.014                                                | 12.886                | 0.854          | 0.951              | 223                                        | 1105                                          |
| <b>Right pars triangularis</b>                 | -0.012                                                | 18.266                | 0.872          | 0.951              | 210                                        | 1091                                          |
| <b>Left frontal pole</b>                       | -0.010                                                | 2.671                 | 0.898          | 0.951              | 221                                        | 1107                                          |
| <b>Left transverse temporal cortex</b>         | -0.009                                                | 5.660                 | 0.906          | 0.951              | 222                                        | 1109                                          |
| <b>Right precuneus</b>                         | -0.005                                                | 31.055                | 0.949          | 0.958              | 223                                        | 1106                                          |
| <b>Right superior temporal gyrus</b>           | 0.004                                                 | 25.297                | 0.958          | 0.958              | 197                                        | 1032                                          |
| <b>Right caudal anterior cingulate cortex</b>  | 0.007                                                 | 11.115                | 0.921          | 0.951              | 218                                        | 1106                                          |
| <b>Left rostral anterior cingulate cortex</b>  | 0.007                                                 | 10.396                | 0.923          | 0.951              | 217                                        | 1094                                          |
| <b>Right rostral anterior cingulate cortex</b> | 0.008                                                 | 9.785                 | 0.911          | 0.951              | 217                                        | 1100                                          |
| <b>Right fusiform gyrus</b>                    | 0.011                                                 | 27.615                | 0.881          | 0.951              | 210                                        | 1089                                          |
| <b>Right isthmus cingulate cortex</b>          | 0.013                                                 | 11.334                | 0.859          | 0.951              | 224                                        | 1110                                          |
| <b>Left insula</b>                             | 0.015                                                 | 15.873                | 0.839          | 0.951              | 221                                        | 1090                                          |
| <b>Right precentral gyrus</b>                  | 0.015                                                 | 36.820                | 0.849          | 0.951              | 209                                        | 1087                                          |

|                                      |       |         |       |       |     |      |
|--------------------------------------|-------|---------|-------|-------|-----|------|
| Right temporal pole                  | 0.016 | 4.800   | 0.829 | 0.951 | 210 | 1091 |
| Left lingual gyrus                   | 0.016 | 29.034  | 0.826 | 0.951 | 224 | 1104 |
| Left fusiform gyrus                  | 0.017 | 28.499  | 0.820 | 0.951 | 223 | 1104 |
| Left medial orbitofrontal cortex     | 0.020 | 16.401  | 0.787 | 0.951 | 220 | 1108 |
| Left superior frontal gyrus          | 0.028 | 47.968  | 0.716 | 0.951 | 204 | 1073 |
| Right pars opercularis               | 0.029 | 17.327  | 0.700 | 0.951 | 220 | 1099 |
| Right insula                         | 0.031 | 17.348  | 0.680 | 0.951 | 218 | 1085 |
| Left temporal pole                   | 0.035 | 4.674   | 0.641 | 0.951 | 223 | 1108 |
| Left pars triangularis               | 0.037 | 14.220  | 0.616 | 0.951 | 222 | 1107 |
| Right inferior temporal cortex gyrus | 0.044 | 30.607  | 0.550 | 0.948 | 222 | 1104 |
| Left superior temporal gyrus         | 0.051 | 28.291  | 0.520 | 0.948 | 195 | 998  |
| Left inferior parietal cortex        | 0.051 | 42.851  | 0.508 | 0.948 | 208 | 1075 |
| Right superior frontal gyrus         | 0.055 | 47.607  | 0.464 | 0.947 | 217 | 1102 |
| Right posterior cingulate cortex     | 0.056 | 12.951  | 0.452 | 0.947 | 222 | 1110 |
| Left precentral gyrus                | 0.061 | 33.649  | 0.413 | 0.907 | 219 | 1093 |
| Left lateral orbitofrontal cortex    | 0.063 | 18.671  | 0.400 | 0.907 | 222 | 1110 |
| Left pericalcarine gyrus             | 0.064 | 16.474  | 0.391 | 0.907 | 221 | 1099 |
| Right supramarginal gyrus            | 0.065 | 37.508  | 0.413 | 0.907 | 192 | 1043 |
| Right parahippocampal gyrus          | 0.073 | 7.430   | 0.325 | 0.851 | 223 | 1104 |
| Right transverse temporal cortex     | 0.076 | 4.262   | 0.309 | 0.851 | 223 | 1111 |
| Left caudal middle frontal gyrus     | 0.077 | 26.441  | 0.304 | 0.851 | 218 | 1099 |
| Left postcentral gyrus               | 0.083 | 32.318  | 0.271 | 0.839 | 215 | 1090 |
| Left rostral middle frontal gyrus    | 0.083 | 43.683  | 0.265 | 0.839 | 222 | 1101 |
| Right caudal middle frontal gyrus    | 0.086 | 26.602  | 0.246 | 0.839 | 222 | 1102 |
| Left surface area                    | 0.089 | 365.033 | 0.230 | 1.000 | 224 | 1112 |
| Left inferior temporal cortex gyrus  | 0.089 | 31.357  | 0.235 | 0.839 | 221 | 1087 |
| Right banks superior temporal sulcus | 0.091 | 10.513  | 0.251 | 0.839 | 193 | 1040 |
| Left banks superior temporal sulcus  | 0.096 | 13.013  | 0.225 | 0.839 | 193 | 1017 |
| Right surface area                   | 0.099 | 368.551 | 0.184 | 1.000 | 223 | 1111 |



|                                           |       |        |       |       |     |      |
|-------------------------------------------|-------|--------|-------|-------|-----|------|
| <b>Left middle temporal gyrus</b>         | 0.106 | 26.738 | 0.178 | 0.758 | 195 | 1020 |
| <b>Left entorhinal cortex</b>             | 0.109 | 6.329  | 0.170 | 0.758 | 193 | 1032 |
| <b>Right lingual gyrus</b>                | 0.116 | 28.948 | 0.117 | 0.568 | 223 | 1107 |
| <b>Right pericalcarine gyrus</b>          | 0.118 | 17.455 | 0.112 | 0.568 | 222 | 1093 |
| <b>Left parahippocampal gyrus</b>         | 0.128 | 8.033  | 0.085 | 0.484 | 220 | 1107 |
| <b>Left precuneus</b>                     | 0.133 | 28.941 | 0.072 | 0.444 | 224 | 1107 |
| <b>Left cuneus</b>                        | 0.143 | 15.040 | 0.054 | 0.372 | 223 | 1081 |
| <b>Right lateral orbitofrontal cortex</b> | 0.149 | 19.969 | 0.045 | 0.372 | 224 | 1111 |
| <b>Left lateral occipital cortex</b>      | 0.153 | 37.269 | 0.040 | 0.372 | 222 | 1096 |
| <b>Right rostral middle frontal gyrus</b> | 0.156 | 44.232 | 0.036 | 0.372 | 223 | 1108 |
| <b>Right entorhinal cortex</b>            | 0.159 | 7.395  | 0.055 | 0.372 | 177 | 1010 |
| <b>Right lateral occipital cortex</b>     | 0.177 | 38.963 | 0.018 | 0.252 | 220 | 1097 |
| <b>Right cuneus</b>                       | 0.177 | 14.861 | 0.019 | 0.252 | 219 | 1084 |
| <b>Right pars orbitalis</b>               | 0.181 | 7.239  | 0.015 | 0.252 | 223 | 1110 |
| <b>Left pars orbitalis</b>                | 0.183 | 5.835  | 0.014 | 0.252 | 220 | 1107 |
| <b>Right medial orbitofrontal cortex</b>  | 0.188 | 13.522 | 0.011 | 0.252 | 223 | 1103 |

**TABLE S18a:** Full mega-analytic results for cortical thickness of each structure for the pediatric OCD patients with current comorbid anxiety compared with pediatric healthy controls, controlling for age, sex and scan center.

|                                     | <b>Cohen's d<sup>a</sup><br/>(CurAnx vs HC)</b> | <b>Standard Error</b> | <b>P-value</b> | <b>FDR P-value</b> | <b>N controls</b> | <b>N patients</b> |
|-------------------------------------|-------------------------------------------------|-----------------------|----------------|--------------------|-------------------|-------------------|
| Left inferior parietal cortex       | -0.324                                          | 0.018                 | 0.003          | 0.099              | 301               | 121               |
| Left supramarginal gyrus            | -0.296                                          | 0.018                 | 0.006          | 0.099              | 299               | 126               |
| Left precuneus                      | -0.291                                          | 0.016                 | 0.006          | 0.099              | 320               | 130               |
| Right superior parietal cortex      | -0.286                                          | 0.015                 | 0.008          | 0.099              | 320               | 128               |
| Left superior parietal cortex       | -0.278                                          | 0.015                 | 0.009          | 0.099              | 317               | 131               |
| Left lateral occipital cortex       | -0.277                                          | 0.014                 | 0.009          | 0.099              | 319               | 130               |
| Left cuneus                         | -0.274                                          | 0.016                 | 0.010          | 0.099              | 320               | 130               |
| Right rostral middle frontal gyrus  | -0.247                                          | 0.017                 | 0.020          | 0.156              | 317               | 131               |
| Right cortical thickness            | -0.237                                          | 0.012                 | 0.024          | 0.160              | 324               | 132               |
| Right precuneus                     | -0.237                                          | 0.016                 | 0.026          | 0.160              | 324               | 129               |
| Right fusiform gyrus                | -0.235                                          | 0.016                 | 0.027          | 0.160              | 314               | 130               |
| Right postcentral gyrus             | -0.218                                          | 0.015                 | 0.044          | 0.205              | 309               | 125               |
| Right inferior parietal cortex      | -0.216                                          | 0.018                 | 0.046          | 0.205              | 309               | 126               |
| Right lateral occipital cortex      | -0.213                                          | 0.014                 | 0.044          | 0.205              | 321               | 131               |
| Right caudal middle frontal gyrus   | -0.212                                          | 0.020                 | 0.047          | 0.205              | 318               | 129               |
| Left cortical thickness             | -0.203                                          | 0.011                 | 0.054          | 0.223              | 324               | 132               |
| Right cuneus                        | -0.195                                          | 0.018                 | 0.066          | 0.246              | 323               | 130               |
| Right paracentral lobule            | -0.192                                          | 0.020                 | 0.070          | 0.246              | 323               | 130               |
| Left banks superior temporal sulcus | -0.192                                          | 0.023                 | 0.078          | 0.259              | 297               | 125               |
| Left precentral gyrus               | -0.178                                          | 0.017                 | 0.097          | 0.308              | 313               | 127               |
| Right superior frontal gyrus        | -0.173                                          | 0.019                 | 0.107          | 0.324              | 310               | 127               |
| Left postcentral gyrus              | -0.167                                          | 0.014                 | 0.121          | 0.352              | 312               | 126               |
| Left pericalcarine gyrus            | -0.154                                          | 0.016                 | 0.147          | 0.394              | 320               | 130               |
| Right supramarginal gyrus           | -0.153                                          | 0.018                 | 0.158          | 0.394              | 303               | 125               |
| Left paracentral lobule             | -0.152                                          | 0.020                 | 0.149          | 0.394              | 321               | 131               |

|                                      |        |       |       |       |     |     |
|--------------------------------------|--------|-------|-------|-------|-----|-----|
| Right pars triangularis              | -0.147 | 0.020 | 0.164 | 0.394 | 321 | 130 |
| Right precentral gyrus               | -0.145 | 0.016 | 0.178 | 0.394 | 312 | 125 |
| Left posterior cingulate cortex      | -0.143 | 0.020 | 0.179 | 0.394 | 320 | 129 |
| Left caudal middle frontal gyrus     | -0.143 | 0.019 | 0.177 | 0.394 | 321 | 130 |
| Left middle temporal gyrus           | -0.140 | 0.021 | 0.195 | 0.394 | 309 | 126 |
| Right pericalcarine gyrus            | -0.140 | 0.016 | 0.184 | 0.394 | 323 | 132 |
| Left lingual gyrus                   | -0.139 | 0.015 | 0.187 | 0.394 | 321 | 131 |
| Right middle temporal gyrus          | -0.137 | 0.020 | 0.203 | 0.394 | 307 | 127 |
| Right pars orbitalis                 | -0.136 | 0.028 | 0.199 | 0.394 | 322 | 130 |
| Right lingual gyrus                  | -0.127 | 0.015 | 0.227 | 0.429 | 323 | 132 |
| Left fusiform gyrus                  | -0.124 | 0.015 | 0.243 | 0.447 | 314 | 130 |
| Left superior frontal gyrus          | -0.116 | 0.019 | 0.274 | 0.488 | 316 | 129 |
| Left transverse temporal cortex      | -0.114 | 0.025 | 0.282 | 0.488 | 322 | 131 |
| Right isthmus cingulate cortex       | -0.093 | 0.024 | 0.380 | 0.579 | 322 | 128 |
| Left isthmus cingulate cortex        | -0.093 | 0.023 | 0.379 | 0.579 | 322 | 129 |
| Right pars opercularis               | -0.082 | 0.020 | 0.442 | 0.646 | 316 | 127 |
| Left rostral middle frontal gyrus    | -0.081 | 0.016 | 0.443 | 0.646 | 321 | 132 |
| Right banks superior temporal sulcus | -0.081 | 0.023 | 0.460 | 0.658 | 298 | 122 |
| Left pars opercularis                | -0.068 | 0.018 | 0.524 | 0.733 | 319 | 128 |
| Left pars orbitalis                  | -0.065 | 0.028 | 0.538 | 0.738 | 322 | 130 |
| Left inferior temporal cortex gyrus  | -0.061 | 0.019 | 0.567 | 0.764 | 315 | 128 |
| Right inferior temporal cortex gyrus | -0.052 | 0.020 | 0.628 | 0.778 | 320 | 126 |
| Left frontal pole                    | -0.052 | 0.039 | 0.619 | 0.778 | 323 | 131 |
| Right insula                         | -0.051 | 0.021 | 0.634 | 0.778 | 312 | 127 |
| Right superior temporal gyrus        | -0.049 | 0.020 | 0.648 | 0.781 | 298 | 126 |
| Right lateral orbitofrontal cortex   | -0.047 | 0.020 | 0.658 | 0.781 | 322 | 131 |
| Right posterior cingulate cortex     | -0.034 | 0.019 | 0.747 | 0.861 | 322 | 130 |
| Right temporal pole                  | -0.012 | 0.047 | 0.912 | 0.973 | 322 | 129 |
| Left insula                          | -0.004 | 0.019 | 0.973 | 0.973 | 315 | 130 |

|                                         |       |       |       |       |     |     |
|-----------------------------------------|-------|-------|-------|-------|-----|-----|
| Left caudal anterior cingulate cortex   | 0.004 | 0.031 | 0.968 | 0.973 | 316 | 129 |
| Right transverse temporal cortex        | 0.006 | 0.025 | 0.952 | 0.973 | 320 | 132 |
| Left medial orbitofrontal cortex        | 0.006 | 0.021 | 0.953 | 0.973 | 320 | 129 |
| Right caudal anterior cingulate cortex  | 0.009 | 0.030 | 0.934 | 0.973 | 310 | 129 |
| Left entorhinal cortex                  | 0.011 | 0.042 | 0.919 | 0.973 | 287 | 118 |
| Right frontal pole                      | 0.022 | 0.040 | 0.831 | 0.923 | 319 | 132 |
| Right rostral anterior cingulate cortex | 0.027 | 0.031 | 0.798 | 0.901 | 310 | 128 |
| Left pars triangularis                  | 0.034 | 0.020 | 0.750 | 0.861 | 321 | 129 |
| Left superior temporal gyrus            | 0.058 | 0.020 | 0.592 | 0.768 | 304 | 125 |
| Right entorhinal cortex                 | 0.062 | 0.044 | 0.587 | 0.768 | 276 | 112 |
| Left lateral orbitofrontal cortex       | 0.098 | 0.019 | 0.350 | 0.557 | 324 | 132 |
| Left temporal pole                      | 0.102 | 0.045 | 0.334 | 0.547 | 321 | 131 |
| Right medial orbitofrontal cortex       | 0.102 | 0.021 | 0.336 | 0.547 | 319 | 130 |
| Right parahippocampal gyrus             | 0.114 | 0.031 | 0.286 | 0.488 | 317 | 127 |
| Left parahippocampal gyrus              | 0.193 | 0.034 | 0.069 | 0.246 | 317 | 129 |
| Left rostral anterior cingulate cortex  | 0.264 | 0.029 | 0.014 | 0.118 | 316 | 128 |

**TABLE S18b:** Full mega-analytic results for cortical thickness of each structure for the pediatric OCD patients with no current comorbid anxiety compared with pediatric healthy controls, controlling for age, sex and scan center.

|                                      | <b>Cohen's d<sup>a</sup><br/>(NoCurAnx vs HC)</b> | <b>Standard Error</b> | <b>P-value</b> | <b>FDR P-value</b> | <b>N controls</b> | <b>N patients</b> |
|--------------------------------------|---------------------------------------------------|-----------------------|----------------|--------------------|-------------------|-------------------|
| Left inferior parietal cortex        | -0.323                                            | 0.014                 | 2.841E-04      | 0.020              | 301               | 235               |
| Left superior parietal cortex        | -0.261                                            | 0.012                 | 0.003          | 0.074              | 317               | 243               |
| Right inferior parietal cortex       | -0.259                                            | 0.014                 | 0.003          | 0.074              | 309               | 237               |
| Right superior parietal cortex       | -0.244                                            | 0.012                 | 0.005          | 0.083              | 320               | 245               |
| Left lateral occipital cortex        | -0.217                                            | 0.011                 | 0.012          | 0.172              | 319               | 243               |
| Left precuneus                       | -0.191                                            | 0.013                 | 0.027          | 0.316              | 320               | 244               |
| Left isthmus cingulate cortex        | -0.167                                            | 0.020                 | 0.053          | 0.457              | 322               | 242               |
| Right cuneus                         | -0.164                                            | 0.014                 | 0.057          | 0.457              | 323               | 242               |
| Left pericalcarine gyrus             | -0.163                                            | 0.013                 | 0.060          | 0.457              | 320               | 243               |
| Left cortical thickness              | -0.155                                            | 0.009                 | 0.072          | 0.457              | 324               | 246               |
| Left cuneus                          | -0.154                                            | 0.013                 | 0.074          | 0.457              | 320               | 244               |
| Left parahippocampal gyrus           | -0.153                                            | 0.027                 | 0.078          | 0.457              | 317               | 242               |
| Right caudal middle frontal gyrus    | -0.145                                            | 0.016                 | 0.094          | 0.495              | 318               | 242               |
| Right parahippocampal gyrus          | -0.141                                            | 0.023                 | 0.104          | 0.495              | 317               | 242               |
| Right posterior cingulate cortex     | -0.140                                            | 0.015                 | 0.106          | 0.495              | 322               | 242               |
| Right banks superior temporal sulcus | -0.137                                            | 0.019                 | 0.123          | 0.539              | 298               | 233               |
| Right pericalcarine gyrus            | -0.130                                            | 0.013                 | 0.132          | 0.545              | 323               | 241               |
| Left middle temporal gyrus           | -0.114                                            | 0.018                 | 0.195          | 0.634              | 309               | 235               |
| Left supramarginal gyrus             | -0.107                                            | 0.014                 | 0.231          | 0.634              | 299               | 229               |
| Right lateral occipital cortex       | -0.105                                            | 0.012                 | 0.223          | 0.634              | 321               | 242               |
| Left posterior cingulate cortex      | -0.101                                            | 0.017                 | 0.240          | 0.634              | 320               | 243               |
| Left fusiform gyrus                  | -0.099                                            | 0.013                 | 0.254          | 0.634              | 314               | 244               |
| Left inferior temporal cortex gyrus  | -0.098                                            | 0.016                 | 0.260          | 0.634              | 315               | 241               |
| Left transverse temporal cortex      | -0.098                                            | 0.020                 | 0.255          | 0.634              | 322               | 244               |
| Left banks superior temporal sulcus  | -0.096                                            | 0.019                 | 0.290          | 0.634              | 297               | 216               |

|                                         |        |       |       |       |     |     |
|-----------------------------------------|--------|-------|-------|-------|-----|-----|
| Right cortical thickness                | -0.096 | 0.009 | 0.261 | 0.634 | 324 | 246 |
| Right rostral anterior cingulate cortex | -0.094 | 0.026 | 0.283 | 0.634 | 310 | 241 |
| Right precuneus                         | -0.094 | 0.013 | 0.274 | 0.634 | 324 | 242 |
| Left lingual gyrus                      | -0.084 | 0.012 | 0.330 | 0.701 | 321 | 243 |
| Left medial orbitofrontal cortex        | -0.076 | 0.018 | 0.380 | 0.760 | 320 | 243 |
| Left frontal pole                       | -0.075 | 0.033 | 0.380 | 0.760 | 323 | 245 |
| Left paracentral lobule                 | -0.070 | 0.016 | 0.417 | 0.810 | 321 | 243 |
| Right insula                            | -0.069 | 0.016 | 0.432 | 0.818 | 312 | 238 |
| Right isthmus cingulate cortex          | -0.065 | 0.019 | 0.448 | 0.826 | 322 | 243 |
| Right inferior temporal cortex gyrus    | -0.063 | 0.016 | 0.470 | 0.843 | 320 | 240 |
| Left entorhinal cortex                  | -0.063 | 0.034 | 0.485 | 0.843 | 287 | 229 |
| Right supramarginal gyrus               | -0.059 | 0.014 | 0.506 | 0.843 | 303 | 234 |
| Left pars triangularis                  | -0.058 | 0.016 | 0.499 | 0.843 | 321 | 245 |
| Left superior frontal gyrus             | -0.056 | 0.015 | 0.519 | 0.844 | 316 | 240 |
| Left postcentral gyrus                  | -0.055 | 0.011 | 0.530 | 0.844 | 312 | 237 |
| Right transverse temporal cortex        | -0.051 | 0.020 | 0.557 | 0.852 | 320 | 245 |
| Right middle temporal gyrus             | -0.051 | 0.016 | 0.560 | 0.852 | 307 | 235 |
| Right postcentral gyrus                 | -0.041 | 0.011 | 0.641 | 0.945 | 309 | 240 |
| Left precentral gyrus                   | -0.040 | 0.013 | 0.648 | 0.945 | 313 | 242 |
| Left temporal pole                      | -0.038 | 0.038 | 0.663 | 0.946 | 321 | 240 |
| Left superior temporal gyrus            | -0.037 | 0.016 | 0.676 | 0.946 | 304 | 227 |
| Right precentral gyrus                  | -0.031 | 0.014 | 0.724 | 0.950 | 312 | 242 |
| Right entorhinal cortex                 | -0.028 | 0.035 | 0.761 | 0.950 | 276 | 215 |
| Right superior temporal gyrus           | -0.022 | 0.016 | 0.801 | 0.950 | 298 | 233 |
| Right superior frontal gyrus            | -0.021 | 0.016 | 0.812 | 0.950 | 310 | 241 |
| Left caudal middle frontal gyrus        | -0.014 | 0.015 | 0.872 | 0.950 | 321 | 246 |
| Right pars triangularis                 | -0.013 | 0.016 | 0.880 | 0.950 | 321 | 243 |
| Right rostral middle frontal gyrus      | -0.013 | 0.014 | 0.877 | 0.950 | 317 | 244 |
| Left pars opercularis                   | -0.008 | 0.015 | 0.923 | 0.950 | 319 | 242 |

|                                               |        |       |       |       |     |     |
|-----------------------------------------------|--------|-------|-------|-------|-----|-----|
| <b>Right frontal pole</b>                     | -0.007 | 0.032 | 0.939 | 0.950 | 319 | 245 |
| <b>Left caudal anterior cingulate cortex</b>  | -0.006 | 0.025 | 0.941 | 0.950 | 316 | 238 |
| <b>Left rostral middle frontal gyrus</b>      | -0.005 | 0.014 | 0.950 | 0.950 | 321 | 245 |
| <b>Right pars opercularis</b>                 | 0.009  | 0.016 | 0.914 | 0.950 | 316 | 244 |
| <b>Left pars orbitalis</b>                    | 0.010  | 0.023 | 0.911 | 0.950 | 322 | 244 |
| <b>Left rostral anterior cingulate cortex</b> | 0.011  | 0.025 | 0.904 | 0.950 | 316 | 238 |
| <b>Right fusiform gyrus</b>                   | 0.015  | 0.013 | 0.859 | 0.950 | 314 | 243 |
| <b>Right pars orbitalis</b>                   | 0.021  | 0.022 | 0.806 | 0.950 | 322 | 245 |
| <b>Left insula</b>                            | 0.022  | 0.015 | 0.804 | 0.950 | 315 | 238 |
| <b>Right paracentral lobule</b>               | 0.025  | 0.016 | 0.770 | 0.950 | 323 | 244 |
| <b>Right temporal pole</b>                    | 0.027  | 0.038 | 0.757 | 0.950 | 322 | 242 |
| <b>Right lingual gyrus</b>                    | 0.029  | 0.012 | 0.738 | 0.950 | 323 | 245 |
| <b>Right lateral orbitofrontal cortex</b>     | 0.095  | 0.016 | 0.271 | 0.634 | 322 | 245 |
| <b>Right caudal anterior cingulate cortex</b> | 0.101  | 0.024 | 0.247 | 0.634 | 310 | 243 |
| <b>Left lateral orbitofrontal cortex</b>      | 0.106  | 0.017 | 0.216 | 0.634 | 324 | 245 |
| <b>Right medial orbitofrontal cortex</b>      | 0.125  | 0.018 | 0.151 | 0.586 | 319 | 238 |

**TABLE S18c:** Full mega-analytic results for cortical thickness of each structure for the pediatric OCD patients with current comorbid anxiety compared with pediatric patients without, controlling for age, sex and scan center.

|                                        | Cohen's d <sup>a</sup><br>(NoCurAnx vs CurAnx) | Standard Error | P-value | FDR P-value | N patients with<br>current anxiety | N patients without<br>current anxiety |
|----------------------------------------|------------------------------------------------|----------------|---------|-------------|------------------------------------|---------------------------------------|
| Right rostral middle frontal gyrus     | -0.279                                         | 0.019          | 0.012   | 0.273       | 131                                | 244                                   |
| Right paracentral lobule               | -0.271                                         | 0.020          | 0.015   | 0.273       | 130                                | 244                                   |
| Left supramarginal gyrus               | -0.270                                         | 0.019          | 0.018   | 0.273       | 126                                | 229                                   |
| Right postcentral gyrus                | -0.256                                         | 0.016          | 0.023   | 0.273       | 125                                | 240                                   |
| Right fusiform gyrus                   | -0.253                                         | 0.017          | 0.023   | 0.273       | 130                                | 243                                   |
| Right lateral occipital cortex         | -0.237                                         | 0.014          | 0.032   | 0.324       | 131                                | 242                                   |
| Right cortical thickness               | -0.211                                         | 0.012          | 0.055   | 0.483       | 132                                | 246                                   |
| Right precuneus                        | -0.204                                         | 0.017          | 0.068   | 0.507       | 129                                | 242                                   |
| Right pars orbitalis                   | -0.195                                         | 0.028          | 0.079   | 0.507       | 130                                | 245                                   |
| Left caudal middle frontal gyrus       | -0.184                                         | 0.021          | 0.096   | 0.507       | 130                                | 246                                   |
| Right caudal anterior cingulate cortex | -0.182                                         | 0.032          | 0.102   | 0.507       | 129                                | 243                                   |
| Left banks superior temporal sulcus    | -0.178                                         | 0.023          | 0.123   | 0.507       | 125                                | 216                                   |
| Left postcentral gyrus                 | -0.178                                         | 0.015          | 0.114   | 0.507       | 126                                | 237                                   |
| Left precentral gyrus                  | -0.167                                         | 0.017          | 0.136   | 0.507       | 127                                | 242                                   |
| Left precuneus                         | -0.166                                         | 0.017          | 0.134   | 0.507       | 130                                | 244                                   |
| Left paracentral lobule                | -0.162                                         | 0.021          | 0.143   | 0.507       | 131                                | 243                                   |
| Left lateral occipital cortex          | -0.160                                         | 0.015          | 0.149   | 0.507       | 130                                | 243                                   |
| Right superior frontal gyrus           | -0.160                                         | 0.022          | 0.152   | 0.507       | 127                                | 241                                   |
| Right supramarginal gyrus              | -0.158                                         | 0.018          | 0.164   | 0.522       | 125                                | 234                                   |
| Right pars triangularis                | -0.152                                         | 0.022          | 0.171   | 0.522       | 130                                | 243                                   |
| Left posterior cingulate cortex        | -0.147                                         | 0.021          | 0.187   | 0.545       | 129                                | 243                                   |
| Right lateral orbitofrontal cortex     | -0.135                                         | 0.021          | 0.221   | 0.581       | 131                                | 245                                   |
| Left cortical thickness                | -0.130                                         | 0.012          | 0.237   | 0.581       | 132                                | 246                                   |
| Right caudal middle frontal gyrus      | -0.130                                         | 0.022          | 0.241   | 0.581       | 129                                | 242                                   |
| Right middle temporal gyrus            | -0.129                                         | 0.022          | 0.253   | 0.581       | 127                                | 235                                   |



|                                       |        |       |       |       |     |     |
|---------------------------------------|--------|-------|-------|-------|-----|-----|
| Right precentral gyrus                | -0.129 | 0.018 | 0.252 | 0.581 | 125 | 242 |
| Left pars orbitalis                   | -0.129 | 0.031 | 0.245 | 0.581 | 130 | 244 |
| Right pars opercularis                | -0.127 | 0.021 | 0.257 | 0.581 | 127 | 244 |
| Left inferior parietal cortex         | -0.116 | 0.018 | 0.310 | 0.638 | 121 | 235 |
| Left superior frontal gyrus           | -0.115 | 0.021 | 0.304 | 0.638 | 129 | 240 |
| Right lingual gyrus                   | -0.107 | 0.016 | 0.332 | 0.659 | 132 | 245 |
| Left transverse temporal cortex       | -0.105 | 0.026 | 0.342 | 0.659 | 131 | 244 |
| Right superior parietal cortex        | -0.104 | 0.017 | 0.348 | 0.659 | 128 | 245 |
| Left superior parietal cortex         | -0.098 | 0.017 | 0.377 | 0.690 | 131 | 243 |
| Left pars opercularis                 | -0.091 | 0.020 | 0.417 | 0.690 | 128 | 242 |
| Left rostral middle frontal gyrus     | -0.090 | 0.018 | 0.414 | 0.690 | 132 | 245 |
| Left caudal anterior cingulate cortex | -0.089 | 0.034 | 0.426 | 0.690 | 129 | 238 |
| Left insula                           | -0.086 | 0.020 | 0.438 | 0.690 | 130 | 238 |
| Right superior temporal gyrus         | -0.085 | 0.021 | 0.451 | 0.690 | 126 | 233 |
| Left cuneus                           | -0.084 | 0.016 | 0.450 | 0.690 | 130 | 244 |
| Left fusiform gyrus                   | -0.083 | 0.017 | 0.452 | 0.690 | 130 | 244 |
| Left middle temporal gyrus            | -0.056 | 0.022 | 0.622 | 0.837 | 126 | 235 |
| Right cuneus                          | -0.052 | 0.018 | 0.642 | 0.848 | 130 | 242 |
| Left lingual gyrus                    | -0.043 | 0.016 | 0.697 | 0.859 | 131 | 243 |
| Right temporal pole                   | -0.041 | 0.050 | 0.712 | 0.859 | 129 | 242 |
| Left lateral orbitofrontal cortex     | -0.036 | 0.023 | 0.741 | 0.880 | 132 | 245 |
| Right inferior parietal cortex        | -0.031 | 0.019 | 0.781 | 0.889 | 126 | 237 |
| Right inferior temporal cortex gyrus  | -0.030 | 0.021 | 0.787 | 0.889 | 126 | 240 |
| Right medial orbitofrontal cortex     | -0.021 | 0.024 | 0.848 | 0.942 | 130 | 238 |
| Right pericalcarine gyrus             | -0.013 | 0.017 | 0.903 | 0.968 | 132 | 241 |
| Right insula                          | -0.010 | 0.022 | 0.928 | 0.969 | 127 | 238 |
| Right isthmus cingulate cortex        | -0.003 | 0.025 | 0.981 | 0.993 | 128 | 243 |
| Right banks superior temporal sulcus  | -0.003 | 0.024 | 0.981 | 0.993 | 122 | 233 |
| Left inferior temporal cortex gyrus   | 0.001  | 0.022 | 0.993 | 0.993 | 128 | 241 |

|                                         |       |       |       |       |     |     |
|-----------------------------------------|-------|-------|-------|-------|-----|-----|
| Right posterior cingulate cortex        | 0.012 | 0.019 | 0.913 | 0.968 | 130 | 242 |
| Left frontal pole                       | 0.018 | 0.045 | 0.867 | 0.948 | 131 | 245 |
| Left superior temporal gyrus            | 0.036 | 0.021 | 0.754 | 0.880 | 125 | 227 |
| Right entorhinal cortex                 | 0.044 | 0.044 | 0.710 | 0.859 | 112 | 215 |
| Left isthmus cingulate cortex           | 0.045 | 0.026 | 0.686 | 0.859 | 129 | 242 |
| Left entorhinal cortex                  | 0.049 | 0.043 | 0.672 | 0.859 | 118 | 229 |
| Left pericalcarine gyrus                | 0.056 | 0.017 | 0.616 | 0.837 | 130 | 243 |
| Left pars triangularis                  | 0.064 | 0.022 | 0.565 | 0.791 | 129 | 245 |
| Left medial orbitofrontal cortex        | 0.069 | 0.024 | 0.534 | 0.763 | 129 | 243 |
| Right rostral anterior cingulate cortex | 0.072 | 0.033 | 0.518 | 0.756 | 128 | 241 |
| Right transverse temporal cortex        | 0.081 | 0.027 | 0.461 | 0.690 | 132 | 245 |
| Right frontal pole                      | 0.081 | 0.040 | 0.463 | 0.690 | 132 | 245 |
| Left temporal pole                      | 0.114 | 0.050 | 0.303 | 0.638 | 131 | 240 |
| Left rostral anterior cingulate cortex  | 0.169 | 0.034 | 0.132 | 0.507 | 128 | 238 |
| Right parahippocampal gyrus             | 0.170 | 0.034 | 0.129 | 0.507 | 127 | 242 |
| Left parahippocampal gyrus              | 0.304 | 0.034 | 0.007 | 0.273 | 129 | 242 |

**TABLE S19a:** Full mega-analytic results for surface area of each structure for the pediatric OCD patients with current comorbid anxiety compared with pediatric healthy controls, controlling for age, sex, scan center and ICV.

|                                        | <b>Cohen's d<sup>a</sup><br/>(CurAnx vs HC)</b> | <b>Standard Error</b> | <b>P-value</b> | <b>FDR P-value</b> | <b>N controls</b> | <b>N patients</b> |
|----------------------------------------|-------------------------------------------------|-----------------------|----------------|--------------------|-------------------|-------------------|
| Left posterior cingulate cortex        | -0.268                                          | 18.407                | 0.012          | 0.360              | 320               | 129               |
| Right paracentral lobule               | -0.267                                          | 21.629                | 0.012          | 0.360              | 323               | 130               |
| Right cuneus                           | -0.256                                          | 21.442                | 0.016          | 0.360              | 323               | 130               |
| Left postcentral gyrus                 | -0.246                                          | 44.977                | 0.023          | 0.376              | 312               | 126               |
| Right superior frontal gyrus           | -0.237                                          | 69.682                | 0.028          | 0.376              | 310               | 127               |
| Left inferior parietal cortex          | -0.212                                          | 57.668                | 0.054          | 0.455              | 301               | 121               |
| Left medial orbitofrontal cortex       | -0.199                                          | 23.137                | 0.062          | 0.455              | 320               | 129               |
| Left lateral orbitofrontal cortex      | -0.199                                          | 28.258                | 0.059          | 0.455              | 324               | 132               |
| Right pericalcarine gyrus              | -0.195                                          | 25.341                | 0.065          | 0.455              | 323               | 132               |
| Left caudal anterior cingulate cortex  | -0.187                                          | 14.023                | 0.080          | 0.455              | 316               | 129               |
| Left pericalcarine gyrus               | -0.184                                          | 23.681                | 0.083          | 0.455              | 320               | 130               |
| Left precuneus                         | -0.181                                          | 42.204                | 0.088          | 0.455              | 320               | 130               |
| Left insula                            | -0.177                                          | 21.687                | 0.096          | 0.455              | 315               | 130               |
| Right posterior cingulate cortex       | -0.171                                          | 17.556                | 0.107          | 0.455              | 322               | 130               |
| Right lateral occipital cortex         | -0.171                                          | 52.770                | 0.106          | 0.455              | 321               | 131               |
| Left rostral anterior cingulate cortex | -0.164                                          | 15.295                | 0.125          | 0.472              | 316               | 128               |
| Right medial orbitofrontal cortex      | -0.164                                          | 19.720                | 0.122          | 0.472              | 319               | 130               |
| Right pars triangularis                | -0.151                                          | 24.488                | 0.155          | 0.542              | 321               | 130               |
| Right fusiform gyrus                   | -0.145                                          | 36.934                | 0.173          | 0.542              | 314               | 130               |
| Left pars orbitalis                    | -0.143                                          | 8.658                 | 0.176          | 0.542              | 322               | 130               |
| Left paracentral lobule                | -0.141                                          | 19.589                | 0.183          | 0.542              | 321               | 131               |
| Right precuneus                        | -0.141                                          | 44.107                | 0.183          | 0.542              | 324               | 129               |
| Right surface area                     | -0.137                                          | 529.165               | 0.192          | 1.000              | 324               | 132               |
| Right insula                           | -0.136                                          | 21.312                | 0.206          | 0.546              | 312               | 127               |
| Left lingual gyrus                     | -0.133                                          | 41.732                | 0.209          | 0.546              | 321               | 131               |

|                                        |        |         |       |       |     |     |
|----------------------------------------|--------|---------|-------|-------|-----|-----|
| Left surface area                      | -0.132 | 526.554 | 0.208 | 1.000 | 324 | 132 |
| Left superior frontal gyrus            | -0.126 | 67.211  | 0.238 | 0.600 | 316 | 129 |
| Left cuneus                            | -0.111 | 20.636  | 0.296 | 0.654 | 320 | 130 |
| Left superior parietal cortex          | -0.109 | 57.803  | 0.305 | 0.654 | 317 | 131 |
| Right middle temporal gyrus            | -0.097 | 39.055  | 0.367 | 0.755 | 307 | 127 |
| Left lateral occipital cortex          | -0.093 | 51.126  | 0.381 | 0.762 | 319 | 130 |
| Left fusiform gyrus                    | -0.083 | 39.166  | 0.437 | 0.780 | 314 | 130 |
| Right rostral middle frontal gyrus     | -0.082 | 67.777  | 0.438 | 0.780 | 317 | 131 |
| Right lingual gyrus                    | -0.078 | 41.588  | 0.459 | 0.780 | 323 | 132 |
| Right supramarginal gyrus              | -0.077 | 51.399  | 0.480 | 0.797 | 303 | 125 |
| Right postcentral gyrus                | -0.072 | 43.123  | 0.507 | 0.821 | 309 | 125 |
| Right lateral orbitofrontal cortex     | -0.058 | 30.082  | 0.582 | 0.917 | 322 | 131 |
| Right superior parietal cortex         | -0.055 | 57.454  | 0.607 | 0.917 | 320 | 128 |
| Right isthmus cingulate cortex         | -0.055 | 14.630  | 0.605 | 0.917 | 322 | 128 |
| Right inferior parietal cortex         | -0.049 | 66.664  | 0.648 | 0.938 | 309 | 126 |
| Right caudal anterior cingulate cortex | -0.036 | 14.694  | 0.734 | 0.984 | 310 | 129 |
| Right entorhinal cortex                | -0.031 | 9.053   | 0.790 | 0.984 | 276 | 112 |
| Left supramarginal gyrus               | -0.028 | 50.817  | 0.797 | 0.984 | 299 | 126 |
| Left middle temporal gyrus             | -0.023 | 33.818  | 0.833 | 0.984 | 309 | 126 |
| Right pars orbitalis                   | -0.020 | 10.363  | 0.854 | 0.984 | 322 | 130 |
| Left pars opercularis                  | -0.018 | 27.089  | 0.870 | 0.984 | 319 | 128 |
| Left rostral middle frontal gyrus      | -0.018 | 67.004  | 0.864 | 0.984 | 321 | 132 |
| Right parahippocampal gyrus            | -0.017 | 10.586  | 0.876 | 0.984 | 317 | 127 |
| Right transverse temporal cortex       | -0.012 | 5.628   | 0.910 | 0.984 | 320 | 132 |
| Left isthmus cingulate cortex          | -0.012 | 16.434  | 0.908 | 0.984 | 322 | 129 |
| Left parahippocampal gyrus             | -0.007 | 11.530  | 0.950 | 0.984 | 317 | 129 |
| Left precentral gyrus                  | -0.005 | 45.462  | 0.961 | 0.984 | 313 | 127 |
| Right precentral gyrus                 | 0.002  | 43.547  | 0.984 | 0.984 | 312 | 125 |
| Left caudal middle frontal gyrus       | 0.003  | 38.504  | 0.980 | 0.984 | 321 | 130 |

|                                                |       |        |       |       |     |     |
|------------------------------------------------|-------|--------|-------|-------|-----|-----|
| <b>Left banks superior temporal sulcus</b>     | 0.009 | 17.922 | 0.933 | 0.984 | 297 | 125 |
| <b>Right inferior temporal cortex gyrus</b>    | 0.010 | 43.643 | 0.926 | 0.984 | 320 | 126 |
| <b>Left entorhinal cortex</b>                  | 0.011 | 8.511  | 0.924 | 0.984 | 287 | 118 |
| <b>Right caudal middle frontal gyrus</b>       | 0.026 | 37.164 | 0.805 | 0.984 | 318 | 129 |
| <b>Right pars opercularis</b>                  | 0.027 | 22.767 | 0.803 | 0.984 | 316 | 127 |
| <b>Left superior temporal gyrus</b>            | 0.030 | 38.769 | 0.782 | 0.984 | 304 | 125 |
| <b>Left pars triangularis</b>                  | 0.034 | 19.939 | 0.751 | 0.984 | 321 | 129 |
| <b>Right superior temporal gyrus</b>           | 0.052 | 35.683 | 0.633 | 0.935 | 298 | 126 |
| <b>Right banks superior temporal sulcus</b>    | 0.082 | 14.099 | 0.455 | 0.780 | 298 | 122 |
| <b>Right rostral anterior cingulate cortex</b> | 0.088 | 13.116 | 0.413 | 0.780 | 310 | 128 |
| <b>Left transverse temporal cortex</b>         | 0.090 | 7.167  | 0.392 | 0.762 | 322 | 131 |
| <b>Right frontal pole</b>                      | 0.108 | 4.938  | 0.308 | 0.654 | 319 | 132 |
| <b>Left inferior temporal cortex gyrus</b>     | 0.117 | 47.432 | 0.272 | 0.639 | 315 | 128 |
| <b>Left frontal pole</b>                       | 0.118 | 3.775  | 0.265 | 0.639 | 323 | 131 |
| <b>Left temporal pole</b>                      | 0.137 | 7.012  | 0.194 | 0.546 | 321 | 131 |
| <b>Right temporal pole</b>                     | 0.175 | 6.805  | 0.100 | 0.455 | 322 | 129 |

**TABLE S19b:** Full mega-analytic results for surface area of each structure for the pediatric OCD patients with no current comorbid anxiety compared with pediatric healthy controls, controlling for age, sex, scan center and ICV.

|                                    | <b>Cohen's d<sup>a</sup><br/>(NoCurAnx vs HC)</b> | <b>Standard Error</b> | <b>P-value</b> | <b>FDR P-value</b> | <b>N controls</b> | <b>N patients</b> |
|------------------------------------|---------------------------------------------------|-----------------------|----------------|--------------------|-------------------|-------------------|
| Left posterior cingulate cortex    | -0.266                                            | 14.628                | 0.002          | 0.089              | 320               | 242               |
| Right medial orbitofrontal cortex  | -0.257                                            | 16.527                | 0.003          | 0.089              | 319               | 237               |
| Left rostral middle frontal gyrus  | -0.249                                            | 52.827                | 0.004          | 0.089              | 321               | 244               |
| Left inferior parietal cortex      | -0.237                                            | 44.567                | 0.008          | 0.129              | 301               | 234               |
| Right paracentral lobule           | -0.209                                            | 18.077                | 0.016          | 0.209              | 323               | 243               |
| Right superior frontal gyrus       | -0.206                                            | 57.227                | 0.018          | 0.209              | 310               | 240               |
| Left middle temporal gyrus         | -0.191                                            | 28.169                | 0.030          | 0.253              | 309               | 234               |
| Left paracentral lobule            | -0.182                                            | 15.305                | 0.035          | 0.253              | 321               | 242               |
| Right posterior cingulate cortex   | -0.179                                            | 14.327                | 0.039          | 0.253              | 322               | 241               |
| Left lateral orbitofrontal cortex  | -0.176                                            | 23.015                | 0.041          | 0.253              | 324               | 244               |
| Left superior frontal gyrus        | -0.172                                            | 52.779                | 0.048          | 0.274              | 316               | 239               |
| Right rostral middle frontal gyrus | -0.163                                            | 55.680                | 0.059          | 0.306              | 317               | 243               |
| Left medial orbitofrontal cortex   | -0.160                                            | 19.235                | 0.064          | 0.306              | 320               | 242               |
| Right fusiform gyrus               | -0.159                                            | 30.442                | 0.068          | 0.306              | 314               | 242               |
| Right pars orbitalis               | -0.129                                            | 8.386                 | 0.134          | 0.537              | 322               | 244               |
| Right surface area                 | -0.129                                            | 439.487               | 0.132          | 1.000              | 324               | 245               |
| Right lateral occipital cortex     | -0.113                                            | 45.113                | 0.193          | 0.635              | 321               | 241               |
| Right pars triangularis            | -0.112                                            | 19.832                | 0.196          | 0.635              | 321               | 242               |
| Left surface area                  | -0.108                                            | 429.502               | 0.210          | 1.000              | 324               | 245               |
| Right superior parietal cortex     | -0.104                                            | 48.347                | 0.228          | 0.705              | 320               | 244               |
| Left precentral gyrus              | -0.100                                            | 35.872                | 0.249          | 0.735              | 313               | 241               |
| Left insula                        | -0.096                                            | 18.429                | 0.273          | 0.773              | 315               | 237               |
| Right inferior parietal cortex     | -0.091                                            | 52.405                | 0.302          | 0.791              | 309               | 236               |
| Right lateral orbitofrontal cortex | -0.090                                            | 24.083                | 0.295          | 0.791              | 322               | 244               |
| Left pars orbitalis                | -0.084                                            | 6.989                 | 0.331          | 0.798              | 322               | 243               |

|                                         |        |        |       |       |     |     |
|-----------------------------------------|--------|--------|-------|-------|-----|-----|
| Right lingual gyrus                     | -0.083 | 33.530 | 0.333 | 0.798 | 323 | 244 |
| Left cuneus                             | -0.082 | 16.742 | 0.344 | 0.798 | 320 | 243 |
| Left caudal middle frontal gyrus        | -0.080 | 30.620 | 0.352 | 0.798 | 321 | 245 |
| Left superior parietal cortex           | -0.076 | 48.470 | 0.381 | 0.809 | 317 | 242 |
| Left pars opercularis                   | -0.074 | 21.811 | 0.395 | 0.813 | 319 | 241 |
| Left frontal pole                       | -0.066 | 3.082  | 0.445 | 0.855 | 323 | 244 |
| Right postcentral gyrus                 | -0.056 | 34.574 | 0.525 | 0.901 | 309 | 239 |
| Right precentral gyrus                  | -0.054 | 35.472 | 0.535 | 0.901 | 312 | 241 |
| Left postcentral gyrus                  | -0.053 | 36.737 | 0.548 | 0.901 | 312 | 236 |
| Right pars opercularis                  | -0.053 | 18.289 | 0.543 | 0.901 | 316 | 243 |
| Right rostral anterior cingulate cortex | -0.053 | 10.555 | 0.542 | 0.901 | 310 | 240 |
| Right cuneus                            | -0.050 | 17.345 | 0.565 | 0.901 | 323 | 241 |
| Left inferior temporal cortex gyrus     | -0.047 | 38.535 | 0.586 | 0.901 | 315 | 240 |
| Left pericalcarine gyrus                | -0.046 | 19.259 | 0.595 | 0.901 | 320 | 242 |
| Right caudal middle frontal gyrus       | -0.040 | 30.317 | 0.648 | 0.909 | 318 | 241 |
| Right temporal pole                     | -0.039 | 5.504  | 0.650 | 0.909 | 322 | 241 |
| Right superior temporal gyrus           | -0.038 | 28.715 | 0.669 | 0.909 | 298 | 232 |
| Right parahippocampal gyrus             | -0.038 | 8.475  | 0.658 | 0.909 | 317 | 241 |
| Left caudal anterior cingulate cortex   | -0.029 | 11.612 | 0.739 | 0.947 | 316 | 237 |
| Left superior temporal gyrus            | -0.027 | 31.699 | 0.764 | 0.947 | 304 | 226 |
| Left precuneus                          | -0.026 | 34.108 | 0.766 | 0.947 | 320 | 243 |
| Right supramarginal gyrus               | -0.020 | 41.171 | 0.821 | 0.968 | 303 | 233 |
| Right insula                            | -0.017 | 19.106 | 0.842 | 0.968 | 312 | 237 |
| Left fusiform gyrus                     | -0.008 | 31.342 | 0.923 | 0.984 | 314 | 243 |
| Right banks superior temporal sulcus    | -0.007 | 11.575 | 0.939 | 0.984 | 298 | 232 |
| Left entorhinal cortex                  | -0.003 | 6.682  | 0.976 | 0.991 | 287 | 228 |
| Left rostral anterior cingulate cortex  | -0.001 | 12.450 | 0.991 | 0.991 | 316 | 237 |
| Left banks superior temporal sulcus     | 0.001  | 14.926 | 0.989 | 0.991 | 297 | 215 |
| Left transverse temporal cortex         | 0.006  | 6.007  | 0.941 | 0.984 | 322 | 243 |

|                                        |       |        |       |       |     |     |
|----------------------------------------|-------|--------|-------|-------|-----|-----|
| Right inferior temporal cortex gyrus   | 0.007 | 35.037 | 0.936 | 0.984 | 320 | 239 |
| Right middle temporal gyrus            | 0.008 | 31.252 | 0.930 | 0.984 | 307 | 234 |
| Right pericalcarine gyrus              | 0.016 | 21.137 | 0.854 | 0.968 | 323 | 240 |
| Right precuneus                        | 0.017 | 36.334 | 0.843 | 0.968 | 324 | 241 |
| Left lingual gyrus                     | 0.022 | 33.659 | 0.798 | 0.968 | 321 | 242 |
| Right caudal anterior cingulate cortex | 0.031 | 12.097 | 0.720 | 0.944 | 310 | 242 |
| Left pars triangularis                 | 0.031 | 15.949 | 0.722 | 0.944 | 321 | 244 |
| Right isthmus cingulate cortex         | 0.044 | 11.470 | 0.610 | 0.902 | 322 | 242 |
| Left lateral occipital cortex          | 0.046 | 42.815 | 0.596 | 0.901 | 319 | 242 |
| Left parahippocampal gyrus             | 0.065 | 9.253  | 0.453 | 0.855 | 317 | 241 |
| Right entorhinal cortex                | 0.075 | 7.159  | 0.421 | 0.842 | 276 | 214 |
| Left supramarginal gyrus               | 0.079 | 41.636 | 0.375 | 0.809 | 299 | 228 |
| Right transverse temporal cortex       | 0.114 | 4.939  | 0.186 | 0.635 | 320 | 244 |
| Left temporal pole                     | 0.118 | 5.650  | 0.175 | 0.635 | 321 | 239 |
| Left isthmus cingulate cortex          | 0.143 | 13.180 | 0.099 | 0.421 | 322 | 242 |
| Right frontal pole                     | 0.179 | 3.945  | 0.039 | 0.253 | 319 | 244 |



**TABLE S19c:** Full mega-analytic results for surface area of each structure for the pediatric OCD patients with current comorbid anxiety compared with pediatric patients without, controlling for age, sex, scan center and ICV.

|                                        | <b>Cohen's d<sup>a</sup><br/>(NoCurAnx vs CurAnx)</b> | <b>Standard Error</b> | <b>P-value</b> | <b>FDR P-value</b> | <b>N patients with<br/>current anxiety</b> | <b>N patients with no<br/>current anxiety</b> |
|----------------------------------------|-------------------------------------------------------|-----------------------|----------------|--------------------|--------------------------------------------|-----------------------------------------------|
| Left rostral anterior cingulate cortex | -0.226                                                | 17.100                | 0.044          | 0.804              | 128                                        | 237                                           |
| Right cuneus                           | -0.225                                                | 21.995                | 0.044          | 0.804              | 130                                        | 241                                           |
| Right pericalcarine gyrus              | -0.223                                                | 25.437                | 0.044          | 0.804              | 132                                        | 240                                           |
| Left caudal anterior cingulate cortex  | -0.191                                                | 15.122                | 0.088          | 0.804              | 129                                        | 237                                           |
| Right insula                           | -0.191                                                | 25.398                | 0.089          | 0.804              | 127                                        | 237                                           |
| Left precuneus                         | -0.186                                                | 45.869                | 0.095          | 0.804              | 130                                        | 243                                           |
| Right precuneus                        | -0.162                                                | 48.081                | 0.146          | 0.838              | 129                                        | 241                                           |
| Left isthmus cingulate cortex          | -0.154                                                | 17.926                | 0.167          | 0.838              | 129                                        | 242                                           |
| Left postcentral gyrus                 | -0.152                                                | 47.637                | 0.180          | 0.838              | 126                                        | 236                                           |
| Right entorhinal cortex                | -0.137                                                | 9.054                 | 0.253          | 0.838              | 112                                        | 214                                           |
| Left insula                            | -0.133                                                | 24.095                | 0.232          | 0.838              | 130                                        | 237                                           |
| Left pars orbitalis                    | -0.132                                                | 8.835                 | 0.235          | 0.838              | 130                                        | 243                                           |
| Right supramarginal gyrus              | -0.126                                                | 54.026                | 0.268          | 0.838              | 125                                        | 233                                           |
| Right frontal pole                     | -0.120                                                | 4.774                 | 0.277          | 0.838              | 132                                        | 244                                           |
| Left pericalcarine gyrus               | -0.117                                                | 25.171                | 0.294          | 0.838              | 130                                        | 242                                           |
| Right transverse temporal cortex       | -0.117                                                | 6.879                 | 0.288          | 0.838              | 132                                        | 244                                           |
| Left lingual gyrus                     | -0.114                                                | 43.648                | 0.306          | 0.838              | 131                                        | 242                                           |
| Left medial orbitofrontal cortex       | -0.112                                                | 25.554                | 0.315          | 0.838              | 129                                        | 242                                           |
| Right middle temporal gyrus            | -0.111                                                | 41.059                | 0.327          | 0.838              | 127                                        | 234                                           |
| Right paracentral lobule               | -0.108                                                | 23.803                | 0.333          | 0.838              | 130                                        | 243                                           |
| Left supramarginal gyrus               | -0.106                                                | 57.460                | 0.350          | 0.850              | 126                                        | 228                                           |
| Left fusiform gyrus                    | -0.096                                                | 41.878                | 0.387          | 0.869              | 130                                        | 243                                           |
| Right pars triangularis                | -0.091                                                | 24.715                | 0.412          | 0.869              | 130                                        | 242                                           |
| Right posterior cingulate cortex       | -0.087                                                | 18.312                | 0.434          | 0.869              | 130                                        | 241                                           |
| Right lateral occipital cortex         | -0.086                                                | 57.689                | 0.439          | 0.869              | 131                                        | 241                                           |

|                                        |        |         |       |       |     |     |
|----------------------------------------|--------|---------|-------|-------|-----|-----|
| Left lateral occipital cortex          | -0.084 | 55.667  | 0.451 | 0.869 | 130 | 242 |
| Right caudal anterior cingulate cortex | -0.081 | 15.164  | 0.469 | 0.869 | 129 | 242 |
| Left lateral orbitofrontal cortex      | -0.068 | 32.949  | 0.537 | 0.908 | 132 | 244 |
| Right isthmus cingulate cortex         | -0.067 | 15.748  | 0.547 | 0.908 | 128 | 242 |
| Left pars triangularis                 | -0.060 | 20.907  | 0.588 | 0.931 | 129 | 244 |
| Right superior frontal gyrus           | -0.057 | 76.678  | 0.611 | 0.936 | 127 | 240 |
| Right surface area                     | -0.052 | 596.307 | 0.636 | 1.000 | 132 | 245 |
| Right lateral orbitofrontal cortex     | -0.046 | 32.388  | 0.680 | 0.936 | 131 | 244 |
| Left banks superior temporal sulcus    | -0.044 | 19.056  | 0.701 | 0.936 | 125 | 215 |
| Left surface area                      | -0.042 | 592.228 | 0.703 | 1.000 | 132 | 245 |
| Left superior parietal cortex          | -0.037 | 66.481  | 0.741 | 0.936 | 131 | 242 |
| Left posterior cingulate cortex        | -0.033 | 19.144  | 0.767 | 0.936 | 129 | 242 |
| Left paracentral lobule                | -0.030 | 19.303  | 0.788 | 0.936 | 131 | 242 |
| Right pars orbitalis                   | -0.025 | 10.780  | 0.820 | 0.936 | 130 | 244 |
| Left cuneus                            | -0.023 | 21.669  | 0.836 | 0.936 | 130 | 243 |
| Left inferior parietal cortex          | -0.022 | 60.560  | 0.847 | 0.936 | 121 | 234 |
| Left parahippocampal gyrus             | -0.018 | 11.698  | 0.870 | 0.936 | 129 | 241 |
| Right fusiform gyrus                   | -0.015 | 39.188  | 0.895 | 0.936 | 130 | 242 |
| Right inferior temporal cortex gyrus   | -0.015 | 47.328  | 0.892 | 0.936 | 126 | 239 |
| Left superior frontal gyrus            | -0.011 | 68.984  | 0.923 | 0.951 | 129 | 239 |
| Right superior parietal cortex         | -0.007 | 64.393  | 0.950 | 0.964 | 128 | 244 |
| Right inferior parietal cortex         | -0.002 | 70.667  | 0.986 | 0.986 | 126 | 236 |
| Right pars opercularis                 | 0.019  | 23.987  | 0.863 | 0.936 | 127 | 243 |
| Right postcentral gyrus                | 0.020  | 46.888  | 0.859 | 0.936 | 125 | 239 |
| Left superior temporal gyrus           | 0.024  | 42.332  | 0.832 | 0.936 | 125 | 226 |
| Right rostral middle frontal gyrus     | 0.024  | 72.805  | 0.830 | 0.936 | 131 | 243 |
| Right superior temporal gyrus          | 0.025  | 38.478  | 0.826 | 0.936 | 126 | 232 |
| Right medial orbitofrontal cortex      | 0.030  | 21.316  | 0.785 | 0.936 | 130 | 237 |
| Left pars opercularis                  | 0.045  | 29.022  | 0.685 | 0.936 | 128 | 241 |

|                                         |       |        |       |       |     |     |
|-----------------------------------------|-------|--------|-------|-------|-----|-----|
| Right lingual gyrus                     | 0.046 | 42.565 | 0.680 | 0.936 | 132 | 244 |
| Left entorhinal cortex                  | 0.049 | 8.970  | 0.670 | 0.936 | 118 | 228 |
| Right precentral gyrus                  | 0.050 | 46.448 | 0.659 | 0.936 | 125 | 241 |
| Right parahippocampal gyrus             | 0.063 | 12.016 | 0.575 | 0.931 | 127 | 241 |
| Left temporal pole                      | 0.067 | 7.379  | 0.544 | 0.908 | 131 | 239 |
| Right caudal middle frontal gyrus       | 0.078 | 38.974 | 0.486 | 0.869 | 129 | 241 |
| Right banks superior temporal sulcus    | 0.080 | 15.682 | 0.485 | 0.869 | 122 | 232 |
| Left precentral gyrus                   | 0.088 | 46.544 | 0.431 | 0.869 | 127 | 241 |
| Left middle temporal gyrus              | 0.100 | 39.563 | 0.375 | 0.869 | 126 | 234 |
| Right rostral anterior cingulate cortex | 0.116 | 14.456 | 0.302 | 0.838 | 128 | 240 |
| Left inferior temporal cortex gyrus     | 0.118 | 47.963 | 0.293 | 0.838 | 128 | 240 |
| Left rostral middle frontal gyrus       | 0.128 | 68.433 | 0.245 | 0.838 | 132 | 244 |
| Left caudal middle frontal gyrus        | 0.157 | 38.100 | 0.157 | 0.838 | 130 | 245 |
| Left transverse temporal cortex         | 0.175 | 7.761  | 0.115 | 0.838 | 131 | 243 |
| Left frontal pole                       | 0.189 | 4.240  | 0.088 | 0.804 | 131 | 244 |
| Right temporal pole                     | 0.193 | 6.812  | 0.084 | 0.804 | 129 | 241 |

**TABLE S20:** Full mega-analytic results for surface area of each structure for the pediatric OCD patients with ordering/symmetry symptoms compared with pediatric patients without, controlling for age, sex, scan center and ICV.

|                                         | <b>Cohen's d<sup>a</sup><br/>(NoOrd vs Ord)</b> | <b>Standard Error</b> | <b>P-value</b> | <b>FDR P-value</b> | <b>N patients with<br/>ordering/symmetry<br/>symptoms</b> | <b>N patients with no<br/>ordering /symmetry<br/>symptoms</b> |
|-----------------------------------------|-------------------------------------------------|-----------------------|----------------|--------------------|-----------------------------------------------------------|---------------------------------------------------------------|
| Right entorhinal cortex                 | -0.282                                          | 10.803                | 0.068          | 0.287              | 169                                                       | 63                                                            |
| Right frontal pole                      | -0.268                                          | 5.534                 | 0.063          | 0.286              | 194                                                       | 71                                                            |
| Left rostral anterior cingulate cortex  | -0.238                                          | 21.288                | 0.100          | 0.311              | 194                                                       | 70                                                            |
| Left precentral gyrus                   | -0.165                                          | 52.712                | 0.252          | 0.522              | 191                                                       | 71                                                            |
| Right caudal anterior cingulate cortex  | -0.162                                          | 18.567                | 0.262          | 0.522              | 194                                                       | 70                                                            |
| Right posterior cingulate cortex        | -0.160                                          | 21.911                | 0.268          | 0.522              | 191                                                       | 70                                                            |
| Right pars opercularis                  | -0.153                                          | 29.082                | 0.287          | 0.535              | 194                                                       | 71                                                            |
| Right banks superior temporal sulcus    | -0.135                                          | 18.288                | 0.356          | 0.621              | 188                                                       | 68                                                            |
| Left pars orbitalis                     | -0.114                                          | 10.608                | 0.428          | 0.676              | 192                                                       | 71                                                            |
| Left banks superior temporal sulcus     | -0.098                                          | 23.355                | 0.516          | 0.753              | 178                                                       | 65                                                            |
| Left paracentral lobule                 | -0.092                                          | 22.591                | 0.521          | 0.753              | 194                                                       | 71                                                            |
| Left isthmus cingulate cortex           | -0.090                                          | 21.680                | 0.534          | 0.757              | 192                                                       | 70                                                            |
| Right paracentral lobule                | -0.073                                          | 28.166                | 0.612          | 0.817              | 192                                                       | 70                                                            |
| Right precentral gyrus                  | -0.062                                          | 53.219                | 0.669          | 0.867              | 192                                                       | 71                                                            |
| Left lateral orbitofrontal cortex       | -0.059                                          | 39.250                | 0.684          | 0.867              | 195                                                       | 70                                                            |
| Left frontal pole                       | -0.045                                          | 4.964                 | 0.756          | 0.873              | 193                                                       | 71                                                            |
| Right middle temporal gyrus             | -0.045                                          | 49.531                | 0.754          | 0.873              | 191                                                       | 70                                                            |
| Left superior frontal gyrus             | -0.031                                          | 82.827                | 0.827          | 0.922              | 195                                                       | 71                                                            |
| Left medial orbitofrontal cortex        | -0.011                                          | 30.626                | 0.940          | 0.962              | 193                                                       | 70                                                            |
| Right medial orbitofrontal cortex       | -0.009                                          | 26.416                | 0.949          | 0.962              | 190                                                       | 71                                                            |
| Right rostral anterior cingulate cortex | 0.007                                           | 17.365                | 0.962          | 0.962              | 194                                                       | 71                                                            |
| Left transverse temporal cortex         | 0.008                                           | 9.861                 | 0.958          | 0.962              | 192                                                       | 71                                                            |
| Right pars triangularis                 | 0.014                                           | 29.817                | 0.924          | 0.962              | 195                                                       | 71                                                            |
| Right temporal pole                     | 0.015                                           | 7.454                 | 0.919          | 0.962              | 192                                                       | 71                                                            |

|                                       |       |        |       |       |     |    |
|---------------------------------------|-------|--------|-------|-------|-----|----|
| Left posterior cingulate cortex       | 0.025 | 22.625 | 0.862 | 0.945 | 192 | 70 |
| Left caudal anterior cingulate cortex | 0.040 | 17.895 | 0.782 | 0.886 | 190 | 70 |
| Left caudal middle frontal gyrus      | 0.045 | 46.659 | 0.757 | 0.873 | 195 | 70 |
| Left insula                           | 0.049 | 29.361 | 0.733 | 0.873 | 194 | 71 |
| Right inferior parietal cortex        | 0.055 | 85.500 | 0.703 | 0.870 | 190 | 71 |
| Right lateral orbitofrontal cortex    | 0.058 | 38.183 | 0.688 | 0.867 | 194 | 70 |
| Left middle temporal gyrus            | 0.083 | 46.175 | 0.569 | 0.774 | 189 | 68 |
| Right parahippocampal gyrus           | 0.088 | 14.057 | 0.551 | 0.764 | 192 | 67 |
| Left superior temporal gyrus          | 0.111 | 51.679 | 0.449 | 0.678 | 187 | 69 |
| Right cuneus                          | 0.112 | 27.130 | 0.438 | 0.678 | 194 | 70 |
| Left postcentral gyrus                | 0.114 | 57.114 | 0.427 | 0.676 | 191 | 71 |
| Left rostral middle frontal gyrus     | 0.117 | 84.136 | 0.417 | 0.676 | 195 | 71 |
| Right pars orbitalis                  | 0.120 | 13.197 | 0.403 | 0.676 | 195 | 71 |
| Right postcentral gyrus               | 0.150 | 56.383 | 0.299 | 0.535 | 189 | 71 |
| Left supramarginal gyrus              | 0.151 | 68.202 | 0.295 | 0.535 | 191 | 71 |
| Right isthmus cingulate cortex        | 0.160 | 18.275 | 0.268 | 0.522 | 191 | 70 |
| Right superior frontal gyrus          | 0.160 | 90.096 | 0.265 | 0.522 | 195 | 71 |
| Right rostral middle frontal gyrus    | 0.168 | 90.058 | 0.242 | 0.522 | 194 | 71 |
| Right fusiform gyrus                  | 0.180 | 46.373 | 0.210 | 0.492 | 193 | 71 |
| Left superior parietal cortex         | 0.182 | 79.185 | 0.207 | 0.492 | 195 | 70 |
| Left parahippocampal gyrus            | 0.194 | 13.740 | 0.189 | 0.475 | 194 | 66 |
| Right precuneus                       | 0.202 | 57.296 | 0.166 | 0.433 | 193 | 69 |
| Left inferior parietal cortex         | 0.216 | 71.245 | 0.138 | 0.376 | 191 | 69 |
| Left inferior temporal cortex gyrus   | 0.220 | 56.865 | 0.126 | 0.356 | 195 | 71 |
| Right insula                          | 0.222 | 28.258 | 0.123 | 0.356 | 193 | 71 |
| Left temporal pole                    | 0.242 | 7.998  | 0.093 | 0.309 | 192 | 71 |
| Right lateral occipital cortex        | 0.251 | 66.433 | 0.083 | 0.296 | 193 | 70 |
| Left entorhinal cortex                | 0.252 | 10.121 | 0.096 | 0.309 | 182 | 64 |
| Right superior temporal gyrus         | 0.254 | 43.530 | 0.080 | 0.296 | 192 | 70 |

|                                      |       |         |       |       |     |    |
|--------------------------------------|-------|---------|-------|-------|-----|----|
| Right supramarginal gyrus            | 0.254 | 63.753  | 0.080 | 0.296 | 187 | 71 |
| Right surface area                   | 0.260 | 724.374 | 0.070 | 1.000 | 195 | 71 |
| Left surface area                    | 0.267 | 706.432 | 0.064 | 1.000 | 195 | 71 |
| Left pars opercularis                | 0.274 | 31.459  | 0.059 | 0.286 | 193 | 70 |
| Right transverse temporal cortex     | 0.279 | 7.770   | 0.053 | 0.275 | 195 | 71 |
| Right caudal middle frontal gyrus    | 0.287 | 46.347  | 0.047 | 0.264 | 193 | 71 |
| Right inferior temporal cortex gyrus | 0.289 | 54.366  | 0.045 | 0.264 | 193 | 71 |
| Left pars triangularis               | 0.299 | 24.494  | 0.038 | 0.257 | 195 | 71 |
| Left lateral occipital cortex        | 0.300 | 64.031  | 0.037 | 0.257 | 194 | 71 |
| Left lingual gyrus                   | 0.310 | 50.442  | 0.033 | 0.257 | 193 | 70 |
| Left precuneus                       | 0.349 | 54.784  | 0.016 | 0.158 | 194 | 70 |
| Right pericalcarine gyrus            | 0.358 | 29.813  | 0.014 | 0.157 | 192 | 70 |
| Left pericalcarine gyrus             | 0.371 | 29.503  | 0.011 | 0.145 | 194 | 70 |
| Right superior parietal cortex       | 0.371 | 76.274  | 0.011 | 0.145 | 195 | 70 |
| Left fusiform gyrus                  | 0.377 | 48.410  | 0.009 | 0.145 | 194 | 71 |
| Right lingual gyrus                  | 0.397 | 48.535  | 0.006 | 0.145 | 195 | 70 |
| Left cuneus                          | 0.494 | 24.862  | 0.001 | 0.045 | 195 | 71 |

**TABLE S21a:** Full mega-analytic results for cortical thickness of each structure for the adult onset OCD patients compared with adult healthy controls, controlling for age, sex and scan center.

|                                     | <b>Cohen's d<sup>a</sup><br/>(Adult-onset vs HC)</b> | <b>Standard Error</b> | <b>P-value</b> | <b>FDR P-value</b> | <b>N controls</b> | <b>N patients</b> |
|-------------------------------------|------------------------------------------------------|-----------------------|----------------|--------------------|-------------------|-------------------|
| Left precuneus                      | -0.160                                               | 0.006                 | 3.921E-04      | 0.017              | 1426              | 772               |
| Left inferior parietal cortex       | -0.158                                               | 0.006                 | 0.001          | 0.017              | 1364              | 745               |
| Right medial orbitofrontal cortex   | -0.150                                               | 0.009                 | 0.001          | 0.017              | 1428              | 766               |
| Left pars opercularis               | -0.149                                               | 0.007                 | 0.001          | 0.017              | 1427              | 770               |
| Left cortical thickness             | -0.143                                               | 0.005                 | 0.001          | 0.020              | 1435              | 773               |
| Right inferior parietal cortex      | -0.138                                               | 0.006                 | 0.002          | 0.027              | 1379              | 755               |
| Left fusiform gyrus                 | -0.135                                               | 0.007                 | 0.003          | 0.027              | 1428              | 769               |
| Left rostral middle frontal gyrus   | -0.128                                               | 0.006                 | 0.005          | 0.036              | 1429              | 766               |
| Left caudal middle frontal gyrus    | -0.128                                               | 0.007                 | 0.005          | 0.036              | 1429              | 766               |
| Right cortical thickness            | -0.126                                               | 0.005                 | 0.005          | 0.036              | 1435              | 771               |
| Right lingual gyrus                 | -0.123                                               | 0.006                 | 0.006          | 0.040              | 1433              | 771               |
| Right caudal middle frontal gyrus   | -0.122                                               | 0.007                 | 0.007          | 0.041              | 1423              | 767               |
| Right rostral middle frontal gyrus  | -0.118                                               | 0.006                 | 0.009          | 0.045              | 1424              | 770               |
| Left superior frontal gyrus         | -0.118                                               | 0.007                 | 0.010          | 0.045              | 1413              | 741               |
| Right pars opercularis              | -0.117                                               | 0.008                 | 0.010          | 0.045              | 1418              | 760               |
| Left middle temporal gyrus          | -0.116                                               | 0.008                 | 0.014          | 0.051              | 1320              | 701               |
| Right posterior cingulate cortex    | -0.115                                               | 0.008                 | 0.010          | 0.045              | 1427              | 773               |
| Right middle temporal gyrus         | -0.114                                               | 0.007                 | 0.012          | 0.049              | 1402              | 754               |
| Right precuneus                     | -0.112                                               | 0.006                 | 0.013          | 0.049              | 1429              | 768               |
| Left posterior cingulate cortex     | -0.109                                               | 0.008                 | 0.015          | 0.053              | 1431              | 771               |
| Right pars triangularis             | -0.107                                               | 0.008                 | 0.018          | 0.060              | 1423              | 759               |
| Left medial orbitofrontal cortex    | -0.102                                               | 0.008                 | 0.023          | 0.073              | 1430              | 770               |
| Right lateral orbitofrontal cortex  | -0.101                                               | 0.008                 | 0.025          | 0.077              | 1431              | 772               |
| Left lateral orbitofrontal cortex   | -0.100                                               | 0.008                 | 0.026          | 0.077              | 1433              | 770               |
| Left banks superior temporal sulcus | -0.097                                               | 0.008                 | 0.040          | 0.107              | 1284              | 701               |

|                                        |        |       |       |       |      |     |
|----------------------------------------|--------|-------|-------|-------|------|-----|
| Left supramarginal gyrus               | -0.094 | 0.007 | 0.046 | 0.115 | 1310 | 711 |
| Right insula                           | -0.094 | 0.009 | 0.039 | 0.107 | 1415 | 751 |
| Left lingual gyrus                     | -0.091 | 0.006 | 0.043 | 0.112 | 1427 | 769 |
| Left inferior temporal cortex gyrus    | -0.088 | 0.008 | 0.053 | 0.129 | 1383 | 763 |
| Right pars orbitalis                   | -0.084 | 0.010 | 0.062 | 0.140 | 1431 | 773 |
| Right caudal anterior cingulate cortex | -0.084 | 0.012 | 0.062 | 0.140 | 1422 | 764 |
| Right fusiform gyrus                   | -0.082 | 0.007 | 0.072 | 0.149 | 1428 | 758 |
| Right lateral occipital cortex         | -0.081 | 0.006 | 0.073 | 0.149 | 1421 | 762 |
| Left isthmus cingulate cortex          | -0.081 | 0.010 | 0.070 | 0.149 | 1431 | 772 |
| Left superior parietal cortex          | -0.080 | 0.006 | 0.076 | 0.149 | 1417 | 759 |
| Right parahippocampal gyrus            | -0.079 | 0.012 | 0.079 | 0.149 | 1420 | 771 |
| Left lateral occipital cortex          | -0.077 | 0.006 | 0.089 | 0.164 | 1419 | 763 |
| Right isthmus cingulate cortex         | -0.073 | 0.009 | 0.107 | 0.188 | 1429 | 773 |
| Left pars triangularis                 | -0.072 | 0.007 | 0.108 | 0.188 | 1434 | 770 |
| Right superior frontal gyrus           | -0.070 | 0.007 | 0.122 | 0.208 | 1410 | 760 |
| Left parahippocampal gyrus             | -0.069 | 0.014 | 0.127 | 0.211 | 1424 | 770 |
| Right precentral gyrus                 | -0.068 | 0.006 | 0.134 | 0.213 | 1405 | 754 |
| Left pars orbitalis                    | -0.067 | 0.010 | 0.134 | 0.213 | 1431 | 770 |
| Left rostral anterior cingulate cortex | -0.067 | 0.012 | 0.137 | 0.213 | 1415 | 757 |
| Right inferior temporal cortex gyrus   | -0.065 | 0.008 | 0.148 | 0.225 | 1400 | 767 |
| Left insula                            | -0.064 | 0.008 | 0.161 | 0.241 | 1414 | 757 |
| Left cuneus                            | -0.058 | 0.006 | 0.201 | 0.285 | 1404 | 757 |
| Right superior parietal cortex         | -0.057 | 0.006 | 0.208 | 0.285 | 1411 | 759 |
| Left frontal pole                      | -0.057 | 0.015 | 0.203 | 0.285 | 1435 | 771 |
| Left precentral gyrus                  | -0.057 | 0.006 | 0.206 | 0.285 | 1408 | 762 |
| Left postcentral gyrus                 | -0.053 | 0.006 | 0.241 | 0.324 | 1403 | 757 |
| Right transverse temporal cortex       | -0.052 | 0.010 | 0.249 | 0.330 | 1434 | 772 |
| Left caudal anterior cingulate cortex  | -0.048 | 0.014 | 0.293 | 0.379 | 1415 | 756 |
| Right cuneus                           | -0.044 | 0.007 | 0.330 | 0.420 | 1401 | 756 |



|                                         |        |       |       |       |      |     |
|-----------------------------------------|--------|-------|-------|-------|------|-----|
| Right supramarginal gyrus               | -0.032 | 0.007 | 0.490 | 0.612 | 1321 | 732 |
| Right rostral anterior cingulate cortex | -0.026 | 0.012 | 0.571 | 0.678 | 1413 | 760 |
| Left pericalcarine gyrus                | -0.025 | 0.006 | 0.588 | 0.678 | 1406 | 765 |
| Left paracentral lobule                 | -0.025 | 0.007 | 0.585 | 0.678 | 1430 | 769 |
| Left superior temporal gyrus            | -0.020 | 0.008 | 0.668 | 0.731 | 1296 | 690 |
| Right pericalcarine gyrus               | -0.020 | 0.006 | 0.652 | 0.731 | 1409 | 763 |
| Right postcentral gyrus                 | -0.019 | 0.006 | 0.668 | 0.731 | 1414 | 764 |
| Right frontal pole                      | -0.016 | 0.014 | 0.717 | 0.761 | 1434 | 773 |
| Left transverse temporal cortex         | -0.014 | 0.010 | 0.763 | 0.797 | 1433 | 771 |
| Right banks superior temporal sulcus    | -0.010 | 0.008 | 0.827 | 0.851 | 1321 | 726 |
| Right paracentral lobule                | -0.003 | 0.007 | 0.948 | 0.962 | 1432 | 773 |
| Left entorhinal cortex                  | 0.002  | 0.018 | 0.970 | 0.970 | 1318 | 717 |
| Right temporal pole                     | 0.018  | 0.018 | 0.683 | 0.736 | 1430 | 759 |
| Right superior temporal gyrus           | 0.025  | 0.008 | 0.591 | 0.678 | 1316 | 722 |
| Left temporal pole                      | 0.026  | 0.017 | 0.556 | 0.678 | 1435 | 770 |
| Right entorhinal cortex                 | 0.085  | 0.020 | 0.077 | 0.149 | 1244 | 685 |

**TABLE S21b:** Full mega-analytic results for cortical thickness of each structure for the childhood onset OCD patients compared with adult healthy controls, controlling for age, sex and scan center.

|                                        | <b>Cohen's d<sup>a</sup><br/>(Childhood-onset vs HC)</b> | <b>Standard Error</b> | <b>P-value</b> | <b>FDR P-value</b> | <b>N controls</b> | <b>N patients</b> |
|----------------------------------------|----------------------------------------------------------|-----------------------|----------------|--------------------|-------------------|-------------------|
| Left inferior parietal cortex          | -0.153                                                   | 0.006                 | 0.002          | 0.057              | 1364              | 613               |
| Right inferior parietal cortex         | -0.148                                                   | 0.006                 | 0.002          | 0.057              | 1379              | 621               |
| Right lateral orbitofrontal cortex     | -0.146                                                   | 0.008                 | 0.002          | 0.057              | 1431              | 646               |
| Left entorhinal cortex                 | -0.142                                                   | 0.019                 | 0.004          | 0.072              | 1318              | 590               |
| Left lateral orbitofrontal cortex      | -0.134                                                   | 0.008                 | 0.005          | 0.072              | 1433              | 645               |
| Left isthmus cingulate cortex          | -0.100                                                   | 0.010                 | 0.037          | 0.331              | 1431              | 641               |
| Right precuneus                        | -0.096                                                   | 0.006                 | 0.045          | 0.331              | 1429              | 644               |
| Left rostral anterior cingulate cortex | -0.095                                                   | 0.012                 | 0.049          | 0.331              | 1415              | 637               |
| Left rostral middle frontal gyrus      | -0.095                                                   | 0.007                 | 0.047          | 0.331              | 1429              | 641               |
| Right fusiform gyrus                   | -0.090                                                   | 0.007                 | 0.062          | 0.331              | 1428              | 633               |
| Right rostral middle frontal gyrus     | -0.089                                                   | 0.007                 | 0.062          | 0.331              | 1424              | 644               |
| Left cortical thickness                | -0.088                                                   | 0.005                 | 0.066          | 0.331              | 1435              | 646               |
| Left fusiform gyrus                    | -0.088                                                   | 0.007                 | 0.066          | 0.331              | 1428              | 641               |
| Right isthmus cingulate cortex         | -0.085                                                   | 0.009                 | 0.074          | 0.344              | 1429              | 645               |
| Left middle temporal gyrus             | -0.079                                                   | 0.008                 | 0.112          | 0.398              | 1320              | 600               |
| Right lateral occipital cortex         | -0.078                                                   | 0.007                 | 0.103          | 0.398              | 1421              | 641               |
| Right parahippocampal gyrus            | -0.077                                                   | 0.013                 | 0.110          | 0.398              | 1420              | 640               |
| Left frontal pole                      | -0.077                                                   | 0.015                 | 0.109          | 0.398              | 1435              | 642               |
| Left lateral occipital cortex          | -0.076                                                   | 0.007                 | 0.114          | 0.398              | 1419              | 640               |
| Right entorhinal cortex                | -0.073                                                   | 0.020                 | 0.152          | 0.476              | 1244              | 579               |
| Left insula                            | -0.071                                                   | 0.008                 | 0.139          | 0.463              | 1414              | 637               |
| Left inferior temporal cortex gyrus    | -0.069                                                   | 0.008                 | 0.156          | 0.476              | 1383              | 629               |
| Right middle temporal gyrus            | -0.066                                                   | 0.007                 | 0.170          | 0.480              | 1402              | 634               |
| Right cortical thickness               | -0.065                                                   | 0.005                 | 0.171          | 0.480              | 1435              | 645               |
| Left precuneus                         | -0.059                                                   | 0.006                 | 0.214          | 0.556              | 1426              | 643               |

|                                        |        |       |       |       |      |     |
|----------------------------------------|--------|-------|-------|-------|------|-----|
| Left caudal middle frontal gyrus       | -0.058 | 0.007 | 0.224 | 0.560 | 1429 | 634 |
| Left medial orbitofrontal cortex       | -0.056 | 0.008 | 0.241 | 0.582 | 1430 | 641 |
| Left banks superior temporal sulcus    | -0.054 | 0.009 | 0.281 | 0.593 | 1284 | 590 |
| Left pars orbitalis                    | -0.051 | 0.011 | 0.287 | 0.593 | 1431 | 642 |
| Right inferior temporal cortex gyrus   | -0.051 | 0.008 | 0.288 | 0.593 | 1400 | 642 |
| Right medial orbitofrontal cortex      | -0.049 | 0.009 | 0.310 | 0.598 | 1428 | 642 |
| Right caudal middle frontal gyrus      | -0.048 | 0.008 | 0.315 | 0.598 | 1423 | 640 |
| Left superior frontal gyrus            | -0.048 | 0.008 | 0.316 | 0.598 | 1413 | 626 |
| Left superior parietal cortex          | -0.041 | 0.006 | 0.389 | 0.715 | 1417 | 634 |
| Right pars orbitalis                   | -0.040 | 0.011 | 0.398 | 0.715 | 1431 | 643 |
| Left parahippocampal gyrus             | -0.038 | 0.015 | 0.427 | 0.743 | 1424 | 640 |
| Right superior parietal cortex         | -0.035 | 0.006 | 0.465 | 0.773 | 1411 | 630 |
| Right insula                           | -0.029 | 0.009 | 0.548 | 0.799 | 1415 | 633 |
| Right superior frontal gyrus           | -0.028 | 0.007 | 0.557 | 0.799 | 1410 | 639 |
| Right cuneus                           | -0.026 | 0.007 | 0.595 | 0.802 | 1401 | 629 |
| Left pars opercularis                  | -0.025 | 0.007 | 0.595 | 0.802 | 1427 | 642 |
| Left posterior cingulate cortex        | -0.023 | 0.008 | 0.625 | 0.820 | 1431 | 642 |
| Right pars triangularis                | -0.021 | 0.008 | 0.656 | 0.820 | 1423 | 633 |
| Right precentral gyrus                 | -0.017 | 0.007 | 0.727 | 0.879 | 1405 | 624 |
| Left supramarginal gyrus               | -0.017 | 0.007 | 0.728 | 0.879 | 1310 | 587 |
| Left lingual gyrus                     | -0.012 | 0.006 | 0.801 | 0.950 | 1427 | 642 |
| Right pars opercularis                 | -0.011 | 0.008 | 0.814 | 0.950 | 1418 | 639 |
| Left paracentral lobule                | -0.008 | 0.007 | 0.875 | 0.981 | 1430 | 642 |
| Right caudal anterior cingulate cortex | -0.008 | 0.012 | 0.872 | 0.981 | 1422 | 639 |
| Left cuneus                            | -0.004 | 0.007 | 0.938 | 0.981 | 1404 | 630 |
| Left transverse temporal cortex        | -0.004 | 0.010 | 0.934 | 0.981 | 1433 | 643 |
| Right posterior cingulate cortex       | -0.003 | 0.008 | 0.953 | 0.981 | 1427 | 640 |
| Left precentral gyrus                  | 0.001  | 0.007 | 0.977 | 0.988 | 1408 | 631 |
| Left pars triangularis                 | 0.001  | 0.008 | 0.988 | 0.988 | 1434 | 643 |

|                                                |       |       |       |       |      |     |
|------------------------------------------------|-------|-------|-------|-------|------|-----|
| <b>Right transverse temporal cortex</b>        | 0.004 | 0.010 | 0.939 | 0.981 | 1434 | 645 |
| <b>Left postcentral gyrus</b>                  | 0.004 | 0.006 | 0.940 | 0.981 | 1403 | 631 |
| <b>Left superior temporal gyrus</b>            | 0.005 | 0.008 | 0.919 | 0.981 | 1296 | 568 |
| <b>Right banks superior temporal sulcus</b>    | 0.022 | 0.009 | 0.656 | 0.820 | 1321 | 597 |
| <b>Right paracentral lobule</b>                | 0.022 | 0.007 | 0.651 | 0.820 | 1432 | 641 |
| <b>Right superior temporal gyrus</b>           | 0.027 | 0.008 | 0.592 | 0.802 | 1316 | 582 |
| <b>Right frontal pole</b>                      | 0.028 | 0.015 | 0.559 | 0.799 | 1434 | 643 |
| <b>Right supramarginal gyrus</b>               | 0.030 | 0.007 | 0.548 | 0.799 | 1321 | 590 |
| <b>Left temporal pole</b>                      | 0.033 | 0.017 | 0.486 | 0.773 | 1435 | 644 |
| <b>Right temporal pole</b>                     | 0.033 | 0.018 | 0.497 | 0.773 | 1430 | 635 |
| <b>Right rostral anterior cingulate cortex</b> | 0.034 | 0.012 | 0.486 | 0.773 | 1413 | 636 |
| <b>Right lingual gyrus</b>                     | 0.037 | 0.006 | 0.435 | 0.743 | 1433 | 642 |
| <b>Left pericalcarine gyrus</b>                | 0.054 | 0.006 | 0.264 | 0.593 | 1406 | 638 |
| <b>Left caudal anterior cingulate cortex</b>   | 0.055 | 0.014 | 0.254 | 0.593 | 1415 | 638 |
| <b>Right pericalcarine gyrus</b>               | 0.063 | 0.006 | 0.190 | 0.512 | 1409 | 635 |
| <b>Right postcentral gyrus</b>                 | 0.100 | 0.006 | 0.038 | 0.331 | 1414 | 632 |

**TABLE S21c:** Full mega-analytic results for cortical thickness of each structure for the childhood onset OCD patients compared with adult onset patients, controlling for age, sex and scan center.

|                                       | <b>Cohen's d<sup>a</sup><br/>(Childhood vs Adult-onset)</b> | <b>Standard Error</b> | <b>P-value</b> | <b>FDR P-value</b> | <b>N childhood onset patients</b> | <b>N adult onset patients</b> |
|---------------------------------------|-------------------------------------------------------------|-----------------------|----------------|--------------------|-----------------------------------|-------------------------------|
| Right postcentral gyrus               | -0.155                                                      | 0.007                 | 0.004          | 0.171              | 632                               | 764                           |
| Left precuneus                        | -0.144                                                      | 0.008                 | 0.008          | 0.171              | 643                               | 772                           |
| Right lingual gyrus                   | -0.140                                                      | 0.008                 | 0.010          | 0.171              | 642                               | 771                           |
| Left posterior cingulate cortex       | -0.124                                                      | 0.010                 | 0.022          | 0.251              | 642                               | 771                           |
| Left pars opercularis                 | -0.114                                                      | 0.009                 | 0.035          | 0.352              | 642                               | 770                           |
| Left supramarginal gyrus              | -0.108                                                      | 0.009                 | 0.056          | 0.357              | 587                               | 711                           |
| Right posterior cingulate cortex      | -0.105                                                      | 0.010                 | 0.051          | 0.357              | 640                               | 773                           |
| Right medial orbitofrontal cortex     | -0.105                                                      | 0.011                 | 0.052          | 0.357              | 642                               | 766                           |
| Right pars opercularis                | -0.105                                                      | 0.010                 | 0.054          | 0.357              | 639                               | 760                           |
| Left caudal anterior cingulate cortex | -0.102                                                      | 0.017                 | 0.062          | 0.360              | 638                               | 756                           |
| Right caudal middle frontal gyrus     | -0.096                                                      | 0.009                 | 0.075          | 0.378              | 640                               | 767                           |
| Left precentral gyrus                 | -0.095                                                      | 0.008                 | 0.082          | 0.378              | 631                               | 762                           |
| Left superior frontal gyrus           | -0.095                                                      | 0.009                 | 0.085          | 0.378              | 626                               | 741                           |
| Right transverse temporal gyrus       | -0.092                                                      | 0.013                 | 0.086          | 0.378              | 645                               | 772                           |
| Right cortical thickness              | -0.087                                                      | 0.006                 | 0.106          | 0.435              | 645                               | 771                           |
| Left cortical thickness               | -0.083                                                      | 0.006                 | 0.122          | 0.474              | 646                               | 773                           |
| Right pars triangularis               | -0.080                                                      | 0.010                 | 0.142          | 0.508              | 633                               | 759                           |
| Right precentral gyrus                | -0.078                                                      | 0.008                 | 0.152          | 0.508              | 624                               | 754                           |
| Left pars triangularis                | -0.078                                                      | 0.010                 | 0.150          | 0.508              | 643                               | 770                           |
| Left fusiform gyrus                   | -0.075                                                      | 0.009                 | 0.163          | 0.520              | 641                               | 769                           |
| Right supramarginal gyrus             | -0.074                                                      | 0.009                 | 0.187          | 0.554              | 590                               | 732                           |
| Right pars orbitalis                  | -0.069                                                      | 0.013                 | 0.203          | 0.554              | 643                               | 773                           |
| Left lingual gyrus                    | -0.068                                                      | 0.008                 | 0.206          | 0.554              | 642                               | 769                           |
| Right insula                          | -0.068                                                      | 0.011                 | 0.214          | 0.554              | 633                               | 751                           |

|                                         |        |       |       |       |     |     |
|-----------------------------------------|--------|-------|-------|-------|-----|-----|
| Left pericalcarine gyrus                | -0.068 | 0.008 | 0.212 | 0.554 | 638 | 765 |
| Left postcentral gyrus                  | -0.065 | 0.007 | 0.232 | 0.563 | 631 | 757 |
| Right middle temporal gyrus             | -0.065 | 0.009 | 0.234 | 0.563 | 634 | 754 |
| Left cuneus                             | -0.064 | 0.008 | 0.241 | 0.563 | 630 | 757 |
| Left superior temporal gyrus            | -0.064 | 0.010 | 0.267 | 0.583 | 568 | 690 |
| Left temporal pole                      | -0.060 | 0.021 | 0.265 | 0.583 | 644 | 770 |
| Left middle temporal gyrus              | -0.058 | 0.010 | 0.302 | 0.587 | 600 | 701 |
| Left paracentral lobule                 | -0.058 | 0.009 | 0.283 | 0.587 | 642 | 769 |
| Left superior parietal cortex           | -0.057 | 0.007 | 0.292 | 0.587 | 634 | 759 |
| Left medial orbitofrontal cortex        | -0.056 | 0.011 | 0.298 | 0.587 | 641 | 770 |
| Right superior temporal gyrus           | -0.056 | 0.010 | 0.323 | 0.604 | 582 | 722 |
| Right banks superior temporal sulcus    | -0.053 | 0.011 | 0.339 | 0.604 | 597 | 726 |
| Right pericalcarine gyrus               | -0.053 | 0.008 | 0.332 | 0.604 | 635 | 763 |
| Left caudal middle frontal gyrus        | -0.051 | 0.009 | 0.345 | 0.604 | 634 | 766 |
| Right superior frontal gyrus            | -0.050 | 0.009 | 0.358 | 0.611 | 639 | 760 |
| Right temporal pole                     | -0.045 | 0.023 | 0.405 | 0.660 | 635 | 759 |
| Right superior parietal cortex          | -0.044 | 0.007 | 0.415 | 0.660 | 630 | 759 |
| Right frontal pole                      | -0.041 | 0.018 | 0.444 | 0.689 | 643 | 773 |
| Left inferior temporal cortex gyrus     | -0.041 | 0.010 | 0.453 | 0.689 | 629 | 763 |
| Right fusiform gyrus                    | -0.040 | 0.009 | 0.467 | 0.695 | 633 | 758 |
| Right paracentral lobule                | -0.037 | 0.009 | 0.491 | 0.703 | 641 | 773 |
| Right precuneus                         | -0.037 | 0.008 | 0.492 | 0.703 | 644 | 768 |
| Right lateral occipital cortex          | -0.035 | 0.008 | 0.515 | 0.716 | 641 | 762 |
| Right rostral anterior cingulate cortex | -0.035 | 0.015 | 0.522 | 0.716 | 636 | 760 |
| Right inferior temporal cortex gyrus    | -0.034 | 0.010 | 0.533 | 0.717 | 642 | 767 |
| Left insula                             | -0.031 | 0.010 | 0.567 | 0.749 | 637 | 757 |
| Right caudal anterior cingulate cortex  | -0.030 | 0.015 | 0.583 | 0.749 | 639 | 764 |
| Left lateral occipital cortex           | -0.029 | 0.008 | 0.593 | 0.749 | 640 | 763 |
| Left pars orbitalis                     | -0.028 | 0.013 | 0.599 | 0.749 | 642 | 770 |

|                                        |        |       |       |       |     |     |
|----------------------------------------|--------|-------|-------|-------|-----|-----|
| Right rostral middle frontal gyrus     | -0.027 | 0.008 | 0.622 | 0.764 | 644 | 770 |
| Left banks superior temporal sulcus    | -0.025 | 0.011 | 0.661 | 0.785 | 590 | 701 |
| Left rostral middle frontal gyrus      | -0.024 | 0.008 | 0.657 | 0.785 | 641 | 766 |
| Right cuneus                           | -0.021 | 0.008 | 0.702 | 0.816 | 629 | 756 |
| Left inferior parietal cortex          | -0.020 | 0.008 | 0.711 | 0.816 | 613 | 745 |
| Right inferior parietal cortex         | -0.018 | 0.008 | 0.738 | 0.833 | 621 | 755 |
| Left parahippocampal gyrus             | -0.011 | 0.019 | 0.839 | 0.933 | 640 | 770 |
| Left isthmus cingulate cortex          | -0.008 | 0.013 | 0.885 | 0.933 | 641 | 772 |
| Right lateral orbitofrontal cortex     | -0.007 | 0.010 | 0.893 | 0.933 | 646 | 772 |
| Right parahippocampal gyrus            | -0.001 | 0.015 | 0.980 | 0.993 | 640 | 771 |
| Left transverse temporal gyrus         | 0.000  | 0.013 | 0.993 | 0.993 | 643 | 771 |
| Left frontal pole                      | 0.003  | 0.018 | 0.959 | 0.987 | 642 | 771 |
| Right isthmus cingulate cortex         | 0.009  | 0.012 | 0.874 | 0.933 | 645 | 773 |
| Left lateral orbitofrontal cortex      | 0.010  | 0.010 | 0.854 | 0.933 | 645 | 770 |
| Left rostral anterior cingulate cortex | 0.045  | 0.015 | 0.411 | 0.660 | 637 | 757 |
| Left entorhinal cortex                 | 0.133  | 0.023 | 0.018 | 0.251 | 590 | 717 |
| Right entorhinal cortex                | 0.150  | 0.024 | 0.009 | 0.171 | 579 | 685 |

**TABLE S22a:** Full mega-analytic results for surface area of each structure for the adult onset OCD patients compared with adult healthy controls, controlling for age, sex, scan center and ICV.

|                                  | <b>Cohen's d<sup>a</sup><br/>(Adult-onset vs HC)</b> | <b>Standard Error</b> | <b>P-value</b> | <b>FDR P-value</b> | <b>N controls</b> | <b>N patients</b> |
|----------------------------------|------------------------------------------------------|-----------------------|----------------|--------------------|-------------------|-------------------|
| Left transverse temporal cortex  | -0.166                                               | 3.363                 | 2.233E-04      | 0.015              | 1431              | 770               |
| Left pars opercularis            | -0.144                                               | 11.565                | 0.001          | 0.050              | 1425              | 769               |
| Right transverse temporal cortex | -0.123                                               | 2.460                 | 0.006          | 0.141              | 1432              | 771               |
| Right superior temporal gyrus    | -0.120                                               | 14.245                | 0.010          | 0.171              | 1314              | 721               |
| Left pars triangularis           | -0.099                                               | 8.187                 | 0.028          | 0.382              | 1432              | 769               |
| Right posterior cingulate cortex | -0.084                                               | 7.308                 | 0.061          | 0.695              | 1425              | 772               |
| Right middle temporal gyrus      | -0.080                                               | 14.965                | 0.080          | 0.697              | 1401              | 754               |
| Left superior temporal gyrus     | -0.080                                               | 16.869                | 0.093          | 0.697              | 1294              | 689               |
| Left postcentral gyrus           | -0.078                                               | 18.129                | 0.087          | 0.697              | 1401              | 756               |
| Left insula                      | -0.072                                               | 8.961                 | 0.113          | 0.697              | 1412              | 756               |
| Left surface area                | -0.070                                               | 213.224               | 0.119          | 1.000              | 1433              | 772               |
| Left supramarginal gyrus         | -0.069                                               | 21.497                | 0.141          | 0.706              | 1308              | 710               |
| Right superior frontal gyrus     | -0.066                                               | 27.207                | 0.144          | 0.706              | 1408              | 759               |
| Left entorhinal cortex           | -0.062                                               | 3.504                 | 0.185          | 0.706              | 1316              | 717               |
| Left superior frontal gyrus      | -0.061                                               | 26.857                | 0.184          | 0.706              | 1411              | 740               |
| Right supramarginal gyrus        | -0.059                                               | 20.156                | 0.201          | 0.706              | 1319              | 731               |
| Left caudal middle frontal gyrus | -0.054                                               | 14.753                | 0.229          | 0.706              | 1427              | 765               |
| Left isthmus cingulate cortex    | -0.054                                               | 6.878                 | 0.227          | 0.706              | 1429              | 771               |
| Left superior parietal cortex    | -0.053                                               | 24.325                | 0.242          | 0.706              | 1415              | 758               |
| Right isthmus cingulate cortex   | -0.053                                               | 6.140                 | 0.236          | 0.706              | 1427              | 772               |
| Right pars triangularis          | -0.052                                               | 10.184                | 0.250          | 0.706              | 1421              | 758               |
| Left lingual gyrus               | -0.052                                               | 16.530                | 0.248          | 0.706              | 1425              | 768               |
| Left middle temporal gyrus       | -0.051                                               | 15.241                | 0.284          | 0.706              | 1319              | 700               |
| Right pars opercularis           | -0.051                                               | 9.658                 | 0.261          | 0.706              | 1416              | 760               |
| Right surface area               | -0.047                                               | 216.320               | 0.294          | 1.000              | 1434              | 772               |



|                                         |        |        |       |       |      |     |
|-----------------------------------------|--------|--------|-------|-------|------|-----|
| Left inferior temporal cortex gyrus     | -0.042 | 18.158 | 0.352 | 0.706 | 1382 | 762 |
| Left lateral occipital cortex           | -0.041 | 21.929 | 0.366 | 0.706 | 1417 | 762 |
| Left frontal pole                       | -0.041 | 1.539  | 0.359 | 0.706 | 1433 | 770 |
| Right precentral gyrus                  | -0.039 | 20.670 | 0.396 | 0.706 | 1403 | 753 |
| Right pars orbitalis                    | -0.039 | 4.138  | 0.389 | 0.706 | 1429 | 772 |
| Left banks superior temporal sulcus     | -0.038 | 7.120  | 0.418 | 0.706 | 1282 | 700 |
| Right postcentral gyrus                 | -0.037 | 17.648 | 0.408 | 0.706 | 1412 | 763 |
| Left lateral orbitofrontal cortex       | -0.035 | 10.696 | 0.442 | 0.706 | 1431 | 769 |
| Right lateral occipital cortex          | -0.034 | 22.302 | 0.447 | 0.706 | 1419 | 761 |
| Right insula                            | -0.031 | 10.053 | 0.489 | 0.744 | 1413 | 750 |
| Right entorhinal cortex                 | -0.030 | 6.114  | 0.539 | 0.772 | 1242 | 684 |
| Left pars orbitalis                     | -0.029 | 3.331  | 0.526 | 0.772 | 1429 | 769 |
| Right fusiform gyrus                    | -0.027 | 15.728 | 0.545 | 0.772 | 1426 | 757 |
| Right superior parietal cortex          | -0.020 | 23.732 | 0.665 | 0.904 | 1409 | 758 |
| Left posterior cingulate cortex         | -0.017 | 7.051  | 0.706 | 0.930 | 1429 | 770 |
| Right pericalcarine gyrus               | -0.016 | 10.137 | 0.728 | 0.930 | 1407 | 762 |
| Right lingual gyrus                     | -0.015 | 15.749 | 0.739 | 0.930 | 1431 | 770 |
| Left pericalcarine gyrus                | -0.015 | 9.412  | 0.738 | 0.930 | 1404 | 764 |
| Right caudal anterior cingulate cortex  | -0.013 | 6.625  | 0.782 | 0.956 | 1420 | 763 |
| Left precentral gyrus                   | -0.009 | 18.712 | 0.840 | 0.971 | 1406 | 761 |
| Right rostral anterior cingulate cortex | -0.008 | 5.568  | 0.865 | 0.980 | 1411 | 760 |
| Right banks superior temporal sulcus    | -0.004 | 5.916  | 0.939 | 0.996 | 1319 | 725 |
| Left cuneus                             | -0.003 | 8.359  | 0.956 | 0.996 | 1402 | 756 |
| Left paracentral lobule                 | -0.003 | 7.454  | 0.942 | 0.996 | 1428 | 768 |
| Right lateral orbitofrontal cortex      | -0.001 | 11.698 | 0.985 | 0.996 | 1429 | 771 |
| Right frontal pole                      | 0.001  | 1.921  | 0.982 | 0.996 | 1432 | 772 |
| Left temporal pole                      | <0.001 | 2.726  | 0.996 | 0.996 | 1434 | 769 |
| Left rostral middle frontal gyrus       | 0.002  | 25.836 | 0.967 | 0.996 | 1427 | 765 |
| Right rostral middle frontal gyrus      | 0.005  | 26.731 | 0.920 | 0.996 | 1422 | 769 |

|                                        |       |        |       |       |      |     |
|----------------------------------------|-------|--------|-------|-------|------|-----|
| Right parahippocampal gyrus            | 0.009 | 4.206  | 0.842 | 0.971 | 1418 | 770 |
| Right precuneus                        | 0.010 | 17.731 | 0.826 | 0.971 | 1427 | 767 |
| Right caudal middle frontal gyrus      | 0.012 | 15.007 | 0.788 | 0.956 | 1421 | 766 |
| Right cuneus                           | 0.020 | 8.088  | 0.653 | 0.904 | 1399 | 755 |
| Right inferior temporal cortex gyrus   | 0.031 | 17.173 | 0.492 | 0.744 | 1399 | 766 |
| Left rostral anterior cingulate cortex | 0.036 | 6.095  | 0.434 | 0.706 | 1413 | 756 |
| Left fusiform gyrus                    | 0.037 | 16.073 | 0.412 | 0.706 | 1426 | 768 |
| Left inferior parietal cortex          | 0.041 | 24.382 | 0.373 | 0.706 | 1363 | 744 |
| Left medial orbitofrontal cortex       | 0.043 | 9.445  | 0.335 | 0.706 | 1428 | 769 |
| Right paracentral lobule               | 0.045 | 8.594  | 0.314 | 0.706 | 1430 | 772 |
| Right temporal pole                    | 0.046 | 2.772  | 0.305 | 0.706 | 1428 | 758 |
| Left precuneus                         | 0.046 | 15.990 | 0.305 | 0.706 | 1424 | 771 |
| Right inferior parietal cortex         | 0.047 | 27.036 | 0.304 | 0.706 | 1377 | 754 |
| Left parahippocampal gyrus             | 0.048 | 4.490  | 0.283 | 0.706 | 1422 | 769 |
| Right medial orbitofrontal cortex      | 0.048 | 7.738  | 0.290 | 0.706 | 1426 | 766 |
| Left caudal anterior cingulate cortex  | 0.073 | 5.773  | 0.106 | 0.697 | 1413 | 755 |

**TABLE S22b:** Full mega-analytic results for surface area of each structure for the childhood onset OCD patients compared with adult healthy controls, controlling for age, sex, scan center and ICV.

|                                         | <b>Cohen's d<sup>a</sup><br/>(Childhood-onset vs HC)</b> | <b>Standard Error</b> | <b>P-value</b> | <b>FDR P-value</b> | <b>N controls</b> | <b>N patients</b> |
|-----------------------------------------|----------------------------------------------------------|-----------------------|----------------|--------------------|-------------------|-------------------|
| Left transverse temporal cortex         | -0.145                                                   | 3.477                 | 0.002          | 0.166              | 1431              | 643               |
| Right rostral anterior cingulate cortex | -0.103                                                   | 5.838                 | 0.032          | 0.937              | 1411              | 636               |
| Right supramarginal gyrus               | -0.095                                                   | 21.191                | 0.059          | 0.937              | 1319              | 590               |
| Left pars triangularis                  | -0.095                                                   | 8.494                 | 0.048          | 0.937              | 1432              | 643               |
| Right transverse temporal cortex        | -0.078                                                   | 2.553                 | 0.103          | 0.937              | 1432              | 645               |
| Right superior temporal gyrus           | -0.075                                                   | 15.087                | 0.133          | 0.937              | 1314              | 582               |
| Left rostral anterior cingulate cortex  | -0.072                                                   | 6.384                 | 0.135          | 0.937              | 1413              | 637               |
| Left superior frontal gyrus             | -0.066                                                   | 28.211                | 0.174          | 0.937              | 1411              | 626               |
| Right superior frontal gyrus            | -0.063                                                   | 28.485                | 0.194          | 0.937              | 1408              | 639               |
| Right caudal anterior cingulate cortex  | -0.063                                                   | 7.101                 | 0.192          | 0.937              | 1420              | 639               |
| Left caudal anterior cingulate cortex   | -0.058                                                   | 5.859                 | 0.226          | 0.937              | 1413              | 638               |
| Left posterior cingulate cortex         | -0.054                                                   | 7.356                 | 0.262          | 0.937              | 1429              | 642               |
| Right pericalcarine gyrus               | -0.049                                                   | 10.588                | 0.312          | 0.937              | 1407              | 635               |
| Right posterior cingulate cortex        | -0.048                                                   | 7.884                 | 0.314          | 0.937              | 1425              | 640               |
| Left pars orbitalis                     | -0.044                                                   | 3.502                 | 0.359          | 0.937              | 1429              | 642               |
| Left lateral orbitofrontal cortex       | -0.038                                                   | 11.248                | 0.431          | 0.937              | 1431              | 645               |
| Right cuneus                            | -0.038                                                   | 8.854                 | 0.434          | 0.937              | 1399              | 629               |
| Left postcentral gyrus                  | -0.035                                                   | 19.392                | 0.469          | 0.937              | 1401              | 631               |
| Left cuneus                             | -0.033                                                   | 8.756                 | 0.494          | 0.937              | 1402              | 630               |
| Left superior parietal cortex           | -0.029                                                   | 25.954                | 0.548          | 0.937              | 1415              | 634               |
| Right precuneus                         | -0.025                                                   | 18.911                | 0.607          | 0.937              | 1427              | 644               |
| Left superior temporal gyrus            | -0.025                                                   | 17.643                | 0.628          | 0.937              | 1294              | 568               |
| Left supramarginal gyrus                | -0.025                                                   | 22.813                | 0.623          | 0.937              | 1308              | 587               |
| Left frontal pole                       | -0.025                                                   | 1.613                 | 0.596          | 0.937              | 1433              | 642               |
| Left surface area                       | -0.025                                                   | 224.936               | 0.594          | 1.000              | 1433              | 646               |

|                                      |        |         |       |       |      |     |
|--------------------------------------|--------|---------|-------|-------|------|-----|
| Left medial orbitofrontal cortex     | -0.024 | 9.798   | 0.617 | 0.937 | 1428 | 641 |
| Right lateral occipital cortex       | -0.020 | 23.796  | 0.681 | 0.937 | 1419 | 641 |
| Left pars opercularis                | -0.020 | 12.041  | 0.676 | 0.937 | 1425 | 642 |
| Left paracentral lobule              | -0.018 | 7.937   | 0.703 | 0.937 | 1428 | 642 |
| Left caudal middle frontal gyrus     | -0.018 | 15.835  | 0.703 | 0.937 | 1427 | 634 |
| Right pars opercularis               | -0.015 | 10.161  | 0.753 | 0.967 | 1416 | 639 |
| Right superior parietal cortex       | -0.014 | 25.302  | 0.776 | 0.968 | 1409 | 630 |
| Left insula                          | -0.013 | 9.687   | 0.783 | 0.968 | 1412 | 637 |
| Right pars triangularis              | -0.011 | 10.711  | 0.816 | 0.977 | 1421 | 633 |
| Left lateral occipital cortex        | -0.010 | 22.827  | 0.832 | 0.977 | 1417 | 640 |
| Right caudal middle frontal gyrus    | -0.008 | 16.101  | 0.875 | 0.977 | 1421 | 640 |
| Right entorhinal cortex              | -0.008 | 6.459   | 0.875 | 0.977 | 1242 | 579 |
| Left pericalcarine gyrus             | -0.007 | 9.925   | 0.887 | 0.977 | 1404 | 638 |
| Right temporal pole                  | -0.005 | 2.948   | 0.912 | 0.979 | 1428 | 635 |
| Right surface area                   | -0.004 | 227.308 | 0.936 | 1.000 | 1434 | 644 |
| Right insula                         | -0.001 | 10.510  | 0.977 | 0.981 | 1413 | 633 |
| Left temporal pole                   | 0.001  | 2.807   | 0.981 | 0.981 | 1434 | 644 |
| Left inferior temporal cortex gyrus  | 0.003  | 18.832  | 0.950 | 0.979 | 1382 | 629 |
| Left lingual gyrus                   | 0.004  | 17.670  | 0.938 | 0.979 | 1425 | 642 |
| Right paracentral lobule             | 0.004  | 9.259   | 0.938 | 0.979 | 1430 | 641 |
| Right lingual gyrus                  | 0.007  | 16.266  | 0.891 | 0.977 | 1431 | 642 |
| Right parahippocampal gyrus          | 0.010  | 4.526   | 0.835 | 0.977 | 1418 | 640 |
| Right medial orbitofrontal cortex    | 0.016  | 8.148   | 0.744 | 0.967 | 1426 | 642 |
| Right inferior temporal cortex gyrus | 0.021  | 17.943  | 0.668 | 0.937 | 1399 | 642 |
| Left rostral middle frontal gyrus    | 0.022  | 27.607  | 0.647 | 0.937 | 1427 | 641 |
| Right rostral middle frontal gyrus   | 0.022  | 28.073  | 0.653 | 0.937 | 1422 | 644 |
| Right lateral orbitofrontal cortex   | 0.024  | 12.245  | 0.614 | 0.937 | 1429 | 646 |
| Right postcentral gyrus              | 0.026  | 18.694  | 0.591 | 0.937 | 1412 | 632 |
| Left isthmus cingulate cortex        | 0.027  | 7.257   | 0.571 | 0.937 | 1429 | 641 |

|                                      |       |        |       |       |      |     |
|--------------------------------------|-------|--------|-------|-------|------|-----|
| Left inferior parietal cortex        | 0.028 | 25.243 | 0.573 | 0.937 | 1363 | 613 |
| Left precentral gyrus                | 0.033 | 19.579 | 0.497 | 0.937 | 1406 | 631 |
| Left precuneus                       | 0.034 | 17.203 | 0.472 | 0.937 | 1424 | 643 |
| Right isthmus cingulate cortex       | 0.034 | 6.417  | 0.483 | 0.937 | 1427 | 645 |
| Right middle temporal gyrus          | 0.035 | 15.720 | 0.471 | 0.937 | 1401 | 634 |
| Right fusiform gyrus                 | 0.037 | 16.349 | 0.445 | 0.937 | 1426 | 633 |
| Left banks superior temporal sulcus  | 0.040 | 7.455  | 0.424 | 0.937 | 1282 | 590 |
| Right frontal pole                   | 0.043 | 2.045  | 0.371 | 0.937 | 1432 | 643 |
| Left entorhinal cortex               | 0.047 | 3.752  | 0.346 | 0.937 | 1316 | 590 |
| Left fusiform gyrus                  | 0.050 | 16.982 | 0.299 | 0.937 | 1426 | 641 |
| Right precentral gyrus               | 0.050 | 21.674 | 0.305 | 0.937 | 1403 | 624 |
| Right pars orbitalis                 | 0.056 | 4.358  | 0.241 | 0.937 | 1429 | 643 |
| Left middle temporal gyrus           | 0.056 | 15.657 | 0.261 | 0.937 | 1319 | 600 |
| Right banks superior temporal sulcus | 0.063 | 6.289  | 0.207 | 0.937 | 1319 | 597 |
| Left parahippocampal gyrus           | 0.063 | 4.582  | 0.192 | 0.937 | 1422 | 640 |
| Right inferior parietal cortex       | 0.075 | 28.780 | 0.122 | 0.937 | 1377 | 621 |

**TABLE S22c:** Full mega-analytic results for surface area of each structure for the childhood onset OCD patients compared with adult onset patients, controlling for age, sex, scan center and ICV.

|                                             | <b>Cohen's d<sup>a</sup><br/>(Childhood vs Adult-onset)</b> | <b>Standard Error</b> | <b>P-value</b> | <b>FDR P-value</b> | <b>N childhood onset patients</b> | <b>N adult onset patients</b> |
|---------------------------------------------|-------------------------------------------------------------|-----------------------|----------------|--------------------|-----------------------------------|-------------------------------|
| <b>Left pars opercularis</b>                | -0.117                                                      | 14.189                | 0.030          | 0.811              | 642                               | 769                           |
| <b>Right middle temporal gyrus</b>          | -0.101                                                      | 18.774                | 0.063          | 0.840              | 634                               | 754                           |
| <b>Right precentral gyrus</b>               | -0.084                                                      | 26.949                | 0.125          | 0.840              | 624                               | 753                           |
| <b>Left banks superior temporal sulcus</b>  | -0.083                                                      | 9.214                 | 0.145          | 0.840              | 590                               | 700                           |
| <b>Left lingual gyrus</b>                   | -0.078                                                      | 20.872                | 0.148          | 0.840              | 642                               | 768                           |
| <b>Left isthmus cingulate cortex</b>        | -0.076                                                      | 9.010                 | 0.160          | 0.840              | 641                               | 771                           |
| <b>Left postcentral gyrus</b>               | -0.074                                                      | 23.550                | 0.175          | 0.840              | 631                               | 756                           |
| <b>Right frontal pole</b>                   | -0.072                                                      | 2.507                 | 0.183          | 0.840              | 643                               | 772                           |
| <b>Left caudal middle frontal gyrus</b>     | -0.072                                                      | 19.131                | 0.186          | 0.840              | 634                               | 765                           |
| <b>Left entorhinal cortex</b>               | -0.072                                                      | 4.494                 | 0.203          | 0.840              | 590                               | 717                           |
| <b>Right isthmus cingulate cortex</b>       | -0.071                                                      | 8.147                 | 0.188          | 0.840              | 645                               | 772                           |
| <b>Right postcentral gyrus</b>              | -0.069                                                      | 22.146                | 0.206          | 0.840              | 632                               | 763                           |
| <b>Left superior temporal gyrus</b>         | -0.066                                                      | 20.873                | 0.250          | 0.840              | 568                               | 689                           |
| <b>Left lateral occipital cortex</b>        | -0.063                                                      | 27.066                | 0.244          | 0.840              | 640                               | 762                           |
| <b>Right pars triangularis</b>              | -0.060                                                      | 13.092                | 0.269          | 0.840              | 633                               | 758                           |
| <b>Right pars orbitalis</b>                 | -0.056                                                      | 5.311                 | 0.299          | 0.840              | 643                               | 772                           |
| <b>Right banks superior temporal sulcus</b> | -0.056                                                      | 7.468                 | 0.317          | 0.840              | 597                               | 725                           |
| <b>Right fusiform gyrus</b>                 | -0.056                                                      | 19.750                | 0.306          | 0.840              | 633                               | 757                           |
| <b>Left middle temporal gyrus</b>           | -0.054                                                      | 19.142                | 0.339          | 0.840              | 600                               | 700                           |
| <b>Left insula</b>                          | -0.054                                                      | 11.509                | 0.325          | 0.840              | 637                               | 756                           |
| <b>Left frontal pole</b>                    | -0.050                                                      | 1.938                 | 0.358          | 0.840              | 642                               | 770                           |
| <b>Left precentral gyrus</b>                | -0.048                                                      | 24.779                | 0.383          | 0.844              | 631                               | 761                           |
| <b>Left surface area</b>                    | -0.047                                                      | 274.441               | 0.381          | 1.000              | 646                               | 772                           |
| <b>Left supramarginal gyrus</b>             | -0.046                                                      | 27.265                | 0.414          | 0.844              | 587                               | 710                           |
| <b>Right surface area</b>                   | -0.045                                                      | 277.645               | 0.400          | 1.000              | 644                               | 772                           |

|                                      |        |        |       |       |     |     |
|--------------------------------------|--------|--------|-------|-------|-----|-----|
| Right rostral middle frontal gyrus   | -0.041 | 33.051 | 0.442 | 0.844 | 644 | 769 |
| Right insula                         | -0.040 | 12.451 | 0.462 | 0.844 | 633 | 750 |
| Left inferior temporal cortex gyrus  | -0.036 | 22.897 | 0.503 | 0.844 | 629 | 762 |
| Left rostral middle frontal gyrus    | -0.035 | 32.692 | 0.523 | 0.844 | 641 | 765 |
| Right lingual gyrus                  | -0.034 | 20.574 | 0.523 | 0.844 | 642 | 770 |
| Left pars triangularis               | -0.034 | 10.440 | 0.527 | 0.844 | 643 | 769 |
| Left superior parietal cortex        | -0.032 | 30.941 | 0.552 | 0.844 | 634 | 758 |
| Right superior parietal cortex       | -0.032 | 29.743 | 0.560 | 0.844 | 630 | 758 |
| Right posterior cingulate cortex     | -0.031 | 9.585  | 0.571 | 0.844 | 640 | 772 |
| Right pars opercularis               | -0.028 | 12.496 | 0.607 | 0.860 | 639 | 760 |
| Right entorhinal cortex              | -0.024 | 5.117  | 0.675 | 0.877 | 579 | 684 |
| Right transverse temporal gyrus      | -0.024 | 3.059  | 0.661 | 0.877 | 645 | 771 |
| Right inferior parietal cortex       | -0.024 | 34.817 | 0.668 | 0.877 | 621 | 754 |
| Left transverse temporal gyrus       | -0.023 | 4.182  | 0.667 | 0.877 | 643 | 770 |
| Right superior temporal gyrus        | -0.023 | 18.134 | 0.684 | 0.877 | 582 | 721 |
| Left paracentral lobule              | -0.017 | 9.382  | 0.754 | 0.913 | 642 | 768 |
| Left fusiform gyrus                  | -0.014 | 20.835 | 0.791 | 0.913 | 641 | 768 |
| Left parahippocampal gyrus           | -0.014 | 5.771  | 0.792 | 0.913 | 640 | 769 |
| Right caudal middle frontal gyrus    | -0.010 | 19.337 | 0.859 | 0.973 | 640 | 766 |
| Right paracentral lobule             | -0.009 | 11.408 | 0.875 | 0.975 | 641 | 772 |
| Right lateral occipital cortex       | -0.006 | 28.425 | 0.908 | 0.976 | 641 | 761 |
| Right superior frontal gyrus         | -0.006 | 35.164 | 0.913 | 0.976 | 639 | 759 |
| Left pericalcarine gyrus             | -0.003 | 11.852 | 0.960 | 0.978 | 638 | 764 |
| Left inferior parietal cortex        | -0.001 | 31.575 | 0.989 | 0.989 | 613 | 744 |
| Left lateral orbitofrontal cortex    | 0.002  | 13.601 | 0.964 | 0.978 | 645 | 769 |
| Right inferior temporal cortex gyrus | 0.004  | 22.346 | 0.944 | 0.978 | 642 | 766 |
| Left temporal pole                   | 0.006  | 3.395  | 0.918 | 0.976 | 644 | 769 |
| Left pars orbitalis                  | 0.015  | 4.213  | 0.781 | 0.913 | 642 | 769 |
| Left cuneus                          | 0.015  | 10.708 | 0.780 | 0.913 | 630 | 756 |

|                                         |       |        |       |       |     |     |
|-----------------------------------------|-------|--------|-------|-------|-----|-----|
| Left superior frontal gyrus             | 0.018 | 35.523 | 0.748 | 0.913 | 626 | 740 |
| Right lateral orbitofrontal cortex      | 0.028 | 14.774 | 0.601 | 0.860 | 646 | 771 |
| Right medial orbitofrontal cortex       | 0.032 | 9.875  | 0.560 | 0.844 | 642 | 766 |
| Right pericalcarine gyrus               | 0.034 | 12.558 | 0.530 | 0.844 | 635 | 762 |
| Right supramarginal gyrus               | 0.038 | 26.106 | 0.492 | 0.844 | 590 | 731 |
| Right parahippocampal gyrus             | 0.040 | 5.369  | 0.458 | 0.844 | 640 | 770 |
| Right cuneus                            | 0.041 | 10.660 | 0.449 | 0.844 | 629 | 755 |
| Right temporal pole                     | 0.042 | 3.458  | 0.436 | 0.844 | 635 | 758 |
| Right caudal anterior cingulate cortex  | 0.050 | 8.226  | 0.354 | 0.840 | 639 | 763 |
| Left precuneus                          | 0.056 | 20.809 | 0.298 | 0.840 | 643 | 771 |
| Right precuneus                         | 0.058 | 22.457 | 0.281 | 0.840 | 644 | 767 |
| Left medial orbitofrontal cortex        | 0.063 | 11.845 | 0.242 | 0.840 | 641 | 769 |
| Left posterior cingulate cortex         | 0.069 | 8.707  | 0.199 | 0.840 | 642 | 770 |
| Right rostral anterior cingulate cortex | 0.088 | 7.097  | 0.105 | 0.840 | 636 | 760 |
| Left rostral anterior cingulate cortex  | 0.114 | 7.538  | 0.036 | 0.811 | 637 | 756 |
| Left caudal anterior cingulate cortex   | 0.129 | 7.355  | 0.018 | 0.811 | 638 | 755 |



**TABLE S23a:** Full mega-analytic results for cortical thickness of each structure for the age of onset regression analysis in adult OCD patients, controlling for age, sex and scan center. Correlation coefficient Pearsons r is reported.

|                                         | <b>Pearson's r (AO)</b> | <b>Standard Error</b> | <b>P-value</b> | <b>FDR P-value</b> | <b>N patients</b> |
|-----------------------------------------|-------------------------|-----------------------|----------------|--------------------|-------------------|
| Right postcentral gyrus                 | -0.065                  | <0.001                | 0.016          | 0.449              | 1396              |
| Right superior temporal gyrus           | -0.061                  | 0.001                 | 0.030          | 0.449              | 1304              |
| Right banks superior temporal sulcus    | -0.060                  | 0.001                 | 0.031          | 0.449              | 1323              |
| Left supramarginal gyrus                | -0.056                  | 0.001                 | 0.048          | 0.476              | 1298              |
| Right transverse temporal cortex        | -0.054                  | 0.001                 | 0.045          | 0.476              | 1417              |
| Left precuneus                          | -0.049                  | 0.001                 | 0.068          | 0.592              | 1415              |
| Left precentral gyrus                   | -0.048                  | 0.001                 | 0.077          | 0.598              | 1393              |
| Left posterior cingulate cortex         | -0.038                  | 0.001                 | 0.159          | 0.912              | 1413              |
| Right precentral gyrus                  | -0.036                  | 0.001                 | 0.190          | 0.912              | 1378              |
| Left postcentral gyrus                  | -0.032                  | <0.001                | 0.237          | 0.912              | 1388              |
| Right middle temporal gyrus             | -0.032                  | 0.001                 | 0.232          | 0.912              | 1388              |
| Left middle temporal gyrus              | -0.030                  | 0.001                 | 0.285          | 0.912              | 1301              |
| Left inferior parietal cortex           | -0.029                  | 0.001                 | 0.295          | 0.912              | 1358              |
| Left banks superior temporal sulcus     | -0.027                  | 0.001                 | 0.341          | 0.912              | 1291              |
| Left caudal anterior cingulate cortex   | -0.026                  | 0.001                 | 0.337          | 0.912              | 1394              |
| Left pericalcarine gyrus                | -0.026                  | <0.001                | 0.330          | 0.912              | 1403              |
| Right inferior parietal cortex          | -0.023                  | 0.001                 | 0.401          | 0.912              | 1376              |
| Right pars orbitalis                    | -0.022                  | 0.001                 | 0.417          | 0.912              | 1416              |
| Left paracentral lobule                 | -0.021                  | 0.001                 | 0.437          | 0.912              | 1411              |
| Right rostral anterior cingulate cortex | -0.020                  | 0.001                 | 0.467          | 0.912              | 1396              |
| Left fusiform gyrus                     | -0.019                  | 0.001                 | 0.486          | 0.912              | 1410              |
| Left superior temporal gyrus            | -0.019                  | 0.001                 | 0.504          | 0.912              | 1258              |
| Right supramarginal gyrus               | -0.019                  | 0.001                 | 0.489          | 0.912              | 1322              |
| Right fusiform gyrus                    | -0.018                  | 0.001                 | 0.496          | 0.912              | 1391              |
| Left pars triangularis                  | -0.017                  | 0.001                 | 0.535          | 0.912              | 1413              |

|                                        |        |        |       |       |      |
|----------------------------------------|--------|--------|-------|-------|------|
| Right lingual gyrus                    | -0.017 | <0.001 | 0.525 | 0.912 | 1413 |
| Left pars opercularis                  | -0.016 | 0.001  | 0.540 | 0.912 | 1412 |
| Left cuneus                            | -0.015 | 0.001  | 0.589 | 0.912 | 1387 |
| Right caudal middle frontal gyrus      | -0.015 | 0.001  | 0.583 | 0.912 | 1407 |
| Right precuneus                        | -0.014 | 0.001  | 0.609 | 0.912 | 1412 |
| Right caudal anterior cingulate cortex | -0.014 | 0.001  | 0.606 | 0.912 | 1403 |
| Left parahippocampal gyrus             | -0.014 | 0.001  | 0.602 | 0.912 | 1410 |
| Right pars opercularis                 | -0.013 | 0.001  | 0.629 | 0.912 | 1399 |
| Left inferior temporal cortex gyrus    | -0.012 | 0.001  | 0.652 | 0.912 | 1392 |
| Right cortical thickness               | -0.012 | <0.001 | 0.647 | 0.912 | 1416 |
| Left superior parietal cortex          | -0.012 | <0.001 | 0.649 | 0.912 | 1393 |
| Left cortical thickness                | -0.011 | <0.001 | 0.684 | 0.912 | 1419 |
| Right pericalcarine gyrus              | -0.011 | <0.001 | 0.685 | 0.912 | 1398 |
| Right parahippocampal gyrus            | -0.011 | 0.001  | 0.672 | 0.912 | 1411 |
| Right posterior cingulate cortex       | -0.009 | 0.001  | 0.749 | 0.912 | 1413 |
| Right paracentral lobule               | -0.009 | 0.001  | 0.731 | 0.912 | 1414 |
| Right superior parietal cortex         | -0.008 | <0.001 | 0.771 | 0.912 | 1389 |
| Left temporal pole                     | -0.008 | 0.001  | 0.759 | 0.912 | 1414 |
| Right temporal pole                    | -0.007 | 0.001  | 0.806 | 0.912 | 1394 |
| Left lingual gyrus                     | -0.007 | <0.001 | 0.801 | 0.912 | 1411 |
| Right pars triangularis                | -0.003 | 0.001  | 0.907 | 0.981 | 1392 |
| Right inferior temporal cortex gyrus   | -0.002 | 0.001  | 0.927 | 0.981 | 1409 |
| Left medial orbitofrontal cortex       | -0.001 | 0.001  | 0.967 | 0.981 | 1411 |
| Left caudal middle frontal gyrus       | 0.001  | 0.001  | 0.957 | 0.981 | 1400 |
| Right medial orbitofrontal cortex      | <0.001 | 0.001  | 0.991 | 0.991 | 1408 |
| Left insula                            | 0.002  | 0.001  | 0.947 | 0.981 | 1394 |
| Left pars orbitalis                    | 0.003  | 0.001  | 0.921 | 0.981 | 1412 |
| Right cuneus                           | 0.003  | 0.001  | 0.922 | 0.981 | 1385 |
| Left isthmus cingulate cortex          | 0.007  | 0.001  | 0.781 | 0.912 | 1413 |

|                                        |       |        |       |       |      |
|----------------------------------------|-------|--------|-------|-------|------|
| Right insula                           | 0.007 | 0.001  | 0.808 | 0.912 | 1384 |
| Left frontal pole                      | 0.009 | 0.001  | 0.733 | 0.912 | 1413 |
| Left superior frontal gyrus            | 0.010 | 0.001  | 0.708 | 0.912 | 1367 |
| Right isthmus cingulate cortex         | 0.012 | 0.001  | 0.657 | 0.912 | 1418 |
| Left transverse temporal cortex        | 0.014 | 0.001  | 0.608 | 0.912 | 1414 |
| Right lateral occipital cortex         | 0.014 | 0.001  | 0.616 | 0.912 | 1403 |
| Right frontal pole                     | 0.017 | 0.001  | 0.536 | 0.912 | 1416 |
| Left rostral anterior cingulate cortex | 0.019 | 0.001  | 0.481 | 0.912 | 1394 |
| Left lateral occipital cortex          | 0.025 | 0.001  | 0.361 | 0.912 | 1403 |
| Right lateral orbitofrontal cortex     | 0.027 | 0.001  | 0.316 | 0.912 | 1418 |
| Right superior frontal gyrus           | 0.031 | 0.001  | 0.247 | 0.912 | 1399 |
| Left entorhinal cortex                 | 0.033 | 0.001  | 0.243 | 0.912 | 1307 |
| Right rostral middle frontal gyrus     | 0.035 | <0.001 | 0.193 | 0.912 | 1414 |
| Left rostral middle frontal gyrus      | 0.040 | 0.001  | 0.138 | 0.912 | 1407 |
| Left lateral orbitofrontal cortex      | 0.058 | 0.001  | 0.032 | 0.449 | 1415 |
| Right entorhinal cortex                | 0.074 | 0.002  | 0.009 | 0.449 | 1264 |

**TABLE S23b:** Full mega-analytic results for surface area of each structure for the age of onset regression analysis in adult OCD patients, controlling for age, sex, scan center and ICV. Correlation coefficient Pearsons r is reported.

|                                        | Pearson's r (AO) | Standard Error | P-value | FDR P-value | N patients |
|----------------------------------------|------------------|----------------|---------|-------------|------------|
| Left frontal pole                      | -0.079           | 0.119          | 0.012   | 0.297       | 1412       |
| Left caudal middle frontal gyrus       | -0.077           | 1.171          | 0.003   | 0.238       | 1399       |
| Right superior frontal gyrus           | -0.057           | 2.156          | 0.054   | 0.372       | 1398       |
| Right superiortempora gyrus            | -0.053           | 1.119          | 0.023   | 0.297       | 1303       |
| Right postcentral gyrus                | -0.052           | 1.355          | 0.035   | 0.297       | 1395       |
| Left postcentral gyrus                 | -0.052           | 1.437          | 0.030   | 0.297       | 1387       |
| Left pars opercularis                  | -0.051           | 0.869          | 0.023   | 0.297       | 1411       |
| Right caudal middle frontal gyrus      | -0.045           | 1.188          | 0.095   | 0.405       | 1406       |
| Right surface area                     | -0.045           | 17.016         | 0.021   | 1           | 1416       |
| Right insula                           | -0.043           | 0.762          | 0.022   | 0.297       | 1383       |
| Right precentral gyrus                 | -0.042           | 1.652          | 0.122   | 0.405       | 1377       |
| Right pars opercularis                 | -0.042           | 0.770          | 0.093   | 0.405       | 1399       |
| Left insula                            | -0.042           | 0.703          | 0.035   | 0.297       | 1393       |
| Left surface area                      | -0.040           | 16.829         | 0.030   | 1           | 1418       |
| Left paracentral lobule                | -0.039           | 0.575          | 0.308   | 0.538       | 1410       |
| Left superiortempora gyrus             | -0.039           | 1.301          | 0.100   | 0.405       | 1257       |
| Left isthmus cingulate cortex          | -0.038           | 0.551          | 0.205   | 0.511       | 1412       |
| Left lateral occipital cortex          | -0.038           | 1.658          | 0.116   | 0.405       | 1402       |
| Right pars triangularis                | -0.036           | 0.799          | 0.081   | 0.405       | 1391       |
| Left medial orbitofrontal cortex       | -0.034           | 0.726          | 0.145   | 0.429       | 1410       |
| Right caudal anterior cingulate cortex | -0.034           | 0.504          | 0.129   | 0.405       | 1402       |
| Right banks superior temporal sulcus   | -0.033           | 0.464          | 0.055   | 0.372       | 1322       |
| Right entorhinal cortex                | -0.032           | 0.317          | 0.278   | 0.519       | 1263       |
| Right isthmus cingulate cortex         | -0.032           | 0.499          | 0.271   | 0.519       | 1417       |
| Right lateral occipital cortex         | -0.031           | 1.746          | 0.178   | 0.478       | 1402       |

|                                       |        |       |       |       |      |
|---------------------------------------|--------|-------|-------|-------|------|
| Left lateral orbitofrontal cortex     | -0.031 | 0.835 | 0.131 | 0.405 | 1414 |
| Left rostral middle frontal gyrus     | -0.030 | 2.013 | 0.108 | 0.405 | 1406 |
| Left pars triangularis                | -0.030 | 0.639 | 0.152 | 0.432 | 1412 |
| Right rostral middle frontal gyrus    | -0.030 | 2.028 | 0.109 | 0.405 | 1413 |
| Right lateral orbitofrontal cortex    | -0.029 | 0.906 | 0.239 | 0.519 | 1417 |
| Right middle temporal gyrus           | -0.029 | 1.157 | 0.066 | 0.405 | 1388 |
| Right superior parietal cortex        | -0.024 | 1.822 | 0.298 | 0.534 | 1388 |
| Right medial orbitofrontal cortex     | -0.023 | 0.606 | 0.183 | 0.478 | 1408 |
| Left banks superior temporal sulcus   | -0.023 | 0.565 | 0.250 | 0.519 | 1290 |
| Right frontal pole                    | -0.022 | 0.154 | 0.623 | 0.825 | 1415 |
| Left lingual gyrus                    | -0.021 | 1.282 | 0.111 | 0.405 | 1410 |
| Right paracentral lobule              | -0.020 | 0.699 | 0.604 | 0.825 | 1413 |
| Left pars orbitalis                   | -0.020 | 0.258 | 0.384 | 0.622 | 1411 |
| Right posterior cingulate cortex      | -0.020 | 0.588 | 0.331 | 0.563 | 1412 |
| Left inferior temporal cortex gyrus   | -0.019 | 1.413 | 0.233 | 0.519 | 1391 |
| Left precentral gyrus                 | -0.017 | 1.510 | 0.482 | 0.728 | 1392 |
| Left superior frontal gyrus           | -0.017 | 2.192 | 0.621 | 0.825 | 1366 |
| Left inferior parietal cortex         | -0.016 | 1.933 | 0.233 | 0.519 | 1357 |
| Right fusiform gyrus                  | -0.016 | 1.212 | 0.369 | 0.611 | 1390 |
| Left middle temporal gyrus            | -0.014 | 1.180 | 0.279 | 0.519 | 1300 |
| Left cuneus                           | -0.012 | 0.654 | 0.282 | 0.519 | 1386 |
| Right lingual gyrus                   | -0.012 | 1.260 | 0.210 | 0.511 | 1412 |
| Left precuneus                        | -0.010 | 1.275 | 0.447 | 0.691 | 1414 |
| Left entorhinal cortex                | -0.009 | 0.272 | 0.723 | 0.863 | 1307 |
| Right parahippocampal gyrus           | -0.009 | 0.329 | 0.560 | 0.811 | 1410 |
| Left caudal anterior cingulate cortex | -0.008 | 0.456 | 0.655 | 0.825 | 1393 |
| Right precuneus                       | -0.007 | 1.376 | 0.649 | 0.825 | 1411 |
| Left fusiform gyrus                   | -0.006 | 1.278 | 0.592 | 0.825 | 1409 |
| Right inferior parietal cortex        | -0.004 | 2.147 | 0.513 | 0.759 | 1375 |

|                                         |        |       |       |       |      |
|-----------------------------------------|--------|-------|-------|-------|------|
| Left transverse temporal gyrus          | -0.002 | 0.256 | 0.635 | 0.825 | 1413 |
| Right pars orbitalis                    | 0.002  | 0.326 | 0.886 | 0.948 | 1415 |
| Left parahippocampal gyrus              | 0.003  | 0.355 | 0.905 | 0.948 | 1409 |
| Left temporal pole                      | 0.004  | 0.208 | 0.830 | 0.939 | 1413 |
| Left rostral anterior cingulate cortex  | 0.006  | 0.466 | 0.893 | 0.948 | 1393 |
| Right rostral anterior cingulate cortex | 0.007  | 0.436 | 0.967 | 0.981 | 1396 |
| Left supramarginal gyrus                | 0.009  | 1.689 | 0.921 | 0.949 | 1297 |
| Left superior parietal cortex           | 0.009  | 1.904 | 0.803 | 0.926 | 1392 |
| Left pericalcarine gyrus                | 0.014  | 0.724 | 0.723 | 0.863 | 1402 |
| Right transverse temporal gyrus         | 0.014  | 0.188 | 0.842 | 0.939 | 1416 |
| Right supramarginal gyrus               | 0.019  | 1.611 | 0.675 | 0.835 | 1321 |
| Right inferior temporal cortex gyrus    | 0.020  | 1.384 | 0.906 | 0.948 | 1408 |
| Right cuneus                            | 0.025  | 0.657 | 0.764 | 0.896 | 1384 |
| Left posterior cingulate cortex         | 0.027  | 0.534 | 0.414 | 0.654 | 1412 |
| Right temporal pole                     | 0.028  | 0.211 | 0.282 | 0.519 | 1393 |
| Right pericalcarine gyrus               | 0.029  | 0.777 | 0.985 | 0.985 | 1397 |

**TABLE S24a:** Full mega-analytic results for the cortical thickness of each structure for the age of onset regression analysis in pediatric OCD patients, controlling for age, sex and scan center. Correlation coefficient Pearsons r is reported.

|                                             | <b>Pearson's r (AO)</b> | <b>Standard Error</b> | <b>P-value</b> | <b>FDR P-value</b> | <b>N patients</b> |
|---------------------------------------------|-------------------------|-----------------------|----------------|--------------------|-------------------|
| <b>Left transverse temporal cortex</b>      | -0.168                  | 0.006                 | 0.005          | 0.258              | 289               |
| <b>Left fusiform gyrus</b>                  | -0.155                  | 0.004                 | 0.010          | 0.258              | 286               |
| <b>Right lateral occipital cortex</b>       | -0.153                  | 0.003                 | 0.011          | 0.258              | 286               |
| <b>Right inferior temporal cortex gyrus</b> | -0.149                  | 0.005                 | 0.015          | 0.258              | 278               |
| <b>Left middle temporal gyrus</b>           | -0.139                  | 0.005                 | 0.025          | 0.288              | 272               |
| <b>Left inferior temporal cortex gyrus</b>  | -0.134                  | 0.005                 | 0.027          | 0.288              | 280               |
| <b>Right pars opercularis</b>               | -0.128                  | 0.005                 | 0.034          | 0.288              | 283               |
| <b>Right inferior parietal cortex</b>       | -0.125                  | 0.004                 | 0.042          | 0.288              | 275               |
| <b>Right cuneus</b>                         | -0.122                  | 0.004                 | 0.042          | 0.288              | 286               |
| <b>Left postcentral gyrus</b>               | -0.120                  | 0.003                 | 0.051          | 0.288              | 275               |
| <b>Right cortical thickness</b>             | -0.119                  | 0.003                 | 0.048          | 0.288              | 289               |
| <b>Left lateral orbitofrontal cortex</b>    | -0.118                  | 0.005                 | 0.049          | 0.288              | 288               |
| <b>Left cortical thickness</b>              | -0.116                  | 0.003                 | 0.053          | 0.288              | 289               |
| <b>Left inferior parietal cortex</b>        | -0.113                  | 0.004                 | 0.068          | 0.319              | 269               |
| <b>Left cuneus</b>                          | -0.112                  | 0.003                 | 0.063          | 0.316              | 285               |
| <b>Left banks superior temporal sulcus</b>  | -0.109                  | 0.005                 | 0.091          | 0.397              | 253               |
| <b>Right middle temporal gyrus</b>          | -0.101                  | 0.005                 | 0.101          | 0.397              | 277               |
| <b>Left superior temporal gyrus</b>         | -0.100                  | 0.005                 | 0.113          | 0.397              | 264               |
| <b>Left lingual gyrus</b>                   | -0.098                  | 0.003                 | 0.103          | 0.397              | 286               |
| <b>Right pars triangularis</b>              | -0.097                  | 0.005                 | 0.109          | 0.397              | 286               |
| <b>Left supramarginal gyrus</b>             | -0.093                  | 0.004                 | 0.139          | 0.431              | 266               |
| <b>Right postcentral gyrus</b>              | -0.091                  | 0.003                 | 0.138          | 0.431              | 278               |
| <b>Right fusiform gyrus</b>                 | -0.087                  | 0.004                 | 0.151          | 0.431              | 284               |
| <b>Right pars orbitalis</b>                 | -0.086                  | 0.006                 | 0.155          | 0.431              | 286               |
| <b>Left precuneus</b>                       | -0.086                  | 0.004                 | 0.156          | 0.431              | 285               |

|                                        |        |       |       |       |     |
|----------------------------------------|--------|-------|-------|-------|-----|
| Right supramarginal gyrus              | -0.085 | 0.004 | 0.170 | 0.431 | 274 |
| Right insula                           | -0.084 | 0.005 | 0.174 | 0.431 | 276 |
| Left frontal pole                      | -0.083 | 0.010 | 0.167 | 0.431 | 287 |
| Left insula                            | -0.081 | 0.004 | 0.186 | 0.431 | 280 |
| Right caudal middle frontal gyrus      | -0.081 | 0.005 | 0.183 | 0.431 | 284 |
| Left pars opercularis                  | -0.080 | 0.004 | 0.191 | 0.431 | 282 |
| Left superior parietal cortex          | -0.077 | 0.004 | 0.205 | 0.435 | 285 |
| Right lateral orbitofrontal cortex     | -0.076 | 0.004 | 0.205 | 0.435 | 289 |
| Right banks superior temporal sulcus   | -0.074 | 0.005 | 0.238 | 0.450 | 267 |
| Left lateral occipital cortex          | -0.074 | 0.003 | 0.218 | 0.447 | 286 |
| Right rostral middle frontal gyrus     | -0.073 | 0.004 | 0.230 | 0.447 | 286 |
| Right parahippocampal gyrus            | -0.073 | 0.007 | 0.226 | 0.447 | 285 |
| Right temporal pole                    | -0.070 | 0.011 | 0.251 | 0.462 | 285 |
| Left pars triangularis                 | -0.065 | 0.005 | 0.279 | 0.501 | 285 |
| Left medial orbitofrontal cortex       | -0.061 | 0.005 | 0.312 | 0.538 | 284 |
| Right frontal pole                     | -0.060 | 0.009 | 0.321 | 0.538 | 289 |
| Right posterior cingulate cortex       | -0.060 | 0.004 | 0.323 | 0.538 | 285 |
| Left rostral middle frontal gyrus      | -0.057 | 0.004 | 0.346 | 0.563 | 288 |
| Right precuneus                        | -0.056 | 0.004 | 0.355 | 0.565 | 282 |
| Left pericalcarine gyrus               | -0.054 | 0.004 | 0.370 | 0.576 | 285 |
| Right caudal anterior cingulate cortex | -0.051 | 0.007 | 0.404 | 0.598 | 284 |
| Right superior temporal gyrus          | -0.051 | 0.005 | 0.410 | 0.598 | 272 |
| Right transverse temporal cortex       | -0.050 | 0.006 | 0.407 | 0.598 | 288 |
| Left paracentral lobule                | -0.047 | 0.005 | 0.436 | 0.623 | 286 |
| Left rostral anterior cingulate cortex | -0.046 | 0.008 | 0.456 | 0.624 | 278 |
| Right medial orbitofrontal cortex      | -0.045 | 0.005 | 0.460 | 0.624 | 283 |
| Right paracentral lobule               | -0.040 | 0.004 | 0.513 | 0.673 | 286 |
| Right superior frontal gyrus           | -0.039 | 0.005 | 0.529 | 0.673 | 279 |
| Left parahippocampal gyrus             | -0.038 | 0.007 | 0.527 | 0.673 | 285 |



|                                         |        |       |       |       |     |
|-----------------------------------------|--------|-------|-------|-------|-----|
| Right lingual gyrus                     | -0.035 | 0.003 | 0.565 | 0.707 | 288 |
| Right superior parietal cortex          | -0.032 | 0.004 | 0.602 | 0.727 | 284 |
| Right isthmus cingulate cortex          | -0.029 | 0.006 | 0.634 | 0.739 | 284 |
| Left isthmus cingulate cortex           | -0.025 | 0.006 | 0.683 | 0.784 | 284 |
| Left superior frontal gyrus             | -0.022 | 0.005 | 0.721 | 0.797 | 280 |
| Left pars orbitalis                     | -0.021 | 0.007 | 0.728 | 0.797 | 288 |
| Left temporal pole                      | -0.020 | 0.012 | 0.747 | 0.804 | 284 |
| Right entorhinal cortex                 | -0.014 | 0.010 | 0.838 | 0.889 | 241 |
| Left entorhinal cortex                  | -0.009 | 0.009 | 0.887 | 0.913 | 260 |
| Right rostral anterior cingulate cortex | 0.002  | 0.007 | 0.972 | 0.972 | 281 |
| Right pericalcarine gyrus               | 0.006  | 0.004 | 0.927 | 0.941 | 287 |
| Left posterior cingulate cortex         | 0.009  | 0.005 | 0.884 | 0.913 | 288 |
| Left caudal anterior cingulate cortex   | 0.023  | 0.008 | 0.709 | 0.797 | 282 |
| Left caudal middle frontal gyrus        | 0.030  | 0.005 | 0.623 | 0.739 | 288 |
| Right precentral gyrus                  | 0.034  | 0.004 | 0.582 | 0.714 | 280 |
| Left precentral gyrus                   | 0.045  | 0.004 | 0.464 | 0.624 | 281 |

**TABLE S24b:** Full mega-analytic results for the surface area of each structure for the age of onset regression analysis in pediatric OCD patients, controlling for age, sex, scan center and ICV. Correlation coefficient Pearsons r is reported.

|                                         | <b>Pearson's r (AO)</b> | <b>Standard Error</b> | <b>P-value</b> | <b>FDR P-value</b> | <b>N patients</b> |
|-----------------------------------------|-------------------------|-----------------------|----------------|--------------------|-------------------|
| Right rostral anterior cingulate cortex | -0.109                  | 3.391                 | 0.073          | 0.928              | 281               |
| Left caudal anterior cingulate cortex   | -0.090                  | 3.459                 | 0.140          | 0.928              | 282               |
| Left precentral gyrus                   | -0.084                  | 10.607                | 0.169          | 0.928              | 281               |
| Left posterior cingulate cortex         | -0.078                  | 4.209                 | 0.197          | 0.928              | 288               |
| Left inferior temporal cortex gyrus     | -0.076                  | 10.230                | 0.215          | 0.928              | 280               |
| Left pericalcarine gyrus                | -0.066                  | 5.530                 | 0.276          | 0.928              | 285               |
| Left paracentral lobule                 | -0.062                  | 4.445                 | 0.308          | 0.928              | 286               |
| Right middle temporal gyrus             | -0.056                  | 8.972                 | 0.361          | 0.928              | 277               |
| Left inferior parietal cortex           | -0.052                  | 13.501                | 0.410          | 0.928              | 269               |
| Left cuneus                             | -0.051                  | 4.758                 | 0.400          | 0.928              | 285               |
| Right posterior cingulate cortex        | -0.048                  | 3.937                 | 0.430          | 0.928              | 285               |
| Right inferior temporal cortex gyrus    | -0.041                  | 10.124                | 0.506          | 0.928              | 278               |
| Left medial orbitofrontal cortex        | -0.031                  | 5.534                 | 0.611          | 0.928              | 284               |
| Right superior parietal cortex          | -0.031                  | 14.070                | 0.608          | 0.928              | 284               |
| Right precentral gyrus                  | -0.027                  | 10.488                | 0.654          | 0.928              | 280               |
| Right insula                            | -0.026                  | 5.504                 | 0.675          | 0.928              | 276               |
| Left fusiform gyrus                     | -0.024                  | 9.235                 | 0.694          | 0.928              | 286               |
| Right paracentral lobule                | -0.022                  | 5.424                 | 0.715          | 0.928              | 286               |
| Right precuneus                         | -0.021                  | 10.771                | 0.728          | 0.928              | 282               |
| Right lateral occipital cortex          | -0.020                  | 13.054                | 0.737          | 0.928              | 286               |
| Left rostral middle frontal gyrus       | -0.012                  | 15.135                | 0.846          | 0.949              | 288               |
| Left lateral occipital cortex           | -0.012                  | 12.436                | 0.841          | 0.949              | 286               |
| Right entorhinal cortex                 | -0.010                  | 2.044                 | 0.880          | 0.949              | 241               |
| Right pars triangularis                 | -0.010                  | 5.532                 | 0.864          | 0.949              | 286               |
| Left supramarginal gyrus                | -0.008                  | 13.137                | 0.895          | 0.949              | 266               |

|                                        |        |         |       |       |     |
|----------------------------------------|--------|---------|-------|-------|-----|
| Right lateral orbitofrontal cortex     | -0.007 | 7.154   | 0.904 | 0.949 | 289 |
| Right caudal anterior cingulate cortex | -0.005 | 3.432   | 0.935 | 0.963 | 284 |
| Left lingual gyrus                     | -0.003 | 9.448   | 0.964 | 0.972 | 286 |
| Right pericalcarine gyrus              | -0.002 | 5.671   | 0.972 | 0.972 | 287 |
| Right frontal pole                     | 0.007  | 1.094   | 0.907 | 0.949 | 289 |
| Right supramarginal gyrus              | 0.008  | 12.329  | 0.895 | 0.949 | 274 |
| Left middle temporal gyrus             | 0.011  | 7.886   | 0.862 | 0.949 | 272 |
| Right temporal pole                    | 0.016  | 1.516   | 0.797 | 0.949 | 285 |
| Left precuneus                         | 0.017  | 10.181  | 0.773 | 0.949 | 285 |
| Left pars orbitalis                    | 0.020  | 1.975   | 0.736 | 0.928 | 288 |
| Right cuneus                           | 0.022  | 5.015   | 0.712 | 0.928 | 286 |
| Right caudal middle frontal gyrus      | 0.023  | 8.559   | 0.700 | 0.928 | 284 |
| Right surface area                     | 0.023  | 131.796 | 0.701 | 1.000 | 289 |
| Right postcentral gyrus                | 0.024  | 10.446  | 0.695 | 0.928 | 278 |
| Right parahippocampal gyrus            | 0.025  | 2.574   | 0.681 | 0.928 | 285 |
| Left postcentral gyrus                 | 0.025  | 10.164  | 0.687 | 0.928 | 275 |
| Left pars triangularis                 | 0.026  | 4.606   | 0.671 | 0.928 | 285 |
| Left surface area                      | 0.028  | 127.908 | 0.644 | 1.000 | 289 |
| Right pars orbitalis                   | 0.029  | 2.406   | 0.632 | 0.928 | 286 |
| Right inferior parietal cortex         | 0.029  | 15.646  | 0.642 | 0.928 | 275 |
| Right medial orbitofrontal cortex      | 0.031  | 4.815   | 0.608 | 0.928 | 283 |
| Left parahippocampal gyrus             | 0.033  | 2.488   | 0.588 | 0.928 | 285 |
| Right lingual gyrus                    | 0.038  | 9.170   | 0.528 | 0.928 | 288 |
| Right rostral middle frontal gyrus     | 0.040  | 16.066  | 0.508 | 0.928 | 286 |
| Left superior frontal gyrus            | 0.041  | 15.658  | 0.499 | 0.928 | 280 |
| Right fusiform gyrus                   | 0.042  | 8.577   | 0.486 | 0.928 | 284 |
| Right isthmus cingulate cortex         | 0.042  | 3.630   | 0.494 | 0.928 | 284 |
| Left insula                            | 0.044  | 5.632   | 0.473 | 0.928 | 280 |
| Left rostral anterior cingulate cortex | 0.044  | 3.798   | 0.478 | 0.928 | 278 |

|                                      |       |        |       |       |     |
|--------------------------------------|-------|--------|-------|-------|-----|
| Right banks superior temporal sulcus | 0.045 | 3.553  | 0.472 | 0.928 | 267 |
| Left isthmus cingulate cortex        | 0.050 | 4.018  | 0.414 | 0.928 | 284 |
| Left lateral orbitofrontal cortex    | 0.051 | 7.306  | 0.397 | 0.928 | 288 |
| Left caudal middle frontal gyrus     | 0.052 | 8.463  | 0.388 | 0.928 | 288 |
| Left pars opercularis                | 0.052 | 6.332  | 0.396 | 0.928 | 282 |
| Left superior parietal cortex        | 0.056 | 14.535 | 0.355 | 0.928 | 285 |
| Right superior temporal gyrus        | 0.057 | 8.914  | 0.360 | 0.928 | 272 |
| Left banks superior temporal sulcus  | 0.058 | 4.197  | 0.373 | 0.928 | 253 |
| Left temporal pole                   | 0.060 | 1.654  | 0.321 | 0.928 | 284 |
| Left transverse temporal cortex      | 0.065 | 1.788  | 0.277 | 0.928 | 289 |
| Right superior frontal gyrus         | 0.072 | 17.572 | 0.238 | 0.928 | 279 |
| Left entorhinal cortex               | 0.078 | 1.836  | 0.220 | 0.928 | 260 |
| Right transverse temporal cortex     | 0.088 | 1.561  | 0.145 | 0.928 | 288 |
| Right pars opercularis               | 0.093 | 5.217  | 0.127 | 0.928 | 283 |
| Left frontal pole                    | 0.111 | 0.920  | 0.067 | 0.928 | 287 |
| Left superior temporal gyrus         | 0.138 | 9.813  | 0.028 | 0.928 | 264 |

**TABLE S25a:** Full mega-analytic results for the association between illness duration and the cortical thickness of each structure in adult OCD patients, controlling for age, sex and scan center. Correlation coefficient Pearsons r is reported.

|                                        | <b>Pearson's r<sup>a</sup><br/>(Dur)</b> | <b>Standard Error</b> | <b>P-value</b> | <b>FDR P-value</b> | <b>N patients</b> |
|----------------------------------------|------------------------------------------|-----------------------|----------------|--------------------|-------------------|
| Right entorhinal cortex                | -0.080                                   | 0.002                 | 0.005          | 0.335              | 1265              |
| Left lateral orbitofrontal cortex      | -0.056                                   | 0.001                 | 0.038          | 0.577              | 1416              |
| Left rostral middle frontal gyrus      | -0.049                                   | <0.001                | 0.066          | 0.577              | 1408              |
| Right rostral middle frontal gyrus     | -0.044                                   | <0.001                | 0.105          | 0.668              | 1415              |
| Left entorhinal cortex                 | -0.034                                   | 0.001                 | 0.227          | 0.917              | 1308              |
| Right superior frontal gyrus           | -0.031                                   | 0.001                 | 0.244          | 0.917              | 1400              |
| Right lateral orbitofrontal cortex     | -0.025                                   | 0.001                 | 0.355          | 0.917              | 1419              |
| Left lateral occipital cortex          | -0.023                                   | 0.001                 | 0.399          | 0.917              | 1404              |
| Right frontal pole                     | -0.023                                   | 0.001                 | 0.391          | 0.917              | 1417              |
| Left rostral anterior cingulate cortex | -0.019                                   | 0.001                 | 0.482          | 0.917              | 1395              |
| Left superior frontal gyrus            | -0.017                                   | 0.001                 | 0.537          | 0.917              | 1368              |
| Right lateral occipital cortex         | -0.016                                   | 0.001                 | 0.558          | 0.917              | 1404              |
| Right isthmus cingulate cortex         | -0.016                                   | 0.001                 | 0.543          | 0.917              | 1419              |
| Right inferior temporal cortex gyrus   | -0.012                                   | 0.001                 | 0.662          | 0.917              | 1410              |
| Left isthmus cingulate cortex          | -0.011                                   | 0.001                 | 0.670          | 0.917              | 1414              |
| Left transverse temporal cortex        | -0.008                                   | 0.001                 | 0.763          | 0.958              | 1415              |
| Right insula                           | -0.007                                   | 0.001                 | 0.787          | 0.958              | 1385              |
| Left frontal pole                      | -0.006                                   | 0.001                 | 0.833          | 0.958              | 1414              |
| Right pars triangularis                | -0.005                                   | 0.001                 | 0.856          | 0.958              | 1393              |
| Left medial orbitofrontal cortex       | -0.005                                   | 0.001                 | 0.841          | 0.958              | 1412              |
| Right medial orbitofrontal cortex      | -0.004                                   | 0.001                 | 0.876          | 0.958              | 1409              |
| Left temporal pole                     | -0.003                                   | 0.001                 | 0.919          | 0.975              | 1415              |
| Left insula                            | -0.002                                   | 0.001                 | 0.940          | 0.975              | 1395              |
| Right temporal pole                    | -0.002                                   | 0.001                 | 0.933          | 0.975              | 1394              |
| Right cuneus                           | <0.001                                   | 0.001                 | 0.990          | 0.990              | 1386              |

|                                         |        |        |       |       |      |
|-----------------------------------------|--------|--------|-------|-------|------|
| Left caudal middle frontal gyrus        | <0.001 | 0.001  | 0.989 | 0.990 | 1401 |
| Left pars orbitalis                     | 0.002  | 0.001  | 0.947 | 0.975 | 1413 |
| Left inferior temporal cortex gyrus     | 0.004  | 0.001  | 0.869 | 0.958 | 1393 |
| Left superior parietal cortex           | 0.005  | <0.001 | 0.852 | 0.958 | 1394 |
| Left cortical thickness                 | 0.007  | <0.001 | 0.780 | 0.958 | 1420 |
| Right superior parietal cortex          | 0.007  | <0.001 | 0.799 | 0.958 | 1390 |
| Right cortical thickness                | 0.008  | <0.001 | 0.753 | 0.958 | 1417 |
| Right paracentral lobule                | 0.008  | 0.001  | 0.758 | 0.958 | 1415 |
| Right pars opercularis                  | 0.011  | 0.001  | 0.673 | 0.917 | 1400 |
| Left pars triangularis                  | 0.011  | 0.001  | 0.679 | 0.917 | 1414 |
| Right pericalcarine gyrus               | 0.011  | <0.001 | 0.681 | 0.917 | 1399 |
| Left cuneus                             | 0.012  | <0.001 | 0.649 | 0.917 | 1388 |
| Right precuneus                         | 0.012  | 0.001  | 0.652 | 0.917 | 1413 |
| Left lingual gyrus                      | 0.013  | <0.001 | 0.633 | 0.917 | 1412 |
| Right caudal middle frontal gyrus       | 0.013  | 0.001  | 0.637 | 0.917 | 1408 |
| Right fusiform gyrus                    | 0.014  | 0.001  | 0.596 | 0.917 | 1392 |
| Right caudal anterior cingulate cortex  | 0.014  | 0.001  | 0.596 | 0.917 | 1404 |
| Right posterior cingulate cortex        | 0.015  | 0.001  | 0.574 | 0.917 | 1414 |
| Left parahippocampal gyrus              | 0.015  | 0.001  | 0.588 | 0.917 | 1411 |
| Left banks superior temporal sulcus     | 0.016  | 0.001  | 0.577 | 0.917 | 1292 |
| Right supramarginal gyrus               | 0.016  | 0.001  | 0.573 | 0.917 | 1323 |
| Left pars opercularis                   | 0.016  | 0.001  | 0.563 | 0.917 | 1413 |
| Right lingual gyrus                     | 0.017  | <0.001 | 0.519 | 0.917 | 1414 |
| Right parahippocampal gyrus             | 0.017  | 0.001  | 0.539 | 0.917 | 1412 |
| Left superior temporal gyrus            | 0.019  | 0.001  | 0.495 | 0.917 | 1259 |
| Right inferior parietal cortex          | 0.019  | 0.001  | 0.478 | 0.917 | 1377 |
| Right rostral anterior cingulate cortex | 0.020  | 0.001  | 0.448 | 0.917 | 1397 |
| Left caudal anterior cingulate cortex   | 0.021  | 0.001  | 0.447 | 0.917 | 1395 |
| Right pars orbitalis                    | 0.022  | 0.001  | 0.404 | 0.917 | 1417 |

|                                      |       |        |       |       |      |
|--------------------------------------|-------|--------|-------|-------|------|
| Right middle temporal gyrus          | 0.024 | 0.001  | 0.375 | 0.917 | 1389 |
| Left inferior parietal cortex        | 0.024 | 0.001  | 0.388 | 0.917 | 1359 |
| Left fusiform gyrus                  | 0.025 | 0.001  | 0.346 | 0.917 | 1411 |
| Left middle temporal gyrus           | 0.025 | 0.001  | 0.368 | 0.917 | 1302 |
| Left paracentral lobule              | 0.025 | 0.001  | 0.352 | 0.917 | 1412 |
| Left postcentral gyrus               | 0.027 | <0.001 | 0.316 | 0.917 | 1389 |
| Left pericalcarine gyrus             | 0.028 | <0.001 | 0.296 | 0.917 | 1404 |
| Right precentral gyrus               | 0.037 | 0.001  | 0.169 | 0.912 | 1379 |
| Left posterior cingulate cortex      | 0.042 | 0.001  | 0.121 | 0.705 | 1414 |
| Left supramarginal gyrus             | 0.048 | 0.001  | 0.089 | 0.624 | 1299 |
| Left precuneus                       | 0.048 | <0.001 | 0.076 | 0.592 | 1416 |
| Left precentral gyrus                | 0.050 | 0.001  | 0.063 | 0.577 | 1394 |
| Right superior temporal gyrus        | 0.053 | 0.001  | 0.058 | 0.577 | 1305 |
| Right banks superior temporal sulcus | 0.055 | 0.001  | 0.047 | 0.577 | 1324 |
| Right transverse temporal cortex     | 0.058 | 0.001  | 0.031 | 0.577 | 1418 |
| Right postcentral gyrus              | 0.061 | <0.001 | 0.024 | 0.577 | 1397 |

**TABLE S25b:** Full mega-analytic results for the association between illness duration and the surface area of each structure in adult OCD patients, controlling for age, sex, scan center and ICV. Correlation coefficient Pearsons r is reported.

|                                         | Pearson's r<br>(Dur) | Standard Error | P-value | FDR P-value | N patients |
|-----------------------------------------|----------------------|----------------|---------|-------------|------------|
| Right pericalcarine gyrus               | -0.041               | 0.771          | 0.620   | 0.753       | 1398       |
| Right cuneus                            | -0.031               | 0.654          | 0.564   | 0.725       | 1385       |
| Right temporal pole                     | -0.027               | 0.210          | 0.302   | 0.541       | 1393       |
| Left posterior cingulate cortex         | -0.026               | 0.531          | 0.421   | 0.665       | 1413       |
| Left pericalcarine gyrus                | -0.020               | 0.720          | 0.938   | 0.966       | 1403       |
| Right inferior temporal cortex gyrus    | -0.019               | 1.376          | 0.922   | 0.964       | 1409       |
| Right transverse temporal gyrus         | -0.014               | 0.187          | 0.828   | 0.908       | 1417       |
| Right supramarginal gyrus               | -0.014               | 1.601          | 0.789   | 0.897       | 1322       |
| Left rostral anterior cingulate cortex  | -0.014               | 0.464          | 0.880   | 0.935       | 1394       |
| Left supramarginal gyrus                | -0.003               | 1.680          | 0.768   | 0.897       | 1298       |
| Left superior parietal cortex           | -0.002               | 1.898          | 1.000   | 1.000       | 1393       |
| Left cuneus                             | -0.001               | 0.652          | 0.576   | 0.725       | 1387       |
| Left parahippocampal gyrus              | -0.001               | 0.353          | 0.841   | 0.908       | 1410       |
| Left temporal pole                      | 0.001                | 0.207          | 0.960   | 0.975       | 1414       |
| Right pars orbitalis                    | 0.001                | 0.323          | 0.805   | 0.897       | 1416       |
| Right inferior parietal cortex          | 0.002                | 2.135          | 0.569   | 0.725       | 1376       |
| Left caudal anterior cingulate cortex   | 0.003                | 0.454          | 0.802   | 0.897       | 1394       |
| Right rostral anterior cingulate cortex | 0.004                | 0.433          | 0.657   | 0.783       | 1397       |
| Left transverse temporal gyrus          | 0.006                | 0.255          | 0.550   | 0.725       | 1414       |
| Left inferior parietal cortex           | 0.008                | 1.923          | 0.396   | 0.641       | 1358       |
| Left fusiform gyrus                     | 0.008                | 1.270          | 0.532   | 0.725       | 1410       |
| Left middle temporal gyrus              | 0.009                | 1.175          | 0.382   | 0.634       | 1301       |
| Left precuneus                          | 0.009                | 1.267          | 0.478   | 0.717       | 1415       |
| Right lingual gyrus                     | 0.010                | 1.252          | 0.248   | 0.528       | 1413       |



|                                      |       |       |       |       |      |
|--------------------------------------|-------|-------|-------|-------|------|
| Right parahippocampal gyrus          | 0.012 | 0.327 | 0.496 | 0.717 | 1411 |
| Right precuneus                      | 0.013 | 1.368 | 0.511 | 0.724 | 1412 |
| Left entorhinal cortex               | 0.014 | 0.271 | 0.596 | 0.737 | 1308 |
| Left precentral gyrus                | 0.018 | 1.503 | 0.457 | 0.707 | 1393 |
| Right posterior cingulate cortex     | 0.018 | 0.584 | 0.367 | 0.634 | 1413 |
| Left lingual gyrus                   | 0.019 | 1.274 | 0.146 | 0.453 | 1411 |
| Right fusiform gyrus                 | 0.020 | 1.204 | 0.285 | 0.538 | 1391 |
| Right paracentral lobule             | 0.021 | 0.695 | 0.575 | 0.725 | 1414 |
| Left inferior temporal cortex gyrus  | 0.021 | 1.404 | 0.199 | 0.488 | 1392 |
| Left pars triangularis               | 0.022 | 0.635 | 0.264 | 0.528 | 1413 |
| Right medial orbitofrontal cortex    | 0.022 | 0.602 | 0.197 | 0.488 | 1409 |
| Left banks superior temporal sulcus  | 0.022 | 0.563 | 0.258 | 0.528 | 1291 |
| Right superior parietal cortex       | 0.024 | 1.813 | 0.302 | 0.541 | 1389 |
| Right lateral occipital cortex       | 0.024 | 1.736 | 0.277 | 0.538 | 1403 |
| Right isthmus cingulate cortex       | 0.026 | 0.496 | 0.381 | 0.634 | 1418 |
| Left pars orbitalis                  | 0.027 | 0.257 | 0.264 | 0.528 | 1412 |
| Right frontal pole                   | 0.027 | 0.153 | 0.492 | 0.717 | 1416 |
| Right middle temporal gyrus          | 0.028 | 1.150 | 0.073 | 0.332 | 1389 |
| Left rostral middle frontal gyrus    | 0.030 | 2.001 | 0.110 | 0.414 | 1407 |
| Left lateral orbitofrontal cortex    | 0.032 | 0.830 | 0.124 | 0.421 | 1415 |
| Left medial orbitofrontal cortex     | 0.033 | 0.722 | 0.162 | 0.470 | 1411 |
| Right lateral orbitofrontal cortex   | 0.033 | 0.901 | 0.184 | 0.488 | 1418 |
| Right rostral middle frontal gyrus   | 0.033 | 2.016 | 0.086 | 0.365 | 1414 |
| Left superior frontal gyrus          | 0.034 | 2.178 | 0.262 | 0.528 | 1367 |
| Right banks superior temporal sulcus | 0.034 | 0.460 | 0.053 | 0.332 | 1323 |
| Left isthmus cingulate cortex        | 0.034 | 0.548 | 0.250 | 0.528 | 1413 |
| Right insula                         | 0.035 | 0.758 | 0.048 | 0.332 | 1384 |
| Left insula                          | 0.036 | 0.699 | 0.062 | 0.332 | 1394 |
| Right pars opercularis               | 0.037 | 0.765 | 0.137 | 0.443 | 1400 |

|                                               |       |        |       |       |      |
|-----------------------------------------------|-------|--------|-------|-------|------|
| <b>Left lateral occipital cortex</b>          | 0.037 | 1.648  | 0.121 | 0.421 | 1403 |
| <b>Right pars triangularis</b>                | 0.038 | 0.794  | 0.073 | 0.332 | 1392 |
| <b>Right entorhinal cortex</b>                | 0.038 | 0.315  | 0.201 | 0.488 | 1264 |
| <b>Left surface area</b>                      | 0.041 | 16.729 | 0.028 | 1.000 | 1419 |
| <b>Right caudal anterior cingulate cortex</b> | 0.043 | 0.501  | 0.066 | 0.332 | 1403 |
| <b>Right precentral gyrus</b>                 | 0.043 | 1.642  | 0.109 | 0.414 | 1378 |
| <b>Right surface area</b>                     | 0.045 | 16.917 | 0.021 | 1.000 | 1417 |
| <b>Right postcentral gyrus</b>                | 0.047 | 1.348  | 0.059 | 0.332 | 1396 |
| <b>Left pars opercularis</b>                  | 0.048 | 0.864  | 0.033 | 0.332 | 1412 |
| <b>Left superiortempora gyrus</b>             | 0.048 | 1.289  | 0.048 | 0.332 | 1258 |
| <b>Left paracentral lobule</b>                | 0.048 | 0.572  | 0.166 | 0.470 | 1411 |
| <b>Right caudal middle frontal gyrus</b>      | 0.051 | 1.181  | 0.061 | 0.332 | 1407 |
| <b>Left postcentral gyrus</b>                 | 0.055 | 1.434  | 0.024 | 0.332 | 1388 |
| <b>Right superiortempora gyrus</b>            | 0.058 | 1.110  | 0.014 | 0.332 | 1304 |
| <b>Right superior frontal gyrus</b>           | 0.059 | 2.143  | 0.045 | 0.332 | 1399 |
| <b>Left frontal pole</b>                      | 0.076 | 0.118  | 0.016 | 0.332 | 1413 |
| <b>Left caudal middle frontal gyrus</b>       | 0.079 | 1.163  | 0.003 | 0.184 | 1400 |

**TABLE S26a:** Full mega-analytic results for the association between illness duration and the cortical thickness of each structure in pediatric OCD patients, controlling for age, sex and scan center. Correlation coefficient Pearsons r is reported.

|                                         | <b>Pearson's r<br/>(Dur)</b> | <b>Standard Error</b> | <b>P-value</b> | <b>FDR P-value</b> | <b>N patients</b> |
|-----------------------------------------|------------------------------|-----------------------|----------------|--------------------|-------------------|
| Left precentral gyrus                   | -0.045                       | 0.004                 | 0.456          | 0.622              | 281               |
| Right precentral gyrus                  | -0.032                       | 0.004                 | 0.604          | 0.742              | 280               |
| Left caudal middle frontal gyrus        | -0.027                       | 0.005                 | 0.655          | 0.764              | 288               |
| Left caudal anterior cingulate cortex   | -0.019                       | 0.008                 | 0.750          | 0.808              | 282               |
| Left posterior cingulate cortex         | -0.007                       | 0.005                 | 0.906          | 0.941              | 288               |
| Right pericalcarine gyrus               | -0.004                       | 0.004                 | 0.943          | 0.956              | 287               |
| Right rostral anterior cingulate cortex | -0.001                       | 0.007                 | 0.983          | 0.983              | 281               |
| Left entorhinal cortex                  | 0.007                        | 0.009                 | 0.914          | 0.941              | 260               |
| Right entorhinal cortex                 | 0.011                        | 0.010                 | 0.863          | 0.915              | 241               |
| Left temporal pole                      | 0.020                        | 0.012                 | 0.736          | 0.805              | 284               |
| Left pars orbitalis                     | 0.020                        | 0.007                 | 0.735          | 0.805              | 288               |
| Left isthmus cingulate cortex           | 0.024                        | 0.006                 | 0.698          | 0.788              | 284               |
| Left superior frontal gyrus             | 0.025                        | 0.005                 | 0.688          | 0.788              | 280               |
| Right isthmus cingulate cortex          | 0.029                        | 0.006                 | 0.637          | 0.755              | 284               |
| Right lingual gyrus                     | 0.030                        | 0.003                 | 0.618          | 0.746              | 288               |
| Right superior parietal cortex          | 0.032                        | 0.004                 | 0.597          | 0.742              | 284               |
| Left parahippocampal gyrus              | 0.035                        | 0.008                 | 0.569          | 0.724              | 285               |
| Right paracentral lobule                | 0.039                        | 0.004                 | 0.521          | 0.676              | 286               |
| Right superior frontal gyrus            | 0.040                        | 0.005                 | 0.511          | 0.674              | 279               |
| Left paracentral lobule                 | 0.044                        | 0.005                 | 0.462          | 0.622              | 286               |
| Right medial orbitofrontal cortex       | 0.046                        | 0.005                 | 0.446          | 0.622              | 283               |
| Right caudal anterior cingulate cortex  | 0.046                        | 0.007                 | 0.452          | 0.622              | 284               |
| Left rostral anterior cingulate cortex  | 0.048                        | 0.008                 | 0.435          | 0.622              | 278               |
| Right transverse temporal cortex        | 0.049                        | 0.006                 | 0.414          | 0.616              | 288               |
| Left pericalcarine gyrus                | 0.053                        | 0.004                 | 0.382          | 0.581              | 285               |

|                                      |       |       |       |       |     |
|--------------------------------------|-------|-------|-------|-------|-----|
| Right superior temporal gyrus        | 0.055 | 0.005 | 0.379 | 0.581 | 272 |
| Right posterior cingulate cortex     | 0.056 | 0.004 | 0.352 | 0.560 | 285 |
| Left rostral middle frontal gyrus    | 0.058 | 0.004 | 0.331 | 0.548 | 288 |
| Right precuneus                      | 0.059 | 0.004 | 0.336 | 0.548 | 282 |
| Right frontal pole                   | 0.062 | 0.009 | 0.301 | 0.527 | 289 |
| Left medial orbitofrontal cortex     | 0.062 | 0.005 | 0.309 | 0.528 | 284 |
| Left pars triangularis               | 0.069 | 0.005 | 0.255 | 0.459 | 285 |
| Right temporal pole                  | 0.070 | 0.011 | 0.249 | 0.459 | 285 |
| Left lateral occipital cortex        | 0.072 | 0.003 | 0.234 | 0.445 | 286 |
| Right banks superior temporal sulcus | 0.074 | 0.005 | 0.235 | 0.445 | 267 |
| Right lateral orbitofrontal cortex   | 0.074 | 0.004 | 0.220 | 0.439 | 289 |
| Right parahippocampal gyrus          | 0.075 | 0.007 | 0.213 | 0.438 | 285 |
| Left superior parietal cortex        | 0.077 | 0.004 | 0.206 | 0.436 | 285 |
| Right rostral middle frontal gyrus   | 0.077 | 0.004 | 0.205 | 0.436 | 286 |
| Right caudal middle frontal gyrus    | 0.082 | 0.005 | 0.175 | 0.408 | 284 |
| Left insula                          | 0.082 | 0.004 | 0.181 | 0.409 | 280 |
| Left pars opercularis                | 0.083 | 0.004 | 0.171 | 0.408 | 282 |
| Left frontal pole                    | 0.085 | 0.010 | 0.160 | 0.408 | 287 |
| Right supramarginal gyrus            | 0.085 | 0.004 | 0.170 | 0.408 | 274 |
| Right fusiform gyrus                 | 0.086 | 0.004 | 0.158 | 0.408 | 284 |
| Right insula                         | 0.086 | 0.005 | 0.164 | 0.408 | 276 |
| Left precuneus                       | 0.088 | 0.004 | 0.144 | 0.408 | 285 |
| Right pars orbitalis                 | 0.088 | 0.006 | 0.144 | 0.408 | 286 |
| Right postcentral gyrus              | 0.091 | 0.003 | 0.138 | 0.408 | 278 |
| Left lingual gyrus                   | 0.092 | 0.003 | 0.127 | 0.408 | 286 |
| Left supramarginal gyrus             | 0.094 | 0.004 | 0.135 | 0.408 | 266 |
| Right middle temporal gyrus          | 0.101 | 0.005 | 0.100 | 0.369 | 277 |
| Left superior temporal gyrus         | 0.103 | 0.005 | 0.100 | 0.369 | 264 |
| Right pars triangularis              | 0.104 | 0.005 | 0.084 | 0.359 | 286 |

|                                      |       |       |       |       |     |
|--------------------------------------|-------|-------|-------|-------|-----|
| Left cuneus                          | 0.109 | 0.003 | 0.070 | 0.328 | 285 |
| Left banks superior temporal sulcus  | 0.110 | 0.005 | 0.087 | 0.359 | 253 |
| Left cortical thickness              | 0.116 | 0.003 | 0.053 | 0.304 | 289 |
| Left inferior parietal cortex        | 0.117 | 0.004 | 0.061 | 0.304 | 269 |
| Left postcentral gyrus               | 0.117 | 0.003 | 0.058 | 0.304 | 275 |
| Left lateral orbitofrontal cortex    | 0.120 | 0.005 | 0.045 | 0.292 | 288 |
| Right cortical thickness             | 0.120 | 0.003 | 0.046 | 0.292 | 289 |
| Right inferior parietal cortex       | 0.126 | 0.004 | 0.041 | 0.292 | 275 |
| Right cuneus                         | 0.126 | 0.004 | 0.037 | 0.292 | 286 |
| Right pars opercularis               | 0.134 | 0.005 | 0.027 | 0.271 | 283 |
| Left inferior temporal cortex gyrus  | 0.136 | 0.005 | 0.026 | 0.271 | 280 |
| Left middle temporal gyrus           | 0.143 | 0.005 | 0.020 | 0.271 | 272 |
| Right inferior temporal cortex gyrus | 0.150 | 0.005 | 0.014 | 0.247 | 278 |
| Right lateral occipital cortex       | 0.153 | 0.003 | 0.011 | 0.247 | 286 |
| Left fusiform gyrus                  | 0.156 | 0.004 | 0.009 | 0.247 | 286 |
| Left transverse temporal cortex      | 0.170 | 0.006 | 0.004 | 0.247 | 289 |

**TABLE S26b:** Full mega-analytic results for the association between illness duration and the surface area of each structure in pediatric OCD patients, controlling for age, sex, scan center and ICV. Correlation coefficient Pearsons r is reported.

|                                        | <b>Pearson's r (Dur)</b> | <b>Standard Error</b> | <b>P-value</b> | <b>FDR P-value</b> | <b>N patients</b> |
|----------------------------------------|--------------------------|-----------------------|----------------|--------------------|-------------------|
| Left superior temporal gyrus           | -0.130                   | 9.875                 | 0.038          | 0.940              | 264               |
| Left frontal pole                      | -0.107                   | 0.924                 | 0.075          | 0.940              | 287               |
| Right pars opercularis                 | -0.093                   | 5.241                 | 0.126          | 0.940              | 283               |
| Right transverse temporal cortex       | -0.087                   | 1.569                 | 0.149          | 0.940              | 288               |
| Left entorhinal cortex                 | -0.076                   | 1.845                 | 0.233          | 0.940              | 260               |
| Right superior frontal gyrus           | -0.068                   | 17.666                | 0.265          | 0.940              | 279               |
| Left temporal pole                     | -0.064                   | 1.662                 | 0.296          | 0.940              | 284               |
| Left transverse temporal cortex        | -0.064                   | 1.797                 | 0.290          | 0.940              | 289               |
| Left banks superior temporal sulcus    | -0.055                   | 4.220                 | 0.391          | 0.940              | 253               |
| Left lateral orbitofrontal cortex      | -0.053                   | 7.340                 | 0.381          | 0.940              | 288               |
| Left isthmus cingulate cortex          | -0.053                   | 4.037                 | 0.383          | 0.940              | 284               |
| Left superior parietal cortex          | -0.050                   | 14.614                | 0.413          | 0.940              | 285               |
| Left caudal middle frontal gyrus       | -0.049                   | 8.505                 | 0.418          | 0.940              | 288               |
| Right superior temporal gyrus          | -0.048                   | 8.972                 | 0.438          | 0.940              | 272               |
| Left rostral anterior cingulate cortex | -0.047                   | 3.818                 | 0.448          | 0.940              | 278               |
| Right banks superior temporal sulcus   | -0.047                   | 3.573                 | 0.453          | 0.940              | 267               |
| Left pars opercularis                  | -0.045                   | 6.367                 | 0.458          | 0.940              | 282               |
| Left insula                            | -0.043                   | 5.660                 | 0.484          | 0.940              | 280               |
| Left superior frontal gyrus            | -0.041                   | 15.736                | 0.507          | 0.940              | 280               |
| Right fusiform gyrus                   | -0.041                   | 8.618                 | 0.496          | 0.940              | 284               |
| Right isthmus cingulate cortex         | -0.039                   | 3.649                 | 0.516          | 0.940              | 284               |
| Right lingual gyrus                    | -0.037                   | 9.215                 | 0.541          | 0.940              | 288               |
| Right rostral middle frontal gyrus     | -0.034                   | 16.143                | 0.573          | 0.940              | 286               |
| Right medial orbitofrontal cortex      | -0.029                   | 4.840                 | 0.632          | 0.940              | 283               |
| Right pars orbitalis                   | -0.028                   | 2.418                 | 0.645          | 0.940              | 286               |

|                                        |        |         |       |       |     |
|----------------------------------------|--------|---------|-------|-------|-----|
| Right inferior parietal cortex         | -0.028 | 15.723  | 0.645 | 0.940 | 275 |
| Left parahippocampal gyrus             | -0.027 | 2.500   | 0.660 | 0.940 | 285 |
| Left postcentral gyrus                 | -0.027 | 10.210  | 0.660 | 0.940 | 275 |
| Right caudal middle frontal gyrus      | -0.026 | 8.597   | 0.675 | 0.940 | 284 |
| Right postcentral gyrus                | -0.026 | 10.494  | 0.674 | 0.940 | 278 |
| Left surface area                      | -0.026 | 128.528 | 0.666 | 1.000 | 289 |
| Left pars triangularis                 | -0.026 | 4.628   | 0.663 | 0.940 | 285 |
| Right parahippocampal gyrus            | -0.024 | 2.586   | 0.694 | 0.940 | 285 |
| Left pars orbitalis                    | -0.022 | 1.984   | 0.710 | 0.940 | 288 |
| Right surface area                     | -0.020 | 132.438 | 0.746 | 1.000 | 289 |
| Right cuneus                           | -0.018 | 5.040   | 0.770 | 0.940 | 286 |
| Right temporal pole                    | -0.017 | 1.523   | 0.782 | 0.940 | 285 |
| Left precuneus                         | -0.017 | 10.230  | 0.774 | 0.940 | 285 |
| Left middle temporal gyrus             | -0.011 | 7.922   | 0.858 | 0.940 | 272 |
| Right frontal pole                     | -0.010 | 1.099   | 0.862 | 0.940 | 289 |
| Right supramarginal gyrus              | -0.008 | 12.389  | 0.891 | 0.940 | 274 |
| Right caudal anterior cingulate cortex | 0.004  | 3.449   | 0.947 | 0.947 | 284 |
| Left lingual gyrus                     | 0.006  | 9.492   | 0.919 | 0.940 | 286 |
| Left supramarginal gyrus               | 0.006  | 13.202  | 0.927 | 0.940 | 266 |
| Right pericalcarine gyrus              | 0.008  | 5.699   | 0.899 | 0.940 | 287 |
| Right entorhinal cortex                | 0.009  | 2.056   | 0.895 | 0.940 | 241 |
| Right lateral orbitofrontal cortex     | 0.011  | 7.188   | 0.854 | 0.940 | 289 |
| Right pars triangularis                | 0.012  | 5.559   | 0.847 | 0.940 | 286 |
| Left lateral occipital cortex          | 0.014  | 12.495  | 0.817 | 0.940 | 286 |
| Left rostral middle frontal gyrus      | 0.014  | 15.213  | 0.820 | 0.940 | 288 |
| Right precuneus                        | 0.020  | 10.827  | 0.745 | 0.940 | 282 |
| Left fusiform gyrus                    | 0.021  | 9.280   | 0.729 | 0.940 | 286 |
| Right paracentral lobule               | 0.021  | 5.451   | 0.731 | 0.940 | 286 |
| Right lateral occipital cortex         | 0.024  | 13.117  | 0.695 | 0.940 | 286 |

|                                         |       |        |       |       |     |
|-----------------------------------------|-------|--------|-------|-------|-----|
| Right insula                            | 0.026 | 5.532  | 0.668 | 0.940 | 276 |
| Left medial orbitofrontal cortex        | 0.029 | 5.563  | 0.630 | 0.940 | 284 |
| Right precentral gyrus                  | 0.029 | 10.536 | 0.637 | 0.940 | 280 |
| Right superior parietal cortex          | 0.032 | 14.140 | 0.595 | 0.940 | 284 |
| Right inferior temporal cortex gyrus    | 0.042 | 10.170 | 0.491 | 0.940 | 278 |
| Left inferior parietal cortex           | 0.048 | 13.568 | 0.439 | 0.940 | 269 |
| Right posterior cingulate cortex        | 0.048 | 3.956  | 0.427 | 0.940 | 285 |
| Right middle temporal gyrus             | 0.053 | 9.015  | 0.392 | 0.940 | 277 |
| Left cuneus                             | 0.055 | 4.779  | 0.361 | 0.940 | 285 |
| Left paracentral lobule                 | 0.057 | 4.467  | 0.343 | 0.940 | 286 |
| Left pericalcarine gyrus                | 0.071 | 5.554  | 0.239 | 0.940 | 285 |
| Left inferior temporal cortex gyrus     | 0.074 | 10.281 | 0.228 | 0.940 | 280 |
| Left posterior cingulate cortex         | 0.077 | 4.230  | 0.201 | 0.940 | 288 |
| Left precentral gyrus                   | 0.084 | 10.663 | 0.167 | 0.940 | 281 |
| Left caudal anterior cingulate cortex   | 0.094 | 3.475  | 0.122 | 0.940 | 282 |
| Right rostral anterior cingulate cortex | 0.110 | 3.408  | 0.072 | 0.940 | 281 |



**TABLE S27a:** Full mega-analytic results for the association between illness severity and the cortical thickness of each structure in adult OCD patients based on the YBOCS, controlling for age, sex and scan center. Correlation coefficient Pearsons r is reported.

|                                      | <b>Pearson's r<br/>(YBOCS)</b> | <b>Standard Error</b> | <b>P-value</b> | <b>FDR P-value</b> | <b>N patients</b> |
|--------------------------------------|--------------------------------|-----------------------|----------------|--------------------|-------------------|
| Right pericalcarine gyrus            | -0.061                         | 0.001                 | 0.023          | 0.899              | 1433              |
| Right parahippocampal gyrus          | -0.059                         | 0.001                 | 0.027          | 0.899              | 1443              |
| Left postcentral gyrus               | -0.053                         | <0.001                | 0.047          | 0.899              | 1421              |
| Left pericalcarine gyrus             | -0.043                         | 0.001                 | 0.106          | 0.899              | 1437              |
| Right transverse temporal cortex     | -0.042                         | 0.001                 | 0.117          | 0.899              | 1451              |
| Left parahippocampal gyrus           | -0.039                         | 0.001                 | 0.137          | 0.899              | 1446              |
| Right postcentral gyrus              | -0.037                         | 0.001                 | 0.166          | 0.899              | 1429              |
| Left frontal pole                    | -0.034                         | 0.001                 | 0.200          | 0.899              | 1445              |
| Left lingual gyrus                   | -0.031                         | 0.001                 | 0.238          | 0.899              | 1445              |
| Left supramarginal gyrus             | -0.029                         | 0.001                 | 0.304          | 0.899              | 1326              |
| Left caudal middle frontal gyrus     | -0.029                         | 0.001                 | 0.273          | 0.899              | 1433              |
| Left inferior parietal cortex        | -0.028                         | 0.001                 | 0.304          | 0.899              | 1392              |
| Left cuneus                          | -0.028                         | 0.001                 | 0.299          | 0.899              | 1420              |
| Right frontal pole                   | -0.026                         | 0.001                 | 0.323          | 0.899              | 1450              |
| Right banks superior temporal sulcus | -0.026                         | 0.001                 | 0.338          | 0.899              | 1351              |
| Right precuneus                      | -0.025                         | 0.001                 | 0.354          | 0.899              | 1446              |
| Left transverse temporal cortex      | -0.025                         | 0.001                 | 0.348          | 0.899              | 1448              |
| Left paracentral lobule              | -0.024                         | 0.001                 | 0.359          | 0.899              | 1445              |
| Left middle temporal gyrus           | -0.023                         | 0.001                 | 0.414          | 0.939              | 1330              |
| Left insula                          | -0.023                         | 0.001                 | 0.384          | 0.928              | 1427              |
| Right cuneus                         | -0.019                         | 0.001                 | 0.476          | 0.939              | 1419              |
| Right lateral occipital cortex       | -0.017                         | 0.001                 | 0.519          | 0.939              | 1434              |
| Left cortical thickness              | -0.014                         | <0.001                | 0.610          | 0.939              | 1453              |
| Left superior temporal gyrus         | -0.013                         | 0.001                 | 0.633          | 0.939              | 1295              |
| Left precuneus                       | -0.011                         | 0.001                 | 0.683          | 0.939              | 1448              |

|                                       |        |        |       |       |      |
|---------------------------------------|--------|--------|-------|-------|------|
| Left posterior cingulate cortex       | -0.010 | 0.001  | 0.701 | 0.939 | 1448 |
| Right pars triangularis               | -0.009 | 0.001  | 0.730 | 0.939 | 1420 |
| Right insula                          | -0.009 | 0.001  | 0.724 | 0.939 | 1418 |
| Right paracentral lobule              | -0.009 | 0.001  | 0.721 | 0.939 | 1449 |
| Left medial orbitofrontal cortex      | -0.008 | 0.001  | 0.771 | 0.939 | 1445 |
| Right superior temporal gyrus         | -0.008 | 0.001  | 0.763 | 0.939 | 1338 |
| Left lateral occipital cortex         | -0.007 | 0.001  | 0.787 | 0.939 | 1435 |
| Left rostral middle frontal gyrus     | -0.006 | 0.001  | 0.831 | 0.939 | 1440 |
| Right supramarginal gyrus             | -0.006 | 0.001  | 0.819 | 0.939 | 1350 |
| Right precentral gyrus                | -0.005 | 0.001  | 0.859 | 0.939 | 1412 |
| Left pars triangularis                | -0.005 | 0.001  | 0.855 | 0.939 | 1446 |
| Left entorhinal cortex                | -0.004 | 0.002  | 0.890 | 0.952 | 1340 |
| Right lingual gyrus                   | -0.003 | 0.001  | 0.924 | 0.952 | 1447 |
| Left pars opercularis                 | -0.002 | 0.001  | 0.925 | 0.952 | 1445 |
| Right cortical thickness              | 0.001  | <0.001 | 0.978 | 0.978 | 1448 |
| Left superior frontal gyrus           | 0.002  | 0.001  | 0.943 | 0.957 | 1398 |
| Left precentral gyrus                 | 0.003  | 0.001  | 0.912 | 0.952 | 1427 |
| Right fusiform gyrus                  | 0.005  | 0.001  | 0.839 | 0.939 | 1419 |
| Left superior parietal cortex         | 0.005  | <0.001 | 0.854 | 0.939 | 1424 |
| Right superior parietal cortex        | 0.006  | 0.001  | 0.814 | 0.939 | 1424 |
| Left isthmus cingulate cortex         | 0.007  | 0.001  | 0.787 | 0.939 | 1447 |
| Right inferior parietal cortex        | 0.008  | 0.001  | 0.758 | 0.939 | 1410 |
| Right pars opercularis                | 0.008  | 0.001  | 0.777 | 0.939 | 1434 |
| Left pars orbitalis                   | 0.009  | 0.001  | 0.725 | 0.939 | 1444 |
| Right posterior cingulate cortex      | 0.009  | 0.001  | 0.729 | 0.939 | 1449 |
| Right superior frontal gyrus          | 0.010  | 0.001  | 0.701 | 0.939 | 1437 |
| Right rostral middle frontal gyrus    | 0.011  | 0.001  | 0.692 | 0.939 | 1448 |
| Left caudal anterior cingulate cortex | 0.012  | 0.001  | 0.651 | 0.939 | 1430 |
| Left temporal pole                    | 0.013  | 0.001  | 0.632 | 0.939 | 1448 |

|                                         |       |       |       |       |      |
|-----------------------------------------|-------|-------|-------|-------|------|
| Right isthmus cingulate cortex          | 0.016 | 0.001 | 0.552 | 0.939 | 1451 |
| Right middle temporal gyrus             | 0.017 | 0.001 | 0.519 | 0.939 | 1425 |
| Left fusiform gyrus                     | 0.018 | 0.001 | 0.491 | 0.939 | 1443 |
| Right rostral anterior cingulate cortex | 0.019 | 0.001 | 0.473 | 0.939 | 1431 |
| Left inferior temporal cortex gyrus     | 0.019 | 0.001 | 0.478 | 0.939 | 1425 |
| Right temporal pole                     | 0.020 | 0.002 | 0.450 | 0.939 | 1421 |
| Right medial orbitofrontal cortex       | 0.027 | 0.001 | 0.318 | 0.899 | 1442 |
| Right caudal anterior cingulate cortex  | 0.028 | 0.001 | 0.290 | 0.899 | 1441 |
| Left banks superior temporal sulcus     | 0.028 | 0.001 | 0.316 | 0.899 | 1323 |
| Left lateral orbitofrontal cortex       | 0.030 | 0.001 | 0.251 | 0.899 | 1449 |
| Right caudal middle frontal gyrus       | 0.031 | 0.001 | 0.244 | 0.899 | 1440 |
| Right inferior temporal cortex gyrus    | 0.031 | 0.001 | 0.246 | 0.899 | 1443 |
| Right pars orbitalis                    | 0.032 | 0.001 | 0.233 | 0.899 | 1450 |
| Right lateral orbitofrontal cortex      | 0.037 | 0.001 | 0.167 | 0.899 | 1452 |
| Right entorhinal cortex                 | 0.044 | 0.002 | 0.116 | 0.899 | 1297 |
| Left rostral anterior cingulate cortex  | 0.049 | 0.001 | 0.069 | 0.899 | 1429 |

**TABLE S27b:** Full mega-analytic results for the association between illness severity and the surface area of each structure in adult OCD patients based on the YBOCS, controlling for age, sex, scan center and ICV. Correlation coefficient Pearsons r is reported.

|                                                | <b>Pearson's r<br/>(YBOCS)</b> | <b>Standard Error</b> | <b>P-value</b> | <b>FDR P-value</b> | <b>N patients</b> |
|------------------------------------------------|--------------------------------|-----------------------|----------------|--------------------|-------------------|
| <b>Left pars orbitalis</b>                     | -0.093                         | 0.297                 | 0.001          | 0.096              | 1443              |
| <b>Left paracentral lobule</b>                 | -0.079                         | 0.665                 | 0.005          | 0.114              | 1444              |
| <b>Right rostral anterior cingulate cortex</b> | -0.075                         | 0.494                 | 0.005          | 0.114              | 1431              |
| <b>Right lateral orbitofrontal cortex</b>      | -0.070                         | 1.032                 | 0.010          | 0.173              | 1451              |
| <b>Left lateral orbitofrontal cortex</b>       | -0.068                         | 0.951                 | 0.016          | 0.198              | 1448              |
| <b>Left posterior cingulate cortex</b>         | -0.063                         | 0.616                 | 0.022          | 0.198              | 1447              |
| <b>Right caudal middle frontal gyrus</b>       | -0.062                         | 1.346                 | 0.021          | 0.198              | 1439              |
| <b>Left rostral anterior cingulate cortex</b>  | -0.060                         | 0.539                 | 0.023          | 0.198              | 1428              |
| <b>Right inferior parietal cortex</b>          | -0.060                         | 2.455                 | 0.029          | 0.204              | 1409              |
| <b>Left middle temporal gyrus</b>              | -0.058                         | 1.390                 | 0.033          | 0.204              | 1329              |
| <b>Left superiortempora gyrus</b>              | -0.058                         | 1.508                 | 0.032          | 0.204              | 1294              |
| <b>Right surface area</b>                      | -0.057                         | 20.062                | 0.034          | 1.000              | 1450              |
| <b>Right caudal anterior cingulate cortex</b>  | -0.057                         | 0.571                 | 0.042          | 0.221              | 1440              |
| <b>Right paracentral lobule</b>                | -0.054                         | 0.793                 | 0.058          | 0.221              | 1448              |
| <b>Right posterior cingulate cortex</b>        | -0.054                         | 0.663                 | 0.050          | 0.221              | 1448              |
| <b>Right medial orbitofrontal cortex</b>       | -0.053                         | 0.700                 | 0.050          | 0.221              | 1442              |
| <b>Left precentral gyrus</b>                   | -0.052                         | 1.715                 | 0.056          | 0.221              | 1426              |
| <b>Left surface area</b>                       | -0.052                         | 20.003                | 0.054          | 1.000              | 1452              |
| <b>Left superior frontal gyrus</b>             | -0.049                         | 2.500                 | 0.077          | 0.276              | 1397              |
| <b>Left rostral middle frontal gyrus</b>       | -0.047                         | 2.315                 | 0.054          | 0.221              | 1439              |
| <b>Left banks superior temporal sulcus</b>     | -0.047                         | 0.653                 | 0.084          | 0.286              | 1322              |
| <b>Right rostral middle frontal gyrus</b>      | -0.046                         | 2.331                 | 0.056          | 0.221              | 1447              |
| <b>Right isthmus cingulate cortex</b>          | -0.045                         | 0.564                 | 0.106          | 0.344              | 1450              |
| <b>Right superior frontal gyrus</b>            | -0.042                         | 2.479                 | 0.117          | 0.361              | 1436              |
| <b>Left lateral occipital cortex</b>           | -0.041                         | 1.879                 | 0.144          | 0.391              | 1434              |

|                                       |        |       |       |       |      |
|---------------------------------------|--------|-------|-------|-------|------|
| Left medial orbitofrontal cortex      | -0.040 | 0.825 | 0.122 | 0.362 | 1444 |
| Right pars opercularis                | -0.039 | 0.872 | 0.132 | 0.374 | 1434 |
| Right insula                          | -0.036 | 0.899 | 0.163 | 0.428 | 1417 |
| Right superior temporal gyrus         | -0.036 | 1.302 | 0.178 | 0.447 | 1337 |
| Left temporal pole                    | -0.034 | 0.236 | 0.234 | 0.549 | 1447 |
| Left caudal middle frontal gyrus      | -0.033 | 1.347 | 0.202 | 0.491 | 1432 |
| Left isthmus cingulate cortex         | -0.033 | 0.627 | 0.266 | 0.567 | 1446 |
| Right cuneus                          | -0.032 | 0.761 | 0.267 | 0.567 | 1418 |
| Right pars orbitalis                  | -0.028 | 0.369 | 0.278 | 0.572 | 1449 |
| Right middle temporal gyrus           | -0.028 | 1.363 | 0.263 | 0.567 | 1425 |
| Right superior parietal cortex        | -0.027 | 2.101 | 0.302 | 0.604 | 1423 |
| Left caudal anterior cingulate cortex | -0.027 | 0.514 | 0.318 | 0.619 | 1429 |
| Left frontal pole                     | -0.027 | 0.137 | 0.364 | 0.652 | 1444 |
| Right frontal pole                    | -0.025 | 0.176 | 0.350 | 0.644 | 1449 |
| Right precentral gyrus                | -0.024 | 1.855 | 0.445 | 0.703 | 1411 |
| Right entorhinal cortex               | -0.024 | 0.361 | 0.380 | 0.663 | 1296 |
| Right banks superior temporal sulcus  | -0.022 | 0.538 | 0.338 | 0.639 | 1350 |
| Right inferior temporal cortex gyrus  | -0.020 | 1.585 | 0.437 | 0.703 | 1442 |
| Right precuneus                       | -0.020 | 1.590 | 0.546 | 0.814 | 1445 |
| Left transverse temporal gyrus        | -0.019 | 0.292 | 0.507 | 0.783 | 1447 |
| Left inferior parietal cortex         | -0.018 | 2.215 | 0.551 | 0.814 | 1391 |
| Left insula                           | -0.016 | 0.826 | 0.588 | 0.815 | 1426 |
| Left precuneus                        | -0.015 | 1.473 | 0.677 | 0.823 | 1447 |
| Right transverse temporal gyrus       | -0.013 | 0.217 | 0.663 | 0.819 | 1450 |
| Left superior parietal cortex         | -0.013 | 2.159 | 0.646 | 0.819 | 1423 |
| Right postcentral gyrus               | -0.011 | 1.548 | 0.760 | 0.890 | 1428 |
| Left inferior temporal cortex gyrus   | -0.011 | 1.631 | 0.646 | 0.819 | 1424 |
| Right fusiform gyrus                  | -0.010 | 1.391 | 0.724 | 0.864 | 1418 |
| Right pars triangularis               | -0.009 | 0.910 | 0.655 | 0.819 | 1419 |

|                                |        |       |       |       |      |
|--------------------------------|--------|-------|-------|-------|------|
| Right lateral occipital cortex | -0.007 | 1.971 | 0.844 | 0.921 | 1433 |
| Right pericalcarine gyrus      | -0.005 | 0.929 | 0.853 | 0.921 | 1432 |
| Left supramarginal gyrus       | -0.004 | 1.950 | 0.896 | 0.952 | 1325 |
| Left pars opercularis          | -0.001 | 0.992 | 0.936 | 0.979 | 1444 |
| Left entorhinal cortex         | -0.001 | 0.315 | 0.954 | 0.983 | 1340 |
| Left pars triangularis         | 0.000  | 0.726 | 0.993 | 0.994 | 1445 |
| Left lingual gyrus             | 0.003  | 1.516 | 0.994 | 0.994 | 1444 |
| Left postcentral gyrus         | 0.004  | 1.624 | 0.785 | 0.905 | 1420 |
| Left parahippocampal gyrus     | 0.004  | 0.405 | 0.848 | 0.921 | 1445 |
| Right temporal pole            | 0.007  | 0.237 | 0.799 | 0.906 | 1420 |
| Left fusiform gyrus            | 0.012  | 1.461 | 0.663 | 0.819 | 1442 |
| Right lingual gyrus            | 0.013  | 1.492 | 0.648 | 0.819 | 1446 |
| Left cuneus                    | 0.014  | 0.771 | 0.577 | 0.815 | 1419 |
| Right supramarginal gyrus      | 0.017  | 1.851 | 0.571 | 0.815 | 1349 |
| Right parahippocampal gyrus    | 0.021  | 0.376 | 0.417 | 0.691 | 1442 |
| Left pericalcarine gyrus       | 0.025  | 0.857 | 0.392 | 0.666 | 1436 |

**TABLE S28a:** Full mega-analytic results for the association between illness severity and the cortical thickness of each structure in pediatric OCD patients based on the CYBOCS, controlling for age, sex and scan center. Correlation coefficient Pearsons r is reported.

|                                         | <b>Pearson's r<br/>(CYBOCS)</b> | <b>Standard Error</b> | <b>P-value</b> | <b>FDR P-value</b> | <b>N patients</b> |
|-----------------------------------------|---------------------------------|-----------------------|----------------|--------------------|-------------------|
| Right caudal anterior cingulate cortex  | -0.126                          | 0.002                 | 0.013          | 0.551              | 398               |
| Right rostral anterior cingulate cortex | -0.123                          | 0.002                 | 0.016          | 0.551              | 395               |
| Right isthmus cingulate cortex          | -0.087                          | 0.002                 | 0.087          | 0.974              | 396               |
| Right rostral middle frontal gyrus      | -0.084                          | 0.001                 | 0.099          | 0.974              | 401               |
| Right frontal pole                      | -0.083                          | 0.003                 | 0.102          | 0.974              | 403               |
| Right paracentral lobule                | -0.080                          | 0.001                 | 0.116          | 0.974              | 400               |
| Left banks superior temporal sulcus     | -0.063                          | 0.002                 | 0.236          | 0.974              | 367               |
| Left posterior cingulate cortex         | -0.062                          | 0.001                 | 0.227          | 0.974              | 398               |
| Right pars orbitalis                    | -0.062                          | 0.002                 | 0.220          | 0.974              | 401               |
| Right pars triangularis                 | -0.055                          | 0.001                 | 0.281          | 0.974              | 399               |
| Right parahippocampal gyrus             | -0.052                          | 0.002                 | 0.316          | 0.974              | 391               |
| Left lateral occipital cortex           | -0.050                          | 0.001                 | 0.325          | 0.974              | 399               |
| Left paracentral lobule                 | -0.047                          | 0.001                 | 0.360          | 0.974              | 400               |
| Left entorhinal cortex                  | -0.047                          | 0.003                 | 0.375          | 0.974              | 367               |
| Right cuneus                            | -0.046                          | 0.001                 | 0.373          | 0.974              | 398               |
| Right medial orbitofrontal cortex       | -0.044                          | 0.002                 | 0.392          | 0.974              | 394               |
| Left superior temporal gyrus            | -0.043                          | 0.001                 | 0.413          | 0.974              | 378               |
| Left fusiform gyrus                     | -0.043                          | 0.001                 | 0.401          | 0.974              | 396               |
| Right superior temporal gyrus           | -0.042                          | 0.001                 | 0.417          | 0.974              | 385               |
| Left cuneus                             | -0.041                          | 0.001                 | 0.417          | 0.974              | 400               |
| Right lateral occipital cortex          | -0.036                          | 0.001                 | 0.486          | 0.998              | 398               |
| Left inferior parietal cortex           | -0.033                          | 0.001                 | 0.533          | 0.998              | 382               |
| Right pars opercularis                  | -0.032                          | 0.001                 | 0.534          | 0.998              | 397               |
| Left parahippocampal gyrus              | -0.032                          | 0.002                 | 0.531          | 0.998              | 392               |
| Right lateral orbitofrontal cortex      | -0.029                          | 0.001                 | 0.572          | 0.998              | 402               |

|                                        |        |       |       |       |     |
|----------------------------------------|--------|-------|-------|-------|-----|
| Left precuneus                         | -0.024 | 0.001 | 0.634 | 0.998 | 400 |
| Left postcentral gyrus                 | -0.023 | 0.001 | 0.658 | 0.998 | 388 |
| Right transverse temporal cortex       | -0.023 | 0.002 | 0.647 | 0.998 | 403 |
| Left pars opercularis                  | -0.021 | 0.001 | 0.689 | 0.998 | 396 |
| Left medial orbitofrontal cortex       | -0.021 | 0.002 | 0.679 | 0.998 | 397 |
| Left caudal anterior cingulate cortex  | -0.020 | 0.002 | 0.691 | 0.998 | 393 |
| Right insula                           | -0.017 | 0.001 | 0.747 | 0.998 | 386 |
| Left temporal pole                     | -0.017 | 0.003 | 0.737 | 0.998 | 396 |
| Left cortical thickness                | -0.017 | 0.001 | 0.734 | 0.998 | 404 |
| Left superior parietal cortex          | -0.016 | 0.001 | 0.761 | 0.998 | 399 |
| Right cortical thickness               | -0.016 | 0.001 | 0.747 | 0.998 | 404 |
| Left pars triangularis                 | -0.015 | 0.001 | 0.771 | 0.998 | 400 |
| Right inferior parietal cortex         | -0.015 | 0.001 | 0.773 | 0.998 | 389 |
| Left supramarginal gyrus               | -0.015 | 0.001 | 0.774 | 0.998 | 380 |
| Right middle temporal gyrus            | -0.015 | 0.001 | 0.768 | 0.998 | 388 |
| Right superior parietal cortex         | -0.013 | 0.001 | 0.800 | 0.998 | 398 |
| Left rostral middle frontal gyrus      | -0.008 | 0.001 | 0.878 | 0.998 | 403 |
| Left pars orbitalis                    | -0.007 | 0.002 | 0.893 | 0.998 | 400 |
| Right posterior cingulate cortex       | -0.007 | 0.001 | 0.888 | 0.998 | 397 |
| Right superior frontal gyrus           | -0.007 | 0.001 | 0.886 | 0.998 | 393 |
| Right postcentral gyrus                | -0.006 | 0.001 | 0.913 | 0.998 | 390 |
| Left frontal pole                      | -0.003 | 0.003 | 0.949 | 0.998 | 402 |
| Left rostral anterior cingulate cortex | 0.001  | 0.002 | 0.991 | 0.998 | 392 |
| Left middle temporal gyrus             | <0.001 | 0.001 | 0.998 | 0.998 | 386 |
| Left transverse temporal cortex        | 0.002  | 0.002 | 0.970 | 0.998 | 401 |
| Right precuneus                        | 0.002  | 0.001 | 0.973 | 0.998 | 397 |
| Left inferior temporal cortex gyrus    | 0.002  | 0.001 | 0.976 | 0.998 | 395 |
| Left lingual gyrus                     | 0.003  | 0.001 | 0.951 | 0.998 | 400 |
| Left superior frontal gyrus            | 0.003  | 0.001 | 0.953 | 0.998 | 394 |



|                                      |       |       |       |       |     |
|--------------------------------------|-------|-------|-------|-------|-----|
| Left insula                          | 0.003 | 0.001 | 0.954 | 0.998 | 386 |
| Left pericalcarine gyrus             | 0.008 | 0.001 | 0.883 | 0.998 | 399 |
| Left isthmus cingulate cortex        | 0.015 | 0.002 | 0.771 | 0.998 | 396 |
| Right lingual gyrus                  | 0.018 | 0.001 | 0.724 | 0.998 | 403 |
| Right fusiform gyrus                 | 0.030 | 0.001 | 0.561 | 0.998 | 395 |
| Right supramarginal gyrus            | 0.041 | 0.001 | 0.435 | 0.983 | 384 |
| Left lateral orbitofrontal cortex    | 0.044 | 0.002 | 0.386 | 0.974 | 403 |
| Right inferior temporal cortex gyrus | 0.045 | 0.001 | 0.382 | 0.974 | 392 |
| Right entorhinal cortex              | 0.047 | 0.003 | 0.389 | 0.974 | 346 |
| Right caudal middle frontal gyrus    | 0.051 | 0.001 | 0.323 | 0.974 | 396 |
| Right banks superior temporal sulcus | 0.055 | 0.002 | 0.297 | 0.974 | 381 |
| Right precentral gyrus               | 0.060 | 0.001 | 0.247 | 0.974 | 392 |
| Left caudal middle frontal gyrus     | 0.064 | 0.001 | 0.205 | 0.974 | 402 |
| Left precentral gyrus                | 0.066 | 0.001 | 0.196 | 0.974 | 394 |
| Right temporal pole                  | 0.073 | 0.003 | 0.156 | 0.974 | 395 |
| Right pericalcarine gyrus            | 0.077 | 0.001 | 0.133 | 0.974 | 398 |

**TABLE S28b:** Full mega-analytic results for the association between illness severity and the surface area of each structure in pediatric OCD patients based on the CYBOCS, controlling for age, sex, scan center and ICV. Correlation coefficient Pearsons r is reported.

|                                        | <b>Pearson's r<br/>(CYBOCS)</b> | <b>Standard Error</b> | <b>P-value</b> | <b>FDR P-value</b> | <b>N patients</b> |
|----------------------------------------|---------------------------------|-----------------------|----------------|--------------------|-------------------|
| Right lateral orbitofrontal cortex     | -0.166                          | 2.170                 | 0.001          | 0.072              | 401               |
| Right supramarginal gyrus              | -0.118                          | 3.555                 | 0.023          | 0.428              | 383               |
| Left caudal anterior cingulate cortex  | -0.118                          | 1.000                 | 0.021          | 0.428              | 392               |
| Right middle temporal gyrus            | -0.116                          | 2.743                 | 0.025          | 0.428              | 387               |
| Left lateral orbitofrontal cortex      | -0.105                          | 2.243                 | 0.039          | 0.492              | 402               |
| Left pars orbitalis                    | -0.100                          | 0.594                 | 0.051          | 0.492              | 399               |
| Right transverse temporal cortex       | -0.096                          | 0.458                 | 0.060          | 0.506              | 402               |
| Left lateral occipital cortex          | -0.089                          | 3.818                 | 0.081          | 0.526              | 398               |
| Right postcentral gyrus                | -0.088                          | 3.141                 | 0.088          | 0.526              | 389               |
| Left posterior cingulate cortex        | -0.086                          | 1.264                 | 0.092          | 0.526              | 397               |
| Right superior temporal gyrus          | -0.085                          | 2.540                 | 0.104          | 0.526              | 384               |
| Left transverse temporal cortex        | -0.084                          | 0.509                 | 0.100          | 0.526              | 400               |
| Left superior frontal gyrus            | -0.081                          | 4.732                 | 0.116          | 0.526              | 393               |
| Right rostral middle frontal gyrus     | -0.080                          | 4.973                 | 0.115          | 0.526              | 400               |
| Right precentral gyrus                 | -0.076                          | 3.100                 | 0.141          | 0.565              | 391               |
| Left precentral gyrus                  | -0.071                          | 3.118                 | 0.170          | 0.579              | 393               |
| Left rostral anterior cingulate cortex | -0.070                          | 1.140                 | 0.174          | 0.579              | 391               |
| Left rostral middle frontal gyrus      | -0.069                          | 4.646                 | 0.178          | 0.579              | 402               |
| Right surface area                     | -0.068                          | 40.455                | 0.184          | 1.000              | 403               |
| Right superior frontal gyrus           | -0.067                          | 5.282                 | 0.194          | 0.579              | 392               |
| Left insula                            | -0.067                          | 1.617                 | 0.197          | 0.579              | 385               |
| Right lateral occipital cortex         | -0.067                          | 3.878                 | 0.188          | 0.579              | 397               |
| Right medial orbitofrontal cortex      | -0.064                          | 1.464                 | 0.213          | 0.579              | 393               |
| Right cuneus                           | -0.064                          | 1.552                 | 0.210          | 0.579              | 397               |
| Left superior temporal gyrus           | -0.061                          | 2.855                 | 0.247          | 0.646              | 377               |

|                                      |        |        |       |       |     |
|--------------------------------------|--------|--------|-------|-------|-----|
| Right pars opercularis               | -0.057 | 1.597  | 0.270 | 0.677 | 396 |
| Right caudal middle frontal gyrus    | -0.056 | 2.586  | 0.279 | 0.677 | 395 |
| Left medial orbitofrontal cortex     | -0.050 | 1.731  | 0.333 | 0.781 | 396 |
| Right temporal pole                  | -0.047 | 0.459  | 0.362 | 0.820 | 394 |
| Left surface area                    | -0.043 | 39.773 | 0.398 | 1.000 | 403 |
| Left middle temporal gyrus           | -0.041 | 2.629  | 0.432 | 0.886 | 385 |
| Right insula                         | -0.040 | 1.729  | 0.439 | 0.886 | 385 |
| Left banks superior temporal sulcus  | -0.038 | 1.339  | 0.477 | 0.886 | 366 |
| Left entorhinal cortex               | -0.038 | 0.620  | 0.475 | 0.886 | 366 |
| Left isthmus cingulate cortex        | -0.036 | 1.194  | 0.483 | 0.886 | 396 |
| Right lingual gyrus                  | -0.032 | 2.924  | 0.530 | 0.924 | 402 |
| Left caudal middle frontal gyrus     | -0.027 | 2.587  | 0.590 | 0.969 | 401 |
| Left lingual gyrus                   | -0.026 | 3.016  | 0.617 | 0.969 | 399 |
| Right fusiform gyrus                 | -0.025 | 2.630  | 0.625 | 0.969 | 394 |
| Left postcentral gyrus               | -0.018 | 3.156  | 0.725 | 0.969 | 387 |
| Right paracentral lobule             | -0.017 | 1.568  | 0.735 | 0.969 | 399 |
| Left frontal pole                    | -0.015 | 0.287  | 0.775 | 0.969 | 401 |
| Left parahippocampal gyrus           | -0.014 | 0.778  | 0.786 | 0.969 | 391 |
| Right pars orbitalis                 | -0.013 | 0.736  | 0.801 | 0.969 | 400 |
| Right pars triangularis              | -0.011 | 1.675  | 0.831 | 0.974 | 398 |
| Left paracentral lobule              | -0.006 | 1.271  | 0.907 | 0.991 | 399 |
| Right pericalcarine gyrus            | -0.006 | 1.727  | 0.901 | 0.991 | 397 |
| Right isthmus cingulate cortex       | -0.004 | 1.069  | 0.932 | 0.991 | 395 |
| Right banks superior temporal sulcus | -0.002 | 1.049  | 0.971 | 0.991 | 380 |
| Left supramarginal gyrus             | 0.001  | 3.949  | 0.983 | 0.991 | 379 |
| Right inferior temporal cortex gyrus | 0.001  | 3.110  | 0.991 | 0.991 | 391 |
| Left superior parietal cortex        | 0.003  | 4.459  | 0.947 | 0.991 | 398 |
| Left precuneus                       | 0.003  | 3.091  | 0.948 | 0.991 | 399 |
| Left pericalcarine gyrus             | 0.003  | 1.704  | 0.955 | 0.991 | 398 |

|                                         |       |       |       |       |     |
|-----------------------------------------|-------|-------|-------|-------|-----|
| Left inferior temporal cortex gyrus     | 0.003 | 3.185 | 0.960 | 0.991 | 394 |
| Right superior parietal cortex          | 0.012 | 4.375 | 0.812 | 0.969 | 397 |
| Left inferior parietal cortex           | 0.013 | 4.139 | 0.800 | 0.969 | 381 |
| Right rostral anterior cingulate cortex | 0.013 | 0.979 | 0.801 | 0.969 | 394 |
| Right precuneus                         | 0.015 | 3.215 | 0.774 | 0.969 | 396 |
| Left temporal pole                      | 0.019 | 0.496 | 0.712 | 0.969 | 395 |
| Left cuneus                             | 0.020 | 1.469 | 0.694 | 0.969 | 399 |
| Right posterior cingulate cortex        | 0.020 | 1.226 | 0.704 | 0.969 | 396 |
| Left fusiform gyrus                     | 0.021 | 2.794 | 0.688 | 0.969 | 395 |
| Right frontal pole                      | 0.024 | 0.318 | 0.641 | 0.969 | 402 |
| Right parahippocampal gyrus             | 0.030 | 0.805 | 0.562 | 0.955 | 390 |
| Right caudal anterior cingulate cortex  | 0.035 | 1.032 | 0.495 | 0.886 | 397 |
| Right inferior parietal cortex          | 0.037 | 4.841 | 0.474 | 0.886 | 388 |
| Left pars opercularis                   | 0.038 | 1.924 | 0.461 | 0.886 | 395 |
| Left pars triangularis                  | 0.076 | 1.411 | 0.135 | 0.565 | 399 |
| Right entorhinal cortex                 | 0.109 | 0.603 | 0.047 | 0.492 | 345 |

**TABLE S29a:** Overview of the effect sizes of the significant results ( $q < 0.05$ ) detected by the adult meta-analysis on cortical thickness controlled for age, sex and scan center.

|                                       | Med vs HC                    |                    | Med vs Unmedicated OCD       |                    |
|---------------------------------------|------------------------------|--------------------|------------------------------|--------------------|
|                                       | <i>Cohen's d<sup>a</sup></i> | <i>FDR P-value</i> | <i>Cohen's d<sup>a</sup></i> | <i>FDR P-value</i> |
| Left banks superior temporal sulcus   | -0.156                       | 0.028              |                              |                    |
| Left caudal anterior cingulate cortex |                              |                    |                              |                    |
| Left caudal middle frontal gyrus      | -0.221                       | 0.002              | -0.273                       | 0.017              |
| Left cuneus                           |                              |                    |                              |                    |
| Left entorhinal cortex                |                              |                    |                              |                    |
| Left fusiform gyrus                   |                              |                    |                              |                    |
| Left inferior parietal cortex         |                              |                    |                              |                    |
| Left inferior temporal cortex gyrus   | -0.189                       | 0.008              |                              |                    |
| Left isthmus cingulate cortex         |                              |                    |                              |                    |
| Left lateral occipital cortex         |                              |                    |                              |                    |
| Left lateral orbitofrontal cortex     | -0.191                       | 0.021              |                              |                    |
| Left lingual gyrus                    |                              |                    |                              |                    |
| Left medial orbitofrontal cortex      | -0.186                       | 0.023              |                              |                    |
| Left middle temporal gyrus            | -0.247                       | 0.006              | -0.231                       | 0.039              |
| Left parahippocampal gyrus            |                              |                    |                              |                    |
| Left paracentral lobule               |                              |                    |                              |                    |
| Left pars opercularis                 | -0.200                       | 0.014              | -0.221                       | 0.039              |
| Left pars orbitalis                   |                              |                    |                              |                    |
| Left pars triangularis                |                              |                    | -0.288                       | 0.016              |
| Left pericalcarine gyrus              |                              |                    |                              |                    |
| Left postcentral gyrus                |                              |                    |                              |                    |
| Left posterior cingulate cortex       |                              |                    |                              |                    |
| Left precentral gyrus                 |                              |                    | -0.220                       | 0.039              |
| Left precuneus                        |                              |                    |                              |                    |

|                                        |        |       |        |       |
|----------------------------------------|--------|-------|--------|-------|
| Left rostral anterior cingulate cortex |        |       |        |       |
| Left rostral middle frontal gyrus      | -0.226 | 0.015 |        |       |
| Left superior frontal gyrus            | -0.246 | 0.020 |        |       |
| Left superior parietal cortex          |        |       |        |       |
| Left superior temporal gyrus           |        |       | -0.250 | 0.035 |
| Left supramarginal gyrus               |        |       | -0.232 | 0.039 |
| Left frontal pole                      | -0.146 | 0.042 |        |       |
| Left temporal pole                     |        |       |        |       |
| Left transverse temporal cortex        |        |       |        |       |
| Left insula                            |        |       |        |       |
| Left cortical thickness                | -0.234 | 0.028 | -0.274 | 0.035 |
| Right banks superior temporal sulcus   |        |       |        |       |
| Right caudal anterior cingulate cortex |        |       |        |       |
| Right caudal middle frontal gyrus      | -0.230 | 0.012 | -0.288 | 0.035 |
| Right cuneus                           |        |       |        |       |
| Right entorhinal cortex                |        |       |        |       |
| Right fusiform gyrus                   | -0.211 | 0.014 |        |       |
| Right inferior parietal cortex         |        |       |        |       |
| Right inferior temporal cortex gyrus   | -0.185 | 0.008 |        |       |
| Right isthmus cingulate cortex         |        |       |        |       |
| Right lateral occipital cortex         |        |       |        |       |
| Right lateral orbitofrontal cortex     | -0.217 | 0.006 |        |       |
| Right lingual gyrus                    |        |       |        |       |
| Right medial orbitofrontal cortex      | -0.213 | 0.035 |        |       |
| Right middle temporal gyrus            |        |       |        |       |
| Right parahippocampal gyrus            |        |       |        |       |
| Right paracentral lobule               |        |       |        |       |

|                                         |  |  |  |  |
|-----------------------------------------|--|--|--|--|
| Right pars opercularis                  |  |  |  |  |
| Right pars orbitalis                    |  |  |  |  |
| Right pars triangularis                 |  |  |  |  |
| Right pericalcarine gyrus               |  |  |  |  |
| Right postcentral gyrus                 |  |  |  |  |
| Right posterior cingulate cortex        |  |  |  |  |
| Right precentral gyrus                  |  |  |  |  |
| Right precuneus                         |  |  |  |  |
| Right rostral anterior cingulate cortex |  |  |  |  |
| Right rostral middle frontal gyrus      |  |  |  |  |
| Right superior frontal gyrus            |  |  |  |  |
| Right superior parietal cortex          |  |  |  |  |
| Right superior temporal gyrus           |  |  |  |  |
| Right supramarginal gyrus               |  |  |  |  |
| Right frontal pole                      |  |  |  |  |
| Right temporal pole                     |  |  |  |  |
| Right transverse temporal cortex        |  |  |  |  |
| Right insula                            |  |  |  |  |
| Right cortical thickness                |  |  |  |  |

**TABLE S29b:** Overview of the effect sizes of significant results ( $q < 0.05$ ) detected by the adult meta-analysis on surface area controlled for age, sex, scan center and ICV.

|                                       | OCD vs HC                    |                    | Med vs HC                    |                    | Adult Onset vs HC            |                    | NoCurAnx vs HC               |                    | CurAnx vs NoCurAnx           |                    | NoCurDep vs HC               |                    |
|---------------------------------------|------------------------------|--------------------|------------------------------|--------------------|------------------------------|--------------------|------------------------------|--------------------|------------------------------|--------------------|------------------------------|--------------------|
|                                       | <i>Cohen's d<sup>a</sup></i> | <i>FDR P-value</i> |
| Left banks superior temporal sulcus   |                              |                    |                              |                    |                              |                    |                              |                    |                              |                    |                              |                    |
| Left caudal anterior cingulate cortex |                              |                    |                              |                    |                              |                    |                              |                    |                              |                    |                              |                    |
| Left caudal middle frontal gyrus      |                              |                    |                              |                    |                              |                    |                              |                    |                              |                    |                              |                    |
| Left cuneus                           |                              |                    |                              |                    |                              |                    |                              |                    |                              |                    |                              |                    |
| Left entorhinal cortex                |                              |                    |                              |                    |                              |                    |                              |                    |                              |                    |                              |                    |
| Left fusiform gyrus                   |                              |                    |                              |                    |                              |                    |                              |                    |                              |                    |                              |                    |
| Left inferior parietal cortex         |                              |                    |                              |                    |                              |                    |                              |                    |                              |                    |                              |                    |
| Left inferior temporal cortex gyrus   |                              |                    |                              |                    |                              |                    |                              |                    |                              |                    |                              |                    |
| Left isthmus cingulate cortex         |                              |                    |                              |                    |                              |                    |                              |                    |                              |                    |                              |                    |
| Left lateral occipital cortex         |                              |                    |                              |                    |                              |                    |                              |                    |                              |                    |                              |                    |
| Left lateral orbitofrontal cortex     |                              |                    |                              |                    |                              |                    |                              |                    |                              |                    |                              |                    |
| Left lingual gyrus                    |                              |                    |                              |                    |                              |                    |                              |                    |                              |                    |                              |                    |
| Left medial orbitofrontal cortex      |                              |                    |                              |                    |                              |                    |                              |                    |                              |                    |                              |                    |
| Left middle temporal gyrus            |                              |                    |                              |                    |                              |                    |                              |                    |                              |                    |                              |                    |
| Left parahippocampal gyrus            |                              |                    |                              |                    |                              |                    |                              |                    |                              |                    |                              |                    |
| Left paracentral lobule               |                              |                    |                              |                    |                              |                    |                              |                    |                              |                    |                              |                    |
| Left pars opercularis                 |                              |                    |                              |                    | -0.185                       | 0.011              |                              |                    |                              |                    |                              |                    |
| Left pars orbitalis                   |                              |                    |                              |                    |                              |                    |                              |                    |                              |                    |                              |                    |
| Left pars triangularis                |                              |                    |                              |                    |                              |                    |                              |                    |                              |                    |                              |                    |
| Left pericalcarine gyrus              |                              |                    |                              |                    |                              |                    |                              |                    |                              |                    |                              |                    |
| Left postcentral gyrus                |                              |                    |                              |                    |                              |                    |                              |                    |                              |                    |                              |                    |
| Left posterior cingulate cortex       |                              |                    |                              |                    |                              |                    |                              |                    |                              |                    |                              |                    |
| Left precentral gyrus                 |                              |                    |                              |                    |                              |                    |                              |                    |                              |                    |                              |                    |
| Left precuneus                        |                              |                    |                              |                    |                              |                    |                              |                    |                              |                    |                              |                    |



|                                        |        |       |        |       |  |  |        |       |       |       |        |       |
|----------------------------------------|--------|-------|--------|-------|--|--|--------|-------|-------|-------|--------|-------|
| Left rostral anterior cingulate cortex |        |       |        |       |  |  |        |       |       |       |        |       |
| Left rostral middle frontal gyrus      |        |       |        |       |  |  |        |       |       |       |        |       |
| Left superior frontal gyrus            |        |       |        |       |  |  |        |       |       |       |        |       |
| Left superior parietal cortex          |        |       |        |       |  |  |        |       |       |       |        |       |
| Left superior temporal gyrus           |        |       |        |       |  |  |        |       |       |       |        |       |
| Left supramarginal gyrus               |        |       |        |       |  |  |        |       |       |       |        |       |
| Left frontal pole                      |        |       |        |       |  |  |        |       |       |       |        |       |
| Left temporal pole                     |        |       |        |       |  |  |        |       |       |       |        |       |
| Left transverse temporal cortex        | -0.169 | 0.001 | -0.209 | 0.006 |  |  | -0.183 | 0.019 |       |       | -0.155 | 0.013 |
| Left insula                            |        |       |        |       |  |  |        |       |       |       |        |       |
| Left cortical thickness                |        |       |        |       |  |  |        |       |       |       |        |       |
| Right banks superior temporal sulcus   |        |       |        |       |  |  |        |       |       |       |        |       |
| Right caudal anterior cingulate cortex |        |       |        |       |  |  |        |       |       |       |        |       |
| Right caudal middle frontal gyrus      |        |       |        |       |  |  |        |       |       |       |        |       |
| Right cuneus                           |        |       |        |       |  |  |        |       | 0.365 | 0.019 |        |       |
| Right entorhinal cortex                |        |       |        |       |  |  |        |       |       |       |        |       |
| Right fusiform gyrus                   |        |       |        |       |  |  |        |       |       |       |        |       |
| Right inferior parietal cortex         |        |       |        |       |  |  |        |       |       |       |        |       |
| Right inferior temporal cortex gyrus   |        |       |        |       |  |  |        |       |       |       |        |       |
| Right isthmus cingulate cortex         |        |       |        |       |  |  |        |       |       |       |        |       |
| Right lateral occipital cortex         |        |       |        |       |  |  |        |       |       |       |        |       |
| Right lateral orbitofrontal cortex     |        |       |        |       |  |  |        |       |       |       |        |       |
| Right lingual gyrus                    |        |       |        |       |  |  |        |       |       |       |        |       |
| Right medial orbitofrontal cortex      |        |       |        |       |  |  |        |       |       |       |        |       |
| Right middle temporal gyrus            |        |       |        |       |  |  |        |       |       |       |        |       |
| Right parahippocampal gyrus            |        |       |        |       |  |  |        |       |       |       |        |       |
| Right paracentral lobule               |        |       |        |       |  |  |        |       |       |       |        |       |

|                                         |  |  |  |  |  |  |  |  |  |  |  |  |  |
|-----------------------------------------|--|--|--|--|--|--|--|--|--|--|--|--|--|
| Right pars opercularis                  |  |  |  |  |  |  |  |  |  |  |  |  |  |
| Right pars orbitalis                    |  |  |  |  |  |  |  |  |  |  |  |  |  |
| Right pars triangularis                 |  |  |  |  |  |  |  |  |  |  |  |  |  |
| Right pericalcarine gyrus               |  |  |  |  |  |  |  |  |  |  |  |  |  |
| Right postcentral gyrus                 |  |  |  |  |  |  |  |  |  |  |  |  |  |
| Right posterior cingulate cortex        |  |  |  |  |  |  |  |  |  |  |  |  |  |
| Right precentral gyrus                  |  |  |  |  |  |  |  |  |  |  |  |  |  |
| Right precuneus                         |  |  |  |  |  |  |  |  |  |  |  |  |  |
| Right rostral anterior cingulate cortex |  |  |  |  |  |  |  |  |  |  |  |  |  |
| Right rostral middle frontal gyrus      |  |  |  |  |  |  |  |  |  |  |  |  |  |
| Right superior frontal gyrus            |  |  |  |  |  |  |  |  |  |  |  |  |  |
| Right superior parietal cortex          |  |  |  |  |  |  |  |  |  |  |  |  |  |
| Right superior temporal gyrus           |  |  |  |  |  |  |  |  |  |  |  |  |  |
| Right supramarginal gyrus               |  |  |  |  |  |  |  |  |  |  |  |  |  |
| Right frontal pole                      |  |  |  |  |  |  |  |  |  |  |  |  |  |
| Right temporal pole                     |  |  |  |  |  |  |  |  |  |  |  |  |  |
| Right transverse temporal cortex        |  |  |  |  |  |  |  |  |  |  |  |  |  |
| Right insula                            |  |  |  |  |  |  |  |  |  |  |  |  |  |
| Right surface area                      |  |  |  |  |  |  |  |  |  |  |  |  |  |
| Full surface area                       |  |  |  |  |  |  |  |  |  |  |  |  |  |

**TABLE S30a:** Full meta-analytic results for cortical thickness of each structure for the adult OCD patients compared with adult healthy controls, controlling for age, sex and scan center.

|                                               | <b>Cohen's d<br/>(OCD vs HC)</b> | <b>Standard Error</b> | <b>P-value</b> | <b>FDR P-value</b> | <b>N Controls</b> | <b>N patients</b> |
|-----------------------------------------------|----------------------------------|-----------------------|----------------|--------------------|-------------------|-------------------|
| <b>Left inferior parietal cortex</b>          | -0.133                           | 0.053                 | 0.012          | 0.340              | 1364              | 1434              |
| <b>Left middle temporal cortex</b>            | -0.132                           | 0.059                 | 0.024          | 0.358              | 1320              | 1367              |
| <b>Right inferior parietal cortex</b>         | -0.132                           | 0.046                 | 0.004          | 0.269              | 1379              | 1452              |
| <b>Right middle temporal cortex</b>           | -0.109                           | 0.062                 | 0.079          | 0.396              | 1402              | 1467              |
| <b>Right medial orbitofrontal cortex</b>      | -0.109                           | 0.045                 | 0.015          | 0.340              | 1428              | 1487              |
| <b>Left rostral middle frontal gyrus</b>      | -0.099                           | 0.047                 | 0.036          | 0.358              | 1429              | 1485              |
| <b>Right fusiform gyrus</b>                   | -0.098                           | 0.054                 | 0.067          | 0.396              | 1428              | 1460              |
| <b>Right lateral orbitofrontal cortex</b>     | -0.095                           | 0.045                 | 0.035          | 0.358              | 1431              | 1497              |
| <b>Left cortical thickness</b>                | -0.095                           | 0.053                 | 0.074          | 0.396              | 1435              | 1498              |
| <b>Left inferior temporal cortex</b>          | -0.094                           | 0.046                 | 0.042          | 0.369              | 1383              | 1470              |
| <b>Left fusiform gyrus</b>                    | -0.094                           | 0.056                 | 0.091          | 0.422              | 1428              | 1488              |
| <b>Right rostral middle frontal gyrus</b>     | -0.091                           | 0.048                 | 0.058          | 0.396              | 1424              | 1493              |
| <b>Left medial orbitofrontal cortex</b>       | -0.090                           | 0.046                 | 0.048          | 0.377              | 1430              | 1490              |
| <b>Right precuneus</b>                        | -0.087                           | 0.057                 | 0.125          | 0.443              | 1429              | 1491              |
| <b>Left rostral anterior cingulate cortex</b> | -0.083                           | 0.038                 | 0.028          | 0.358              | 1415              | 1473              |
| <b>Left precuneus</b>                         | -0.079                           | 0.054                 | 0.146          | 0.443              | 1426              | 1493              |
| <b>Right paracentral lobule</b>               | -0.078                           | 0.055                 | 0.153          | 0.443              | 1420              | 1487              |
| <b>Right cortical thickness</b>               | -0.075                           | 0.056                 | 0.185          | 0.478              | 1435              | 1493              |
| <b>Right lateral occipital cortex</b>         | -0.073                           | 0.041                 | 0.079          | 0.396              | 1421              | 1479              |
| <b>Left caudal middle frontal gyrus</b>       | -0.072                           | 0.045                 | 0.104          | 0.443              | 1429              | 1478              |
| <b>Left lateral orbitofrontal cortex</b>      | -0.072                           | 0.050                 | 0.146          | 0.443              | 1433              | 1494              |
| <b>Right caudal middle frontal gyrus</b>      | -0.070                           | 0.049                 | 0.155          | 0.443              | 1423              | 1485              |
| <b>Left posterior cingulate cortex</b>        | -0.070                           | 0.044                 | 0.108          | 0.443              | 1431              | 1492              |
| <b>Left lateral occipital cortex</b>          | -0.065                           | 0.046                 | 0.158          | 0.443              | 1419              | 1480              |
| <b>Left banks superior temporal sulcus</b>    | -0.065                           | 0.043                 | 0.133          | 0.443              | 1284              | 1357              |
| <b>Left pars opercularis</b>                  | -0.064                           | 0.043                 | 0.139          | 0.443              | 1427              | 1489              |

|                                        |        |       |       |       |      |      |
|----------------------------------------|--------|-------|-------|-------|------|------|
| Left entorhinal cortex                 | -0.063 | 0.053 | 0.230 | 0.520 | 1318 | 1381 |
| Left insula                            | -0.057 | 0.046 | 0.215 | 0.520 | 1414 | 1471 |
| Left superior frontal cortex           | -0.056 | 0.056 | 0.317 | 0.594 | 1413 | 1437 |
| Right insula                           | -0.055 | 0.048 | 0.253 | 0.553 | 1415 | 1462 |
| Left isthmus cingulate cortex          | -0.054 | 0.051 | 0.283 | 0.573 | 1431 | 1492 |
| Right inferior temporal cortex         | -0.053 | 0.039 | 0.169 | 0.456 | 1400 | 1488 |
| Left pars orbitalis                    | -0.052 | 0.040 | 0.191 | 0.478 | 1431 | 1489 |
| Right pars triangularis                | -0.050 | 0.051 | 0.334 | 0.594 | 1423 | 1462 |
| Right posterior cingulate cortex       | -0.050 | 0.048 | 0.297 | 0.578 | 1427 | 1492 |
| Right pars orbitalis                   | -0.046 | 0.043 | 0.286 | 0.573 | 1431 | 1495 |
| Right isthmus cingulate cortex         | -0.044 | 0.053 | 0.406 | 0.676 | 1429 | 1496 |
| Left superior parietal cortex          | -0.044 | 0.061 | 0.476 | 0.676 | 1417 | 1469 |
| Left parahippocampal gyrus             | -0.043 | 0.046 | 0.340 | 0.594 | 1424 | 1489 |
| Left supramarginal gyrus               | -0.040 | 0.052 | 0.444 | 0.676 | 1310 | 1363 |
| Right superior parietal cortex         | -0.039 | 0.055 | 0.480 | 0.676 | 1411 | 1468 |
| Right pars opercularis                 | -0.038 | 0.049 | 0.428 | 0.676 | 1418 | 1478 |
| Left pars triangularis                 | -0.036 | 0.043 | 0.398 | 0.676 | 1434 | 1491 |
| Left frontal pole                      | -0.034 | 0.045 | 0.453 | 0.676 | 1435 | 1490 |
| Right superior frontal cortex          | -0.029 | 0.056 | 0.608 | 0.819 | 1410 | 1478 |
| Right transverse temporal cortex       | -0.028 | 0.038 | 0.460 | 0.676 | 1434 | 1496 |
| Left precentral gyrus                  | -0.024 | 0.046 | 0.592 | 0.812 | 1408 | 1471 |
| Left lingual gyrus                     | -0.019 | 0.047 | 0.685 | 0.830 | 1427 | 1490 |
| Right caudal anterior cingulate cortex | -0.019 | 0.045 | 0.675 | 0.830 | 1422 | 1482 |
| Right cuneus                           | -0.015 | 0.044 | 0.735 | 0.838 | 1401 | 1464 |
| Right precentral gyrus                 | -0.008 | 0.057 | 0.885 | 0.953 | 1405 | 1454 |
| Left cuneus                            | -0.008 | 0.049 | 0.879 | 0.953 | 1404 | 1465 |
| Left superior temporal cortex          | -0.004 | 0.049 | 0.931 | 0.981 | 1296 | 1331 |
| Right banks superior temporal sulcus   | -0.004 | 0.052 | 0.939 | 0.981 | 1321 | 1390 |
| Right lingual gyrus                    | -0.002 | 0.048 | 0.972 | 0.986 | 1433 | 1492 |
| Left postcentral gyrus                 | -0.002 | 0.050 | 0.975 | 0.986 | 1403 | 1465 |
| Left caudal anterior cingulate cortex  | -0.001 | 0.038 | 0.986 | 0.986 | 1415 | 1473 |

|                                                |       |       |       |       |      |      |
|------------------------------------------------|-------|-------|-------|-------|------|------|
| <b>Left paracentral lobule</b>                 | 0.011 | 0.054 | 0.845 | 0.939 | 1430 | 1490 |
| <b>Right superior temporal cortex</b>          | 0.013 | 0.039 | 0.743 | 0.838 | 1316 | 1380 |
| <b>Right frontal pole</b>                      | 0.013 | 0.038 | 0.731 | 0.838 | 1434 | 1495 |
| <b>Right parahippocampal gyrus</b>             | 0.016 | 0.042 | 0.700 | 0.830 | 1432 | 1493 |
| <b>Right rostral anterior cingulate cortex</b> | 0.017 | 0.044 | 0.690 | 0.830 | 1413 | 1474 |
| <b>Left transverse temporal cortex</b>         | 0.018 | 0.046 | 0.692 | 0.830 | 1433 | 1493 |
| <b>Right entorhinal cortex</b>                 | 0.023 | 0.051 | 0.650 | 0.830 | 1244 | 1334 |
| <b>Right supramarginal gyrus</b>               | 0.027 | 0.061 | 0.656 | 0.830 | 1321 | 1388 |
| <b>Right temporal pole</b>                     | 0.027 | 0.039 | 0.483 | 0.676 | 1430 | 1463 |
| <b>Left temporal pole</b>                      | 0.029 | 0.038 | 0.437 | 0.676 | 1435 | 1493 |
| <b>Left pericalcarine gyrus</b>                | 0.056 | 0.051 | 0.270 | 0.572 | 1406 | 1482 |
| <b>Right pericalcarine gyrus</b>               | 0.059 | 0.048 | 0.223 | 0.520 | 1409 | 1477 |
| <b>Right postcentral gyrus</b>                 | 0.062 | 0.063 | 0.326 | 0.594 | 1414 | 1473 |

**TABLE S30b:** Full meta-analytic results for cortical surface area of each structure for the adult OCD patients compared with adult healthy controls, controlling for age, sex, scan center and ICV.

|                                         | <b>Cohen's d<sup>a</sup><br/>(OCD vs HC)</b> | <b>Standard Error</b> | <b>P-value</b> | <b>FDR P-value</b> | <b>N controls</b> | <b>N patients</b> |
|-----------------------------------------|----------------------------------------------|-----------------------|----------------|--------------------|-------------------|-------------------|
| Left transverse temporal gyrus          | -0.169                                       | 0.038                 | 0.000          | 0.001              | 1431              | 1492              |
| Right superior temporal gyrus           | -0.125                                       | 0.039                 | 0.002          | 0.055              | 1314              | 1379              |
| Right transverse temporal gyrus         | -0.107                                       | 0.038                 | 0.005          | 0.110              | 1432              | 1495              |
| Right supramarginal gyrus               | -0.100                                       | 0.048                 | 0.036          | 0.302              | 1319              | 1387              |
| Left pars opercularis                   | -0.099                                       | 0.038                 | 0.009          | 0.131              | 1425              | 1488              |
| Left pars triangularis                  | -0.098                                       | 0.038                 | 0.009          | 0.131              | 1432              | 1490              |
| Right posterior cingulate cortex        | -0.090                                       | 0.064                 | 0.159          | 0.653              | 1425              | 1491              |
| Left superior temporal gyrus            | -0.084                                       | 0.040                 | 0.036          | 0.302              | 1294              | 1330              |
| Left superior parietal cortex           | -0.081                                       | 0.050                 | 0.104          | 0.522              | 1415              | 1468              |
| Left superior frontal gyrus             | -0.080                                       | 0.038                 | 0.038          | 0.302              | 1411              | 1436              |
| Left surface area                       | -0.078                                       | 0.038                 | 0.039          | 0.302              | 1433              | 1497              |
| Right rostral anterior cingulate cortex | -0.075                                       | 0.046                 | 0.104          | 0.522              | 1411              | 1474              |
| Right superior frontal gyrus            | -0.072                                       | 0.040                 | 0.072          | 0.461              | 1408              | 1477              |
| Left postcentral gyrus                  | -0.070                                       | 0.038                 | 0.067          | 0.461              | 1401              | 1464              |
| Left supramarginal gyrus                | -0.068                                       | 0.040                 | 0.087          | 0.509              | 1308              | 1362              |
| Left lateral orbitofrontal cortex       | -0.059                                       | 0.048                 | 0.220          | 0.840              | 1431              | 1493              |
| Right superior parietal cortex          | -0.056                                       | 0.049                 | 0.258          | 0.840              | 1409              | 1467              |
| Left lateral occipital cortex           | -0.055                                       | 0.052                 | 0.289          | 0.840              | 1417              | 1479              |
| Right surface area                      | -0.053                                       | 0.038                 | 0.158          | 0.653              | 1434              | 1495              |
| Left insula                             | -0.050                                       | 0.047                 | 0.291          | 0.840              | 1412              | 1470              |
| Left frontal pole                       | -0.048                                       | 0.053                 | 0.365          | 0.902              | 1433              | 1489              |
| Right caudal anterior cingulate cortex  | -0.048                                       | 0.056                 | 0.392          | 0.906              | 1420              | 1481              |
| Right pars opercularis                  | -0.046                                       | 0.038                 | 0.230          | 0.840              | 1416              | 1478              |
| Right fusiform gyrus                    | -0.042                                       | 0.055                 | 0.443          | 0.906              | 1426              | 1459              |
| Right middle temporal gyrus             | -0.042                                       | 0.038                 | 0.268          | 0.840              | 1401              | 1467              |
| Left posterior cingulate cortex         | -0.040                                       | 0.053                 | 0.446          | 0.906              | 1429              | 1491              |

|                                        |        |       |       |       |      |      |
|----------------------------------------|--------|-------|-------|-------|------|------|
| Left inferior temporal cortex gyrus    | -0.039 | 0.038 | 0.310 | 0.840 | 1382 | 1469 |
| Right lateral occipital cortex         | -0.039 | 0.038 | 0.309 | 0.840 | 1419 | 1478 |
| Right pericalcarine gyrus              | -0.038 | 0.038 | 0.312 | 0.840 | 1407 | 1476 |
| Left caudal middle frontal gyrus       | -0.036 | 0.044 | 0.408 | 0.906 | 1427 | 1477 |
| Right isthmus cingulate cortex         | -0.031 | 0.040 | 0.432 | 0.906 | 1427 | 1495 |
| Left isthmus cingulate cortex          | -0.029 | 0.047 | 0.536 | 0.948 | 1429 | 1491 |
| Left pars orbitalis                    | -0.028 | 0.038 | 0.453 | 0.906 | 1429 | 1488 |
| Right lingual gyrus                    | -0.025 | 0.038 | 0.512 | 0.948 | 1431 | 1491 |
| Right insula                           | -0.024 | 0.044 | 0.582 | 0.948 | 1413 | 1461 |
| Left lingual gyrus                     | -0.022 | 0.048 | 0.645 | 0.948 | 1425 | 1489 |
| Left paracentral lobule                | -0.021 | 0.044 | 0.633 | 0.948 | 1428 | 1489 |
| Left entorhinal cortex                 | -0.020 | 0.051 | 0.700 | 0.948 | 1316 | 1381 |
| Right pars triangularis                | -0.018 | 0.047 | 0.697 | 0.948 | 1421 | 1461 |
| Left pericalcarine gyrus               | -0.017 | 0.038 | 0.664 | 0.948 | 1404 | 1481 |
| Left rostral anterior cingulate cortex | -0.013 | 0.053 | 0.810 | 0.948 | 1413 | 1472 |
| Right precentral gyrus                 | -0.013 | 0.038 | 0.742 | 0.948 | 1403 | 1453 |
| Left medial orbitofrontal cortex       | -0.011 | 0.038 | 0.766 | 0.948 | 1428 | 1489 |
| Left cuneus                            | -0.009 | 0.041 | 0.829 | 0.948 | 1402 | 1464 |
| Right postcentral gyrus                | -0.008 | 0.043 | 0.856 | 0.952 | 1412 | 1472 |
| Left temporal pole                     | -0.005 | 0.038 | 0.902 | 0.987 | 1434 | 1492 |
| Right cuneus                           | -0.004 | 0.052 | 0.936 | 0.993 | 1399 | 1463 |
| Left precentral gyrus                  | -0.002 | 0.038 | 0.962 | 0.995 | 1406 | 1470 |
| Left middle temporal gyrus             | -0.002 | 0.039 | 0.968 | 0.995 | 1319 | 1366 |
| Right pars orbitalis                   | -0.001 | 0.051 | 0.982 | 0.995 | 1429 | 1494 |
| Right caudal middle frontal gyrus      | 0.000  | 0.042 | 0.995 | 0.995 | 1421 | 1484 |
| Right precuneus                        | 0.005  | 0.057 | 0.936 | 0.993 | 1427 | 1490 |
| Right paracentral lobule               | 0.008  | 0.038 | 0.840 | 0.948 | 1430 | 1492 |
| Right rostral middle frontal gyrus     | 0.010  | 0.044 | 0.819 | 0.948 | 1422 | 1492 |
| Left rostral middle frontal gyrus      | 0.011  | 0.045 | 0.802 | 0.948 | 1427 | 1484 |

|                                              |       |       |       |       |      |      |
|----------------------------------------------|-------|-------|-------|-------|------|------|
| <b>Right lateral orbitofrontal cortex</b>    | 0.011 | 0.038 | 0.762 | 0.948 | 1429 | 1496 |
| <b>Left fusiform gyrus</b>                   | 0.013 | 0.038 | 0.740 | 0.948 | 1426 | 1487 |
| <b>Right parahippocampal gyrus</b>           | 0.013 | 0.052 | 0.803 | 0.948 | 1418 | 1486 |
| <b>Left banks superior temporal sulcus</b>   | 0.014 | 0.040 | 0.733 | 0.948 | 1282 | 1356 |
| <b>Left caudal anterior cingulate cortex</b> | 0.014 | 0.042 | 0.733 | 0.948 | 1413 | 1472 |
| <b>Right temporal pole</b>                   | 0.016 | 0.052 | 0.759 | 0.948 | 1428 | 1462 |
| <b>Right frontal pole</b>                    | 0.017 | 0.038 | 0.661 | 0.948 | 1432 | 1494 |
| <b>Right inferior temporal cortex gyrus</b>  | 0.024 | 0.042 | 0.576 | 0.948 | 1399 | 1487 |
| <b>Right banks superior temporal sulcus</b>  | 0.024 | 0.039 | 0.535 | 0.948 | 1319 | 1389 |
| <b>Right medial orbitofrontal cortex</b>     | 0.024 | 0.038 | 0.518 | 0.948 | 1426 | 1487 |
| <b>Left inferior parietal cortex</b>         | 0.028 | 0.051 | 0.581 | 0.948 | 1363 | 1433 |
| <b>Right entorhinal cortex</b>               | 0.030 | 0.057 | 0.605 | 0.948 | 1242 | 1333 |
| <b>Left parahippocampal gyrus</b>            | 0.034 | 0.038 | 0.374 | 0.902 | 1422 | 1488 |
| <b>Left precuneus</b>                        | 0.040 | 0.044 | 0.358 | 0.902 | 1424 | 1492 |
| <b>Right inferior parietal cortex</b>        | 0.073 | 0.049 | 0.138 | 0.643 | 1377 | 1451 |



**TABLE S31:** Overview of the effect sizes of significant results ( $q < 0.05$ ) detected by the pediatric meta-analysis on surface area controlled for age, sex, scan center and ICV.

|                                       | Med vs Unmedicated OCD patients |                    | NoCurAnx vs HC               |                    |
|---------------------------------------|---------------------------------|--------------------|------------------------------|--------------------|
|                                       | <i>Cohen's d<sup>a</sup></i>    | <i>FDR P-value</i> | <i>Cohen's d<sup>a</sup></i> | <i>FDR P-value</i> |
| Left banks superior temporal sulcus   |                                 |                    |                              |                    |
| Left caudal anterior cingulate cortex |                                 |                    |                              |                    |
| Left caudal middle frontal gyrus      |                                 |                    |                              |                    |
| Left cuneus                           |                                 |                    |                              |                    |
| Left entorhinal cortex                |                                 |                    |                              |                    |
| Left fusiform gyrus                   |                                 |                    |                              |                    |
| Left inferior parietal cortex         |                                 |                    |                              |                    |
| Left inferior temporal cortex gyrus   |                                 |                    |                              |                    |
| Left isthmus cingulate cortex         |                                 |                    |                              |                    |
| Left lateral occipital cortex         |                                 |                    |                              |                    |
| Left lateral orbitofrontal cortex     |                                 |                    |                              |                    |
| Left lingual gyrus                    |                                 |                    |                              |                    |
| Left medial orbitofrontal cortex      |                                 |                    |                              |                    |
| Left middle temporal gyrus            |                                 |                    |                              |                    |
| Left parahippocampal gyrus            |                                 |                    |                              |                    |
| Left paracentral lobule               |                                 |                    |                              |                    |
| Left pars opercularis                 |                                 |                    |                              |                    |
| Left pars orbitalis                   |                                 |                    |                              |                    |
| Left pars triangularis                |                                 |                    |                              |                    |
| Left pericalcarine gyrus              |                                 |                    |                              |                    |
| Left postcentral gyrus                |                                 |                    |                              |                    |
| Left posterior cingulate cortex       |                                 |                    |                              |                    |
| Left precentral gyrus                 |                                 |                    |                              |                    |

|                                        |  |  |        |       |
|----------------------------------------|--|--|--------|-------|
| Left precuneus                         |  |  |        |       |
| Left rostral anterior cingulate cortex |  |  |        |       |
| Left rostral middle frontal gyrus      |  |  | -0.364 | 0.030 |
| Left superior frontal gyrus            |  |  |        |       |
| Left superior parietal cortex          |  |  |        |       |
| Left superior temporal gyrus           |  |  |        |       |
| Left supramarginal gyrus               |  |  |        |       |
| Left frontal pole                      |  |  |        |       |
| Left temporal pole                     |  |  |        |       |
| Left transverse temporal cortex        |  |  |        |       |
| Left insula                            |  |  |        |       |
| Left cortical thickness                |  |  |        |       |
| Right banks superior temporal sulcus   |  |  |        |       |
| Right caudal anterior cingulate cortex |  |  |        |       |
| Right caudal middle frontal gyrus      |  |  |        |       |
| Right cuneus                           |  |  |        |       |
| Right entorhinal cortex                |  |  |        |       |
| Right fusiform gyrus                   |  |  |        |       |
| Right inferior parietal cortex         |  |  |        |       |
| Right inferior temporal cortex gyrus   |  |  |        |       |
| Right isthmus cingulate cortex         |  |  |        |       |
| Right lateral occipital cortex         |  |  |        |       |
| Right lateral orbitofrontal cortex     |  |  |        |       |
| Right lingual gyrus                    |  |  |        |       |
| Right medial orbitofrontal cortex      |  |  |        |       |
| Right middle temporal gyrus            |  |  |        |       |
| Right parahippocampal gyrus            |  |  |        |       |

|                                         |        |       |  |  |
|-----------------------------------------|--------|-------|--|--|
| Right paracentral lobule                |        |       |  |  |
| Right pars opercularis                  |        |       |  |  |
| Right pars orbitalis                    |        |       |  |  |
| Right pars triangularis                 |        |       |  |  |
| Right pericalcarine gyrus               | -0.481 | 0.036 |  |  |
| Right postcentral gyrus                 |        |       |  |  |
| Right posterior cingulate cortex        |        |       |  |  |
| Right precentral gyrus                  |        |       |  |  |
| Right precuneus                         |        |       |  |  |
| Right rostral anterior cingulate cortex |        |       |  |  |
| Right rostral middle frontal gyrus      |        |       |  |  |
| Right superior frontal gyrus            |        |       |  |  |
| Right superior parietal cortex          |        |       |  |  |
| Right superior temporal gyrus           |        |       |  |  |
| Right supramarginal gyrus               |        |       |  |  |
| Right frontal pole                      |        |       |  |  |
| Right temporal pole                     |        |       |  |  |
| Right transverse temporal cortex        |        |       |  |  |
| Right insula                            |        |       |  |  |
| Right cortical thickness                |        |       |  |  |
| Full surface area                       |        |       |  |  |

**TABLE S32a:** Full meta-analytic results for cortical thickness of each structure for the pediatric OCD patients compared with pediatric healthy controls, controlling for age, sex and scan center.

|                                      | <b>Cohen's d<sup>a</sup><br/>(OCD vs HC)</b> | <b>Standard Error</b> | <b>P-value</b> | <b>FDR P-value</b> | <b>N controls</b> | <b>N patients</b> |
|--------------------------------------|----------------------------------------------|-----------------------|----------------|--------------------|-------------------|-------------------|
| Left inferior parietal cortex        | -0.310                                       | 0.144                 | 0.032          | 0.552              | 294               | 375               |
| Left superior parietal cortex        | -0.281                                       | 0.159                 | 0.076          | 0.669              | 309               | 391               |
| Right superior parietal cortex       | -0.271                                       | 0.138                 | 0.049          | 0.583              | 309               | 390               |
| Left lateral occipital cortex        | -0.258                                       | 0.095                 | 0.007          | 0.479              | 308               | 391               |
| Left cuneus                          | -0.223                                       | 0.092                 | 0.015          | 0.526              | 310               | 393               |
| Left precuneus                       | -0.179                                       | 0.142                 | 0.208          | 0.707              | 310               | 390               |
| Left cortical thickness              | -0.175                                       | 0.127                 | 0.167          | 0.707              | 312               | 394               |
| Left pericalcarine gyrus             | -0.173                                       | 0.077                 | 0.024          | 0.552              | 309               | 392               |
| Right inferior parietal cortex       | -0.173                                       | 0.173                 | 0.319          | 0.726              | 303               | 383               |
| Right lateral occipital cortex       | -0.163                                       | 0.123                 | 0.183          | 0.707              | 310               | 390               |
| Left banks superior temporal sulcus  | -0.163                                       | 0.086                 | 0.058          | 0.583              | 288               | 359               |
| Left posterior cingulate cortex      | -0.160                                       | 0.114                 | 0.162          | 0.707              | 309               | 388               |
| Left supramarginal gyrus             | -0.155                                       | 0.118                 | 0.189          | 0.707              | 293               | 377               |
| Right precuneus                      | -0.154                                       | 0.117                 | 0.188          | 0.707              | 312               | 388               |
| Left medial orbitofrontal cortex     | -0.149                                       | 0.077                 | 0.053          | 0.583              | 310               | 388               |
| Left paracentral lobule              | -0.148                                       | 0.114                 | 0.194          | 0.707              | 312               | 392               |
| Right cuneus                         | -0.143                                       | 0.087                 | 0.102          | 0.707              | 312               | 390               |
| Right cortical thickness             | -0.138                                       | 0.120                 | 0.248          | 0.724              | 312               | 394               |
| Left isthmus cingulate cortex        | -0.128                                       | 0.101                 | 0.202          | 0.707              | 311               | 386               |
| Right caudal middle frontal gyrus    | -0.128                                       | 0.110                 | 0.244          | 0.724              | 309               | 389               |
| Right pericalcarine gyrus            | -0.112                                       | 0.083                 | 0.180          | 0.707              | 312               | 389               |
| Right inferior temporal cortex gyrus | -0.110                                       | 0.077                 | 0.156          | 0.707              | 309               | 386               |
| Left inferior temporal cortex gyrus  | -0.106                                       | 0.097                 | 0.275          | 0.726              | 306               | 389               |
| Right posterior cingulate cortex     | -0.102                                       | 0.120                 | 0.397          | 0.727              | 310               | 387               |
| Left pars opercularis                | -0.099                                       | 0.111                 | 0.372          | 0.727              | 310               | 391               |

|                                         |        |       |       |       |     |     |
|-----------------------------------------|--------|-------|-------|-------|-----|-----|
| Right insula                            | -0.097 | 0.078 | 0.212 | 0.707 | 301 | 384 |
| Right postcentral gyrus                 | -0.097 | 0.078 | 0.210 | 0.707 | 305 | 385 |
| Right paracentral lobule                | -0.097 | 0.092 | 0.296 | 0.726 | 312 | 390 |
| Left postcentral gyrus                  | -0.096 | 0.103 | 0.352 | 0.726 | 305 | 382 |
| Right banks superior temporal sulcus    | -0.095 | 0.096 | 0.322 | 0.726 | 288 | 374 |
| Left fusiform gyrus                     | -0.095 | 0.121 | 0.432 | 0.727 | 302 | 388 |
| Left precentral gyrus                   | -0.091 | 0.113 | 0.418 | 0.727 | 305 | 385 |
| Left transverse temporal gyrus          | -0.088 | 0.113 | 0.436 | 0.727 | 310 | 391 |
| Right rostral anterior cingulate cortex | -0.087 | 0.078 | 0.268 | 0.726 | 298 | 386 |
| Left caudal middle frontal gyrus        | -0.084 | 0.133 | 0.527 | 0.769 | 311 | 392 |
| Right middle temporal gyrus             | -0.081 | 0.120 | 0.499 | 0.759 | 297 | 383 |
| Right pars triangularis                 | -0.080 | 0.087 | 0.353 | 0.726 | 312 | 392 |
| Left lingual gyrus                      | -0.075 | 0.077 | 0.329 | 0.726 | 309 | 391 |
| Left middle temporal gyrus              | -0.073 | 0.136 | 0.589 | 0.808 | 300 | 378 |
| Right rostral middle frontal gyrus      | -0.073 | 0.077 | 0.344 | 0.726 | 310 | 393 |
| Left frontal pole                       | -0.065 | 0.077 | 0.399 | 0.727 | 311 | 392 |
| Right pars opercularis                  | -0.063 | 0.077 | 0.414 | 0.727 | 306 | 391 |
| Right transverse temporal gyrus         | -0.062 | 0.086 | 0.468 | 0.735 | 308 | 394 |
| Right pars orbitalis                    | -0.058 | 0.077 | 0.450 | 0.732 | 311 | 393 |
| Left superior frontal gyrus             | -0.056 | 0.077 | 0.473 | 0.735 | 307 | 386 |
| Right precentral gyrus                  | -0.054 | 0.112 | 0.627 | 0.810 | 307 | 386 |
| Right parahippocampal gyrus             | -0.050 | 0.078 | 0.517 | 0.769 | 306 | 381 |
| Right supramarginal gyrus               | -0.048 | 0.119 | 0.688 | 0.847 | 299 | 379 |
| Left pars orbitalis                     | -0.046 | 0.077 | 0.548 | 0.783 | 311 | 390 |
| Left rostral middle frontal gyrus       | -0.043 | 0.077 | 0.577 | 0.808 | 312 | 394 |
| Left pars triangularis                  | -0.038 | 0.077 | 0.623 | 0.810 | 311 | 394 |
| Right isthmus cingulate cortex          | -0.036 | 0.077 | 0.637 | 0.810 | 310 | 387 |
| Right temporal pole                     | -0.033 | 0.087 | 0.704 | 0.850 | 310 | 385 |
| Right superior frontal gyrus            | -0.032 | 0.081 | 0.690 | 0.847 | 302 | 384 |

|                                        |        |       |       |       |     |     |
|----------------------------------------|--------|-------|-------|-------|-----|-----|
| Right fusiform gyrus                   | -0.024 | 0.109 | 0.827 | 0.940 | 302 | 385 |
| Left parahippocampal gyrus             | -0.021 | 0.092 | 0.819 | 0.940 | 305 | 382 |
| Right superior temporal gyrus          | -0.006 | 0.114 | 0.957 | 0.983 | 291 | 380 |
| Right lateral orbitofrontal cortex     | -0.004 | 0.077 | 0.954 | 0.983 | 310 | 392 |
| Left superior temporal gyrus           | -0.004 | 0.089 | 0.961 | 0.983 | 296 | 373 |
| Left insula                            | -0.004 | 0.099 | 0.965 | 0.983 | 303 | 381 |
| Left temporal pole                     | -0.003 | 0.078 | 0.968 | 0.983 | 309 | 389 |
| Right entorhinal cortex                | 0.000  | 0.106 | 0.998 | 0.998 | 265 | 336 |
| Right caudal anterior cingulate cortex | 0.012  | 0.101 | 0.909 | 0.983 | 300 | 388 |
| Right lingual gyrus                    | 0.015  | 0.077 | 0.843 | 0.940 | 311 | 393 |
| Left caudal anterior cingulate cortex  | 0.016  | 0.082 | 0.846 | 0.940 | 307 | 384 |
| Left entorhinal cortex                 | 0.031  | 0.117 | 0.789 | 0.936 | 278 | 360 |
| Right frontal pole                     | 0.038  | 0.077 | 0.626 | 0.810 | 307 | 393 |
| Left lateral orbitofrontal cortex      | 0.063  | 0.077 | 0.412 | 0.727 | 312 | 393 |
| Left rostral anterior cingulate cortex | 0.081  | 0.078 | 0.298 | 0.726 | 307 | 385 |
| Right medial orbitofrontal cortex      | 0.094  | 0.077 | 0.222 | 0.707 | 307 | 387 |

**TABLE S32b:** Full meta-analytic results for cortical surface area of each structure for the pediatric OCD patients compared with pediatric healthy controls, controlling for age, sex, scan center and ICV.

|                                       | Cohen's d <sup>a</sup> (OCD vs HC) | Standard Error | P-value | FDR P-value | N controls | N patients |
|---------------------------------------|------------------------------------|----------------|---------|-------------|------------|------------|
| Right paracentral lobule              | -0.219                             | 0.076          | 0.004   | 0.271       | 323        | 402        |
| Left posterior cingulate cortex       | -0.203                             | 0.079          | 0.010   | 0.367       | 320        | 400        |
| Right medial orbitofrontal cortex     | -0.200                             | 0.141          | 0.158   | 0.860       | 319        | 396        |
| Right superior frontal gyrus          | -0.181                             | 0.113          | 0.109   | 0.860       | 310        | 395        |
| Left lateral orbitofrontal cortex     | -0.171                             | 0.076          | 0.024   | 0.549       | 324        | 405        |
| Left rostral middle frontal gyrus     | -0.154                             | 0.114          | 0.177   | 0.860       | 321        | 405        |
| Left medial orbitofrontal cortex      | -0.145                             | 0.076          | 0.057   | 0.792       | 320        | 399        |
| Left postcentral gyrus                | -0.134                             | 0.077          | 0.082   | 0.860       | 312        | 390        |
| Right fusiform gyrus                  | -0.124                             | 0.092          | 0.178   | 0.860       | 314        | 397        |
| Left paracentral lobule               | -0.123                             | 0.121          | 0.307   | 0.860       | 321        | 402        |
| Left superior frontal gyrus           | -0.112                             | 0.110          | 0.307   | 0.860       | 316        | 396        |
| Right pars triangularis               | -0.110                             | 0.082          | 0.181   | 0.860       | 321        | 401        |
| Right rostral middle frontal gyrus    | -0.108                             | 0.092          | 0.243   | 0.860       | 317        | 403        |
| Right pars orbitalis                  | -0.106                             | 0.076          | 0.160   | 0.860       | 322        | 403        |
| Left pericalcarine gyrus              | -0.104                             | 0.086          | 0.226   | 0.860       | 320        | 401        |
| Left inferior parietal cortex         | -0.103                             | 0.116          | 0.374   | 0.932       | 301        | 384        |
| Right cuneus                          | -0.097                             | 0.076          | 0.200   | 0.860       | 323        | 400        |
| Right lateral orbitofrontal cortex    | -0.095                             | 0.080          | 0.233   | 0.860       | 322        | 404        |
| Right posterior cingulate cortex      | -0.092                             | 0.095          | 0.335   | 0.881       | 322        | 399        |
| Right superior parietal cortex        | -0.092                             | 0.111          | 0.408   | 0.932       | 320        | 400        |
| Left caudal anterior cingulate cortex | -0.088                             | 0.083          | 0.292   | 0.860       | 316        | 395        |
| Left pars orbitalis                   | -0.085                             | 0.077          | 0.270   | 0.860       | 322        | 402        |
| Right lateral occipital cortex        | -0.085                             | 0.082          | 0.303   | 0.860       | 321        | 400        |
| Right surface area                    | -0.083                             | 0.101          | 0.407   | 0.932       | 324        | 406        |
| Left cuneus                           | -0.081                             | 0.076          | 0.286   | 0.860       | 320        | 402        |

|                                         |        |       |       |       |     |     |
|-----------------------------------------|--------|-------|-------|-------|-----|-----|
| Right inferior parietal cortex          | -0.073 | 0.077 | 0.340 | 0.881 | 309 | 391 |
| Left insula                             | -0.066 | 0.082 | 0.426 | 0.932 | 315 | 388 |
| Left precuneus                          | -0.055 | 0.104 | 0.598 | 0.932 | 320 | 402 |
| Left frontal pole                       | -0.049 | 0.076 | 0.513 | 0.932 | 323 | 404 |
| Left superior parietal cortex           | -0.046 | 0.089 | 0.610 | 0.932 | 317 | 401 |
| Left pars opercularis                   | -0.045 | 0.118 | 0.701 | 0.932 | 319 | 398 |
| Right pericalcarine gyrus               | -0.044 | 0.076 | 0.559 | 0.932 | 323 | 400 |
| Right lingual gyrus                     | -0.042 | 0.076 | 0.579 | 0.932 | 323 | 405 |
| Right insula                            | -0.036 | 0.077 | 0.645 | 0.932 | 312 | 388 |
| Left surface area                       | -0.035 | 0.125 | 0.778 | 0.932 | 324 | 406 |
| Right postcentral gyrus                 | -0.028 | 0.077 | 0.715 | 0.932 | 309 | 392 |
| Left banks superior temporal sulcus     | -0.024 | 0.085 | 0.780 | 0.932 | 297 | 369 |
| Right parahippocampal gyrus             | -0.023 | 0.076 | 0.758 | 0.932 | 317 | 393 |
| Right superior temporal gyrus           | -0.023 | 0.109 | 0.831 | 0.932 | 298 | 387 |
| Left middle temporal gyrus              | -0.023 | 0.193 | 0.905 | 0.932 | 309 | 388 |
| Left rostral anterior cingulate cortex  | -0.021 | 0.130 | 0.871 | 0.932 | 316 | 394 |
| Right middle temporal gyrus             | -0.017 | 0.101 | 0.869 | 0.932 | 307 | 390 |
| Right supramarginal gyrus               | -0.016 | 0.078 | 0.840 | 0.932 | 303 | 386 |
| Left fusiform gyrus                     | -0.012 | 0.093 | 0.896 | 0.932 | 314 | 398 |
| Left lingual gyrus                      | -0.010 | 0.076 | 0.891 | 0.932 | 321 | 402 |
| Right temporal pole                     | -0.001 | 0.076 | 0.994 | 0.994 | 322 | 397 |
| Right pars opercularis                  | 0.005  | 0.076 | 0.945 | 0.958 | 316 | 399 |
| Left entorhinal cortex                  | 0.010  | 0.080 | 0.901 | 0.932 | 287 | 369 |
| Right rostral anterior cingulate cortex | 0.012  | 0.077 | 0.872 | 0.932 | 310 | 397 |
| Right caudal middle frontal gyrus       | 0.014  | 0.118 | 0.904 | 0.932 | 318 | 398 |
| Right precuneus                         | 0.019  | 0.102 | 0.855 | 0.932 | 324 | 399 |
| Left caudal middle frontal gyrus        | 0.024  | 0.160 | 0.882 | 0.932 | 321 | 404 |
| Left parahippocampal gyrus              | 0.025  | 0.120 | 0.833 | 0.932 | 317 | 394 |
| Left superior temporal gyrus            | 0.026  | 0.094 | 0.778 | 0.932 | 304 | 380 |



|                                        |       |       |       |       |     |     |
|----------------------------------------|-------|-------|-------|-------|-----|-----|
| Right banks superior temporal sulcus   | 0.026 | 0.079 | 0.738 | 0.932 | 298 | 383 |
| Right caudal anterior cingulate cortex | 0.030 | 0.091 | 0.738 | 0.932 | 310 | 400 |
| Left lateral occipital cortex          | 0.034 | 0.082 | 0.676 | 0.932 | 319 | 401 |
| Left supramarginal gyrus               | 0.042 | 0.098 | 0.670 | 0.932 | 299 | 382 |
| Left transverse temporal gyrus         | 0.042 | 0.087 | 0.625 | 0.932 | 322 | 403 |
| Left pars triangularis                 | 0.051 | 0.076 | 0.504 | 0.932 | 321 | 402 |
| Right inferior temporal cortex gyrus   | 0.053 | 0.134 | 0.695 | 0.932 | 320 | 394 |
| Right precentral gyrus                 | 0.053 | 0.113 | 0.639 | 0.932 | 312 | 394 |
| Left precentral gyrus                  | 0.062 | 0.085 | 0.462 | 0.932 | 313 | 396 |
| Right isthmus cingulate cortex         | 0.074 | 0.099 | 0.458 | 0.932 | 322 | 398 |
| Right transverse temporal gyrus        | 0.089 | 0.109 | 0.414 | 0.932 | 320 | 405 |
| Left inferior temporal cortex gyrus    | 0.091 | 0.171 | 0.596 | 0.932 | 315 | 397 |
| Left temporal pole                     | 0.111 | 0.076 | 0.144 | 0.860 | 321 | 398 |
| Right frontal pole                     | 0.131 | 0.109 | 0.226 | 0.860 | 319 | 405 |
| Right entorhinal cortex                | 0.148 | 0.130 | 0.256 | 0.860 | 276 | 348 |
| Left isthmus cingulate cortex          | 0.149 | 0.076 | 0.051 | 0.792 | 322 | 399 |

**TABLE S33a:** Full results from the moderator analyses in the adult samples of mean age and field strength of scanner on cortical thickness controlled for age, sex, and scan center.

|                                      | Cohen's d<br>(Field Strength) | Standard error | P-value | FDR P-value | Cohen's d<br>(Mean age) | Standard error | P-value | FDR P-value |
|--------------------------------------|-------------------------------|----------------|---------|-------------|-------------------------|----------------|---------|-------------|
| Right middle temporal gyrus          | -0.224                        | 0.121          | 0.063   | 0.924       | -0.011                  | 0.015          | 0.485   | 0.986       |
| Left middle temporal gyrus           | -0.203                        | 0.113          | 0.072   | 0.924       | -0.007                  | 0.014          | 0.642   | 0.986       |
| Right banks superior temporal sulcus | -0.193                        | 0.092          | 0.036   | 0.924       | -0.003                  | 0.013          | 0.811   | 0.986       |
| Left isthmus cingulate cortex        | -0.144                        | 0.101          | 0.155   | 0.924       | -0.003                  | 0.013          | 0.842   | 0.986       |
| Right lateral orbitofrontal cortex   | -0.140                        | 0.091          | 0.124   | 0.924       | -0.014                  | 0.011          | 0.191   | 0.986       |
| Right supramarginal gyrus            | -0.139                        | 0.123          | 0.261   | 0.924       | 0.004                   | 0.015          | 0.812   | 0.986       |
| Left banks superior temporal sulcus  | -0.136                        | 0.087          | 0.118   | 0.924       | -0.008                  | 0.010          | 0.435   | 0.986       |
| Right superior temporal gyrus        | -0.102                        | 0.081          | 0.205   | 0.924       | 0.001                   | 0.010          | 0.933   | 0.986       |
| Left lateral occipital cortex        | -0.100                        | 0.097          | 0.302   | 0.924       | -0.008                  | 0.012          | 0.517   | 0.986       |
| Right superior parietal cortex       | -0.097                        | 0.115          | 0.399   | 0.924       | 0.002                   | 0.014          | 0.879   | 0.986       |
| Right hemisphere average thickness   | -0.095                        | 0.117          | 0.413   | 0.924       | -0.007                  | 0.014          | 0.602   | 0.986       |
| Left rostral middle frontal gyrus    | -0.092                        | 0.099          | 0.351   | 0.924       | 0.001                   | 0.012          | 0.902   | 0.986       |
| Left frontal pole                    | -0.087                        | 0.094          | 0.358   | 0.924       | -0.017                  | 0.011          | 0.107   | 0.986       |
| Left cuneus                          | -0.082                        | 0.103          | 0.425   | 0.924       | 0.008                   | 0.012          | 0.528   | 0.986       |
| Right parahippocampal gyrus          | -0.082                        | 0.115          | 0.475   | 0.924       | -0.010                  | 0.014          | 0.469   | 0.986       |
| Right pars opercularis               | -0.077                        | 0.101          | 0.448   | 0.924       | 0.001                   | 0.012          | 0.931   | 0.986       |
| Left superior frontal gyrus          | -0.075                        | 0.117          | 0.521   | 0.924       | -0.009                  | 0.014          | 0.526   | 0.986       |
| Right pars triangularis              | -0.074                        | 0.107          | 0.487   | 0.924       | 0.003                   | 0.013          | 0.825   | 0.986       |
| Right rostral middle frontal gyrus   | -0.074                        | 0.100          | 0.464   | 0.924       | -0.006                  | 0.012          | 0.632   | 0.986       |
| Left precuneus                       | -0.072                        | 0.113          | 0.521   | 0.924       | 0.002                   | 0.014          | 0.907   | 0.986       |
| Right posterior cingulate cortex     | -0.068                        | 0.099          | 0.488   | 0.924       | -0.007                  | 0.012          | 0.526   | 0.986       |
| Right superior frontal gyrus         | -0.068                        | 0.116          | 0.556   | 0.924       | -0.004                  | 0.014          | 0.751   | 0.986       |
| Right caudal middle frontal gyrus    | -0.066                        | 0.103          | 0.524   | 0.924       | -0.009                  | 0.012          | 0.475   | 0.986       |
| Right insula                         | -0.064                        | 0.101          | 0.525   | 0.924       | 0.008                   | 0.012          | 0.510   | 0.986       |

|                                        |        |       |       |       |        |       |       |       |
|----------------------------------------|--------|-------|-------|-------|--------|-------|-------|-------|
| Left inferior parietal cortex          | -0.059 | 0.111 | 0.597 | 0.924 | 0.011  | 0.013 | 0.412 | 0.986 |
| Left hemisphere average thickness      | -0.059 | 0.111 | 0.594 | 0.924 | -0.005 | 0.013 | 0.708 | 0.986 |
| Left lateral orbitofrontal cortex      | -0.054 | 0.104 | 0.606 | 0.924 | -0.006 | 0.012 | 0.655 | 0.986 |
| Left pars orbitalis                    | -0.053 | 0.083 | 0.524 | 0.924 | -0.006 | 0.010 | 0.538 | 0.986 |
| Left precentral gyrus                  | -0.053 | 0.096 | 0.578 | 0.924 | 0.000  | 0.011 | 0.986 | 0.986 |
| Right precuneus                        | -0.050 | 0.119 | 0.673 | 0.924 | -0.013 | 0.014 | 0.351 | 0.986 |
| Left supramarginal gyrus               | -0.049 | 0.109 | 0.657 | 0.924 | -0.002 | 0.013 | 0.876 | 0.986 |
| Left fusiform gyrus                    | -0.042 | 0.116 | 0.718 | 0.924 | -0.026 | 0.013 | 0.046 | 0.810 |
| Left inferior temporal gyrus           | -0.042 | 0.096 | 0.663 | 0.924 | -0.022 | 0.010 | 0.036 | 0.810 |
| Right medial orbitofrontal cortex      | -0.042 | 0.093 | 0.647 | 0.924 | -0.013 | 0.011 | 0.237 | 0.986 |
| Right precentral gyrus                 | -0.042 | 0.119 | 0.723 | 0.924 | -0.003 | 0.014 | 0.848 | 0.986 |
| Left paracentral gyrus                 | -0.038 | 0.113 | 0.735 | 0.924 | 0.008  | 0.013 | 0.551 | 0.986 |
| Right inferior parietal cortex         | -0.035 | 0.097 | 0.717 | 0.924 | 0.000  | 0.012 | 0.976 | 0.986 |
| Right isthmus cingulate cortex         | -0.033 | 0.110 | 0.768 | 0.924 | -0.013 | 0.013 | 0.302 | 0.986 |
| Left pars triangularis                 | -0.027 | 0.090 | 0.764 | 0.924 | -0.001 | 0.011 | 0.893 | 0.986 |
| Right paracentral gyrus                | -0.027 | 0.089 | 0.760 | 0.924 | -0.006 | 0.010 | 0.599 | 0.986 |
| Right pars orbitalis                   | -0.023 | 0.091 | 0.801 | 0.924 | -0.006 | 0.011 | 0.584 | 0.986 |
| Left posterior cingulate cortex        | -0.021 | 0.091 | 0.821 | 0.924 | -0.004 | 0.011 | 0.703 | 0.986 |
| Right lateral occipital cortex         | -0.020 | 0.089 | 0.819 | 0.924 | -0.002 | 0.011 | 0.855 | 0.986 |
| Left medial orbitofrontal cortex       | -0.018 | 0.095 | 0.846 | 0.924 | -0.018 | 0.011 | 0.089 | 0.986 |
| Left superior temporal gyrus           | -0.018 | 0.104 | 0.864 | 0.924 | 0.003  | 0.012 | 0.798 | 0.986 |
| Left insula                            | -0.015 | 0.097 | 0.878 | 0.924 | 0.008  | 0.011 | 0.475 | 0.986 |
| Right entorhinal cortex                | -0.013 | 0.106 | 0.906 | 0.924 | -0.011 | 0.012 | 0.361 | 0.986 |
| Left pars opercularis                  | -0.003 | 0.091 | 0.970 | 0.970 | -0.008 | 0.011 | 0.442 | 0.986 |
| Right transverse temporal cortex       | 0.009  | 0.078 | 0.911 | 0.924 | 0.001  | 0.009 | 0.940 | 0.986 |
| Left postcentral gyrus                 | 0.014  | 0.105 | 0.894 | 0.924 | 0.010  | 0.013 | 0.429 | 0.986 |
| Right caudal anterior cingulate cortex | 0.015  | 0.093 | 0.872 | 0.924 | 0.015  | 0.011 | 0.166 | 0.986 |
| Left entorhinal cortex                 | 0.018  | 0.111 | 0.869 | 0.924 | -0.009 | 0.013 | 0.482 | 0.986 |

|                                         |       |       |       |       |        |       |       |       |
|-----------------------------------------|-------|-------|-------|-------|--------|-------|-------|-------|
| Right frontal pole                      | 0.025 | 0.078 | 0.745 | 0.924 | -0.011 | 0.009 | 0.237 | 0.986 |
| Right fusiform gyrus                    | 0.027 | 0.113 | 0.813 | 0.924 | -0.030 | 0.012 | 0.011 | 0.744 |
| Right pericalcarine cortex              | 0.032 | 0.100 | 0.751 | 0.924 | 0.010  | 0.012 | 0.412 | 0.986 |
| Left superior parietal cortex           | 0.035 | 0.128 | 0.784 | 0.924 | -0.001 | 0.015 | 0.958 | 0.986 |
| Left lingual gyrus                      | 0.036 | 0.098 | 0.711 | 0.924 | -0.011 | 0.012 | 0.353 | 0.986 |
| Right inferior temporal gyrus           | 0.037 | 0.085 | 0.666 | 0.924 | -0.012 | 0.010 | 0.191 | 0.986 |
| Left temporal pole                      | 0.040 | 0.078 | 0.610 | 0.924 | -0.022 | 0.009 | 0.022 | 0.785 |
| Left transverse temporal cortex         | 0.043 | 0.095 | 0.654 | 0.924 | 0.008  | 0.011 | 0.484 | 0.986 |
| Right lingual gyrus                     | 0.043 | 0.099 | 0.663 | 0.924 | 0.000  | 0.012 | 0.982 | 0.986 |
| Right postcentral gyrus                 | 0.047 | 0.130 | 0.719 | 0.924 | 0.000  | 0.016 | 0.980 | 0.986 |
| Left parahippocampal gyrus              | 0.053 | 0.093 | 0.566 | 0.924 | 0.006  | 0.011 | 0.616 | 0.986 |
| Right rostral anterior cingulate cortex | 0.055 | 0.090 | 0.544 | 0.924 | 0.004  | 0.011 | 0.731 | 0.986 |
| Left caudal middle frontal gyrus        | 0.056 | 0.092 | 0.541 | 0.924 | -0.009 | 0.011 | 0.440 | 0.986 |
| Right cuneus                            | 0.066 | 0.090 | 0.466 | 0.924 | 0.014  | 0.011 | 0.208 | 0.986 |
| Left rostral anterior cingulate cortex  | 0.067 | 0.079 | 0.392 | 0.924 | 0.008  | 0.010 | 0.424 | 0.986 |
| Right temporal pole                     | 0.068 | 0.080 | 0.397 | 0.924 | -0.015 | 0.010 | 0.120 | 0.986 |
| Left pericalcarine cortex               | 0.099 | 0.101 | 0.327 | 0.924 | -0.005 | 0.013 | 0.707 | 0.986 |
| Left caudal anterior cingulate cortex   | 0.131 | 0.078 | 0.094 | 0.924 | 0.011  | 0.009 | 0.247 | 0.986 |

**TABLE S33b:** Full results from the moderator analyses in the adult samples of mean age and field strength of scanner on surface area controlled for age, sex, scan center, and ICV.

|                                         | Cohen's d<br>(Field Strength) | Standard error | P-value | FDR P-value | Cohen's d<br>(Mean age) | Standard error | P-value | FDR P-value |
|-----------------------------------------|-------------------------------|----------------|---------|-------------|-------------------------|----------------|---------|-------------|
| Right posterior cingulate cortex        | -0.216                        | 0.127          | 0.089   | 0.568       | 0.018                   | 0.015          | 0.235   | 0.922       |
| Left posterior cingulate cortex         | -0.184                        | 0.101          | 0.070   | 0.568       | -0.005                  | 0.013          | 0.702   | 0.922       |
| Right pars triangularis                 | -0.101                        | 0.094          | 0.279   | 0.839       | 0.018                   | 0.011          | 0.105   | 0.922       |
| Right paracentral gyrus                 | -0.096                        | 0.078          | 0.216   | 0.797       | 0.007                   | 0.009          | 0.443   | 0.922       |
| Right entorhinal cortex                 | -0.092                        | 0.118          | 0.436   | 0.985       | 0.006                   | 0.014          | 0.697   | 0.922       |
| Left superior temporal gyrus            | -0.086                        | 0.082          | 0.296   | 0.839       | 0.006                   | 0.010          | 0.543   | 0.922       |
| Right pars opercularis                  | -0.083                        | 0.078          | 0.287   | 0.839       | 0.005                   | 0.010          | 0.591   | 0.922       |
| Right caudal anterior cingulate cortex  | -0.061                        | 0.116          | 0.602   | 0.993       | 0.024                   | 0.013          | 0.057   | 0.922       |
| Left entorhinal cortex                  | -0.059                        | 0.108          | 0.584   | 0.993       | 0.007                   | 0.013          | 0.556   | 0.922       |
| Left superior frontal gyrus             | -0.056                        | 0.080          | 0.484   | 0.993       | 0.013                   | 0.010          | 0.182   | 0.922       |
| Right cuneus                            | -0.049                        | 0.109          | 0.650   | 0.993       | 0.004                   | 0.013          | 0.750   | 0.922       |
| Right insula                            | -0.049                        | 0.092          | 0.598   | 0.993       | 0.014                   | 0.011          | 0.171   | 0.922       |
| Left parahippocampal gyrus              | -0.038                        | 0.078          | 0.631   | 0.993       | -0.001                  | 0.009          | 0.951   | 0.975       |
| Right superior parietal cortex          | -0.035                        | 0.103          | 0.731   | 0.993       | 0.004                   | 0.012          | 0.740   | 0.922       |
| Right temporal pole                     | -0.035                        | 0.110          | 0.749   | 0.993       | -0.002                  | 0.013          | 0.887   | 0.963       |
| Left inferior parietal cortex           | -0.034                        | 0.107          | 0.754   | 0.993       | -0.008                  | 0.013          | 0.546   | 0.922       |
| Left insula                             | -0.034                        | 0.099          | 0.730   | 0.993       | 0.007                   | 0.012          | 0.578   | 0.922       |
| Left fusiform gyrus                     | -0.029                        | 0.079          | 0.717   | 0.993       | 0.000                   | 0.010          | 0.962   | 0.975       |
| Right precuneus                         | -0.021                        | 0.119          | 0.860   | 0.993       | 0.000                   | 0.014          | 0.974   | 0.975       |
| Right rostral anterior cingulate cortex | -0.021                        | 0.097          | 0.829   | 0.993       | 0.019                   | 0.011          | 0.087   | 0.922       |
| Left transverse temporal cortex         | -0.017                        | 0.078          | 0.823   | 0.993       | -0.012                  | 0.009          | 0.204   | 0.922       |
| Left precuneus                          | -0.016                        | 0.092          | 0.865   | 0.993       | 0.008                   | 0.011          | 0.456   | 0.922       |
| Right superior frontal gyrus            | -0.015                        | 0.085          | 0.863   | 0.993       | 0.005                   | 0.010          | 0.647   | 0.922       |
| Right supramarginal gyrus               | -0.014                        | 0.100          | 0.890   | 0.993       | -0.005                  | 0.012          | 0.648   | 0.922       |
| Left superior parietal cortex           | -0.008                        | 0.104          | 0.937   | 0.993       | 0.010                   | 0.013          | 0.439   | 0.922       |

|                                        |        |       |       |       |        |       |       |       |
|----------------------------------------|--------|-------|-------|-------|--------|-------|-------|-------|
| Left medial orbitofrontal cortex       | -0.005 | 0.078 | 0.947 | 0.993 | 0.006  | 0.009 | 0.497 | 0.922 |
| Left pars opercularis                  | 0.001  | 0.081 | 0.990 | 0.993 | -0.007 | 0.010 | 0.500 | 0.922 |
| Right middle temporal gyrus            | 0.001  | 0.079 | 0.993 | 0.993 | -0.001 | 0.010 | 0.883 | 0.963 |
| Left caudal middle frontal gyrus       | 0.003  | 0.093 | 0.978 | 0.993 | -0.007 | 0.011 | 0.530 | 0.922 |
| Left temporal pole                     | 0.003  | 0.078 | 0.968 | 0.993 | 0.002  | 0.009 | 0.847 | 0.956 |
| Left pars triangularis                 | 0.004  | 0.078 | 0.954 | 0.993 | 0.002  | 0.009 | 0.842 | 0.956 |
| Right banks superior temporal sulcus   | 0.006  | 0.081 | 0.944 | 0.993 | -0.010 | 0.010 | 0.311 | 0.922 |
| Right medial orbitofrontal cortex      | 0.020  | 0.078 | 0.797 | 0.993 | 0.021  | 0.009 | 0.025 | 0.922 |
| Right frontal pole                     | 0.020  | 0.078 | 0.796 | 0.993 | -0.009 | 0.009 | 0.344 | 0.922 |
| Right superior temporal gyrus          | 0.026  | 0.081 | 0.746 | 0.993 | 0.007  | 0.010 | 0.510 | 0.922 |
| Left lingual gyrus                     | 0.028  | 0.101 | 0.782 | 0.993 | -0.005 | 0.012 | 0.673 | 0.922 |
| Right isthmus cingulate cortex         | 0.035  | 0.084 | 0.677 | 0.993 | -0.004 | 0.010 | 0.727 | 0.922 |
| Right transverse temporal cortex       | 0.035  | 0.078 | 0.651 | 0.993 | -0.010 | 0.009 | 0.286 | 0.922 |
| Left isthmus cingulate cortex          | 0.038  | 0.098 | 0.696 | 0.993 | 0.004  | 0.012 | 0.702 | 0.922 |
| Right pars orbitalis                   | 0.047  | 0.105 | 0.658 | 0.993 | -0.007 | 0.012 | 0.569 | 0.922 |
| Right hemisphere total surface area    | 0.048  | 0.078 | 0.540 | 0.993 | 0.009  | 0.009 | 0.363 | 0.922 |
| Right fusiform gyrus                   | 0.051  | 0.115 | 0.655 | 0.993 | 0.012  | 0.014 | 0.371 | 0.922 |
| Right precentral gyrus                 | 0.051  | 0.079 | 0.523 | 0.993 | -0.011 | 0.010 | 0.247 | 0.922 |
| Left paracentral gyrus                 | 0.057  | 0.092 | 0.538 | 0.993 | 0.004  | 0.011 | 0.727 | 0.922 |
| Left rostral anterior cingulate cortex | 0.070  | 0.109 | 0.524 | 0.993 | 0.011  | 0.013 | 0.416 | 0.922 |
| Left hemisphere total surface area     | 0.073  | 0.078 | 0.350 | 0.845 | 0.008  | 0.009 | 0.420 | 0.922 |
| Left supramarginal gyrus               | 0.075  | 0.082 | 0.361 | 0.845 | 0.003  | 0.010 | 0.738 | 0.922 |
| Right lateral orbitofrontal cortex     | 0.075  | 0.078 | 0.336 | 0.845 | 0.008  | 0.009 | 0.419 | 0.922 |
| Right parahippocampal gyrus            | 0.079  | 0.107 | 0.457 | 0.993 | 0.016  | 0.013 | 0.196 | 0.922 |
| Left pericalcarine cortex              | 0.080  | 0.078 | 0.309 | 0.839 | 0.014  | 0.010 | 0.157 | 0.922 |
| Right lingual gyrus                    | 0.081  | 0.078 | 0.302 | 0.839 | 0.017  | 0.009 | 0.067 | 0.922 |
| Left cuneus                            | 0.086  | 0.085 | 0.312 | 0.839 | 0.005  | 0.011 | 0.636 | 0.922 |
| Right inferior parietal cortex         | 0.091  | 0.100 | 0.362 | 0.845 | 0.005  | 0.012 | 0.682 | 0.922 |
| Right caudal middle frontal gyrus      | 0.095  | 0.087 | 0.276 | 0.839 | -0.007 | 0.011 | 0.495 | 0.922 |

|                                              |       |       |       |       |        |       |       |       |
|----------------------------------------------|-------|-------|-------|-------|--------|-------|-------|-------|
| <b>Left pars orbitalis</b>                   | 0.107 | 0.078 | 0.171 | 0.746 | -0.003 | 0.009 | 0.790 | 0.954 |
| <b>Right rostral middle frontal gyrus</b>    | 0.113 | 0.085 | 0.181 | 0.746 | 0.001  | 0.011 | 0.897 | 0.963 |
| <b>Left postcentral gyrus</b>                | 0.115 | 0.079 | 0.144 | 0.721 | 0.005  | 0.010 | 0.585 | 0.922 |
| <b>Right postcentral gyrus</b>               | 0.115 | 0.089 | 0.198 | 0.770 | 0.003  | 0.011 | 0.808 | 0.956 |
| <b>Right lateral occipital cortex</b>        | 0.116 | 0.079 | 0.141 | 0.721 | 0.000  | 0.009 | 0.975 | 0.975 |
| <b>Left lateral orbitofrontal cortex</b>     | 0.127 | 0.093 | 0.174 | 0.746 | 0.012  | 0.012 | 0.315 | 0.922 |
| <b>Right pericalcarine cortex</b>            | 0.135 | 0.078 | 0.085 | 0.568 | 0.006  | 0.009 | 0.556 | 0.922 |
| <b>Left middle temporal gyrus</b>            | 0.139 | 0.082 | 0.089 | 0.568 | 0.007  | 0.010 | 0.444 | 0.922 |
| <b>Left inferior temporal gyrus</b>          | 0.145 | 0.079 | 0.066 | 0.568 | 0.002  | 0.010 | 0.846 | 0.956 |
| <b>Left precentral gyrus</b>                 | 0.146 | 0.079 | 0.062 | 0.568 | -0.010 | 0.010 | 0.272 | 0.922 |
| <b>Right inferior temporal gyrus</b>         | 0.147 | 0.078 | 0.060 | 0.568 | -0.010 | 0.010 | 0.302 | 0.922 |
| <b>Left rostral middle frontal gyrus</b>     | 0.150 | 0.088 | 0.088 | 0.568 | 0.001  | 0.011 | 0.908 | 0.963 |
| <b>Left banks superior temporal sulcus</b>   | 0.151 | 0.083 | 0.068 | 0.568 | 0.005  | 0.010 | 0.609 | 0.922 |
| <b>Left frontal pole</b>                     | 0.164 | 0.101 | 0.104 | 0.609 | -0.004 | 0.013 | 0.750 | 0.922 |
| <b>Left caudal anterior cingulate cortex</b> | 0.166 | 0.079 | 0.034 | 0.568 | 0.011  | 0.010 | 0.312 | 0.922 |
| <b>Left lateral occipital cortex</b>         | 0.246 | 0.092 | 0.007 | 0.510 | -0.008 | 0.013 | 0.518 | 0.922 |

**TABLE S34a:** Full results from the moderator analyses in the pediatric samples of mean age and field strength of scanner on cortical thickness controlled for age, gender, scan center and ICV.

|                                       | <b>Cohen's d<br/>(Field Strength)</b> | <b>Standard error</b> | <b>P-value</b> | <b>FDR P-value</b> | <b>Cohen's d<br/>(Mean age)</b> | <b>Standard error</b> | <b>P-value</b> | <b>FDR P-value</b> |
|---------------------------------------|---------------------------------------|-----------------------|----------------|--------------------|---------------------------------|-----------------------|----------------|--------------------|
| Left caudal middle frontal gyrus      | -0.634                                | 0.314                 | 0.043          | 0.666              | -0.119                          | 0.108                 | 0.271          | 0.499              |
| Right lateral occipital cortex        | -0.609                                | 0.322                 | 0.058          | 0.666              | -0.322                          | 0.076                 | 0.000          | 0.001              |
| Left isthmus cingulate cortex         | -0.581                                | 0.266                 | 0.029          | 0.666              | -0.158                          | 0.087                 | 0.070          | 0.376              |
| Left inferior parietal cortex         | -0.574                                | 0.385                 | 0.136          | 0.666              | -0.153                          | 0.120                 | 0.202          | 0.492              |
| Right caudal middle frontal gyrus     | -0.543                                | 0.269                 | 0.044          | 0.666              | -0.139                          | 0.087                 | 0.110          | 0.425              |
| Left paracentral gyrus                | -0.513                                | 0.313                 | 0.101          | 0.666              | -0.188                          | 0.093                 | 0.043          | 0.338              |
| Right precuneus                       | -0.506                                | 0.339                 | 0.135          | 0.666              | -0.261                          | 0.087                 | 0.003          | 0.097              |
| Left superior frontal gyrus           | -0.463                                | 0.240                 | 0.054          | 0.666              | -0.093                          | 0.075                 | 0.219          | 0.494              |
| Left transverse temporal cortex       | -0.439                                | 0.292                 | 0.133          | 0.666              | -0.137                          | 0.089                 | 0.123          | 0.425              |
| Left postcentral gyrus                | -0.435                                | 0.293                 | 0.139          | 0.666              | -0.213                          | 0.081                 | 0.008          | 0.145              |
| Left precuneus                        | -0.428                                | 0.390                 | 0.273          | 0.708              | -0.206                          | 0.112                 | 0.066          | 0.376              |
| Left supramarginal gyrus              | -0.422                                | 0.339                 | 0.214          | 0.708              | -0.041                          | 0.110                 | 0.712          | 0.804              |
| Right inferior parietal cortex        | -0.421                                | 0.476                 | 0.376          | 0.838              | -0.145                          | 0.145                 | 0.315          | 0.525              |
| Right isthmus cingulate cortex        | -0.400                                | 0.237                 | 0.091          | 0.666              | -0.111                          | 0.075                 | 0.142          | 0.433              |
| Right superior frontal gyrus          | -0.386                                | 0.240                 | 0.108          | 0.666              | -0.107                          | 0.077                 | 0.164          | 0.448              |
| Right parahippocampal gyrus           | -0.369                                | 0.234                 | 0.114          | 0.666              | -0.113                          | 0.074                 | 0.128          | 0.425              |
| Left precentral gyrus                 | -0.365                                | 0.318                 | 0.251          | 0.708              | -0.167                          | 0.090                 | 0.064          | 0.376              |
| Left pars orbitalis                   | -0.342                                | 0.234                 | 0.143          | 0.666              | -0.045                          | 0.074                 | 0.540          | 0.738              |
| Right paracentral gyrus               | -0.323                                | 0.266                 | 0.224          | 0.708              | -0.166                          | 0.077                 | 0.033          | 0.338              |
| Right superior temporal gyrus         | -0.289                                | 0.332                 | 0.384          | 0.838              | -0.161                          | 0.095                 | 0.091          | 0.425              |
| Left caudal anterior cingulate cortex | -0.284                                | 0.242                 | 0.242          | 0.708              | -0.074                          | 0.075                 | 0.325          | 0.529              |
| Left banks superior temporal sulcus   | -0.281                                | 0.273                 | 0.304          | 0.759              | -0.081                          | 0.080                 | 0.313          | 0.525              |
| Right hemisphere average thickness    | -0.272                                | 0.326                 | 0.405          | 0.838              | -0.186                          | 0.088                 | 0.034          | 0.338              |
| Right supramarginal gyrus             | -0.263                                | 0.358                 | 0.463          | 0.838              | -0.169                          | 0.102                 | 0.098          | 0.425              |
| Right pars orbitalis                  | -0.262                                | 0.237                 | 0.270          | 0.708              | -0.003                          | 0.077                 | 0.968          | 0.968              |



|                                        |        |       |       |       |        |       |       |       |
|----------------------------------------|--------|-------|-------|-------|--------|-------|-------|-------|
| Right pars triangularis                | -0.217 | 0.260 | 0.403 | 0.838 | -0.151 | 0.076 | 0.046 | 0.338 |
| Right rostral middle frontal gyrus     | -0.216 | 0.243 | 0.374 | 0.838 | -0.042 | 0.077 | 0.579 | 0.738 |
| Right precentral gyrus                 | -0.210 | 0.354 | 0.553 | 0.916 | -0.224 | 0.084 | 0.007 | 0.145 |
| Right banks superior temporal sulcus   | -0.205 | 0.281 | 0.467 | 0.838 | -0.087 | 0.085 | 0.308 | 0.525 |
| Left hemisphere average thickness      | -0.197 | 0.347 | 0.570 | 0.916 | -0.128 | 0.101 | 0.206 | 0.492 |
| Left lingual gyrus                     | -0.184 | 0.237 | 0.437 | 0.838 | -0.116 | 0.075 | 0.122 | 0.425 |
| Left pars triangularis                 | -0.181 | 0.239 | 0.449 | 0.838 | -0.076 | 0.076 | 0.313 | 0.525 |
| Right superior parietal cortex         | -0.164 | 0.379 | 0.665 | 0.916 | -0.126 | 0.112 | 0.259 | 0.499 |
| Right lingual gyrus                    | -0.148 | 0.286 | 0.605 | 0.916 | -0.075 | 0.087 | 0.390 | 0.620 |
| Right pericalcarine cortex             | -0.138 | 0.265 | 0.603 | 0.916 | -0.148 | 0.075 | 0.048 | 0.338 |
| Left parahippocampal gyrus             | -0.116 | 0.265 | 0.661 | 0.916 | -0.090 | 0.079 | 0.257 | 0.499 |
| Left posterior cingulate cortex        | -0.112 | 0.323 | 0.729 | 0.923 | -0.064 | 0.099 | 0.515 | 0.738 |
| Left superior temporal gyrus           | -0.109 | 0.276 | 0.693 | 0.916 | -0.091 | 0.082 | 0.268 | 0.499 |
| Right postcentral gyrus                | -0.105 | 0.251 | 0.674 | 0.916 | -0.128 | 0.079 | 0.108 | 0.425 |
| Left fusiform gyrus                    | -0.104 | 0.343 | 0.762 | 0.923 | -0.120 | 0.099 | 0.226 | 0.495 |
| Left rostral anterior cingulate cortex | -0.104 | 0.239 | 0.664 | 0.916 | -0.086 | 0.076 | 0.260 | 0.499 |
| Right posterior cingulate cortex       | -0.102 | 0.342 | 0.765 | 0.923 | -0.137 | 0.097 | 0.160 | 0.448 |
| Right pars opercularis                 | -0.096 | 0.238 | 0.687 | 0.916 | -0.095 | 0.076 | 0.211 | 0.492 |
| Left lateral orbitofrontal cortex      | -0.076 | 0.231 | 0.742 | 0.923 | -0.058 | 0.073 | 0.429 | 0.653 |
| Left rostral middle frontal gyrus      | -0.034 | 0.236 | 0.886 | 0.968 | -0.031 | 0.075 | 0.675 | 0.801 |
| Right caudal anterior cingulate cortex | -0.034 | 0.313 | 0.913 | 0.968 | -0.021 | 0.098 | 0.832 | 0.885 |
| Right lateral orbitofrontal cortex     | -0.031 | 0.231 | 0.895 | 0.968 | 0.005  | 0.074 | 0.943 | 0.957 |
| Left insula                            | -0.012 | 0.295 | 0.968 | 0.982 | -0.099 | 0.087 | 0.253 | 0.499 |
| Right entorhinal cortex                | 0.003  | 0.291 | 0.993 | 0.993 | -0.058 | 0.091 | 0.524 | 0.738 |
| Right cuneus                           | 0.018  | 0.262 | 0.944 | 0.972 | -0.119 | 0.077 | 0.119 | 0.425 |
| Left lateral occipital cortex          | 0.033  | 0.284 | 0.908 | 0.968 | -0.178 | 0.075 | 0.017 | 0.242 |
| Left superior parietal cortex          | 0.033  | 0.455 | 0.942 | 0.972 | -0.067 | 0.138 | 0.627 | 0.773 |
| Right fusiform gyrus                   | 0.040  | 0.307 | 0.896 | 0.968 | -0.115 | 0.089 | 0.195 | 0.492 |
| Right transverse temporal cortex       | 0.042  | 0.258 | 0.872 | 0.968 | -0.029 | 0.080 | 0.717 | 0.804 |

|                                                |       |       |       |       |        |       |       |       |
|------------------------------------------------|-------|-------|-------|-------|--------|-------|-------|-------|
| <b>Left pericalcarine cortex</b>               | 0.054 | 0.237 | 0.821 | 0.958 | -0.034 | 0.075 | 0.647 | 0.781 |
| <b>Left entorhinal cortex</b>                  | 0.090 | 0.343 | 0.793 | 0.941 | -0.014 | 0.108 | 0.897 | 0.937 |
| <b>Right rostral anterior cingulate cortex</b> | 0.123 | 0.236 | 0.600 | 0.916 | -0.026 | 0.074 | 0.724 | 0.804 |
| <b>Right middle temporal gyrus</b>             | 0.143 | 0.381 | 0.708 | 0.918 | 0.012  | 0.119 | 0.921 | 0.948 |
| <b>Left pars opercularis</b>                   | 0.164 | 0.342 | 0.632 | 0.916 | -0.059 | 0.103 | 0.569 | 0.738 |
| <b>Left temporal pole</b>                      | 0.164 | 0.238 | 0.492 | 0.862 | -0.036 | 0.075 | 0.630 | 0.773 |
| <b>Right temporal pole</b>                     | 0.186 | 0.250 | 0.457 | 0.838 | -0.103 | 0.075 | 0.166 | 0.448 |
| <b>Left middle temporal gyrus</b>              | 0.213 | 0.402 | 0.596 | 0.916 | 0.036  | 0.127 | 0.775 | 0.847 |
| <b>Right inferior temporal gyrus</b>           | 0.216 | 0.262 | 0.411 | 0.838 | -0.047 | 0.076 | 0.538 | 0.738 |
| <b>Right insula</b>                            | 0.275 | 0.247 | 0.266 | 0.708 | -0.059 | 0.080 | 0.462 | 0.688 |
| <b>Right medial orbitofrontal cortex</b>       | 0.287 | 0.236 | 0.224 | 0.708 | -0.041 | 0.075 | 0.580 | 0.738 |
| <b>Left frontal pole</b>                       | 0.319 | 0.233 | 0.171 | 0.666 | 0.029  | 0.074 | 0.698 | 0.804 |
| <b>Right frontal pole</b>                      | 0.320 | 0.232 | 0.168 | 0.666 | 0.109  | 0.074 | 0.140 | 0.433 |
| <b>Left inferior temporal gyrus</b>            | 0.363 | 0.327 | 0.266 | 0.708 | 0.061  | 0.107 | 0.570 | 0.738 |
| <b>Left cuneus</b>                             | 0.377 | 0.272 | 0.165 | 0.666 | 0.071  | 0.089 | 0.426 | 0.653 |
| <b>Left medial orbitofrontal cortex</b>        | 0.400 | 0.240 | 0.096 | 0.666 | 0.017  | 0.080 | 0.835 | 0.885 |

**TABLE S34b:** Full results from the moderator analyses in the pediatric samples of mean age and field strength of scanner on surface area controlled for age, sex, scan center, and ICV.

|                                     | Cohen's d<br>(Field Strength) | Standard error | P-value | FDR P-value | Cohen's d<br>(Mean age) | Standard error | P-value | FDR P-value |
|-------------------------------------|-------------------------------|----------------|---------|-------------|-------------------------|----------------|---------|-------------|
| Left middle temporal gyrus          | -0.998                        | 0.440          | 0.023   | 0.600       | -0.128                  | 0.170          | 0.451   | 0.999       |
| Right inferior temporal gyrus       | -0.550                        | 0.329          | 0.094   | 0.907       | -0.138                  | 0.115          | 0.228   | 0.999       |
| Right pars opercularis              | -0.545                        | 0.242          | 0.024   | 0.600       | -0.078                  | 0.076          | 0.306   | 0.999       |
| Right pars orbitalis                | -0.531                        | 0.238          | 0.026   | 0.600       | -0.155                  | 0.075          | 0.038   | 0.999       |
| Left rostral middle frontal gyrus   | -0.508                        | 0.322          | 0.115   | 0.907       | -0.048                  | 0.109          | 0.660   | 0.999       |
| Left inferior temporal gyrus        | -0.506                        | 0.470          | 0.282   | 0.907       | -0.094                  | 0.154          | 0.540   | 0.999       |
| Right supramarginal gyrus           | -0.490                        | 0.257          | 0.057   | 0.907       | -0.107                  | 0.083          | 0.198   | 0.999       |
| Right superior parietal cortex      | -0.432                        | 0.303          | 0.153   | 0.907       | -0.030                  | 0.105          | 0.772   | 0.999       |
| Left pars triangularis              | -0.355                        | 0.240          | 0.138   | 0.907       | 0.010                   | 0.076          | 0.895   | 0.999       |
| Left superior parietal cortex       | -0.315                        | 0.262          | 0.229   | 0.907       | -0.010                  | 0.091          | 0.915   | 0.999       |
| Right entorhinal cortex             | -0.312                        | 0.342          | 0.362   | 0.907       | -0.089                  | 0.112          | 0.430   | 0.999       |
| Left precentral gyrus               | -0.306                        | 0.239          | 0.200   | 0.907       | -0.036                  | 0.082          | 0.665   | 0.999       |
| Right superior temporal gyrus       | -0.301                        | 0.337          | 0.372   | 0.907       | 0.025                   | 0.109          | 0.817   | 0.999       |
| Right pars triangularis             | -0.288                        | 0.253          | 0.255   | 0.907       | -0.075                  | 0.084          | 0.375   | 0.999       |
| Left insula                         | -0.286                        | 0.263          | 0.276   | 0.907       | 0.000                   | 0.085          | 0.999   | 0.999       |
| Right superior frontal gyrus        | -0.278                        | 0.331          | 0.401   | 0.907       | 0.050                   | 0.109          | 0.647   | 0.999       |
| Left hemisphere total surface area  | -0.278                        | 0.354          | 0.431   | 0.907       | -0.005                  | 0.116          | 0.967   | 0.999       |
| Right medial orbitofrontal cortex   | -0.274                        | 0.410          | 0.504   | 0.907       | 0.008                   | 0.131          | 0.948   | 0.999       |
| Left lateral orbitofrontal cortex   | -0.270                        | 0.233          | 0.245   | 0.907       | -0.075                  | 0.074          | 0.311   | 0.999       |
| Right hemisphere total surface area | -0.267                        | 0.293          | 0.363   | 0.907       | 0.027                   | 0.097          | 0.782   | 0.999       |
| Right rostral middle frontal gyrus  | -0.260                        | 0.294          | 0.377   | 0.907       | 0.041                   | 0.093          | 0.661   | 0.999       |
| Left banks superior temporal sulcus | -0.257                        | 0.289          | 0.374   | 0.907       | -0.027                  | 0.088          | 0.757   | 0.999       |
| Right cuneus                        | -0.250                        | 0.235          | 0.289   | 0.907       | -0.090                  | 0.075          | 0.228   | 0.999       |
| Right frontal pole                  | -0.243                        | 0.317          | 0.443   | 0.907       | 0.009                   | 0.103          | 0.934   | 0.999       |
| Left fusiform gyrus                 | -0.225                        | 0.260          | 0.387   | 0.907       | -0.069                  | 0.086          | 0.420   | 0.999       |

|                                         |        |       |       |       |        |       |       |       |
|-----------------------------------------|--------|-------|-------|-------|--------|-------|-------|-------|
| Right lateral orbitofrontal cortex      | -0.225 | 0.243 | 0.354 | 0.907 | -0.108 | 0.075 | 0.149 | 0.999 |
| Right insula                            | -0.206 | 0.247 | 0.404 | 0.907 | -0.084 | 0.078 | 0.283 | 0.999 |
| Left superior temporal gyrus            | -0.198 | 0.304 | 0.515 | 0.907 | -0.018 | 0.096 | 0.853 | 0.999 |
| Right caudal middle frontal gyrus       | -0.194 | 0.338 | 0.566 | 0.907 | -0.065 | 0.107 | 0.543 | 0.999 |
| Left supramarginal gyrus                | -0.183 | 0.331 | 0.580 | 0.907 | 0.044  | 0.102 | 0.667 | 0.999 |
| Right fusiform gyrus                    | -0.183 | 0.282 | 0.517 | 0.907 | 0.042  | 0.088 | 0.637 | 0.999 |
| Left superior frontal gyrus             | -0.161 | 0.334 | 0.630 | 0.907 | 0.004  | 0.106 | 0.969 | 0.999 |
| Right inferior parietal cortex          | -0.159 | 0.248 | 0.522 | 0.907 | -0.002 | 0.078 | 0.978 | 0.999 |
| Left entorhinal cortex                  | -0.157 | 0.244 | 0.519 | 0.907 | -0.009 | 0.081 | 0.910 | 0.999 |
| Left precuneus                          | -0.155 | 0.317 | 0.625 | 0.907 | 0.025  | 0.100 | 0.801 | 0.999 |
| Right precentral gyrus                  | -0.150 | 0.359 | 0.676 | 0.912 | 0.089  | 0.112 | 0.426 | 0.999 |
| Left pars opercularis                   | -0.145 | 0.364 | 0.691 | 0.912 | 0.078  | 0.113 | 0.489 | 0.999 |
| Right lingual gyrus                     | -0.144 | 0.242 | 0.551 | 0.907 | 0.121  | 0.073 | 0.100 | 0.999 |
| Right pericalcarine cortex              | -0.136 | 0.235 | 0.562 | 0.907 | 0.066  | 0.074 | 0.373 | 0.999 |
| Left cuneus                             | -0.120 | 0.237 | 0.614 | 0.907 | 0.049  | 0.075 | 0.516 | 0.999 |
| Right banks superior temporal sulcus    | -0.117 | 0.256 | 0.648 | 0.907 | 0.023  | 0.082 | 0.781 | 0.999 |
| Left parahippocampal gyrus              | -0.103 | 0.351 | 0.770 | 0.928 | 0.046  | 0.112 | 0.683 | 0.999 |
| Right lateral occipital cortex          | -0.095 | 0.264 | 0.719 | 0.928 | 0.030  | 0.084 | 0.719 | 0.999 |
| Left pericalcarine cortex               | -0.085 | 0.275 | 0.757 | 0.928 | 0.099  | 0.085 | 0.244 | 0.999 |
| Left caudal middle frontal gyrus        | -0.083 | 0.466 | 0.858 | 0.954 | -0.002 | 0.146 | 0.991 | 0.999 |
| Right middle temporal gyrus             | -0.061 | 0.314 | 0.846 | 0.954 | 0.002  | 0.101 | 0.982 | 0.999 |
| Left medial orbitofrontal cortex        | -0.056 | 0.249 | 0.823 | 0.954 | -0.096 | 0.077 | 0.216 | 0.999 |
| Left paracentral gyrus                  | -0.042 | 0.365 | 0.910 | 0.995 | -0.079 | 0.110 | 0.471 | 0.999 |
| Right rostral anterior cingulate cortex | -0.016 | 0.239 | 0.948 | 0.998 | 0.012  | 0.074 | 0.874 | 0.999 |
| Right postcentral gyrus                 | -0.012 | 0.250 | 0.961 | 0.998 | 0.053  | 0.079 | 0.503 | 0.999 |
| Right precuneus                         | -0.002 | 0.312 | 0.995 | 0.998 | 0.138  | 0.090 | 0.127 | 0.999 |
| Right transverse temporal cortex        | -0.001 | 0.330 | 0.998 | 0.998 | 0.016  | 0.104 | 0.875 | 0.999 |
| Left postcentral gyrus                  | 0.002  | 0.244 | 0.992 | 0.998 | 0.007  | 0.078 | 0.930 | 0.999 |
| Left lingual gyrus                      | 0.005  | 0.233 | 0.984 | 0.998 | 0.123  | 0.074 | 0.098 | 0.999 |

|                                               |       |       |       |       |        |       |       |       |
|-----------------------------------------------|-------|-------|-------|-------|--------|-------|-------|-------|
| <b>Right posterior cingulate cortex</b>       | 0.053 | 0.291 | 0.855 | 0.954 | -0.018 | 0.093 | 0.849 | 0.999 |
| <b>Left pars orbitalis</b>                    | 0.068 | 0.246 | 0.783 | 0.928 | -0.036 | 0.080 | 0.652 | 0.999 |
| <b>Left lateral occipital cortex</b>          | 0.078 | 0.267 | 0.771 | 0.928 | 0.165  | 0.075 | 0.027 | 0.999 |
| <b>Left caudal anterior cingulate cortex</b>  | 0.084 | 0.270 | 0.754 | 0.928 | -0.049 | 0.085 | 0.562 | 0.999 |
| <b>Left isthmus cingulate cortex</b>          | 0.094 | 0.234 | 0.688 | 0.912 | 0.098  | 0.074 | 0.187 | 0.999 |
| <b>Left transverse temporal cortex</b>        | 0.125 | 0.273 | 0.646 | 0.907 | 0.094  | 0.085 | 0.266 | 0.999 |
| <b>Left frontal pole</b>                      | 0.126 | 0.232 | 0.588 | 0.907 | 0.110  | 0.073 | 0.133 | 0.999 |
| <b>Right parahippocampal gyrus</b>            | 0.143 | 0.232 | 0.537 | 0.907 | 0.072  | 0.074 | 0.329 | 0.999 |
| <b>Right paracentral gyrus</b>                | 0.157 | 0.232 | 0.500 | 0.907 | -0.056 | 0.074 | 0.447 | 0.999 |
| <b>Right temporal pole</b>                    | 0.172 | 0.231 | 0.457 | 0.907 | 0.013  | 0.073 | 0.855 | 0.999 |
| <b>Left inferior parietal cortex</b>          | 0.199 | 0.323 | 0.538 | 0.907 | 0.070  | 0.097 | 0.472 | 0.999 |
| <b>Right isthmus cingulate cortex</b>         | 0.205 | 0.293 | 0.484 | 0.907 | 0.149  | 0.082 | 0.068 | 0.999 |
| <b>Left rostral anterior cingulate cortex</b> | 0.208 | 0.381 | 0.585 | 0.907 | 0.020  | 0.122 | 0.867 | 0.999 |
| <b>Right caudal anterior cingulate cortex</b> | 0.216 | 0.251 | 0.388 | 0.907 | 0.065  | 0.076 | 0.386 | 0.999 |
| <b>Left temporal pole</b>                     | 0.218 | 0.237 | 0.357 | 0.907 | 0.123  | 0.075 | 0.101 | 0.999 |
| <b>Left posterior cingulate cortex</b>        | 0.237 | 0.240 | 0.323 | 0.907 | 0.043  | 0.076 | 0.571 | 0.999 |

**TABLE S35:** Demographic and Clinical Characteristics of medicated and unmedicated OCD patients.

| Characteristic                                   | medicated adult<br>OCD patients<br>(N=646) |          | unmedicated adult<br>OCD patients<br>(N=831) |          | Statistical analysis |      |          | medicated pediatric<br>OCD patients<br>(N=183) |          | unmedicated pediatric<br>OCD patients<br>(N=222) |          | Statistical analysis |     |          |
|--------------------------------------------------|--------------------------------------------|----------|----------------------------------------------|----------|----------------------|------|----------|------------------------------------------------|----------|--------------------------------------------------|----------|----------------------|-----|----------|
|                                                  | Mean                                       | SD       | Mean                                         | SD       | t                    | df   | p        | Mean                                           | SD       | Mean                                             | SD       | t                    | df  | p        |
| <b>Age (years)</b>                               | 34.2                                       | 10.2     | 30.3                                         | 8.9      | -7.7                 | 1288 | < 0,001* | 14.6                                           | 2.3      | 13.2                                             | 2.6      | -5.8                 | 401 | < 0,001* |
| <b>OCD illness severity score</b>                | 24.9                                       | 7.3      | 24.1                                         | 6.5      | -2.0                 | 1243 | 0.041*   | 20.7                                           | 7.5      | 22.0                                             | 7.2      | 1.7                  | 400 | 0.089    |
| <b>Age at onset of clinical symptoms (years)</b> | 20.8                                       | 9.7      | 19.2                                         | 8.5      | -3.3                 | 1211 | 0.001*   | 10.8                                           | 3.2      | 10.2                                             | 3.0      | -1.5                 | 287 | 0.123    |
|                                                  | <b>N</b>                                   | <b>%</b> | <b>N</b>                                     | <b>%</b> | <b>X<sup>2</sup></b> |      | <b>p</b> | <b>N</b>                                       | <b>%</b> | <b>N</b>                                         | <b>%</b> | <b>X<sup>2</sup></b> |     | <b>p</b> |
| <b>Male</b>                                      | 320                                        | 49.5     | 424                                          | 51.0     | 0.3                  | 1    | 0.571    | 106                                            | 57.9     | 113                                              | 50.9     | 2.0                  | 1   | 0.158    |
| <b>Current Anxiety</b>                           | 104                                        | 17.9     | 119                                          | 16.1     | 0.8                  | 1    | 0.381    | 61                                             | 35.9     | 70                                               | 34.0     | 0.1                  | 1   | 0.700    |
| <b>Current Depression</b>                        | 98                                         | 16.6     | 65                                           | 8.7      | 19.3                 | 1    | < 0.001* | 10                                             | 5.9      | 19                                               | 9.2      | 1.4                  | 1   | 0.232    |

**TABLE S36a:** Full mega-analytic results for cortical thickness of each structure for the medicated OCD patients on antidepressants compared with adult healthy controls, controlling for age, sex and scan center.

|                                           | <b>Cohen's d (Antidep vs HC)</b> | <b>Standard Error</b> | <b>P-value</b> | <b>FDR P-value</b> | <b>N controls</b> | <b>N antidepressants</b> |
|-------------------------------------------|----------------------------------|-----------------------|----------------|--------------------|-------------------|--------------------------|
| <b>Left fusiform gyrus</b>                | -0.253                           | 0.009                 | 6.907E-06      | 4.835E-04          | 1428              | 416                      |
| <b>Left cortical thickness</b>            | -0.240                           | 0.006                 | 1.945E-05      | 5.654E-04          | 1435              | 418                      |
| <b>Left superior frontal gyrus</b>        | -0.233                           | 0.009                 | 4.379E-05      | 5.654E-04          | 1413              | 403                      |
| <b>Right middle temporal gyrus</b>        | -0.232                           | 0.010                 | 4.468E-05      | 5.654E-04          | 1402              | 407                      |
| <b>Right fusiform gyrus</b>               | -0.228                           | 0.009                 | 5.811E-05      | 5.654E-04          | 1428              | 408                      |
| <b>Right caudal middle frontal gyrus</b>  | -0.228                           | 0.009                 | 5.323E-05      | 5.654E-04          | 1423              | 415                      |
| <b>Right cortical thickness</b>           | -0.226                           | 0.006                 | 5.930E-05      | 5.654E-04          | 1435              | 416                      |
| <b>Right lateral orbitofrontal cortex</b> | -0.224                           | 0.010                 | 6.461E-05      | 5.654E-04          | 1431              | 418                      |
| <b>Left middle temporal gyrus</b>         | -0.223                           | 0.010                 | 1.457E-04      | 0.001              | 1320              | 384                      |
| <b>Right inferior parietal cortex</b>     | -0.218                           | 0.008                 | 1.390E-04      | 0.001              | 1379              | 404                      |
| <b>Left inferior temporal gyrus</b>       | -0.204                           | 0.010                 | 3.595E-04      | 0.002              | 1383              | 405                      |
| <b>Right inferior temporal gyrus</b>      | -0.193                           | 0.010                 | 6.397E-04      | 0.004              | 1400              | 415                      |
| <b>Left rostral middle frontal gyrus</b>  | -0.190                           | 0.008                 | 7.697E-04      | 0.004              | 1429              | 411                      |
| <b>Left inferior parietal cortex</b>      | -0.188                           | 0.008                 | 0.001          | 0.005              | 1364              | 404                      |
| <b>Left caudal middle frontal gyrus</b>   | -0.186                           | 0.009                 | 9.789E-04      | 0.005              | 1429              | 414                      |
| <b>Left lingual gyrus</b>                 | -0.184                           | 0.008                 | 0.001          | 0.005              | 1427              | 413                      |
| <b>Left pars opercularis</b>              | -0.183                           | 0.009                 | 0.001          | 0.005              | 1427              | 414                      |
| <b>Left lateral orbitofrontal cortex</b>  | -0.182                           | 0.010                 | 0.001          | 0.005              | 1433              | 414                      |
| <b>Left isthmus cingulate cortex</b>      | -0.182                           | 0.012                 | 0.001          | 0.005              | 1431              | 416                      |
| <b>Right superior frontal gyrus</b>       | -0.180                           | 0.009                 | 0.001          | 0.005              | 1410              | 413                      |
| <b>Right pars triangularis</b>            | -0.169                           | 0.010                 | 0.003          | 0.009              | 1423              | 408                      |
| <b>Right precuneus</b>                    | -0.169                           | 0.008                 | 0.003          | 0.009              | 1429              | 416                      |
| <b>Right rostral middle frontal gyrus</b> | -0.168                           | 0.008                 | 0.003          | 0.009              | 1424              | 417                      |
| <b>Right pars orbitalis</b>               | -0.163                           | 0.013                 | 0.004          | 0.011              | 1431              | 418                      |

|                                        |        |       |       |       |      |     |
|----------------------------------------|--------|-------|-------|-------|------|-----|
| Left insula                            | -0.163 | 0.011 | 0.004 | 0.011 | 1414 | 410 |
| Right medial orbitofrontal cortex      | -0.162 | 0.011 | 0.004 | 0.011 | 1428 | 414 |
| Left parahippocampal gyrus             | -0.160 | 0.018 | 0.004 | 0.012 | 1424 | 416 |
| Right pars opercularis                 | -0.153 | 0.010 | 0.007 | 0.017 | 1418 | 412 |
| Right posterior cingulate cortex       | -0.143 | 0.010 | 0.011 | 0.026 | 1427 | 417 |
| Right supramarginal gyrus              | -0.142 | 0.009 | 0.015 | 0.032 | 1321 | 390 |
| Left precuneus                         | -0.140 | 0.008 | 0.013 | 0.030 | 1426 | 415 |
| Right insula                           | -0.138 | 0.011 | 0.014 | 0.032 | 1415 | 413 |
| Left supramarginal gyrus               | -0.133 | 0.009 | 0.023 | 0.047 | 1310 | 386 |
| Left banks superior temporal sulcus    | -0.132 | 0.011 | 0.026 | 0.050 | 1284 | 378 |
| Right precentral gyrus                 | -0.129 | 0.008 | 0.024 | 0.047 | 1405 | 406 |
| Right parahippocampal gyrus            | -0.128 | 0.016 | 0.023 | 0.047 | 1420 | 415 |
| Left entorhinal cortex                 | -0.127 | 0.024 | 0.030 | 0.055 | 1318 | 385 |
| Left lateral occipital cortex          | -0.126 | 0.008 | 0.026 | 0.050 | 1419 | 410 |
| Right entorhinal cortex                | -0.120 | 0.025 | 0.043 | 0.071 | 1244 | 376 |
| Left medial orbitofrontal cortex       | -0.120 | 0.011 | 0.033 | 0.059 | 1430 | 412 |
| Right banks superior temporal sulcus   | -0.117 | 0.011 | 0.045 | 0.072 | 1321 | 382 |
| Left frontal pole                      | -0.117 | 0.019 | 0.038 | 0.066 | 1435 | 415 |
| Left superior temporal gyrus           | -0.115 | 0.010 | 0.052 | 0.079 | 1296 | 372 |
| Left paracentral lobule                | -0.113 | 0.009 | 0.043 | 0.071 | 1430 | 416 |
| Left posterior cingulate cortex        | -0.113 | 0.010 | 0.044 | 0.071 | 1431 | 415 |
| Left pars triangularis                 | -0.110 | 0.010 | 0.050 | 0.078 | 1434 | 414 |
| Right temporal pole                    | -0.101 | 0.023 | 0.075 | 0.111 | 1430 | 408 |
| Right isthmus cingulate cortex         | -0.096 | 0.012 | 0.086 | 0.126 | 1429 | 418 |
| Left pars orbitalis                    | -0.096 | 0.013 | 0.088 | 0.126 | 1431 | 415 |
| Left rostral anterior cingulate cortex | -0.092 | 0.015 | 0.103 | 0.145 | 1415 | 411 |
| Left precentral gyrus                  | -0.091 | 0.008 | 0.107 | 0.147 | 1408 | 410 |
| Right caudal anterior cingulate cortex | -0.082 | 0.015 | 0.144 | 0.194 | 1422 | 414 |
| Left superior parietal cortex          | -0.082 | 0.007 | 0.148 | 0.196 | 1417 | 405 |



|                                                |        |       |       |       |      |     |
|------------------------------------------------|--------|-------|-------|-------|------|-----|
| <b>Right superior parietal cortex</b>          | -0.080 | 0.008 | 0.159 | 0.206 | 1411 | 405 |
| <b>Right superior temporal gyrus</b>           | -0.077 | 0.010 | 0.188 | 0.240 | 1316 | 381 |
| <b>Right paracentral lobule</b>                | -0.068 | 0.009 | 0.226 | 0.282 | 1432 | 417 |
| <b>Left cuneus</b>                             | -0.066 | 0.008 | 0.249 | 0.306 | 1404 | 397 |
| <b>Left temporal pole</b>                      | -0.054 | 0.022 | 0.341 | 0.411 | 1435 | 416 |
| <b>Right lateral occipital cortex</b>          | -0.050 | 0.008 | 0.381 | 0.452 | 1421 | 408 |
| <b>Left caudal anterior cingulate cortex</b>   | -0.047 | 0.018 | 0.406 | 0.473 | 1415 | 411 |
| <b>Left postcentral gyrus</b>                  | -0.045 | 0.007 | 0.428 | 0.483 | 1403 | 406 |
| <b>Right lingual gyrus</b>                     | -0.045 | 0.008 | 0.424 | 0.483 | 1433 | 414 |
| <b>Right transverse temporal cortex</b>        | -0.040 | 0.013 | 0.478 | 0.531 | 1434 | 418 |
| <b>Right frontal pole</b>                      | -0.038 | 0.019 | 0.496 | 0.543 | 1434 | 418 |
| <b>Right cuneus</b>                            | -0.036 | 0.009 | 0.524 | 0.564 | 1401 | 400 |
| <b>Right postcentral gyrus</b>                 | -0.033 | 0.007 | 0.553 | 0.587 | 1414 | 415 |
| <b>Right rostral anterior cingulate cortex</b> | -0.017 | 0.015 | 0.758 | 0.792 | 1413 | 410 |
| <b>Right pericalcarine gyrus</b>               | -0.009 | 0.008 | 0.879 | 0.880 | 1409 | 407 |
| <b>Left transverse temporal cortex</b>         | 0.008  | 0.013 | 0.880 | 0.880 | 1433 | 416 |
| <b>Left pericalcarine gyrus</b>                | 0.011  | 0.008 | 0.851 | 0.876 | 1406 | 410 |

**TABLE S36b:** Full mega-analytic results for cortical thickness of each structure for the medicated OCD patients on antidepressants & antipsychotics compared with adult healthy controls, controlling for age, sex and scan center.

|                                     | <b>Cohen's d<br/>(Antidepressants +<br/>Antipsychotics vs HC)</b> | <b>Standard error</b> | <b>P-value</b> | <b>FDR P-value</b> | <b>N controls</b> | <b>N antidepressants +<br/>antipsychotics</b> |
|-------------------------------------|-------------------------------------------------------------------|-----------------------|----------------|--------------------|-------------------|-----------------------------------------------|
| Left inferior parietal cortex       | -0.503                                                            | 0.014                 | 9.005E-07      | 3.152E-05          | 1364              | 106                                           |
| Right precuneus                     | -0.498                                                            | 0.014                 | 7.089E-07      | 3.152E-05          | 1429              | 110                                           |
| Left precuneus                      | -0.481                                                            | 0.014                 | 1.506E-06      | 3.513E-05          | 1426              | 111                                           |
| Left superior parietal cortex       | -0.448                                                            | 0.012                 | 8.083E-06      | 1.414E-04          | 1417              | 110                                           |
| Left cortical thickness             | -0.439                                                            | 0.010                 | 1.116E-05      | 1.562E-04          | 1435              | 111                                           |
| Left posterior cingulate cortex     | -0.392                                                            | 0.016                 | 8.670E-05      | 0.001              | 1431              | 111                                           |
| Right cortical thickness            | -0.382                                                            | 0.010                 | 1.276E-04      | 0.001              | 1435              | 111                                           |
| Left supramarginal gyrus            | -0.379                                                            | 0.015                 | 2.306E-04      | 0.002              | 1310              | 105                                           |
| Left medial orbitofrontal cortex    | -0.373                                                            | 0.018                 | 1.844E-04      | 0.002              | 1430              | 111                                           |
| Right posterior cingulate cortex    | -0.369                                                            | 0.017                 | 2.161E-04      | 0.002              | 1427              | 111                                           |
| Right isthmus cingulate cortex      | -0.366                                                            | 0.020                 | 2.476E-04      | 0.002              | 1429              | 111                                           |
| Right superior parietal cortex      | -0.357                                                            | 0.013                 | 3.840E-04      | 0.002              | 1411              | 109                                           |
| Left isthmus cingulate cortex       | -0.355                                                            | 0.021                 | 4.084E-04      | 0.002              | 1431              | 109                                           |
| Right caudal middle frontal gyrus   | -0.349                                                            | 0.016                 | 4.662E-04      | 0.002              | 1423              | 111                                           |
| Left caudal middle frontal gyrus    | -0.348                                                            | 0.015                 | 4.855E-04      | 0.002              | 1429              | 111                                           |
| Left rostral middle frontal gyrus   | -0.342                                                            | 0.014                 | 6.061E-04      | 0.003              | 1429              | 111                                           |
| Right lateral occipital cortex      | -0.336                                                            | 0.014                 | 7.816E-04      | 0.003              | 1421              | 110                                           |
| Left superior frontal gyrus         | -0.329                                                            | 0.016                 | 0.001          | 0.004              | 1413              | 109                                           |
| Right inferior parietal cortex      | -0.328                                                            | 0.014                 | 0.001          | 0.005              | 1379              | 107                                           |
| Right lingual gyrus                 | -0.315                                                            | 0.013                 | 0.002          | 0.005              | 1433              | 111                                           |
| Right precentral gyrus              | -0.305                                                            | 0.014                 | 0.002          | 0.008              | 1405              | 110                                           |
| Right middle temporal gyrus         | -0.300                                                            | 0.016                 | 0.003          | 0.010              | 1402              | 108                                           |
| Left banks superior temporal sulcus | -0.292                                                            | 0.019                 | 0.007          | 0.018              | 1284              | 95                                            |
| Left fusiform gyrus                 | -0.284                                                            | 0.015                 | 0.004          | 0.013              | 1428              | 111                                           |
| Left lateral occipital cortex       | -0.283                                                            | 0.014                 | 0.005          | 0.014              | 1419              | 110                                           |

|                                       |        |       |       |       |      |     |
|---------------------------------------|--------|-------|-------|-------|------|-----|
| Right superior frontal gyrus          | -0.278 | 0.015 | 0.006 | 0.015 | 1410 | 110 |
| Right medial orbitofrontal cortex     | -0.277 | 0.019 | 0.006 | 0.016 | 1428 | 109 |
| Left inferior temporal gyrus          | -0.268 | 0.017 | 0.008 | 0.019 | 1383 | 107 |
| Left lateral orbitofrontal cortex     | -0.266 | 0.017 | 0.008 | 0.019 | 1433 | 111 |
| Right pars orbitalis                  | -0.264 | 0.023 | 0.008 | 0.019 | 1431 | 111 |
| Right supramarginal gyrus             | -0.260 | 0.014 | 0.011 | 0.025 | 1321 | 105 |
| Left paracentral lobule               | -0.257 | 0.016 | 0.010 | 0.023 | 1430 | 110 |
| Right inferior temporal gyrus         | -0.246 | 0.017 | 0.014 | 0.030 | 1400 | 109 |
| Left precentral gyrus                 | -0.245 | 0.014 | 0.014 | 0.030 | 1408 | 111 |
| Left frontal pole                     | -0.234 | 0.033 | 0.019 | 0.038 | 1435 | 111 |
| Right pars triangularis               | -0.229 | 0.016 | 0.021 | 0.042 | 1423 | 111 |
| Right frontal pole                    | -0.218 | 0.033 | 0.029 | 0.054 | 1434 | 110 |
| Right cuneus                          | -0.218 | 0.015 | 0.034 | 0.060 | 1401 | 104 |
| Right lateral orbitofrontal cortex    | -0.218 | 0.018 | 0.029 | 0.054 | 1431 | 111 |
| Right rostral middle frontal gyrus    | -0.210 | 0.014 | 0.036 | 0.061 | 1424 | 110 |
| Left pars opercularis                 | -0.210 | 0.015 | 0.035 | 0.061 | 1427 | 111 |
| Left lingual gyrus                    | -0.204 | 0.013 | 0.040 | 0.067 | 1427 | 111 |
| Left pars orbitalis                   | -0.197 | 0.023 | 0.048 | 0.078 | 1431 | 111 |
| Left middle temporal gyrus            | -0.192 | 0.018 | 0.073 | 0.114 | 1320 | 96  |
| Left cuneus                           | -0.182 | 0.014 | 0.071 | 0.112 | 1404 | 108 |
| Left pars triangularis                | -0.177 | 0.016 | 0.075 | 0.114 | 1434 | 111 |
| Right fusiform gyrus                  | -0.175 | 0.015 | 0.080 | 0.119 | 1428 | 110 |
| Right pars opercularis                | -0.173 | 0.016 | 0.085 | 0.124 | 1418 | 109 |
| Left postcentral gyrus                | -0.168 | 0.012 | 0.092 | 0.132 | 1403 | 111 |
| Left entorhinal cortex                | -0.161 | 0.040 | 0.123 | 0.172 | 1318 | 101 |
| Left insula                           | -0.130 | 0.018 | 0.192 | 0.264 | 1414 | 110 |
| Left caudal anterior cingulate cortex | -0.122 | 0.030 | 0.222 | 0.299 | 1415 | 110 |
| Right entorhinal cortex               | -0.110 | 0.043 | 0.293 | 0.387 | 1244 | 100 |
| Right transverse temporal cortex      | -0.090 | 0.023 | 0.365 | 0.473 | 1434 | 111 |

|                                                |        |       |       |       |      |     |
|------------------------------------------------|--------|-------|-------|-------|------|-----|
| <b>Right insula</b>                            | -0.088 | 0.019 | 0.383 | 0.478 | 1415 | 108 |
| <b>Right parahippocampal cortex</b>            | -0.086 | 0.027 | 0.389 | 0.478 | 1420 | 111 |
| <b>Left rostral anterior cingulate cortex</b>  | -0.083 | 0.026 | 0.407 | 0.491 | 1415 | 109 |
| <b>Left superior temporal gyrus</b>            | -0.076 | 0.018 | 0.480 | 0.560 | 1296 | 95  |
| <b>Right paracentral lobule</b>                | -0.071 | 0.015 | 0.473 | 0.560 | 1432 | 111 |
| <b>Right caudal anterior cingulate cortex</b>  | -0.066 | 0.026 | 0.510 | 0.585 | 1422 | 111 |
| <b>Right superior temporal gyrus</b>           | -0.064 | 0.017 | 0.542 | 0.607 | 1316 | 100 |
| <b>Right banks superior temporal sulcus</b>    | -0.063 | 0.018 | 0.547 | 0.607 | 1321 | 101 |
| <b>Right pericalcarine gyrus</b>               | -0.042 | 0.014 | 0.682 | 0.746 | 1409 | 106 |
| <b>Left transverse temporal cortex</b>         | -0.034 | 0.022 | 0.734 | 0.791 | 1433 | 111 |
| <b>Left temporal pole</b>                      | -0.030 | 0.037 | 0.760 | 0.794 | 1435 | 111 |
| <b>Left parahippocampal cortex</b>             | -0.010 | 0.031 | 0.917 | 0.917 | 1424 | 110 |
| <b>Right postcentral gyrus</b>                 | 0.013  | 0.012 | 0.893 | 0.906 | 1414 | 110 |
| <b>Right rostral anterior cingulate cortex</b> | 0.028  | 0.025 | 0.778 | 0.801 | 1413 | 110 |
| <b>Left pericalcarine gyrus</b>                | 0.032  | 0.014 | 0.750 | 0.794 | 1406 | 109 |
| <b>Right temporal pole</b>                     | 0.089  | 0.039 | 0.373 | 0.474 | 1430 | 111 |

**TABLE S36c:** Full mega-analytic results for cortical thickness of each structure for the medicated OCD patients on antidepressants versus those on antidepressants & antipsychotics, controlling for age, sex and scan center.

|                                       | <b>Cohen's d<br/>(Antidep vs<br/>Antidep + Antipsych</b> | <b>Standard error</b> | <b>P-value</b> | <b>FDR P-value</b> | <b>N<br/>Antidepressants</b> | <b>N Antidepressants +<br/>Antipsychotics</b> |
|---------------------------------------|----------------------------------------------------------|-----------------------|----------------|--------------------|------------------------------|-----------------------------------------------|
| Left superior parietal cortex         | -0.264                                                   | 0.014                 | 0.016          | 0.801              | 405                          | 110                                           |
| Left precuneus                        | -0.195                                                   | 0.018                 | 0.075          | 0.801              | 415                          | 111                                           |
| Left inferior parietal cortex         | -0.187                                                   | 0.017                 | 0.093          | 0.801              | 404                          | 106                                           |
| Right lingual gyrus                   | -0.185                                                   | 0.016                 | 0.090          | 0.801              | 414                          | 111                                           |
| Right precuneus                       | -0.178                                                   | 0.017                 | 0.105          | 0.801              | 416                          | 110                                           |
| Left posterior cingulate cortex       | -0.162                                                   | 0.020                 | 0.137          | 0.801              | 415                          | 111                                           |
| Right superior parietal cortex        | -0.156                                                   | 0.015                 | 0.156          | 0.801              | 405                          | 109                                           |
| Right lateral occipital cortex        | -0.155                                                   | 0.018                 | 0.158          | 0.801              | 408                          | 110                                           |
| Left supramarginal gyrus              | -0.150                                                   | 0.018                 | 0.182          | 0.801              | 386                          | 105                                           |
| Left medial orbitofrontal cortex      | -0.147                                                   | 0.022                 | 0.179          | 0.801              | 412                          | 111                                           |
| Right frontal pole                    | -0.134                                                   | 0.035                 | 0.221          | 0.801              | 418                          | 110                                           |
| Left caudal middle frontal gyrus      | -0.120                                                   | 0.018                 | 0.271          | 0.801              | 414                          | 111                                           |
| Left caudal anterior cingulate cortex | -0.109                                                   | 0.036                 | 0.318          | 0.801              | 411                          | 110                                           |
| Right cuneus                          | -0.102                                                   | 0.017                 | 0.366          | 0.801              | 400                          | 104                                           |
| Left postcentral gyrus                | -0.091                                                   | 0.014                 | 0.407          | 0.801              | 406                          | 111                                           |
| Left lateral occipital cortex         | -0.088                                                   | 0.017                 | 0.422          | 0.801              | 410                          | 110                                           |
| Left isthmus cingulate cortex         | -0.081                                                   | 0.026                 | 0.463          | 0.801              | 416                          | 109                                           |
| Left rostral middle frontal gyrus     | -0.081                                                   | 0.016                 | 0.460          | 0.801              | 411                          | 111                                           |
| Right posterior cingulate cortex      | -0.080                                                   | 0.021                 | 0.461          | 0.801              | 417                          | 111                                           |
| Left cortical thickness               | -0.074                                                   | 0.012                 | 0.499          | 0.801              | 418                          | 111                                           |
| Right isthmus cingulate cortex        | -0.073                                                   | 0.024                 | 0.504          | 0.801              | 418                          | 111                                           |
| Left paracentral lobule               | -0.072                                                   | 0.018                 | 0.509          | 0.801              | 416                          | 110                                           |
| Right precentral gyrus                | -0.071                                                   | 0.017                 | 0.519          | 0.801              | 406                          | 110                                           |
| Left precentral gyrus                 | -0.070                                                   | 0.016                 | 0.522          | 0.801              | 410                          | 111                                           |
| Left frontal pole                     | -0.070                                                   | 0.035                 | 0.522          | 0.801              | 415                          | 111                                           |
| Right pars orbitalis                  | -0.064                                                   | 0.025                 | 0.557          | 0.801              | 418                          | 111                                           |

|                                        |        |       |       |       |     |     |
|----------------------------------------|--------|-------|-------|-------|-----|-----|
| Left pars triangularis                 | -0.062 | 0.019 | 0.567 | 0.801 | 414 | 111 |
| Left pars orbitalis                    | -0.044 | 0.026 | 0.689 | 0.876 | 415 | 111 |
| Right caudal middle frontal gyrus      | -0.041 | 0.018 | 0.705 | 0.881 | 415 | 111 |
| Left banks superior temporal sulcus    | -0.032 | 0.023 | 0.785 | 0.938 | 378 | 95  |
| Right inferior temporal gyrus          | -0.028 | 0.020 | 0.799 | 0.938 | 415 | 109 |
| Right inferior parietal cortex         | -0.028 | 0.016 | 0.804 | 0.938 | 404 | 107 |
| Left cuneus                            | -0.011 | 0.016 | 0.920 | 0.967 | 397 | 108 |
| Left pars opercularis                  | -0.011 | 0.018 | 0.922 | 0.967 | 414 | 111 |
| Right cortical thickness               | -0.009 | 0.013 | 0.936 | 0.967 | 416 | 111 |
| Left lateral orbitofrontal cortex      | -0.003 | 0.021 | 0.976 | 0.990 | 414 | 111 |
| Right medial orbitofrontal cortex      | -0.001 | 0.023 | 0.991 | 0.991 | 414 | 109 |
| Right transverse temporal cortex       | 0.008  | 0.025 | 0.939 | 0.967 | 418 | 111 |
| Right supramarginal gyrus              | 0.012  | 0.018 | 0.914 | 0.967 | 390 | 105 |
| Left temporal pole                     | 0.014  | 0.042 | 0.898 | 0.967 | 416 | 111 |
| Right pars triangularis                | 0.017  | 0.019 | 0.877 | 0.967 | 408 | 111 |
| Right pericalcarine gyrus              | 0.024  | 0.016 | 0.829 | 0.951 | 407 | 106 |
| Right pars opercularis                 | 0.040  | 0.020 | 0.718 | 0.881 | 412 | 109 |
| Right paracentral lobule               | 0.046  | 0.018 | 0.674 | 0.874 | 417 | 111 |
| Left transverse temporal cortex        | 0.053  | 0.026 | 0.624 | 0.824 | 416 | 111 |
| Left lingual gyrus                     | 0.058  | 0.016 | 0.594 | 0.801 | 413 | 111 |
| Left superior frontal gyrus            | 0.059  | 0.018 | 0.595 | 0.801 | 403 | 109 |
| Left inferior temporal gyrus           | 0.060  | 0.021 | 0.591 | 0.801 | 405 | 107 |
| Left entorhinal cortex                 | 0.062  | 0.047 | 0.587 | 0.801 | 385 | 101 |
| Right superior frontal gyrus           | 0.063  | 0.019 | 0.563 | 0.801 | 413 | 110 |
| Right rostral middle frontal gyrus     | 0.064  | 0.016 | 0.558 | 0.801 | 417 | 110 |
| Right parahippocampal cortex           | 0.068  | 0.030 | 0.534 | 0.801 | 415 | 111 |
| Left fusiform gyrus                    | 0.069  | 0.018 | 0.525 | 0.801 | 416 | 111 |
| Left rostral anterior cingulate cortex | 0.076  | 0.032 | 0.492 | 0.801 | 411 | 109 |
| Left pericalcarine gyrus               | 0.077  | 0.016 | 0.483 | 0.801 | 410 | 109 |
| Left insula                            | 0.078  | 0.023 | 0.476 | 0.801 | 410 | 110 |
| Right caudal anterior cingulate cortex | 0.079  | 0.031 | 0.467 | 0.801 | 414 | 111 |

|                                                |       |       |       |       |     |     |
|------------------------------------------------|-------|-------|-------|-------|-----|-----|
| <b>Right middle temporal gyrus</b>             | 0.084 | 0.019 | 0.448 | 0.801 | 407 | 108 |
| <b>Right insula</b>                            | 0.088 | 0.023 | 0.427 | 0.801 | 413 | 108 |
| <b>Left parahippocampal cortex</b>             | 0.100 | 0.037 | 0.361 | 0.801 | 416 | 110 |
| <b>Left superior temporal gyrus</b>            | 0.106 | 0.021 | 0.368 | 0.801 | 372 | 95  |
| <b>Right rostral anterior cingulate cortex</b> | 0.113 | 0.030 | 0.304 | 0.801 | 410 | 110 |
| <b>Right lateral orbitofrontal cortex</b>      | 0.117 | 0.021 | 0.284 | 0.801 | 418 | 111 |
| <b>Right postcentral gyrus</b>                 | 0.126 | 0.014 | 0.250 | 0.801 | 415 | 110 |
| <b>Right superior temporal gyrus</b>           | 0.131 | 0.021 | 0.256 | 0.801 | 381 | 100 |
| <b>Left middle temporal gyrus</b>              | 0.147 | 0.021 | 0.208 | 0.801 | 384 | 96  |
| <b>Right entorhinal cortex</b>                 | 0.148 | 0.049 | 0.198 | 0.801 | 376 | 100 |
| <b>Right fusiform gyrus</b>                    | 0.158 | 0.018 | 0.149 | 0.801 | 408 | 110 |
| <b>Right banks superior temporal sulcus</b>    | 0.173 | 0.022 | 0.130 | 0.801 | 382 | 101 |
| <b>Right temporal pole</b>                     | 0.229 | 0.045 | 0.036 | 0.801 | 408 | 111 |

**TABLE S37a:** Full mega-analytic results for cortical thickness of each structure for the age of onset squared regression analysis in adult OCD patients, controlling for age, sex and scan center. Correlation coefficient Pearsons r is reported.

|                                         | <b>Cohen's d<br/>(AO<sup>2</sup>)</b> | <b>Standard error</b> | <b>P-value</b> | <b>FDR P-value</b> | <b>N patients</b> |
|-----------------------------------------|---------------------------------------|-----------------------|----------------|--------------------|-------------------|
| Right transverse temporal cortex        | -0.048                                | 1.600E-05             | 0.056          | 0.562              | 1417              |
| Right superior temporal cortex          | -0.034                                | 1.264E-05             | 0.031          | 0.538              | 1304              |
| Right banks superior temporal sulcus    | -0.033                                | 1.435E-05             | 0.032          | 0.538              | 1323              |
| Right rostral anterior cingulate cortex | -0.027                                | 1.860E-05             | 0.681          | 0.977              | 1396              |
| Right postcentral gyrus                 | -0.027                                | 8.949E-06             | 0.038          | 0.538              | 1396              |
| Left precentral gyrus                   | -0.017                                | 1.023E-05             | 0.083          | 0.644              | 1393              |
| Left caudal anterior cingulate cortex   | -0.017                                | 2.219E-05             | 0.697          | 0.977              | 1394              |
| Right pars orbitalis                    | -0.014                                | 1.621E-05             | 0.650          | 0.977              | 1416              |
| Left precuneus                          | -0.012                                | 1.009E-05             | 0.187          | 0.977              | 1415              |
| Left supramarginal gyrus                | -0.012                                | 1.144E-05             | 0.277          | 0.977              | 1298              |
| Left postcentral gyrus                  | -0.010                                | 8.918E-06             | 0.226          | 0.977              | 1388              |
| Left parahippocampal gyrus              | -0.008                                | 2.328E-05             | 0.715          | 0.977              | 1410              |
| Right medial orbitofrontal cortex       | -0.007                                | 1.423E-05             | 0.726          | 0.977              | 1408              |
| Right caudal anterior cingulate cortex  | -0.006                                | 1.914E-05             | 0.852          | 0.977              | 1403              |
| Left posterior cingulate cortex         | -0.006                                | 1.223E-05             | 0.536          | 0.977              | 1413              |
| Left pars orbitalis                     | -0.003                                | 1.632E-05             | 0.853          | 0.977              | 1412              |
| Left pericalcarine gyrus                | -0.002                                | 1.002E-05             | 0.667          | 0.977              | 1403              |
| Right lingual gyrus                     | -0.002                                | 9.535E-06             | 0.760          | 0.977              | 1413              |
| Left medial orbitofrontal cortex        | -0.001                                | 1.319E-05             | 0.793          | 0.977              | 1411              |
| Left cuneus                             | -0.001                                | 1.008E-05             | 0.619          | 0.977              | 1387              |
| Left paracentral lobule                 | -0.001                                | 1.170E-05             | 0.416          | 0.977              | 1411              |
| Left inferior parietal cortex           | 0.000                                 | 1.032E-05             | 0.355          | 0.977              | 1358              |
| Left middle temporal cortex             | 0.000                                 | 1.280E-05             | 0.615          | 0.977              | 1301              |
| Right middle temporal cortex            | 0.001                                 | 1.180E-05             | 0.454          | 0.977              | 1388              |
| Right parahippocampal gyrus             | 0.001                                 | 1.905E-05             | 0.588          | 0.977              | 1411              |
| Left pars triangularis                  | 0.002                                 | 1.217E-05             | 0.982          | 0.982              | 1413              |
| Left pars opercularis                   | 0.003                                 | 1.122E-05             | 0.810          | 0.977              | 1412              |



|                                        |       |           |       |       |      |
|----------------------------------------|-------|-----------|-------|-------|------|
| Left lingual gyrus                     | 0.004 | 9.810E-06 | 0.935 | 0.977 | 1411 |
| Right precentral gyrus                 | 0.004 | 1.062E-05 | 0.421 | 0.977 | 1378 |
| Left frontal pole                      | 0.008 | 2.232E-05 | 0.702 | 0.977 | 1413 |
| Right paracentral lobule               | 0.008 | 1.164E-05 | 0.635 | 0.977 | 1414 |
| Right temporal pole                    | 0.009 | 2.833E-05 | 0.922 | 0.977 | 1394 |
| Left temporal pole                     | 0.010 | 2.621E-05 | 0.920 | 0.977 | 1414 |
| Left banks superior temporal sulcus    | 0.010 | 1.365E-05 | 0.638 | 0.977 | 1291 |
| Right inferior parietal cortex         | 0.011 | 1.021E-05 | 0.595 | 0.977 | 1376 |
| Right pericalcarine gyrus              | 0.011 | 1.006E-05 | 0.982 | 0.982 | 1398 |
| Left caudal middle frontal gyrus       | 0.012 | 1.155E-05 | 0.920 | 0.977 | 1400 |
| Left transverse temporal cortex        | 0.012 | 1.633E-05 | 0.601 | 0.977 | 1414 |
| Right supramarginal gyrus              | 0.013 | 1.130E-05 | 0.857 | 0.977 | 1322 |
| Right caudal middle frontal gyrus      | 0.013 | 1.186E-05 | 0.892 | 0.977 | 1407 |
| Left inferior temporal cortex          | 0.017 | 1.221E-05 | 0.701 | 0.977 | 1392 |
| Left rostral anterior cingulate cortex | 0.018 | 1.911E-05 | 0.382 | 0.977 | 1394 |
| Left superior frontal cortex           | 0.020 | 1.164E-05 | 0.368 | 0.977 | 1367 |
| Right superior parietal cortex         | 0.020 | 9.211E-06 | 0.713 | 0.977 | 1389 |
| Left superior temporal cortex          | 0.020 | 1.316E-05 | 0.846 | 0.977 | 1258 |
| Right posterior cingulate cortex       | 0.021 | 1.240E-05 | 0.384 | 0.977 | 1413 |
| Right precuneus                        | 0.021 | 1.023E-05 | 0.920 | 0.977 | 1412 |
| Left insula                            | 0.021 | 1.295E-05 | 0.494 | 0.977 | 1394 |
| Right pars opercularis                 | 0.023 | 1.219E-05 | 0.708 | 0.977 | 1399 |
| Left superior parietal cortex          | 0.024 | 8.931E-06 | 0.820 | 0.977 | 1393 |
| Left cortical thickness                | 0.025 | 7.426E-06 | 0.861 | 0.977 | 1419 |
| Left fusiform gyrus                    | 0.025 | 1.086E-05 | 0.904 | 0.977 | 1410 |
| Right frontal pole                     | 0.026 | 2.254E-05 | 0.287 | 0.977 | 1416 |
| Left isthmus cingulate cortex          | 0.027 | 1.570E-05 | 0.445 | 0.977 | 1413 |
| Right cortical thickness               | 0.028 | 7.502E-06 | 0.791 | 0.977 | 1416 |
| Right pars triangularis                | 0.030 | 1.209E-05 | 0.412 | 0.977 | 1392 |
| Right inferior temporal cortex         | 0.032 | 1.234E-05 | 0.686 | 0.977 | 1409 |
| Right cuneus                           | 0.032 | 1.051E-05 | 0.614 | 0.977 | 1385 |

|                                           |       |           |       |       |      |
|-------------------------------------------|-------|-----------|-------|-------|------|
| <b>Right superior frontal cortex</b>      | 0.033 | 1.132E-05 | 0.079 | 0.644 | 1399 |
| <b>Right rostral middle frontal gyrus</b> | 0.033 | 9.922E-06 | 0.103 | 0.723 | 1414 |
| <b>Right lateral orbitofrontal cortex</b> | 0.033 | 1.271E-05 | 0.213 | 0.977 | 1418 |
| <b>Right isthmus cingulate cortex</b>     | 0.036 | 1.495E-05 | 0.197 | 0.977 | 1418 |
| <b>Right fusiform gyrus</b>               | 0.037 | 1.084E-05 | 0.981 | 0.982 | 1391 |
| <b>Right insula</b>                       | 0.041 | 1.381E-05 | 0.264 | 0.977 | 1384 |
| <b>Left rostral middle frontal gyrus</b>  | 0.042 | 1.019E-05 | 0.047 | 0.546 | 1407 |
| <b>Left entorhinal cortex</b>             | 0.047 | 2.836E-05 | 0.200 | 0.977 | 1307 |
| <b>Right lateral occipital cortex</b>     | 0.051 | 1.033E-05 | 0.346 | 0.977 | 1403 |
| <b>Left lateral occipital cortex</b>      | 0.059 | 1.015E-05 | 0.251 | 0.977 | 1403 |
| <b>Left lateral orbitofrontal cortex</b>  | 0.065 | 1.256E-05 | 0.016 | 0.538 | 1415 |
| <b>Right entorhinal cortex</b>            | 0.094 | 3.059E-05 | 0.008 | 0.538 | 1264 |

**TABLE S37b:** Full mega-analytic results for surface area of each structure for the age of onset squared regression analysis in adult OCD patients, controlling for age, sex, scan center and ICV. Correlation coefficient Pearsons r is reported.

|                                               | <b>Cohen's d<br/>(AO<sup>2</sup>)</b> | <b>Standard error</b> | <b>P-value</b> | <b>FDR P-value</b> | <b>N patients</b> |
|-----------------------------------------------|---------------------------------------|-----------------------|----------------|--------------------|-------------------|
| <b>Left frontal pole</b>                      | -0.089                                | 0.002                 | 0.004          | 0.129              | 1412              |
| <b>Left caudal middle frontal gyrus</b>       | -0.078                                | 0.024                 | 0.003          | 0.129              | 1399              |
| <b>Right superior frontal cortex</b>          | -0.070                                | 0.044                 | 0.016          | 0.156              | 1398              |
| <b>Left medial orbitofrontal cortex</b>       | -0.063                                | 0.015                 | 0.012          | 0.156              | 1410              |
| <b>Right caudal middle frontal gyrus</b>      | -0.058                                | 0.024                 | 0.034          | 0.261              | 1406              |
| <b>Right superior temporal cortex</b>         | -0.057                                | 0.023                 | 0.014          | 0.156              | 1303              |
| <b>Right surface area</b>                     | -0.054                                | 0.343                 | 0.009          | 1.000              | 1416              |
| <b>Right postcentral gyrus</b>                | -0.053                                | 0.027                 | 0.034          | 0.261              | 1395              |
| <b>Left insula</b>                            | -0.053                                | 0.014                 | 0.012          | 0.156              | 1393              |
| <b>Right pars opercularis</b>                 | -0.052                                | 0.016                 | 0.042          | 0.262              | 1399              |
| <b>Right insula</b>                           | -0.047                                | 0.015                 | 0.016          | 0.156              | 1383              |
| <b>Left pars opercularis</b>                  | -0.043                                | 0.018                 | 0.053          | 0.303              | 1411              |
| <b>Right precentral gyrus</b>                 | -0.042                                | 0.033                 | 0.118          | 0.402              | 1377              |
| <b>Left postcentral gyrus</b>                 | -0.042                                | 0.029                 | 0.074          | 0.314              | 1387              |
| <b>Left surface area</b>                      | -0.042                                | 0.340                 | 0.026          | 1.000              | 1418              |
| <b>Right caudal anterior cingulate cortex</b> | -0.040                                | 0.010                 | 0.084          | 0.316              | 1402              |
| <b>Left isthmus cingulate cortex</b>          | -0.039                                | 0.011                 | 0.183          | 0.430              | 1412              |
| <b>Right isthmus cingulate cortex</b>         | -0.039                                | 0.010                 | 0.171          | 0.430              | 1417              |
| <b>Left lateral orbitofrontal cortex</b>      | -0.039                                | 0.017                 | 0.072          | 0.314              | 1414              |
| <b>Right banks superior temporal sulcus</b>   | -0.037                                | 0.010                 | 0.040          | 0.262              | 1322              |
| <b>Right medial orbitofrontal cortex</b>      | -0.036                                | 0.012                 | 0.068          | 0.314              | 1408              |
| <b>Right rostral middle frontal gyrus</b>     | -0.034                                | 0.041                 | 0.079          | 0.314              | 1413              |
| <b>Left paracentral lobule</b>                | -0.034                                | 0.012                 | 0.399          | 0.604              | 1410              |
| <b>Right lateral orbitofrontal cortex</b>     | -0.034                                | 0.018                 | 0.178          | 0.430              | 1417              |
| <b>Right entorhinal cortex</b>                | -0.033                                | 0.006                 | 0.276          | 0.539              | 1263              |
| <b>Left rostral middle frontal gyrus</b>      | -0.032                                | 0.041                 | 0.096          | 0.342              | 1406              |
| <b>Left superior temporal cortex</b>          | -0.032                                | 0.026                 | 0.147          | 0.417              | 1257              |

|                                         |        |       |       |       |      |
|-----------------------------------------|--------|-------|-------|-------|------|
| Right lateral occipital cortex          | -0.029 | 0.035 | 0.210 | 0.475 | 1402 |
| Right middle temporal cortex            | -0.029 | 0.023 | 0.070 | 0.314 | 1388 |
| Left caudal anterior cingulate cortex   | -0.027 | 0.009 | 0.244 | 0.518 | 1393 |
| Right pars triangularis                 | -0.027 | 0.016 | 0.162 | 0.430 | 1391 |
| Left lateral occipital cortex           | -0.027 | 0.033 | 0.240 | 0.518 | 1402 |
| Right superior parietal cortex          | -0.027 | 0.037 | 0.253 | 0.521 | 1388 |
| Left inferior parietal cortex           | -0.024 | 0.039 | 0.146 | 0.417 | 1357 |
| Left middle temporal cortex             | -0.023 | 0.024 | 0.177 | 0.430 | 1300 |
| Right frontal pole                      | -0.023 | 0.003 | 0.597 | 0.739 | 1415 |
| Right precuneus                         | -0.023 | 0.028 | 0.302 | 0.543 | 1411 |
| Left superior frontal cortex            | -0.021 | 0.044 | 0.497 | 0.676 | 1366 |
| Left pars triangularis                  | -0.020 | 0.013 | 0.285 | 0.539 | 1412 |
| Left lingual gyrus                      | -0.019 | 0.026 | 0.144 | 0.417 | 1410 |
| Right lingual gyrus                     | -0.019 | 0.025 | 0.135 | 0.417 | 1412 |
| Right fusiform gyrus                    | -0.019 | 0.025 | 0.320 | 0.558 | 1390 |
| Right posterior cingulate cortex        | -0.018 | 0.012 | 0.365 | 0.589 | 1412 |
| Left banks superior temporal sulcus     | -0.018 | 0.011 | 0.338 | 0.561 | 1290 |
| Left precuneus                          | -0.018 | 0.026 | 0.303 | 0.543 | 1414 |
| Right paracentral lobule                | -0.017 | 0.014 | 0.687 | 0.778 | 1413 |
| Left rostral anterior cingulate cortex  | -0.016 | 0.009 | 0.334 | 0.561 | 1393 |
| Left inferior temporal cortex           | -0.016 | 0.028 | 0.285 | 0.539 | 1391 |
| Left precentral gyrus                   | -0.016 | 0.030 | 0.516 | 0.676 | 1392 |
| Left pars orbitalis                     | -0.014 | 0.005 | 0.527 | 0.676 | 1411 |
| Right parahippocampal gyrus             | -0.011 | 0.007 | 0.525 | 0.676 | 1410 |
| Left entorhinal cortex                  | -0.008 | 0.005 | 0.762 | 0.823 | 1307 |
| Right inferior parietal cortex          | -0.006 | 0.043 | 0.468 | 0.676 | 1375 |
| Left parahippocampal gyrus              | -0.005 | 0.007 | 0.675 | 0.778 | 1409 |
| Left cuneus                             | -0.003 | 0.013 | 0.496 | 0.676 | 1386 |
| Right rostral anterior cingulate cortex | -0.001 | 0.009 | 0.742 | 0.814 | 1396 |
| Right inferior temporal cortex          | 0.003  | 0.028 | 0.579 | 0.729 | 1408 |
| Left superior parietal cortex           | 0.003  | 0.038 | 0.987 | 0.988 | 1392 |

|                                         |       |       |       |       |      |
|-----------------------------------------|-------|-------|-------|-------|------|
| <b>Left fusiform gyrus</b>              | 0.003 | 0.026 | 0.832 | 0.857 | 1409 |
| <b>Left supramarginal gyrus</b>         | 0.003 | 0.034 | 0.742 | 0.814 | 1297 |
| <b>Left transverse temporal cortex</b>  | 0.004 | 0.005 | 0.819 | 0.857 | 1413 |
| <b>Right supramarginal gyrus</b>        | 0.006 | 0.033 | 0.988 | 0.988 | 1321 |
| <b>Left pericalcarine gyrus</b>         | 0.009 | 0.015 | 0.618 | 0.743 | 1402 |
| <b>Left temporal pole</b>               | 0.011 | 0.004 | 0.629 | 0.743 | 1413 |
| <b>Right pars orbitalis</b>             | 0.012 | 0.007 | 0.817 | 0.857 | 1415 |
| <b>Right pericalcarine gyrus</b>        | 0.017 | 0.016 | 0.634 | 0.743 | 1397 |
| <b>Right temporal pole</b>              | 0.022 | 0.004 | 0.381 | 0.589 | 1393 |
| <b>Right transverse temporal cortex</b> | 0.027 | 0.004 | 0.467 | 0.676 | 1416 |
| <b>Left posterior cingulate cortex</b>  | 0.028 | 0.011 | 0.378 | 0.589 | 1412 |
| <b>Right cuneus</b>                     | 0.035 | 0.013 | 0.481 | 0.676 | 1384 |

**TABLE S38a:** Full mega-analytic results for the cortical thickness of each structure for the age of onset squared regression analysis in pediatric OCD patients, controlling for age, sex and scan center. Correlation coefficient Pearsons r is reported.

|                                            | <b>Cohen's d<br/>(AO<sup>2</sup>)</b> | <b>Standard error</b> | <b>P-value</b> | <b>FDR P-value</b> | <b>N patients</b> |
|--------------------------------------------|---------------------------------------|-----------------------|----------------|--------------------|-------------------|
| <b>Left transverse temporal cortex</b>     | -0.174                                | 2.777E-04             | 0.004          | 0.228              | 289               |
| <b>Right lateral occipital cortex</b>      | -0.158                                | 1.571E-04             | 0.009          | 0.228              | 286               |
| <b>Left fusiform gyrus</b>                 | -0.155                                | 1.810E-04             | 0.010          | 0.228              | 286               |
| <b>Right inferior parietal cortex</b>      | -0.136                                | 1.940E-04             | 0.026          | 0.370              | 275               |
| <b>Right pars opercularis</b>              | -0.136                                | 2.229E-04             | 0.025          | 0.370              | 283               |
| <b>Right cuneus</b>                        | -0.127                                | 2.007E-04             | 0.035          | 0.372              | 286               |
| <b>Left middle temporal cortex</b>         | -0.124                                | 2.392E-04             | 0.045          | 0.372              | 272               |
| <b>Left inferior parietal cortex</b>       | -0.120                                | 1.903E-04             | 0.053          | 0.372              | 269               |
| <b>Right inferior temporal cortex</b>      | -0.116                                | 2.214E-04             | 0.057          | 0.372              | 278               |
| <b>Left cuneus</b>                         | -0.116                                | 1.673E-04             | 0.054          | 0.372              | 285               |
| <b>Left cortical thickness</b>             | -0.113                                | 1.308E-04             | 0.059          | 0.372              | 289               |
| <b>Right cortical thickness</b>            | -0.111                                | 1.306E-04             | 0.065          | 0.379              | 289               |
| <b>Left lingual gyrus</b>                  | -0.107                                | 1.668E-04             | 0.077          | 0.413              | 286               |
| <b>Left inferior temporal cortex</b>       | -0.104                                | 2.397E-04             | 0.087          | 0.413              | 280               |
| <b>Left banks superior temporal sulcus</b> | -0.103                                | 2.512E-04             | 0.110          | 0.428              | 253               |
| <b>Left postcentral gyrus</b>              | -0.103                                | 1.648E-04             | 0.095          | 0.413              | 275               |
| <b>Left pars opercularis</b>               | -0.100                                | 2.150E-04             | 0.099          | 0.413              | 282               |
| <b>Left lateral orbitofrontal cortex</b>   | -0.099                                | 2.328E-04             | 0.100          | 0.413              | 288               |
| <b>Right supramarginal gyrus</b>           | -0.097                                | 1.956E-04             | 0.117          | 0.430              | 274               |
| <b>Left supramarginal gyrus</b>            | -0.088                                | 2.001E-04             | 0.159          | 0.506              | 266               |
| <b>Right middle temporal cortex</b>        | -0.086                                | 2.346E-04             | 0.161          | 0.506              | 277               |
| <b>Left precuneus</b>                      | -0.085                                | 1.911E-04             | 0.160          | 0.506              | 285               |
| <b>Left superior temporal cortex</b>       | -0.085                                | 2.263E-04             | 0.178          | 0.506              | 264               |
| <b>Left superior parietal cortex</b>       | -0.080                                | 1.773E-04             | 0.188          | 0.506              | 285               |
| <b>Left insula</b>                         | -0.079                                | 2.133E-04             | 0.194          | 0.506              | 280               |
| <b>Right fusiform gyrus</b>                | -0.078                                | 1.791E-04             | 0.200          | 0.506              | 284               |
| <b>Right pars triangularis</b>             | -0.077                                | 2.349E-04             | 0.201          | 0.506              | 286               |

|                                        |        |           |       |       |     |
|----------------------------------------|--------|-----------|-------|-------|-----|
| Right caudal middle frontal gyrus      | -0.077 | 2.433E-04 | 0.207 | 0.506 | 284 |
| Right postcentral gyrus                | -0.076 | 1.612E-04 | 0.214 | 0.506 | 278 |
| Left lateral occipital cortex          | -0.075 | 1.601E-04 | 0.217 | 0.506 | 286 |
| Left pericalcarine gyrus               | -0.069 | 1.884E-04 | 0.251 | 0.547 | 285 |
| Left pars triangularis                 | -0.069 | 2.323E-04 | 0.257 | 0.547 | 285 |
| Right parahippocampal gyrus            | -0.068 | 3.608E-04 | 0.258 | 0.547 | 285 |
| Right rostral middle frontal gyrus     | -0.065 | 2.003E-04 | 0.280 | 0.577 | 286 |
| Left rostral middle frontal gyrus      | -0.061 | 1.949E-04 | 0.307 | 0.582 | 288 |
| Right insula                           | -0.061 | 2.253E-04 | 0.318 | 0.582 | 276 |
| Right lateral orbitofrontal cortex     | -0.061 | 2.157E-04 | 0.314 | 0.582 | 289 |
| Right pars orbitalis                   | -0.060 | 2.968E-04 | 0.321 | 0.582 | 286 |
| Right banks superior temporal sulcus   | -0.060 | 2.628E-04 | 0.340 | 0.582 | 267 |
| Left paracentral lobule                | -0.058 | 2.212E-04 | 0.337 | 0.582 | 286 |
| Left medial orbitofrontal cortex       | -0.057 | 2.604E-04 | 0.350 | 0.582 | 284 |
| Left rostral anterior cingulate cortex | -0.056 | 3.758E-04 | 0.357 | 0.582 | 278 |
| Right precuneus                        | -0.054 | 1.899E-04 | 0.374 | 0.582 | 282 |
| Right frontal pole                     | -0.054 | 4.391E-04 | 0.371 | 0.582 | 289 |
| Right transverse temporal cortex       | -0.054 | 2.850E-04 | 0.373 | 0.582 | 288 |
| Right medial orbitofrontal cortex      | -0.052 | 2.651E-04 | 0.396 | 0.590 | 283 |
| Right posterior cingulate cortex       | -0.051 | 2.117E-04 | 0.396 | 0.590 | 285 |
| Right superior parietal cortex         | -0.049 | 1.817E-04 | 0.420 | 0.610 | 284 |
| Right caudal anterior cingulate cortex | -0.048 | 3.480E-04 | 0.428 | 0.610 | 284 |
| Left parahippocampal gyrus             | -0.047 | 3.650E-04 | 0.436 | 0.610 | 285 |
| Right temporal pole                    | -0.046 | 5.420E-04 | 0.445 | 0.611 | 285 |
| Left frontal pole                      | -0.044 | 4.662E-04 | 0.463 | 0.623 | 287 |
| Right superior frontal cortex          | -0.038 | 2.441E-04 | 0.539 | 0.710 | 279 |
| Left superior frontal cortex           | -0.037 | 2.312E-04 | 0.548 | 0.710 | 280 |
| Right lingual gyrus                    | -0.034 | 1.646E-04 | 0.574 | 0.717 | 288 |
| Right paracentral lobule               | -0.032 | 2.181E-04 | 0.600 | 0.725 | 286 |
| Right superior temporal cortex         | -0.026 | 2.310E-04 | 0.677 | 0.803 | 272 |
| Right pericalcarine gyrus              | -0.024 | 1.817E-04 | 0.688 | 0.803 | 287 |

|                                         |        |           |       |       |     |
|-----------------------------------------|--------|-----------|-------|-------|-----|
| Left entorhinal cortex                  | -0.017 | 4.483E-04 | 0.783 | 0.884 | 260 |
| Left temporal pole                      | -0.013 | 5.617E-04 | 0.824 | 0.916 | 284 |
| Right isthmus cingulate cortex          | -0.009 | 2.769E-04 | 0.880 | 0.936 | 284 |
| Left pars orbitalis                     | -0.009 | 3.193E-04 | 0.883 | 0.936 | 288 |
| Right rostral anterior cingulate cortex | -0.008 | 3.567E-04 | 0.897 | 0.937 | 281 |
| Right entorhinal cortex                 | -0.003 | 4.622E-04 | 0.965 | 0.979 | 241 |
| Left isthmus cingulate cortex           | 0.001  | 2.950E-04 | 0.992 | 0.992 | 284 |
| Left caudal middle frontal gyrus        | 0.003  | 2.312E-04 | 0.962 | 0.979 | 288 |
| Left posterior cingulate cortex         | 0.009  | 2.365E-04 | 0.877 | 0.936 | 288 |
| Right precentral gyrus                  | 0.018  | 1.969E-04 | 0.770 | 0.883 | 280 |
| Left caudal anterior cingulate cortex   | 0.032  | 3.736E-04 | 0.600 | 0.725 | 282 |
| Left precentral gyrus                   | 0.036  | 1.817E-04 | 0.559 | 0.712 | 281 |



**TABLE S38b:** Full mega-analytic results for the surface area of each structure for the age of onset squared regression analysis in pediatric OCD patients, controlling for age, sex, scan center and ICV. Correlation coefficient Pearsons r is reported.

|                                               | <b>Pearson's r (AO<sup>2</sup>)</b> | <b>Standard error</b> | <b>P-value</b> | <b>FDR P-value</b> | <b>N patients</b> |
|-----------------------------------------------|-------------------------------------|-----------------------|----------------|--------------------|-------------------|
| <b>Left banks superior temporal sulcus</b>    | 0.074                               | 0.207                 | 0.251          | 0.959              | 253               |
| <b>Left caudal anterior cingulate cortex</b>  | -0.066                              | 0.169                 | 0.276          | 0.959              | 282               |
| <b>Left caudal middle frontal gyrus</b>       | 0.050                               | 0.414                 | 0.404          | 0.959              | 288               |
| <b>Left cuneus</b>                            | -0.041                              | 0.233                 | 0.495          | 0.959              | 285               |
| <b>Left entorhinal cortex</b>                 | 0.030                               | 0.089                 | 0.633          | 0.959              | 260               |
| <b>Left fusiform gyrus</b>                    | -0.019                              | 0.448                 | 0.759          | 0.995              | 286               |
| <b>Left inferior parietal cortex</b>          | -0.036                              | 0.657                 | 0.561          | 0.959              | 269               |
| <b>Left inferior temporal cortex</b>          | -0.079                              | 0.496                 | 0.194          | 0.959              | 280               |
| <b>Left isthmus cingulate cortex</b>          | 0.030                               | 0.197                 | 0.624          | 0.959              | 284               |
| <b>Left lateral occipital cortex</b>          | 0.018                               | 0.609                 | 0.768          | 0.995              | 286               |
| <b>Left lateral orbitofrontal cortex</b>      | 0.055                               | 0.356                 | 0.358          | 0.959              | 288               |
| <b>Left lingual gyrus</b>                     | -0.016                              | 0.462                 | 0.796          | 0.995              | 286               |
| <b>Left medial orbitofrontal cortex</b>       | -0.026                              | 0.273                 | 0.672          | 0.959              | 284               |
| <b>Left middle temporal cortex</b>            | 0.001                               | 0.387                 | 0.987          | 0.995              | 272               |
| <b>Left parahippocampal gyrus</b>             | 0.050                               | 0.121                 | 0.409          | 0.959              | 285               |
| <b>Left paracentral lobule</b>                | -0.037                              | 0.218                 | 0.542          | 0.959              | 286               |
| <b>Left pars opercularis</b>                  | 0.040                               | 0.310                 | 0.515          | 0.959              | 282               |
| <b>Left pars orbitalis</b>                    | 0.037                               | 0.097                 | 0.536          | 0.959              | 288               |
| <b>Left pars triangularis</b>                 | 0.022                               | 0.226                 | 0.721          | 0.995              | 285               |
| <b>Left pericalcarine gyrus</b>               | -0.075                              | 0.271                 | 0.218          | 0.959              | 285               |
| <b>Left postcentral gyrus</b>                 | 0.007                               | 0.497                 | 0.914          | 0.995              | 275               |
| <b>Left posterior cingulate cortex</b>        | -0.069                              | 0.206                 | 0.250          | 0.959              | 288               |
| <b>Left precentral gyrus</b>                  | -0.081                              | 0.516                 | 0.183          | 0.959              | 281               |
| <b>Left precuneus</b>                         | 0.005                               | 0.499                 | 0.937          | 0.995              | 285               |
| <b>Left rostral anterior cingulate cortex</b> | 0.038                               | 0.187                 | 0.534          | 0.959              | 278               |
| <b>Left rostral middle frontal gyrus</b>      | 0.005                               | 0.744                 | 0.934          | 0.995              | 288               |
| <b>Left superior frontal cortex</b>           | 0.058                               | 0.764                 | 0.344          | 0.959              | 280               |

|                                        |        |       |       |       |     |
|----------------------------------------|--------|-------|-------|-------|-----|
| Left superior parietal cortex          | 0.032  | 0.712 | 0.593 | 0.959 | 285 |
| Left superior temporal cortex          | 0.144  | 0.479 | 0.022 | 0.959 | 264 |
| Left supramarginal gyrus               | -0.030 | 0.640 | 0.628 | 0.959 | 266 |
| Left frontal pole                      | 0.096  | 0.045 | 0.112 | 0.959 | 287 |
| Left temporal pole                     | 0.049  | 0.081 | 0.418 | 0.959 | 284 |
| Left transverse temporal cortex        | 0.051  | 0.088 | 0.397 | 0.959 | 289 |
| Left insula                            | 0.037  | 0.276 | 0.546 | 0.959 | 280 |
| Right banks superior temporal sulcus   | 0.035  | 0.176 | 0.580 | 0.959 | 267 |
| Right caudal anterior cingulate cortex | -0.018 | 0.168 | 0.770 | 0.995 | 284 |
| Right caudal middle frontal gyrus      | 0.026  | 0.419 | 0.663 | 0.959 | 284 |
| Right cuneus                           | 0.032  | 0.246 | 0.601 | 0.959 | 286 |
| Right entorhinal cortex                | -0.005 | 0.099 | 0.936 | 0.995 | 241 |
| Right fusiform gyrus                   | 0.051  | 0.419 | 0.403 | 0.959 | 284 |
| Right inferior parietal cortex         | 0.052  | 0.757 | 0.404 | 0.959 | 275 |
| Right inferior temporal cortex         | -0.047 | 0.494 | 0.442 | 0.959 | 278 |
| Right isthmus cingulate cortex         | 0.027  | 0.179 | 0.651 | 0.959 | 284 |
| Right lateral occipital cortex         | -0.004 | 0.639 | 0.951 | 0.995 | 286 |
| Right lateral orbitofrontal cortex     | -0.001 | 0.350 | 0.990 | 0.995 | 289 |
| Right lingual gyrus                    | 0.035  | 0.449 | 0.561 | 0.959 | 288 |
| Right medial orbitofrontal cortex      | 0.036  | 0.235 | 0.560 | 0.959 | 283 |
| Right middle temporal cortex           | -0.062 | 0.439 | 0.311 | 0.959 | 277 |
| Right parahippocampal gyrus            | 0.043  | 0.126 | 0.476 | 0.959 | 285 |
| Right paracentral lobule               | 0.000  | 0.266 | 0.995 | 0.995 | 286 |
| Right pars opercularis                 | 0.092  | 0.256 | 0.131 | 0.959 | 283 |
| Right pars orbitalis                   | 0.054  | 0.117 | 0.369 | 0.959 | 286 |
| Right pars triangularis                | -0.001 | 0.271 | 0.983 | 0.995 | 286 |
| Right pericalcarine gyrus              | -0.006 | 0.278 | 0.917 | 0.995 | 287 |
| Right postcentral gyrus                | 0.011  | 0.508 | 0.854 | 0.995 | 278 |
| Right posterior cingulate cortex       | -0.026 | 0.193 | 0.663 | 0.959 | 285 |
| Right precentral gyrus                 | -0.009 | 0.513 | 0.879 | 0.995 | 280 |
| Right precuneus                        | -0.034 | 0.530 | 0.582 | 0.959 | 282 |

|                                                |        |       |       |       |     |
|------------------------------------------------|--------|-------|-------|-------|-----|
| <b>Right rostral anterior cingulate cortex</b> | -0.095 | 0.165 | 0.119 | 0.959 | 281 |
| <b>Right rostral middle frontal gyrus</b>      | 0.037  | 0.785 | 0.536 | 0.959 | 286 |
| <b>Right superior frontal cortex</b>           | 0.087  | 0.855 | 0.156 | 0.959 | 279 |
| <b>Right superior parietal cortex</b>          | -0.038 | 0.685 | 0.530 | 0.959 | 284 |
| <b>Right superior temporal cortex</b>          | 0.054  | 0.437 | 0.387 | 0.959 | 272 |
| <b>Right supramarginal gyrus</b>               | -0.002 | 0.598 | 0.974 | 0.995 | 274 |
| <b>Right frontal pole</b>                      | 0.008  | 0.054 | 0.890 | 0.995 | 289 |
| <b>Right temporal pole</b>                     | 0.007  | 0.074 | 0.902 | 0.995 | 285 |
| <b>Right transverse temporal cortex</b>        | 0.068  | 0.077 | 0.260 | 0.959 | 288 |
| <b>Right insula</b>                            | -0.026 | 0.268 | 0.677 | 0.959 | 276 |
| <b>Left surface area</b>                       | 0.027  | 6.259 | 0.654 | 1.000 | 289 |
| <b>Right surface area</b>                      | 0.028  | 6.448 | 0.644 | 1.000 | 289 |

**TABLE S39a:** Full mega-analytic results for the association between illness duration squared and the cortical thickness of each structure in adult OCD patients, controlling for age, sex and scan center. Correlation coefficient Pearsons r is reported.

|                                               | <b>Pearson's r<br/>(Dur<sup>2</sup>)</b> | <b>Standard error</b> | <b>P-value</b> | <b>FDR P-value</b> | <b>N patients</b> |
|-----------------------------------------------|------------------------------------------|-----------------------|----------------|--------------------|-------------------|
| <b>Right entorhinal cortex</b>                | -0.064                                   | 3.634E-05             | 0.023          | 0.959              | 1265              |
| <b>Left rostral middle frontal gyrus</b>      | -0.044                                   | 1.208E-05             | 0.101          | 0.959              | 1408              |
| <b>Left lateral orbitofrontal cortex</b>      | -0.044                                   | 1.488E-05             | 0.094          | 0.959              | 1416              |
| <b>Right rostral middle frontal gyrus</b>     | -0.040                                   | 1.185E-05             | 0.137          | 0.959              | 1415              |
| <b>Right frontal pole</b>                     | -0.037                                   | 2.692E-05             | 0.169          | 0.968              | 1417              |
| <b>Left entorhinal cortex</b>                 | -0.028                                   | 3.383E-05             | 0.323          | 0.968              | 1308              |
| <b>Right lateral occipital cortex</b>         | -0.027                                   | 1.228E-05             | 0.327          | 0.968              | 1404              |
| <b>Right superior frontal cortex</b>          | -0.026                                   | 1.350E-05             | 0.339          | 0.968              | 1400              |
| <b>Right isthmus cingulate cortex</b>         | -0.018                                   | 1.786E-05             | 0.484          | 0.968              | 1419              |
| <b>Right pericalcarine gyrus</b>              | -0.014                                   | 1.198E-05             | 0.611          | 0.968              | 1399              |
| <b>Left superior frontal cortex</b>           | -0.012                                   | 1.375E-05             | 0.679          | 0.968              | 1368              |
| <b>Left lateral occipital cortex</b>          | -0.010                                   | 1.209E-05             | 0.715          | 0.968              | 1404              |
| <b>Left isthmus cingulate cortex</b>          | -0.010                                   | 1.876E-05             | 0.697          | 0.968              | 1414              |
| <b>Right superior parietal cortex</b>         | -0.008                                   | 1.098E-05             | 0.770          | 0.968              | 1390              |
| <b>Left rostral anterior cingulate cortex</b> | -0.007                                   | 2.276E-05             | 0.797          | 0.968              | 1395              |
| <b>Left transverse temporal cortex</b>        | -0.006                                   | 1.950E-05             | 0.835          | 0.972              | 1415              |
| <b>Right lingual gyrus</b>                    | -0.003                                   | 1.139E-05             | 0.899          | 0.972              | 1414              |
| <b>Left superior parietal cortex</b>          | -0.002                                   | 1.068E-05             | 0.937          | 0.972              | 1394              |
| <b>Right inferior temporal cortex</b>         | -0.001                                   | 1.458E-05             | 0.972          | 0.972              | 1410              |
| <b>Left frontal pole</b>                      | -0.001                                   | 2.665E-05             | 0.967          | 0.972              | 1414              |
| <b>Left temporal pole</b>                     | 0.002                                    | 3.131E-05             | 0.959          | 0.972              | 1415              |
| <b>Right lateral orbitofrontal cortex</b>     | 0.002                                    | 1.520E-05             | 0.954          | 0.972              | 1419              |
| <b>Right temporal pole</b>                    | 0.002                                    | 3.384E-05             | 0.923          | 0.972              | 1394              |
| <b>Right paracentral lobule</b>               | 0.003                                    | 1.389E-05             | 0.926          | 0.972              | 1415              |
| <b>Left inferior temporal cortex</b>          | 0.004                                    | 1.463E-05             | 0.889          | 0.972              | 1393              |
| <b>Left pars orbitalis</b>                    | 0.005                                    | 1.951E-05             | 0.852          | 0.972              | 1413              |
| <b>Right inferior parietal cortex</b>         | 0.006                                    | 1.238E-05             | 0.829          | 0.972              | 1377              |

|                                         |       |           |       |       |      |
|-----------------------------------------|-------|-----------|-------|-------|------|
| Left cortical thickness                 | 0.007 | 8.868E-06 | 0.802 | 0.968 | 1420 |
| Left caudal middle frontal gyrus        | 0.007 | 1.383E-05 | 0.799 | 0.968 | 1401 |
| Right medial orbitofrontal cortex       | 0.008 | 1.696E-05 | 0.763 | 0.968 | 1409 |
| Right cuneus                            | 0.009 | 1.244E-05 | 0.744 | 0.968 | 1386 |
| Left parahippocampal gyrus              | 0.010 | 2.776E-05 | 0.729 | 0.968 | 1411 |
| Left lingual gyrus                      | 0.010 | 1.172E-05 | 0.716 | 0.968 | 1412 |
| Left postcentral gyrus                  | 0.010 | 1.072E-05 | 0.704 | 0.968 | 1389 |
| Left pericalcarine gyrus                | 0.011 | 1.196E-05 | 0.685 | 0.968 | 1404 |
| Right fusiform gyrus                    | 0.011 | 1.287E-05 | 0.692 | 0.968 | 1392 |
| Right cortical thickness                | 0.012 | 8.961E-06 | 0.663 | 0.968 | 1417 |
| Left fusiform gyrus                     | 0.012 | 1.297E-05 | 0.656 | 0.968 | 1411 |
| Left caudal anterior cingulate cortex   | 0.012 | 2.634E-05 | 0.652 | 0.968 | 1395 |
| Left insula                             | 0.012 | 1.575E-05 | 0.660 | 0.968 | 1395 |
| Left cuneus                             | 0.013 | 1.200E-05 | 0.638 | 0.968 | 1388 |
| Right precuneus                         | 0.013 | 1.222E-05 | 0.629 | 0.968 | 1413 |
| Right parahippocampal gyrus             | 0.013 | 2.277E-05 | 0.632 | 0.968 | 1412 |
| Left middle temporal cortex             | 0.013 | 1.521E-05 | 0.620 | 0.968 | 1302 |
| Left banks superior temporal sulcus     | 0.014 | 1.613E-05 | 0.628 | 0.968 | 1292 |
| Right pars opercularis                  | 0.016 | 1.444E-05 | 0.550 | 0.968 | 1400 |
| Left pars triangularis                  | 0.017 | 1.458E-05 | 0.529 | 0.968 | 1414 |
| Right posterior cingulate cortex        | 0.019 | 1.480E-05 | 0.475 | 0.968 | 1414 |
| Right caudal middle frontal gyrus       | 0.021 | 1.412E-05 | 0.442 | 0.968 | 1408 |
| Left medial orbitofrontal cortex        | 0.022 | 1.577E-05 | 0.409 | 0.968 | 1412 |
| Right insula                            | 0.023 | 1.670E-05 | 0.407 | 0.968 | 1385 |
| Right pars triangularis                 | 0.023 | 1.447E-05 | 0.392 | 0.968 | 1393 |
| Right supramarginal gyrus               | 0.023 | 1.377E-05 | 0.400 | 0.968 | 1323 |
| Left pars opercularis                   | 0.024 | 1.340E-05 | 0.385 | 0.968 | 1413 |
| Left paracentral lobule                 | 0.024 | 1.398E-05 | 0.374 | 0.968 | 1412 |
| Right rostral anterior cingulate cortex | 0.025 | 2.225E-05 | 0.361 | 0.968 | 1397 |
| Right middle temporal cortex            | 0.026 | 1.409E-05 | 0.347 | 0.968 | 1389 |
| Right pars orbitalis                    | 0.026 | 1.935E-05 | 0.331 | 0.968 | 1417 |

|                                               |       |           |       |       |      |
|-----------------------------------------------|-------|-----------|-------|-------|------|
| <b>Left superior temporal cortex</b>          | 0.028 | 1.552E-05 | 0.335 | 0.968 | 1259 |
| <b>Left inferior parietal cortex</b>          | 0.030 | 1.238E-05 | 0.274 | 0.968 | 1359 |
| <b>Right precentral gyrus</b>                 | 0.032 | 1.281E-05 | 0.239 | 0.968 | 1379 |
| <b>Left precuneus</b>                         | 0.033 | 1.206E-05 | 0.226 | 0.968 | 1416 |
| <b>Left precentral gyrus</b>                  | 0.036 | 1.225E-05 | 0.183 | 0.968 | 1394 |
| <b>Left posterior cingulate cortex</b>        | 0.037 | 1.460E-05 | 0.173 | 0.968 | 1414 |
| <b>Right caudal anterior cingulate cortex</b> | 0.041 | 2.281E-05 | 0.127 | 0.959 | 1404 |
| <b>Left supramarginal gyrus</b>               | 0.044 | 1.370E-05 | 0.116 | 0.959 | 1299 |
| <b>Right banks superior temporal sulcus</b>   | 0.049 | 1.696E-05 | 0.083 | 0.959 | 1324 |
| <b>Right transverse temporal cortex</b>       | 0.052 | 1.907E-05 | 0.055 | 0.959 | 1418 |
| <b>Right postcentral gyrus</b>                | 0.052 | 1.076E-05 | 0.055 | 0.959 | 1397 |
| <b>Right superior temporal cortex</b>         | 0.060 | 1.510E-05 | 0.034 | 0.959 | 1305 |

**TABLE S39b:** Full mega-analytic results for the association between illness duration squared and the surface area of each structure in adult OCD patients, controlling for age, sex, scan center and ICV. Correlation coefficient Pearsons r is reported.

|                                        | Pearson's r (Dur <sup>2</sup> ) | Standard error | P-value | FDR P-value | N patients |
|----------------------------------------|---------------------------------|----------------|---------|-------------|------------|
| Right temporal pole                    | -0.021                          | 0.005          | 0.422   | 0.573       | 1393       |
| Left rostral anterior cingulate cortex | -0.020                          | 0.011          | 0.646   | 0.732       | 1394       |
| Right pericalcarine gyrus              | -0.015                          | 0.019          | 0.739   | 0.824       | 1398       |
| Left posterior cingulate cortex        | -0.005                          | 0.013          | 0.970   | 0.972       | 1413       |
| Left pericalcarine gyrus               | -0.003                          | 0.017          | 0.579   | 0.690       | 1403       |
| Left parahippocampal gyrus             | -0.002                          | 0.009          | 0.921   | 0.949       | 1410       |
| Right transverse temporal cortex       | -0.002                          | 0.005          | 0.856   | 0.909       | 1417       |
| Left superior parietal cortex          | -0.001                          | 0.046          | 0.972   | 0.972       | 1393       |
| Left fusiform gyrus                    | 0.001                           | 0.031          | 0.771   | 0.845       | 1410       |
| Right cuneus                           | 0.002                           | 0.016          | 0.577   | 0.690       | 1385       |
| Left entorhinal cortex                 | 0.005                           | 0.007          | 0.854   | 0.909       | 1308       |
| Left temporal pole                     | 0.005                           | 0.005          | 0.888   | 0.929       | 1414       |
| Right parahippocampal gyrus            | 0.008                           | 0.008          | 0.620   | 0.715       | 1411       |
| Left middle temporal cortex            | 0.009                           | 0.028          | 0.456   | 0.607       | 1301       |
| Left supramarginal gyrus               | 0.010                           | 0.041          | 0.497   | 0.626       | 1298       |
| Right inferior parietal cortex         | 0.010                           | 0.053          | 0.464   | 0.607       | 1376       |
| Left cuneus                            | 0.011                           | 0.016          | 0.385   | 0.546       | 1387       |
| Right inferior temporal cortex         | 0.011                           | 0.033          | 0.362   | 0.536       | 1409       |
| Right supramarginal gyrus              | 0.014                           | 0.040          | 0.520   | 0.643       | 1322       |
| Left transverse temporal cortex        | 0.016                           | 0.006          | 0.380   | 0.546       | 1414       |
| Left caudal anterior cingulate cortex  | 0.016                           | 0.011          | 0.474   | 0.608       | 1394       |
| Right lateral occipital cortex         | 0.018                           | 0.042          | 0.420   | 0.573       | 1403       |
| Right paracentral lobule               | 0.019                           | 0.017          | 0.604   | 0.709       | 1414       |
| Left lingual gyrus                     | 0.021                           | 0.031          | 0.164   | 0.352       | 1411       |
| Left inferior temporal cortex          | 0.023                           | 0.034          | 0.208   | 0.382       | 1392       |
| Left inferior parietal cortex          | 0.023                           | 0.047          | 0.190   | 0.369       | 1358       |
| Left precentral gyrus                  | 0.024                           | 0.037          | 0.342   | 0.516       | 1393       |

|                                         |       |       |       |       |      |
|-----------------------------------------|-------|-------|-------|-------|------|
| Right rostral anterior cingulate cortex | 0.025 | 0.011 | 0.249 | 0.413 | 1397 |
| Right pars orbitalis                    | 0.025 | 0.008 | 0.268 | 0.425 | 1416 |
| Right banks superior temporal sulcus    | 0.027 | 0.011 | 0.144 | 0.350 | 1323 |
| Right superior parietal cortex          | 0.027 | 0.044 | 0.259 | 0.420 | 1389 |
| Right precuneus                         | 0.027 | 0.033 | 0.242 | 0.413 | 1412 |
| Right lingual gyrus                     | 0.028 | 0.030 | 0.088 | 0.287 | 1413 |
| Right entorhinal cortex                 | 0.029 | 0.008 | 0.333 | 0.514 | 1264 |
| Right lateral orbitofrontal cortex      | 0.030 | 0.022 | 0.238 | 0.413 | 1418 |
| Right fusiform gyrus                    | 0.030 | 0.029 | 0.176 | 0.352 | 1391 |
| Left pars triangularis                  | 0.031 | 0.015 | 0.164 | 0.352 | 1413 |
| Right medial orbitofrontal cortex       | 0.032 | 0.015 | 0.119 | 0.310 | 1409 |
| Right posterior cingulate cortex        | 0.033 | 0.014 | 0.160 | 0.352 | 1413 |
| Left rostral middle frontal gyrus       | 0.035 | 0.048 | 0.099 | 0.304 | 1407 |
| Left precuneus                          | 0.035 | 0.031 | 0.112 | 0.304 | 1415 |
| Right middle temporal cortex            | 0.036 | 0.028 | 0.055 | 0.232 | 1389 |
| Left lateral orbitofrontal cortex       | 0.036 | 0.020 | 0.103 | 0.304 | 1415 |
| Left superior frontal cortex            | 0.037 | 0.053 | 0.207 | 0.382 | 1367 |
| Right precentral gyrus                  | 0.037 | 0.040 | 0.172 | 0.352 | 1378 |
| Right frontal pole                      | 0.038 | 0.004 | 0.248 | 0.413 | 1416 |
| Left pars orbitalis                     | 0.040 | 0.006 | 0.109 | 0.304 | 1412 |
| Right isthmus cingulate cortex          | 0.041 | 0.012 | 0.141 | 0.350 | 1418 |
| Right rostral middle frontal gyrus      | 0.042 | 0.049 | 0.052 | 0.232 | 1414 |
| Left banks superior temporal sulcus     | 0.043 | 0.014 | 0.065 | 0.246 | 1291 |
| Left lateral occipital cortex           | 0.044 | 0.040 | 0.076 | 0.259 | 1403 |
| Left pars opercularis                   | 0.045 | 0.021 | 0.051 | 0.232 | 1412 |
| Left superior temporal cortex           | 0.045 | 0.031 | 0.072 | 0.258 | 1258 |
| Left paracentral lobule                 | 0.046 | 0.014 | 0.174 | 0.352 | 1411 |
| Left insula                             | 0.047 | 0.017 | 0.035 | 0.232 | 1394 |
| Right pars opercularis                  | 0.050 | 0.019 | 0.054 | 0.232 | 1400 |
| Right caudal anterior cingulate cortex  | 0.051 | 0.012 | 0.036 | 0.232 | 1403 |
| Right postcentral gyrus                 | 0.052 | 0.033 | 0.040 | 0.232 | 1396 |



|                                          |       |       |       |       |      |
|------------------------------------------|-------|-------|-------|-------|------|
| <b>Right caudal middle frontal gyrus</b> | 0.054 | 0.029 | 0.048 | 0.232 | 1407 |
| <b>Left surface area</b>                 | 0.054 | 0.406 | 0.011 | 1.000 | 1419 |
| <b>Right superior frontal cortex</b>     | 0.054 | 0.052 | 0.060 | 0.239 | 1399 |
| <b>Left medial orbitofrontal cortex</b>  | 0.059 | 0.018 | 0.020 | 0.191 | 1411 |
| <b>Left isthmus cingulate cortex</b>     | 0.061 | 0.013 | 0.030 | 0.232 | 1413 |
| <b>Left postcentral gyrus</b>            | 0.062 | 0.035 | 0.014 | 0.159 | 1388 |
| <b>Right surface area</b>                | 0.062 | 0.411 | 0.005 | 1.000 | 1417 |
| <b>Right pars triangularis</b>           | 0.064 | 0.019 | 0.007 | 0.107 | 1392 |
| <b>Right insula</b>                      | 0.064 | 0.019 | 0.004 | 0.107 | 1384 |
| <b>Right superior temporal cortex</b>    | 0.071 | 0.027 | 0.005 | 0.107 | 1304 |
| <b>Left caudal middle frontal gyrus</b>  | 0.071 | 0.028 | 0.007 | 0.107 | 1400 |
| <b>Left frontal pole</b>                 | 0.080 | 0.003 | 0.008 | 0.107 | 1413 |

**TABLE S40a:** Full mega-analytic results for the association between illness squared duration and the cortical thickness of each structure in pediatric OCD patients, controlling for age, sex and scan center. Correlation coefficient Pearsons r is reported.

|                                         | <b>Pearson's r<br/>(Dur<sup>2</sup>)</b> | <b>Standard error</b> | <b>P-value</b> | <b>FDR P-value</b> | <b>N patients</b> |
|-----------------------------------------|------------------------------------------|-----------------------|----------------|--------------------|-------------------|
| Left entorhinal cortex                  | -0.038                                   | 8.245E-04             | 0.549          | 0.752              | 260               |
| Left precentral gyrus                   | -0.025                                   | 3.339E-04             | 0.680          | 0.846              | 281               |
| Left posterior cingulate cortex         | -0.024                                   | 4.332E-04             | 0.686          | 0.846              | 288               |
| Right precentral gyrus                  | -0.022                                   | 3.601E-04             | 0.718          | 0.851              | 280               |
| Right superior parietal cortex          | -0.018                                   | 3.354E-04             | 0.765          | 0.878              | 284               |
| Right entorhinal cortex                 | -0.014                                   | 8.641E-04             | 0.835          | 0.905              | 241               |
| Left caudal anterior cingulate cortex   | -0.007                                   | 6.842E-04             | 0.904          | 0.931              | 282               |
| Right pericalcarine gyrus               | -0.004                                   | 3.331E-04             | 0.944          | 0.958              | 287               |
| Left caudal middle frontal gyrus        | -0.003                                   | 4.242E-04             | 0.965          | 0.965              | 288               |
| Left rostral anterior cingulate cortex  | 0.010                                    | 6.831E-04             | 0.868          | 0.906              | 278               |
| Right rostral anterior cingulate cortex | 0.011                                    | 6.596E-04             | 0.853          | 0.905              | 281               |
| Right medial orbitofrontal cortex       | 0.012                                    | 4.889E-04             | 0.849          | 0.905              | 283               |
| Right lingual gyrus                     | 0.015                                    | 3.017E-04             | 0.807          | 0.897              | 288               |
| Left temporal pole                      | 0.017                                    | 1.061E-03             | 0.784          | 0.885              | 284               |
| Left parahippocampal gyrus              | 0.019                                    | 6.709E-04             | 0.759          | 0.878              | 285               |
| Left pars orbitalis                     | 0.023                                    | 5.851E-04             | 0.708          | 0.851              | 288               |
| Left superior frontal cortex            | 0.024                                    | 4.243E-04             | 0.689          | 0.846              | 280               |
| Left isthmus cingulate cortex           | 0.027                                    | 5.386E-04             | 0.658          | 0.846              | 284               |
| Right transverse temporal cortex        | 0.030                                    | 5.226E-04             | 0.614          | 0.811              | 288               |
| Left paracentral lobule                 | 0.035                                    | 4.054E-04             | 0.558          | 0.752              | 286               |
| Left pericalcarine gyrus                | 0.037                                    | 3.449E-04             | 0.538          | 0.752              | 285               |
| Left lateral occipital cortex           | 0.039                                    | 2.941E-04             | 0.523          | 0.747              | 286               |
| Left medial orbitofrontal cortex        | 0.042                                    | 4.707E-04             | 0.491          | 0.717              | 284               |
| Left lingual gyrus                      | 0.043                                    | 3.076E-04             | 0.480          | 0.716              | 286               |
| Right supramarginal gyrus               | 0.048                                    | 3.697E-04             | 0.436          | 0.664              | 274               |
| Right precuneus                         | 0.048                                    | 3.436E-04             | 0.429          | 0.664              | 282               |
| Right isthmus cingulate cortex          | 0.049                                    | 5.025E-04             | 0.416          | 0.661              | 284               |

|                                        |       |           |       |       |     |
|----------------------------------------|-------|-----------|-------|-------|-----|
| Right parahippocampal gyrus            | 0.052 | 6.620E-04 | 0.393 | 0.640 | 285 |
| Right middle temporal cortex           | 0.053 | 4.302E-04 | 0.391 | 0.640 | 277 |
| Right posterior cingulate cortex       | 0.053 | 3.857E-04 | 0.383 | 0.640 | 285 |
| Right caudal anterior cingulate cortex | 0.053 | 6.400E-04 | 0.378 | 0.640 | 284 |
| Right lateral orbitofrontal cortex     | 0.055 | 3.955E-04 | 0.358 | 0.640 | 289 |
| Right paracentral lobule               | 0.057 | 3.990E-04 | 0.345 | 0.635 | 286 |
| Left superior parietal cortex          | 0.058 | 3.255E-04 | 0.339 | 0.635 | 285 |
| Right superior temporal cortex         | 0.060 | 4.268E-04 | 0.334 | 0.635 | 272 |
| Right postcentral gyrus                | 0.062 | 2.976E-04 | 0.314 | 0.627 | 278 |
| Right frontal pole                     | 0.062 | 8.046E-04 | 0.301 | 0.620 | 289 |
| Left pars triangularis                 | 0.063 | 4.246E-04 | 0.297 | 0.620 | 285 |
| Left pars opercularis                  | 0.066 | 3.941E-04 | 0.279 | 0.609 | 282 |
| Left cuneus                            | 0.066 | 3.073E-04 | 0.273 | 0.609 | 285 |
| Left precuneus                         | 0.068 | 3.498E-04 | 0.263 | 0.609 | 285 |
| Right fusiform gyrus                   | 0.068 | 3.291E-04 | 0.262 | 0.609 | 284 |
| Right superior frontal cortex          | 0.068 | 4.502E-04 | 0.266 | 0.609 | 279 |
| Left rostral middle frontal gyrus      | 0.071 | 3.542E-04 | 0.240 | 0.609 | 288 |
| Right banks superior temporal sulcus   | 0.077 | 4.775E-04 | 0.217 | 0.583 | 267 |
| Right insula                           | 0.079 | 4.375E-04 | 0.200 | 0.561 | 276 |
| Right inferior parietal cortex         | 0.081 | 3.667E-04 | 0.188 | 0.547 | 275 |
| Left insula                            | 0.081 | 3.970E-04 | 0.183 | 0.547 | 280 |
| Right temporal pole                    | 0.082 | 9.901E-04 | 0.174 | 0.547 | 285 |
| Left supramarginal gyrus               | 0.083 | 3.773E-04 | 0.184 | 0.547 | 266 |
| Left postcentral gyrus                 | 0.085 | 3.014E-04 | 0.168 | 0.547 | 275 |
| Left frontal pole                      | 0.091 | 8.517E-04 | 0.133 | 0.489 | 287 |
| Right lateral occipital cortex         | 0.091 | 2.904E-04 | 0.130 | 0.489 | 286 |
| Right cuneus                           | 0.092 | 3.692E-04 | 0.127 | 0.489 | 286 |
| Right rostral middle frontal gyrus     | 0.097 | 3.678E-04 | 0.107 | 0.467 | 286 |
| Left fusiform gyrus                    | 0.101 | 3.469E-04 | 0.093 | 0.454 | 286 |
| Left cortical thickness                | 0.101 | 2.401E-04 | 0.091 | 0.454 | 289 |
| Left inferior parietal cortex          | 0.103 | 3.602E-04 | 0.097 | 0.454 | 269 |

|                                            |       |           |       |       |     |
|--------------------------------------------|-------|-----------|-------|-------|-----|
| <b>Right pars orbitalis</b>                | 0.106 | 5.453E-04 | 0.080 | 0.454 | 286 |
| <b>Right cortical thickness</b>            | 0.106 | 2.395E-04 | 0.077 | 0.454 | 289 |
| <b>Right pars opercularis</b>              | 0.109 | 4.082E-04 | 0.071 | 0.454 | 283 |
| <b>Right pars triangularis</b>             | 0.113 | 4.289E-04 | 0.060 | 0.454 | 286 |
| <b>Right caudal middle frontal gyrus</b>   | 0.114 | 4.438E-04 | 0.059 | 0.454 | 284 |
| <b>Left banks superior temporal sulcus</b> | 0.119 | 4.572E-04 | 0.065 | 0.454 | 253 |
| <b>Left superior temporal cortex</b>       | 0.127 | 4.209E-04 | 0.044 | 0.454 | 264 |
| <b>Left lateral orbitofrontal cortex</b>   | 0.129 | 4.263E-04 | 0.032 | 0.444 | 288 |
| <b>Left inferior temporal cortex</b>       | 0.135 | 4.560E-04 | 0.026 | 0.444 | 280 |
| <b>Left middle temporal cortex</b>         | 0.154 | 4.336E-04 | 0.013 | 0.296 | 272 |
| <b>Left transverse temporal cortex</b>     | 0.164 | 5.099E-04 | 0.006 | 0.216 | 289 |
| <b>Right inferior temporal cortex</b>      | 0.187 | 4.025E-04 | 0.002 | 0.150 | 278 |

**TABLE S40b:** Full mega-analytic results for the association between illness duration squared and the surface area of each structure in pediatric OCD patients, controlling for age, sex, scan center and ICV. Correlation coefficient Pearsons r is reported.

|                                        | <b>Pearson's r<br/>(Dur<sup>2</sup>)</b> | <b>Standard error</b> | <b>P-value</b> | <b>FDR P-value</b> | <b>N patients</b> |
|----------------------------------------|------------------------------------------|-----------------------|----------------|--------------------|-------------------|
| Left frontal pole                      | -0.143                                   | 0.082                 | 0.017          | 0.866              | 287               |
| Left superior temporal cortex          | -0.109                                   | 0.899                 | 0.085          | 0.866              | 264               |
| Left entorhinal cortex                 | -0.103                                   | 0.163                 | 0.104          | 0.866              | 260               |
| Right transverse temporal cortex       | -0.093                                   | 0.140                 | 0.124          | 0.866              | 288               |
| Right banks superior temporal sulcus   | -0.081                                   | 0.319                 | 0.196          | 0.866              | 267               |
| Left rostral anterior cingulate cortex | -0.077                                   | 0.338                 | 0.212          | 0.866              | 278               |
| Left lateral orbitofrontal cortex      | -0.068                                   | 0.655                 | 0.259          | 0.866              | 288               |
| Left isthmus cingulate cortex          | -0.064                                   | 0.359                 | 0.293          | 0.866              | 284               |
| Left transverse temporal cortex        | -0.063                                   | 0.160                 | 0.298          | 0.866              | 289               |
| Left superior parietal cortex          | -0.062                                   | 1.304                 | 0.309          | 0.866              | 285               |
| Right superior frontal cortex          | -0.061                                   | 1.582                 | 0.318          | 0.866              | 279               |
| Right rostral middle frontal gyrus     | -0.059                                   | 1.443                 | 0.334          | 0.866              | 286               |
| Left temporal pole                     | -0.055                                   | 0.152                 | 0.365          | 0.866              | 284               |
| Left banks superior temporal sulcus    | -0.052                                   | 0.378                 | 0.419          | 0.866              | 253               |
| Right inferior parietal cortex         | -0.049                                   | 1.422                 | 0.429          | 0.866              | 275               |
| Right postcentral gyrus                | -0.047                                   | 0.937                 | 0.444          | 0.866              | 278               |
| Right isthmus cingulate cortex         | -0.046                                   | 0.324                 | 0.450          | 0.866              | 284               |
| Left caudal middle frontal gyrus       | -0.045                                   | 0.760                 | 0.451          | 0.866              | 288               |
| Right temporal pole                    | -0.045                                   | 0.136                 | 0.460          | 0.866              | 285               |
| Left precuneus                         | -0.042                                   | 0.911                 | 0.486          | 0.866              | 285               |
| Right pars opercularis                 | -0.042                                   | 0.469                 | 0.491          | 0.866              | 283               |
| Left middle temporal cortex            | -0.041                                   | 0.704                 | 0.509          | 0.866              | 272               |
| Left postcentral gyrus                 | -0.040                                   | 0.907                 | 0.517          | 0.866              | 275               |
| Right superior temporal cortex         | -0.040                                   | 0.810                 | 0.523          | 0.866              | 272               |
| Left insula                            | -0.040                                   | 0.514                 | 0.517          | 0.866              | 280               |
| Left superior frontal cortex           | -0.039                                   | 1.403                 | 0.522          | 0.866              | 280               |
| Right lingual gyrus                    | -0.038                                   | 0.823                 | 0.529          | 0.866              | 288               |

|                                        |        |        |       |       |     |
|----------------------------------------|--------|--------|-------|-------|-----|
| Left pars opercularis                  | -0.037 | 0.568  | 0.545 | 0.866 | 282 |
| Right medial orbitofrontal cortex      | -0.037 | 0.432  | 0.548 | 0.866 | 283 |
| Left surface area                      | -0.036 | 11.472 | 0.547 | 1.000 | 289 |
| Right caudal middle frontal gyrus      | -0.031 | 0.766  | 0.615 | 0.930 | 284 |
| Right fusiform gyrus                   | -0.025 | 0.770  | 0.678 | 0.968 | 284 |
| Right surface area                     | -0.024 | 11.823 | 0.690 | 1.000 | 289 |
| Left parahippocampal gyrus             | -0.023 | 0.223  | 0.703 | 0.968 | 285 |
| Left pars triangularis                 | -0.017 | 0.413  | 0.778 | 0.968 | 285 |
| Right caudal anterior cingulate cortex | -0.017 | 0.309  | 0.784 | 0.968 | 284 |
| Right precuneus                        | -0.012 | 0.960  | 0.850 | 0.968 | 282 |
| Right frontal pole                     | -0.010 | 0.098  | 0.869 | 0.968 | 289 |
| Left rostral middle frontal gyrus      | -0.007 | 1.353  | 0.913 | 0.972 | 288 |
| Left lingual gyrus                     | -0.007 | 0.848  | 0.914 | 0.972 | 286 |
| Left pars orbitalis                    | -0.006 | 0.177  | 0.925 | 0.972 | 288 |
| Right pars orbitalis                   | -0.004 | 0.216  | 0.946 | 0.975 | 286 |
| Left fusiform gyrus                    | 0.000  | 0.854  | 1.000 | 1.000 | 286 |
| Right cuneus                           | 0.003  | 0.450  | 0.964 | 0.979 | 286 |
| Right parahippocampal gyrus            | 0.005  | 0.231  | 0.929 | 0.972 | 285 |
| Right inferior temporal cortex         | 0.011  | 0.909  | 0.855 | 0.968 | 278 |
| Left supramarginal gyrus               | 0.012  | 1.207  | 0.852 | 0.968 | 266 |
| Right lateral orbitofrontal cortex     | 0.013  | 0.642  | 0.833 | 0.968 | 289 |
| Right pericalcarine gyrus              | 0.014  | 0.509  | 0.822 | 0.968 | 287 |
| Right middle temporal cortex           | 0.014  | 0.805  | 0.820 | 0.968 | 277 |
| Right supramarginal gyrus              | 0.018  | 1.126  | 0.775 | 0.968 | 274 |
| Left medial orbitofrontal cortex       | 0.020  | 0.493  | 0.739 | 0.968 | 284 |
| Right pars triangularis                | 0.021  | 0.496  | 0.729 | 0.968 | 286 |
| Right entorhinal cortex                | 0.025  | 0.185  | 0.701 | 0.968 | 241 |
| Right superior parietal cortex         | 0.028  | 1.265  | 0.640 | 0.947 | 284 |
| Left inferior parietal cortex          | 0.034  | 1.241  | 0.591 | 0.914 | 269 |
| Right precentral gyrus                 | 0.038  | 0.937  | 0.535 | 0.866 | 280 |
| Left lateral occipital cortex          | 0.038  | 1.115  | 0.528 | 0.866 | 286 |

|                                                |       |       |       |       |     |
|------------------------------------------------|-------|-------|-------|-------|-----|
| <b>Right posterior cingulate cortex</b>        | 0.039 | 0.352 | 0.525 | 0.866 | 285 |
| <b>Right insula</b>                            | 0.040 | 0.521 | 0.513 | 0.866 | 276 |
| <b>Right paracentral lobule</b>                | 0.045 | 0.486 | 0.455 | 0.866 | 286 |
| <b>Right lateral occipital cortex</b>          | 0.052 | 1.170 | 0.390 | 0.866 | 286 |
| <b>Left cuneus</b>                             | 0.057 | 0.426 | 0.348 | 0.866 | 285 |
| <b>Left posterior cingulate cortex</b>         | 0.065 | 0.378 | 0.281 | 0.866 | 288 |
| <b>Left precentral gyrus</b>                   | 0.066 | 0.950 | 0.282 | 0.866 | 281 |
| <b>Left pericalcarine gyrus</b>                | 0.071 | 0.495 | 0.241 | 0.866 | 285 |
| <b>Left inferior temporal cortex</b>           | 0.080 | 0.948 | 0.192 | 0.866 | 280 |
| <b>Left paracentral lobule</b>                 | 0.083 | 0.398 | 0.171 | 0.866 | 286 |
| <b>Left caudal anterior cingulate cortex</b>   | 0.094 | 0.309 | 0.123 | 0.866 | 282 |
| <b>Right rostral anterior cingulate cortex</b> | 0.099 | 0.305 | 0.105 | 0.866 | 281 |

**TABLE S41a:** Full mega-analytic results for the association between illness severity squared and the cortical thickness of each structure in adult OCD patients based on the YBOCS, controlling for age, sex and scan center. Correlation coefficient Pearsons r is reported.

|                                      | Pearson's r (YBOCS <sup>2</sup> ) | Standard error | P-value | FDR P-value | N patients |
|--------------------------------------|-----------------------------------|----------------|---------|-------------|------------|
| Right pericalcarine gyrus            | -0.066                            | 1.146E-05      | 0.013   | 0.753       | 1433       |
| Right parahippocampal gyrus          | -0.061                            | 2.194E-05      | 0.022   | 0.753       | 1443       |
| Left pericalcarine gyrus             | -0.055                            | 1.156E-05      | 0.038   | 0.879       | 1437       |
| Left postcentral gyrus               | -0.050                            | 1.023E-05      | 0.061   | 0.879       | 1421       |
| Right transverse temporal cortex     | -0.041                            | 1.825E-05      | 0.118   | 0.894       | 1451       |
| Left parahippocampal gyrus           | -0.039                            | 2.701E-05      | 0.137   | 0.894       | 1446       |
| Left lingual gyrus                   | -0.038                            | 1.127E-05      | 0.148   | 0.894       | 1445       |
| Left cuneus                          | -0.038                            | 1.157E-05      | 0.159   | 0.894       | 1420       |
| Left inferior parietal cortex        | -0.037                            | 1.190E-05      | 0.175   | 0.894       | 1392       |
| Left supramarginal gyrus             | -0.036                            | 1.308E-05      | 0.192   | 0.894       | 1326       |
| Right frontal pole                   | -0.033                            | 2.582E-05      | 0.217   | 0.894       | 1450       |
| Right postcentral gyrus              | -0.032                            | 1.032E-05      | 0.236   | 0.894       | 1429       |
| Left insula                          | -0.031                            | 1.481E-05      | 0.245   | 0.894       | 1427       |
| Left caudal middle frontal gyrus     | -0.031                            | 1.327E-05      | 0.253   | 0.894       | 1433       |
| Left transverse temporal cortex      | -0.030                            | 1.901E-05      | 0.256   | 0.894       | 1448       |
| Left middle temporal cortex          | -0.027                            | 1.452E-05      | 0.336   | 0.894       | 1330       |
| Right precuneus                      | -0.027                            | 1.182E-05      | 0.317   | 0.894       | 1446       |
| Left frontal pole                    | -0.027                            | 2.567E-05      | 0.317   | 0.894       | 1445       |
| Left paracentral lobule              | -0.025                            | 1.356E-05      | 0.345   | 0.894       | 1445       |
| Right banks superior temporal sulcus | -0.025                            | 1.588E-05      | 0.366   | 0.904       | 1351       |
| Left superior temporal cortex        | -0.019                            | 1.522E-05      | 0.491   | 0.958       | 1295       |
| Right cuneus                         | -0.019                            | 1.191E-05      | 0.471   | 0.958       | 1419       |
| Left cortical thickness              | -0.019                            | 8.558E-06      | 0.473   | 0.958       | 1453       |
| Right lateral occipital cortex       | -0.017                            | 1.195E-05      | 0.529   | 0.958       | 1434       |
| Left precuneus                       | -0.015                            | 1.158E-05      | 0.566   | 0.958       | 1448       |
| Left lateral occipital cortex        | -0.013                            | 1.173E-05      | 0.618   | 0.958       | 1435       |
| Right pars triangularis              | -0.013                            | 1.393E-05      | 0.630   | 0.958       | 1420       |



|                                    |        |           |       |       |      |
|------------------------------------|--------|-----------|-------|-------|------|
| Right paracentral lobule           | -0.013 | 1.336E-05 | 0.628 | 0.958 | 1449 |
| Right insula                       | -0.012 | 1.571E-05 | 0.652 | 0.958 | 1418 |
| Right precentral gyrus             | -0.012 | 1.205E-05 | 0.659 | 0.958 | 1412 |
| Left posterior cingulate cortex    | -0.012 | 1.394E-05 | 0.654 | 0.958 | 1448 |
| Left medial orbitofrontal cortex   | -0.012 | 1.497E-05 | 0.660 | 0.958 | 1445 |
| Right lingual gyrus                | -0.008 | 1.093E-05 | 0.765 | 0.958 | 1447 |
| Left pars opercularis              | -0.007 | 1.295E-05 | 0.787 | 0.958 | 1445 |
| Left entorhinal cortex             | -0.007 | 3.343E-05 | 0.806 | 0.958 | 1340 |
| Right supramarginal gyrus          | -0.007 | 1.299E-05 | 0.807 | 0.958 | 1350 |
| Right superior temporal cortex     | -0.005 | 1.433E-05 | 0.841 | 0.958 | 1338 |
| Left rostral middle frontal gyrus  | -0.005 | 1.137E-05 | 0.862 | 0.958 | 1440 |
| Right cortical thickness           | -0.004 | 8.612E-06 | 0.894 | 0.962 | 1448 |
| Left pars triangularis             | -0.003 | 1.402E-05 | 0.919 | 0.973 | 1446 |
| Left precentral gyrus              | -0.001 | 1.182E-05 | 0.974 | 0.985 | 1427 |
| Right isthmus cingulate cortex     | 0.001  | 1.741E-05 | 0.985 | 0.985 | 1451 |
| Right fusiform gyrus               | 0.001  | 1.247E-05 | 0.977 | 0.985 | 1419 |
| Left isthmus cingulate cortex      | 0.002  | 1.793E-05 | 0.932 | 0.973 | 1447 |
| Left superior frontal cortex       | 0.004  | 1.312E-05 | 0.876 | 0.958 | 1398 |
| Right posterior cingulate cortex   | 0.004  | 1.419E-05 | 0.869 | 0.958 | 1449 |
| Left superior parietal cortex      | 0.005  | 1.031E-05 | 0.855 | 0.958 | 1424 |
| Right pars opercularis             | 0.005  | 1.380E-05 | 0.852 | 0.958 | 1434 |
| Right superior parietal cortex     | 0.006  | 1.062E-05 | 0.807 | 0.958 | 1424 |
| Right inferior parietal cortex     | 0.007  | 1.178E-05 | 0.792 | 0.958 | 1410 |
| Right rostral middle frontal gyrus | 0.007  | 1.115E-05 | 0.785 | 0.958 | 1448 |
| Left pars orbitalis                | 0.007  | 1.876E-05 | 0.782 | 0.958 | 1444 |
| Left fusiform gyrus                | 0.009  | 1.252E-05 | 0.737 | 0.958 | 1443 |
| Right superior frontal cortex      | 0.009  | 1.301E-05 | 0.721 | 0.958 | 1437 |
| Left temporal pole                 | 0.012  | 3.037E-05 | 0.664 | 0.958 | 1448 |
| Right middle temporal cortex       | 0.012  | 1.348E-05 | 0.653 | 0.958 | 1425 |
| Left inferior temporal cortex      | 0.013  | 1.416E-05 | 0.637 | 0.958 | 1425 |
| Right temporal pole                | 0.013  | 3.263E-05 | 0.630 | 0.958 | 1421 |

|                                                |       |           |       |       |      |
|------------------------------------------------|-------|-----------|-------|-------|------|
| <b>Left caudal anterior cingulate cortex</b>   | 0.013 | 2.500E-05 | 0.632 | 0.958 | 1430 |
| <b>Right rostral anterior cingulate cortex</b> | 0.016 | 2.128E-05 | 0.544 | 0.958 | 1431 |
| <b>Right caudal anterior cingulate cortex</b>  | 0.021 | 2.181E-05 | 0.429 | 0.958 | 1441 |
| <b>Right caudal middle frontal gyrus</b>       | 0.024 | 1.346E-05 | 0.375 | 0.904 | 1440 |
| <b>Right medial orbitofrontal cortex</b>       | 0.027 | 1.616E-05 | 0.311 | 0.894 | 1442 |
| <b>Left banks superior temporal sulcus</b>     | 0.027 | 1.562E-05 | 0.331 | 0.894 | 1323 |
| <b>Right lateral orbitofrontal cortex</b>      | 0.027 | 1.457E-05 | 0.303 | 0.894 | 1452 |
| <b>Left lateral orbitofrontal cortex</b>       | 0.028 | 1.406E-05 | 0.304 | 0.894 | 1449 |
| <b>Right inferior temporal cortex</b>          | 0.029 | 1.404E-05 | 0.276 | 0.894 | 1443 |
| <b>Right pars orbitalis</b>                    | 0.031 | 1.879E-05 | 0.250 | 0.894 | 1450 |
| <b>Right entorhinal cortex</b>                 | 0.033 | 3.538E-05 | 0.238 | 0.894 | 1297 |
| <b>Left rostral anterior cingulate cortex</b>  | 0.050 | 2.114E-05 | 0.063 | 0.879 | 1429 |

**TABLE S41b:** Full mega-analytic results for the association between illness severity squared and the surface area of each structure in adult OCD patients based on the YBOCS, controlling for age, sex, scan center and ICV. Correlation coefficient Pearsons r is reported.

|                                                | <b>Pearson's r<br/>(YBOCS<sup>2</sup>)</b> | <b>Standard error</b> | <b>P-value</b> | <b>FDR P-value</b> | <b>N patients</b> |
|------------------------------------------------|--------------------------------------------|-----------------------|----------------|--------------------|-------------------|
| <b>Left pars orbitalis</b>                     | -0.092                                     | 0.006                 | 0.002          | 0.119              | 1443              |
| <b>Right rostral anterior cingulate cortex</b> | -0.074                                     | 0.010                 | 0.011          | 0.347              | 1431              |
| <b>Left paracentral lobule</b>                 | -0.069                                     | 0.014                 | 0.018          | 0.347              | 1444              |
| <b>Left lateral orbitofrontal cortex</b>       | -0.066                                     | 0.019                 | 0.032          | 0.347              | 1448              |
| <b>Right caudal anterior cingulate cortex</b>  | -0.066                                     | 0.012                 | 0.030          | 0.347              | 1440              |
| <b>Right lateral orbitofrontal cortex</b>      | -0.064                                     | 0.021                 | 0.053          | 0.347              | 1451              |
| <b>Left rostral anterior cingulate cortex</b>  | -0.063                                     | 0.011                 | 0.041          | 0.347              | 1428              |
| <b>Left posterior cingulate cortex</b>         | -0.062                                     | 0.013                 | 0.029          | 0.347              | 1447              |
| <b>Left middle temporal cortex</b>             | -0.061                                     | 0.028                 | 0.056          | 0.347              | 1329              |
| <b>Left superior temporal cortex</b>           | -0.059                                     | 0.031                 | 0.052          | 0.347              | 1294              |
| <b>Right surface area</b>                      | -0.058                                     | 0.401                 | 0.066          | 1.000              | 1450              |
| <b>Right inferior parietal cortex</b>          | -0.056                                     | 0.050                 | 0.048          | 0.347              | 1409              |
| <b>Right medial orbitofrontal cortex</b>       | -0.056                                     | 0.014                 | 0.085          | 0.370              | 1442              |
| <b>Right caudal middle frontal gyrus</b>       | -0.055                                     | 0.028                 | 0.061          | 0.347              | 1439              |
| <b>Right paracentral lobule</b>                | -0.053                                     | 0.016                 | 0.087          | 0.370              | 1448              |
| <b>Left surface area</b>                       | -0.052                                     | 0.398                 | 0.115          | 1.000              | 1452              |
| <b>Right posterior cingulate cortex</b>        | -0.051                                     | 0.014                 | 0.081          | 0.370              | 1448              |
| <b>Right rostral middle frontal gyrus</b>      | -0.050                                     | 0.047                 | 0.095          | 0.379              | 1447              |
| <b>Left precentral gyrus</b>                   | -0.050                                     | 0.036                 | 0.073          | 0.370              | 1426              |
| <b>Right insula</b>                            | -0.050                                     | 0.018                 | 0.138          | 0.460              | 1417              |
| <b>Right superior temporal cortex</b>          | -0.047                                     | 0.027                 | 0.100          | 0.379              | 1337              |
| <b>Left lateral occipital cortex</b>           | -0.047                                     | 0.039                 | 0.153          | 0.470              | 1434              |
| <b>Left superior frontal cortex</b>            | -0.046                                     | 0.051                 | 0.175          | 0.475              | 1397              |
| <b>Left banks superior temporal sulcus</b>     | -0.044                                     | 0.013                 | 0.142          | 0.460              | 1322              |
| <b>Right pars opercularis</b>                  | -0.044                                     | 0.018                 | 0.130          | 0.460              | 1434              |
| <b>Left rostral middle frontal gyrus</b>       | -0.043                                     | 0.047                 | 0.166          | 0.470              | 1439              |
| <b>Right cuneus</b>                            | -0.039                                     | 0.015                 | 0.248          | 0.553              | 1418              |

|                                       |        |       |       |       |      |
|---------------------------------------|--------|-------|-------|-------|------|
| Left medial orbitofrontal cortex      | -0.038 | 0.017 | 0.241 | 0.553 | 1444 |
| Right middle temporal cortex          | -0.036 | 0.027 | 0.216 | 0.553 | 1425 |
| Right superior frontal cortex         | -0.035 | 0.051 | 0.320 | 0.660 | 1436 |
| Left isthmus cingulate cortex         | -0.034 | 0.013 | 0.233 | 0.553 | 1446 |
| Left temporal pole                    | -0.034 | 0.005 | 0.165 | 0.470 | 1447 |
| Left caudal middle frontal gyrus      | -0.033 | 0.028 | 0.288 | 0.613 | 1432 |
| Right isthmus cingulate cortex        | -0.033 | 0.012 | 0.252 | 0.553 | 1450 |
| Right pars orbitalis                  | -0.031 | 0.008 | 0.351 | 0.702 | 1449 |
| Right superior parietal cortex        | -0.027 | 0.043 | 0.412 | 0.757 | 1423 |
| Right banks superior temporal sulcus  | -0.026 | 0.011 | 0.371 | 0.702 | 1350 |
| Left insula                           | -0.025 | 0.017 | 0.649 | 0.835 | 1426 |
| Left transverse temporal cortex       | -0.025 | 0.006 | 0.368 | 0.702 | 1447 |
| Left frontal pole                     | -0.025 | 0.003 | 0.438 | 0.764 | 1444 |
| Left caudal anterior cingulate cortex | -0.024 | 0.011 | 0.580 | 0.835 | 1429 |
| Right precuneus                       | -0.022 | 0.033 | 0.563 | 0.835 | 1445 |
| Right inferior temporal cortex        | -0.022 | 0.032 | 0.508 | 0.835 | 1442 |
| Right entorhinal cortex               | -0.022 | 0.008 | 0.527 | 0.835 | 1296 |
| Right frontal pole                    | -0.020 | 0.004 | 0.544 | 0.835 | 1449 |
| Left precuneus                        | -0.019 | 0.030 | 0.649 | 0.835 | 1447 |
| Right pericalcarine gyrus             | -0.019 | 0.018 | 0.737 | 0.849 | 1432 |
| Right pars triangularis               | -0.018 | 0.019 | 0.620 | 0.835 | 1419 |
| Left inferior parietal cortex         | -0.017 | 0.045 | 0.603 | 0.835 | 1391 |
| Right precentral gyrus                | -0.015 | 0.039 | 0.702 | 0.838 | 1411 |
| Left superior parietal cortex         | -0.014 | 0.045 | 0.731 | 0.849 | 1423 |
| Right transverse temporal cortex      | -0.013 | 0.004 | 0.608 | 0.835 | 1450 |
| Right lateral occipital cortex        | -0.013 | 0.041 | 0.882 | 0.961 | 1433 |
| Right fusiform gyrus                  | -0.013 | 0.029 | 0.690 | 0.838 | 1418 |
| Left inferior temporal cortex         | -0.011 | 0.033 | 0.890 | 0.961 | 1424 |
| Left pars opercularis                 | -0.010 | 0.020 | 0.879 | 0.961 | 1444 |
| Left pars triangularis                | -0.008 | 0.015 | 0.975 | 0.990 | 1445 |
| Left supramarginal gyrus              | -0.005 | 0.040 | 0.956 | 0.990 | 1325 |

|                                    |        |       |       |       |      |
|------------------------------------|--------|-------|-------|-------|------|
| <b>Left entorhinal cortex</b>      | -0.003 | 0.007 | 0.995 | 0.995 | 1340 |
| <b>Right postcentral gyrus</b>     | -0.002 | 0.032 | 0.970 | 0.990 | 1428 |
| <b>Left lingual gyrus</b>          | 0.002  | 0.030 | 0.683 | 0.838 | 1444 |
| <b>Right temporal pole</b>         | 0.005  | 0.005 | 0.975 | 0.990 | 1420 |
| <b>Right lingual gyrus</b>         | 0.005  | 0.030 | 0.612 | 0.835 | 1446 |
| <b>Left parahippocampal gyrus</b>  | 0.005  | 0.008 | 0.837 | 0.949 | 1445 |
| <b>Left fusiform gyrus</b>         | 0.007  | 0.030 | 0.651 | 0.835 | 1442 |
| <b>Left postcentral gyrus</b>      | 0.009  | 0.034 | 0.626 | 0.835 | 1420 |
| <b>Right supramarginal gyrus</b>   | 0.011  | 0.038 | 0.701 | 0.838 | 1349 |
| <b>Left cuneus</b>                 | 0.011  | 0.016 | 0.463 | 0.786 | 1419 |
| <b>Right parahippocampal gyrus</b> | 0.017  | 0.008 | 0.429 | 0.764 | 1442 |
| <b>Left pericalcarine gyrus</b>    | 0.021  | 0.017 | 0.231 | 0.553 | 1436 |

**TABLE S42a:** Full mega-analytic results for the association between illness severity squared and the cortical thickness of each structure in pediatric OCD patients based on the CYBOCS, controlling for age, sex and scan center. Correlation coefficient Pearsons r is reported.

|                                                | <b>Pearson's r<br/>(CYBOCS<sup>2</sup>)</b> | <b>Standard error</b> | <b>P-value</b> | <b>FDR P-value</b> | <b>N patients</b> |
|------------------------------------------------|---------------------------------------------|-----------------------|----------------|--------------------|-------------------|
| <b>Right caudal anterior cingulate cortex</b>  | -0.129                                      | 5.132E-05             | 0.011          | 0.773              | 398               |
| <b>Right rostral anterior cingulate cortex</b> | -0.103                                      | 5.345E-05             | 0.044          | 0.968              | 395               |
| <b>Right paracentral lobule</b>                | -0.098                                      | 3.267E-05             | 0.055          | 0.968              | 400               |
| <b>Left posterior cingulate cortex</b>         | -0.085                                      | 3.408E-05             | 0.098          | 0.968              | 398               |
| <b>Right isthmus cingulate cortex</b>          | -0.078                                      | 4.083E-05             | 0.129          | 0.968              | 396               |
| <b>Right rostral middle frontal gyrus</b>      | -0.077                                      | 3.042E-05             | 0.129          | 0.968              | 401               |
| <b>Right pars orbitalis</b>                    | -0.072                                      | 4.545E-05             | 0.154          | 0.968              | 401               |
| <b>Left paracentral lobule</b>                 | -0.065                                      | 3.295E-05             | 0.204          | 0.968              | 400               |
| <b>Right frontal pole</b>                      | -0.062                                      | 6.554E-05             | 0.220          | 0.968              | 403               |
| <b>Left banks superior temporal sulcus</b>     | -0.059                                      | 3.731E-05             | 0.267          | 0.968              | 367               |
| <b>Right cuneus</b>                            | -0.057                                      | 2.960E-05             | 0.260          | 0.968              | 398               |
| <b>Left lateral occipital cortex</b>           | -0.057                                      | 2.330E-05             | 0.263          | 0.968              | 399               |
| <b>Left cuneus</b>                             | -0.055                                      | 2.547E-05             | 0.281          | 0.968              | 400               |
| <b>Left fusiform gyrus</b>                     | -0.053                                      | 2.688E-05             | 0.297          | 0.968              | 396               |
| <b>Left entorhinal cortex</b>                  | -0.052                                      | 7.114E-05             | 0.329          | 0.968              | 367               |
| <b>Left precuneus</b>                          | -0.051                                      | 2.820E-05             | 0.314          | 0.968              | 400               |
| <b>Right parahippocampal gyrus</b>             | -0.050                                      | 5.502E-05             | 0.333          | 0.968              | 391               |
| <b>Left inferior parietal cortex</b>           | -0.047                                      | 2.904E-05             | 0.372          | 0.968              | 382               |
| <b>Right pars triangularis</b>                 | -0.042                                      | 3.477E-05             | 0.405          | 0.968              | 399               |
| <b>Right medial orbitofrontal cortex</b>       | -0.042                                      | 4.012E-05             | 0.413          | 0.968              | 394               |
| <b>Left parahippocampal gyrus</b>              | -0.039                                      | 5.669E-05             | 0.452          | 0.968              | 392               |
| <b>Right lateral occipital cortex</b>          | -0.038                                      | 2.392E-05             | 0.459          | 0.968              | 398               |
| <b>Right superior parietal cortex</b>          | -0.035                                      | 2.699E-05             | 0.498          | 0.968              | 398               |
| <b>Left superior parietal cortex</b>           | -0.035                                      | 2.679E-05             | 0.497          | 0.968              | 399               |
| <b>Left cortical thickness</b>                 | -0.028                                      | 1.979E-05             | 0.577          | 0.968              | 404               |
| <b>Left pars opercularis</b>                   | -0.028                                      | 3.170E-05             | 0.589          | 0.968              | 396               |
| <b>Left insula</b>                             | -0.026                                      | 3.337E-05             | 0.623          | 0.968              | 386               |

|                                        |        |           |       |       |     |
|----------------------------------------|--------|-----------|-------|-------|-----|
| Left pars triangularis                 | -0.024 | 3.586E-05 | 0.634 | 0.968 | 400 |
| Left postcentral gyrus                 | -0.024 | 2.438E-05 | 0.639 | 0.968 | 388 |
| Left temporal pole                     | -0.024 | 8.035E-05 | 0.645 | 0.968 | 396 |
| Right superior temporal cortex         | -0.023 | 3.383E-05 | 0.657 | 0.968 | 385 |
| Left superior temporal cortex          | -0.023 | 3.485E-05 | 0.667 | 0.968 | 378 |
| Right pars opercularis                 | -0.020 | 3.457E-05 | 0.689 | 0.968 | 397 |
| Left caudal anterior cingulate cortex  | -0.019 | 5.628E-05 | 0.711 | 0.968 | 393 |
| Right transverse temporal cortex       | -0.019 | 4.439E-05 | 0.708 | 0.968 | 403 |
| Right cortical thickness               | -0.019 | 2.004E-05 | 0.709 | 0.968 | 404 |
| Right insula                           | -0.019 | 3.604E-05 | 0.717 | 0.968 | 386 |
| Left medial orbitofrontal cortex       | -0.019 | 3.808E-05 | 0.716 | 0.968 | 397 |
| Right lateral orbitofrontal cortex     | -0.018 | 3.502E-05 | 0.719 | 0.968 | 402 |
| Left isthmus cingulate cortex          | -0.015 | 4.297E-05 | 0.777 | 0.994 | 396 |
| Right inferior parietal cortex         | -0.014 | 3.025E-05 | 0.791 | 0.994 | 389 |
| Left supramarginal gyrus               | -0.012 | 3.096E-05 | 0.814 | 0.994 | 380 |
| Right postcentral gyrus                | -0.012 | 2.537E-05 | 0.812 | 0.994 | 390 |
| Right precuneus                        | -0.012 | 2.829E-05 | 0.820 | 0.994 | 397 |
| Right superior frontal cortex          | -0.011 | 3.548E-05 | 0.824 | 0.994 | 393 |
| Left pars orbitalis                    | -0.010 | 5.057E-05 | 0.844 | 0.998 | 400 |
| Left lingual gyrus                     | -0.007 | 2.563E-05 | 0.887 | 0.998 | 400 |
| Left pericalcarine gyrus               | -0.005 | 2.806E-05 | 0.925 | 0.998 | 399 |
| Left middle temporal cortex            | -0.004 | 3.554E-05 | 0.934 | 0.998 | 386 |
| Right posterior cingulate cortex       | -0.003 | 3.092E-05 | 0.955 | 0.998 | 397 |
| Right middle temporal cortex           | -0.002 | 3.528E-05 | 0.968 | 0.998 | 388 |
| Left rostral anterior cingulate cortex | -0.002 | 5.556E-05 | 0.974 | 0.998 | 392 |
| Left rostral middle frontal gyrus      | -0.001 | 2.952E-05 | 0.987 | 0.998 | 403 |
| Left inferior temporal cortex          | 0.000  | 3.566E-05 | 0.998 | 0.998 | 395 |
| Left superior frontal cortex           | 0.003  | 3.421E-05 | 0.953 | 0.998 | 394 |
| Left frontal pole                      | 0.004  | 7.210E-05 | 0.945 | 0.998 | 402 |
| Left transverse temporal cortex        | 0.007  | 4.319E-05 | 0.889 | 0.998 | 401 |
| Right lingual gyrus                    | 0.020  | 2.651E-05 | 0.689 | 0.968 | 403 |

|                                             |       |           |       |       |     |
|---------------------------------------------|-------|-----------|-------|-------|-----|
| <b>Left lateral orbitofrontal cortex</b>    | 0.029 | 3.693E-05 | 0.572 | 0.968 | 403 |
| <b>Right entorhinal cortex</b>              | 0.030 | 7.313E-05 | 0.590 | 0.968 | 346 |
| <b>Right precentral gyrus</b>               | 0.031 | 2.909E-05 | 0.547 | 0.968 | 392 |
| <b>Right fusiform gyrus</b>                 | 0.039 | 2.831E-05 | 0.442 | 0.968 | 395 |
| <b>Right inferior temporal cortex</b>       | 0.046 | 3.385E-05 | 0.376 | 0.968 | 392 |
| <b>Left precentral gyrus</b>                | 0.047 | 2.711E-05 | 0.361 | 0.968 | 394 |
| <b>Right caudal middle frontal gyrus</b>    | 0.049 | 3.623E-05 | 0.336 | 0.968 | 396 |
| <b>Right supramarginal gyrus</b>            | 0.052 | 2.885E-05 | 0.317 | 0.968 | 384 |
| <b>Right temporal pole</b>                  | 0.056 | 8.292E-05 | 0.276 | 0.968 | 395 |
| <b>Right pericalcarine gyrus</b>            | 0.062 | 2.731E-05 | 0.228 | 0.968 | 398 |
| <b>Left caudal middle frontal gyrus</b>     | 0.067 | 3.421E-05 | 0.185 | 0.968 | 402 |
| <b>Right banks superior temporal sulcus</b> | 0.068 | 3.904E-05 | 0.191 | 0.968 | 381 |



**TABLE S42b:** Full mega-analytic results for the association between illness severity squared and the surface area of each structure in pediatric OCD patients based on the CYBOCS, controlling for age, sex, scan center and ICV. Correlation coefficient Pearsons r is reported.

|                                        | Pearson's r (CYBOCS <sup>2</sup> ) | Standard error | P-value | FDR P-value | N patients |
|----------------------------------------|------------------------------------|----------------|---------|-------------|------------|
| Right lateral orbitofrontal cortex     | -0.153                             | 0.053          | 0.002   | 0.168       | 401        |
| Right supramarginal gyrus              | -0.111                             | 0.086          | 0.034   | 0.655       | 383        |
| Right middle temporal cortex           | -0.106                             | 0.066          | 0.040   | 0.655       | 387        |
| Left caudal anterior cingulate cortex  | -0.099                             | 0.024          | 0.054   | 0.655       | 392        |
| Left lateral orbitofrontal cortex      | -0.096                             | 0.054          | 0.058   | 0.655       | 402        |
| Right postcentral gyrus                | -0.091                             | 0.076          | 0.078   | 0.763       | 389        |
| Left pars orbitalis                    | -0.084                             | 0.014          | 0.101   | 0.857       | 399        |
| Right transverse temporal cortex       | -0.076                             | 0.011          | 0.136   | 0.885       | 402        |
| Right superior temporal cortex         | -0.073                             | 0.061          | 0.158   | 0.885       | 384        |
| Left transverse temporal cortex        | -0.069                             | 0.012          | 0.176   | 0.885       | 400        |
| Left insula                            | -0.065                             | 0.039          | 0.208   | 0.885       | 385        |
| Left lateral occipital cortex          | -0.064                             | 0.093          | 0.208   | 0.885       | 398        |
| Left rostral anterior cingulate cortex | -0.063                             | 0.028          | 0.221   | 0.885       | 391        |
| Left posterior cingulate cortex        | -0.062                             | 0.031          | 0.226   | 0.885       | 397        |
| Right rostral middle frontal gyrus     | -0.060                             | 0.121          | 0.242   | 0.885       | 400        |
| Right medial orbitofrontal cortex      | -0.059                             | 0.035          | 0.253   | 0.885       | 393        |
| Right cuneus                           | -0.057                             | 0.038          | 0.263   | 0.885       | 397        |
| Right pars opercularis                 | -0.056                             | 0.039          | 0.273   | 0.885       | 396        |
| Left rostral middle frontal gyrus      | -0.047                             | 0.113          | 0.355   | 0.911       | 402        |
| Left superior frontal cortex           | -0.046                             | 0.115          | 0.377   | 0.911       | 393        |
| Left precentral gyrus                  | -0.044                             | 0.076          | 0.394   | 0.911       | 393        |
| Right temporal pole                    | -0.043                             | 0.011          | 0.407   | 0.911       | 394        |
| Right precentral gyrus                 | -0.042                             | 0.075          | 0.412   | 0.911       | 391        |
| Left middle temporal cortex            | -0.041                             | 0.064          | 0.435   | 0.911       | 385        |
| Right surface area                     | -0.040                             | 0.981          | 0.428   | 1.000       | 403        |
| Left superior temporal cortex          | -0.038                             | 0.068          | 0.469   | 0.911       | 377        |
| Right lateral occipital cortex         | -0.036                             | 0.094          | 0.487   | 0.911       | 397        |

|                                      |        |       |       |       |     |
|--------------------------------------|--------|-------|-------|-------|-----|
| Right superior frontal cortex        | -0.032 | 0.128 | 0.533 | 0.911 | 392 |
| Left banks superior temporal sulcus  | -0.032 | 0.032 | 0.547 | 0.911 | 366 |
| Right insula                         | -0.030 | 0.042 | 0.563 | 0.911 | 385 |
| Right caudal middle frontal gyrus    | -0.025 | 0.063 | 0.626 | 0.911 | 395 |
| Left medial orbitofrontal cortex     | -0.024 | 0.042 | 0.642 | 0.911 | 396 |
| Left parahippocampal gyrus           | -0.022 | 0.019 | 0.674 | 0.911 | 391 |
| Left surface area                    | -0.018 | 0.964 | 0.722 | 1.000 | 403 |
| Right lingual gyrus                  | -0.018 | 0.071 | 0.723 | 0.911 | 402 |
| Left entorhinal cortex               | -0.017 | 0.015 | 0.745 | 0.911 | 366 |
| Right pericalcarine gyrus            | -0.017 | 0.042 | 0.736 | 0.911 | 397 |
| Right paracentral lobule             | -0.016 | 0.038 | 0.754 | 0.911 | 399 |
| Left isthmus cingulate cortex        | -0.014 | 0.029 | 0.784 | 0.911 | 396 |
| Right fusiform gyrus                 | -0.014 | 0.064 | 0.791 | 0.911 | 394 |
| Left lingual gyrus                   | -0.004 | 0.073 | 0.933 | 0.985 | 399 |
| Left inferior parietal cortex        | 0.000  | 0.100 | 0.993 | 0.993 | 381 |
| Left postcentral gyrus               | 0.002  | 0.076 | 0.974 | 0.989 | 387 |
| Right pars triangularis              | 0.003  | 0.041 | 0.956 | 0.985 | 398 |
| Left supramarginal gyrus             | 0.003  | 0.093 | 0.952 | 0.985 | 379 |
| Left inferior temporal cortex        | 0.003  | 0.077 | 0.950 | 0.985 | 394 |
| Left superior parietal cortex        | 0.004  | 0.108 | 0.943 | 0.985 | 398 |
| Left caudal middle frontal gyrus     | 0.005  | 0.063 | 0.930 | 0.985 | 401 |
| Left frontal pole                    | 0.010  | 0.007 | 0.838 | 0.950 | 401 |
| Left precuneus                       | 0.014  | 0.074 | 0.781 | 0.911 | 399 |
| Right banks superior temporal sulcus | 0.016  | 0.025 | 0.762 | 0.911 | 380 |
| Right isthmus cingulate cortex       | 0.018  | 0.026 | 0.727 | 0.911 | 395 |
| Left paracentral lobule              | 0.019  | 0.031 | 0.710 | 0.911 | 399 |
| Left pericalcarine gyrus             | 0.020  | 0.041 | 0.695 | 0.911 | 398 |
| Right pars orbitalis                 | 0.024  | 0.018 | 0.644 | 0.911 | 400 |
| Right inferior temporal cortex       | 0.024  | 0.075 | 0.643 | 0.911 | 391 |
| Right superior parietal cortex       | 0.024  | 0.106 | 0.639 | 0.911 | 397 |
| Left temporal pole                   | 0.026  | 0.012 | 0.610 | 0.911 | 395 |

|                                                |       |       |       |       |     |
|------------------------------------------------|-------|-------|-------|-------|-----|
| <b>Right parahippocampal gyrus</b>             | 0.027 | 0.020 | 0.604 | 0.911 | 390 |
| <b>Left fusiform gyrus</b>                     | 0.029 | 0.068 | 0.579 | 0.911 | 395 |
| <b>Right posterior cingulate cortex</b>        | 0.029 | 0.030 | 0.571 | 0.911 | 396 |
| <b>Right inferior parietal cortex</b>          | 0.034 | 0.117 | 0.515 | 0.911 | 388 |
| <b>Right rostral anterior cingulate cortex</b> | 0.041 | 0.023 | 0.424 | 0.911 | 394 |
| <b>Right precuneus</b>                         | 0.042 | 0.078 | 0.409 | 0.911 | 396 |
| <b>Left pars opercularis</b>                   | 0.043 | 0.047 | 0.400 | 0.911 | 395 |
| <b>Right caudal anterior cingulate cortex</b>  | 0.045 | 0.025 | 0.381 | 0.911 | 397 |
| <b>Left cuneus</b>                             | 0.046 | 0.036 | 0.365 | 0.911 | 399 |
| <b>Right frontal pole</b>                      | 0.058 | 0.008 | 0.256 | 0.885 | 402 |
| <b>Left pars triangularis</b>                  | 0.079 | 0.034 | 0.121 | 0.885 | 399 |
| <b>Right entorhinal cortex</b>                 | 0.112 | 0.014 | 0.041 | 0.655 | 345 |
